# Supplementary material for: Ixodes scapularis nymph saliva protein blocks host inflammation and complement-mediated killing of Lyme disease agent, Borrelia burgdorferi
Source: Front Cell Infect Microbiol. 2023 Oct 26;13:1253670. doi: 10.3389/fcimb.2023.1253670 (PMC10641286; doi:10.3389/fcimb.2023.1253670)
Supplement: Supplementary file 1 [file Table_1.xlsx]

## Sheet: Samples Report With Clusters fo
ICBR-PM-1084-Pichia_pastoris_recombinant, Samples report created on 04/13/2023
Experiment: ICBR-PM-1084-Pichia_pastoris_recombinant
	Peak List Generator: unknown
		Version: unknown
		Charge States Calculated: unknown
		Deisotoped: unknown
		Textual Annotation: unknown
	Database Set: 1 Database
		Database Name: the UniProt_Pichia_pastoris_recombinant_20230410 database
			Version: unknown
			Taxonomy: All Entries
			Number of Proteins: 16168
		Does database contain common contaminants?: unknown
	Search Engine Set: 1 Search Engine
		Search Engine: Mascot
			Version: 2.7.0
			Samples: All Samples
			Fragment Tolerance: 0.50 Da (Monoisotopic)
			Parent Tolerance: 20 PPM (Monoisotopic)
			Fixed Modifications: +18 on O (O+18), +57 on C (Carbamidomethyl)
			Variable Modifications: -17 on n (Gln->pyro-Glu), +1 on NQ (Deamidated), +16 on M (Oxidation), +42 on n (Acetyl)
			Database: the UniProt_Pichia_pastoris_recombinant_20230410 database (unknown version, 16168 entries)
			Digestion Enzyme: Trypsin
			Max Missed Cleavages: 2
			Probability Model:
				1_B3_1_3953_6.1.119 (F002762): LFDR Model, Classifier data: Bayes, Good (50%) m:77.7/s:28.7 m:30.6/s:2.23 m:NA m:56.4/s:35.0, Bad (50%) m:20.0/s:5.58 m:28.0/s:2.44 m:NA m:9.57/s:6.75 [all charge states]
				2_B4_1_3955_6.1.119 (F002763): LFDR Model, Classifier data: Bayes, Good (50%) m:74.2/s:29.9 m:30.3/s:2.34 m:NA m:55.7/s:34.3, Bad (50%) m:16.9/s:5.14 m:27.6/s:2.41 m:NA m:8.26/s:5.87 [all charge states]
				3_B5_1_3957_6.1.119 (F002764): LFDR Model, Classifier data: Bayes, Good (50%) m:94.6/s:32.2 m:30.9/s:1.63 m:NA m:74.5/s:40.3, Bad (50%) m:35.1/s:5.18 m:29.0/s:1.93 m:NA m:18.7/s:11.3 [all charge states]
				4_B6_1_3959_6.1.119 (F002765): LFDR Model, Classifier data: Bayes, Good (50%) m:81.4/s:24.9 m:30.0/s:2.12 m:NA m:65.6/s:31.7, Bad (50%) m:33.2/s:6.00 m:29.2/s:2.17 m:NA m:15.4/s:9.72 [all charge states]
				5_B7_1_3961_6.1.119 (F002766): LFDR Model, Classifier data: Bayes, Good (50%) m:80.6/s:23.3 m:30.4/s:1.85 m:NA m:58.4/s:29.9, Bad (50%) m:29.3/s:6.06 m:28.9/s:2.35 m:NA m:14.5/s:8.98 [all charge states]
				6_B8_1_3963_6.1.119 (F002767): LFDR Model, Classifier data: Bayes, Good (50%) m:80.9/s:30.7 m:30.6/s:2.12 m:NA m:57.9/s:34.8, Bad (50%) m:19.6/s:5.51 m:27.6/s:2.38 m:NA m:10.3/s:7.23 [all charge states]
				7_C3_1_3965_6.1.119 (F002768): LFDR Model, Classifier data: Bayes, Good (50%) m:72.4/s:29.0 m:30.2/s:2.28 m:NA m:51.0/s:31.9, Bad (50%) m:16.6/s:5.75 m:27.6/s:2.36 m:NA m:8.57/s:6.36 [all charge states]
				8_C4_1_3967_6.1.119 (F002769): LFDR Model, Classifier data: Bayes, Good (50%) m:65.9/s:23.6 m:29.6/s:2.24 m:NA m:48.5/s:24.2, Bad (50%) m:22.4/s:6.31 m:28.2/s:2.29 m:NA m:10.7/s:7.73 [all charge states]
				9_C5_1_3969_6.1.119 (F002770): LFDR Model, Classifier data: Bayes, Good (50%) m:78.5/s:25.3 m:30.1/s:2.20 m:NA m:52.0/s:29.8, Bad (50%) m:24.9/s:7.14 m:28.2/s:2.45 m:NA m:11.6/s:8.88 [all charge states]
				10_C6_1_3971_6.1.119 (F002771): LFDR Model, Classifier data: Bayes, Good (50%) m:80.0/s:30.8 m:30.2/s:2.30 m:NA m:53.7/s:33.1, Bad (50%) m:20.6/s:6.01 m:27.8/s:2.34 m:NA m:10.00/s:7.33 [all charge states]
				11_C7_1_3973_6.1.119 (F002772): LFDR Model, Classifier data: Bayes, Good (50%) m:78.4/s:31.3 m:30.4/s:2.26 m:NA m:55.7/s:37.0, Bad (50%) m:18.7/s:5.69 m:27.6/s:2.39 m:NA m:9.60/s:6.79 [all charge states]
				12_C8_1_3975_6.1.119 (F002773): LFDR Model, Classifier data: Bayes, Good (50%) m:76.1/s:29.9 m:30.5/s:2.19 m:NA m:54.4/s:33.0, Bad (50%) m:17.2/s:5.37 m:27.5/s:2.33 m:NA m:8.77/s:6.30 [all charge states]
	Scaffold: Version: Scaffold_4.2.1
		Modification Metadata Set: 1541 modifications
			Source: C:\Program Files\Scaffold 4\parameters\unimod.xml
			Comment:
		Protein Grouping Strategy: Experiment-wide grouping with protein cluster analysis
		Peptide Thresholds: 95.0% minimum
		Protein Thresholds: 95.0% minimum and 2 peptides minimum
		Peptide FDR: 37.0% (Decoy)
		Protein FDR: 100.0% (Decoy)
		GO Annotation Source(s):
ICBR-PM-1084-Pichia_pastoris_recombinant	Displaying:Total Spectrum Count								Uncategorized Sample	Uncategorized Sample	Uncategorized Sample	Uncategorized Sample	Uncategorized Sample	Uncategorized Sample	Uncategorized Sample	Uncategorized Sample	Uncategorized Sample	Uncategorized Sample	Uncategorized Sample	Uncategorized Sample
#	Visible?	Starred?	Identified Proteins (5633)	Accession Number	Molecular Weight	Protein Grouping Ambiguity	Quantitative Variance	Taxonomy	1	2	3	4	5	6	7	8	9	10	11	12
1	TRUE	Empty	Recombinant IxsS41 protein	rIxsS41	43 kDa			unknown	1745	1732	114	98	275	1695	1814	448	703	1152	1673	2023
2	TRUE	Empty	Cluster of One of two (See also PSK1) PAS domain containing S/T protein kinases OS=Komagataella phaffii (strain GS115 / ATCC 20864) OX=644223 GN=PAS_chr4_0076 PE=4 SV=1 (C4R6S7_KOMPG)	C4R6S7_KOMPG [3]	137 kDa	TRUE		unknown	1	0	0	0	2	2	0	0	0	1	0	0
2.1	TRUE	Empty	One of two (See also PSK1) PAS domain containing S/T protein kinases OS=Komagataella phaffii (strain GS115 / ATCC 20864) OX=644223 GN=PAS_chr4_0076 PE=4 SV=1	C4R6S7_KOMPG (+1)	137 kDa	TRUE		unknown	1	0	0	0	1	2	0	0	0	1	0	0
2.2	TRUE	Empty	BA75_03245T0 OS=Komagataella pastoris OX=4922 GN=PSK2 PE=4 SV=1	A0A1B2JCZ4_PICPA	137 kDa	TRUE		unknown	0	0	0	0	2	1	0	0	0	1	0	0
3	TRUE	Empty	Cluster of tr|A0A1B2J8I1|A0A1B2J8I1_PICPA-DECOY	tr|A0A1B2J8I1|A0A1B2J8I1_PICPA-DECOY [3]	?	TRUE		unknown	3	0	3	3	7	0	0	2	2	5	3	0
3.1	TRUE	Empty	tr|A0A1B2J8I1|A0A1B2J8I1_PICPA-DECOY	tr|A0A1B2J8I1|A0A1B2J8I1_PICPA-DECOY	?	TRUE		unknown	1	0	3	2	5	0	0	2	1	3	2	0
3.2	TRUE	Empty	tr|C4QWD1|C4QWD1_KOMPG-DECOY	tr|C4QWD1|C4QWD1_KOMPG-DECOY (+1)	?	TRUE		unknown	2	0	1	2	5	0	0	1	1	2	3	0
4	TRUE	Empty	Cluster of Midasin OS=Komagataella phaffii (strain GS115 / ATCC 20864) OX=644223 GN=PAS_chr1-1_0187 PE=3 SV=1 (C4QWD1_KOMPG)	C4QWD1_KOMPG [3]	560 kDa	TRUE		unknown	0	0	3	4	1	2	0	0	1	6	4	0
4.1	TRUE	Empty	Midasin OS=Komagataella phaffii (strain GS115 / ATCC 20864) OX=644223 GN=PAS_chr1-1_0187 PE=3 SV=1	C4QWD1_KOMPG (+1)	560 kDa	TRUE		unknown	0	0	2	4	1	2	0	0	0	4	3	0
4.2	TRUE	Empty	Midasin OS=Komagataella pastoris OX=4922 GN=MDN1 PE=3 SV=1	A0A1B2J8I1_PICPA	558 kDa	TRUE		unknown	0	0	2	4	1	1	0	0	1	3	2	0
5	TRUE	Empty	Cluster of tr|A0A1B2JFE4|A0A1B2JFE4_PICPA-DECOY	tr|A0A1B2JFE4|A0A1B2JFE4_PICPA-DECOY [3]	?	TRUE		unknown	2	0	0	2	4	3	0	1	1	1	0	0
5.1	TRUE	Empty	tr|A0A1B2JFE4|A0A1B2JFE4_PICPA-DECOY	tr|A0A1B2JFE4|A0A1B2JFE4_PICPA-DECOY	?	TRUE		unknown	1	0	0	1	3	3	0	1	1	1	0	0
5.2	TRUE	Empty	tr|C4R6F6|C4R6F6_KOMPG-DECOY	tr|C4R6F6|C4R6F6_KOMPG-DECOY (+1)	?	TRUE		unknown	1	0	0	1	2	2	0	0	1	0	0	0
6	TRUE	Empty	Cluster of tr|C4R8H1|C4R8H1_KOMPG-DECOY	tr|C4R8H1|C4R8H1_KOMPG-DECOY [3]	?	TRUE		unknown	5	0	3	1	3	4	0	0	1	5	1	0
6.1	TRUE	Empty	tr|C4R8H1|C4R8H1_KOMPG-DECOY	tr|C4R8H1|C4R8H1_KOMPG-DECOY (+1)	?	TRUE		unknown	3	0	3	0	2	3	0	0	1	4	1	0
6.2	TRUE	Empty	tr|A0A1B2JIC3|A0A1B2JIC3_PICPA-DECOY	tr|A0A1B2JIC3|A0A1B2JIC3_PICPA-DECOY	?	TRUE		unknown	5	0	2	1	1	2	0	0	0	1	1	0
7	TRUE	Empty	Cluster of BA75_04135T0 OS=Komagataella pastoris OX=4922 GN=TRA1 PE=4 SV=1 (A0A1B2JEL3_PICPA)	A0A1B2JEL3_PICPA [3]	438 kDa	TRUE		unknown	1	0	2	2	9	2	0	1	1	3	3	0
7.1	TRUE	Empty	BA75_04135T0 OS=Komagataella pastoris OX=4922 GN=TRA1 PE=4 SV=1	A0A1B2JEL3_PICPA	438 kDa	TRUE		unknown	1	0	2	2	4	2	0	1	1	3	3	0
7.2	TRUE	Empty	Transcription-associated protein OS=Komagataella phaffii (strain GS115 / ATCC 20864) OX=644223 GN=PAS_chr1-4_0571 PE=1 SV=1	C4QYV4_KOMPG (+1)	438 kDa	TRUE		unknown	1	0	2	2	8	2	0	1	1	3	3	0
8	TRUE	Empty	Cluster of tr|F2QLF7|F2QLF7_KOMPC-DECOY	tr|F2QLF7|F2QLF7_KOMPC-DECOY [2]	?	TRUE		unknown	1	0	0	0	4	2	0	0	3	3	0	0
8.1	TRUE	Empty	tr|F2QLF7|F2QLF7_KOMPC-DECOY	tr|F2QLF7|F2QLF7_KOMPC-DECOY	?	TRUE		unknown	1	0	0	0	2	2	0	0	3	3	0	0
8.2	TRUE	Empty	tr|A0A1B2J6M3|A0A1B2J6M3_PICPA-DECOY	tr|A0A1B2J6M3|A0A1B2J6M3_PICPA-DECOY	?	TRUE		unknown	1	0	0	0	4	2	0	0	2	2	0	0
9	TRUE	Empty	Cluster of tr|C4QV66|C4QV66_KOMPG-DECOY	tr|C4QV66|C4QV66_KOMPG-DECOY [2]	?	TRUE		unknown	5	0	0	1	5	6	0	0	3	3	2	0
9.1	TRUE	Empty	tr|C4QV66|C4QV66_KOMPG-DECOY	tr|C4QV66|C4QV66_KOMPG-DECOY	?	TRUE		unknown	4	0	0	0	2	5	0	0	3	1	2	0
9.2	TRUE	Empty	tr|A0A1B2JA06|A0A1B2JA06_PICPA-DECOY	tr|A0A1B2JA06|A0A1B2JA06_PICPA-DECOY	?	TRUE		unknown	2	0	0	1	3	4	0	0	2	3	2	0
10	TRUE	Empty	Cluster of Formin, nucleates the formation of linear actin filaments OS=Komagataella phaffii (strain GS115 / ATCC 20864) OX=644223 GN=PAS_chr4_0636 PE=4 SV=1 (C4R8H1_KOMPG)	C4R8H1_KOMPG [3]	204 kDa	TRUE		unknown	2	0	0	1	7	2	0	0	0	2	2	0
10.1	TRUE	Empty	Formin, nucleates the formation of linear actin filaments OS=Komagataella phaffii (strain GS115 / ATCC 20864) OX=644223 GN=PAS_chr4_0636 PE=4 SV=1	C4R8H1_KOMPG (+1)	204 kDa	TRUE		unknown	2	0	0	1	4	1	0	0	0	2	2	0
10.2	TRUE	Empty	BA75_04686T0 OS=Komagataella pastoris OX=4922 GN=BNI1 PE=4 SV=1	A0A1B2JIC3_PICPA	204 kDa	TRUE		unknown	1	0	0	1	4	2	0	0	0	0	1	0
11	TRUE	Empty	Cluster of BA75_05165T0 OS=Komagataella pastoris OX=4922 GN=NYV1 PE=4 SV=1 (A0A1B2JIZ6_PICPA)	A0A1B2JIZ6_PICPA	35 kDa	TRUE		unknown	3	0	0	0	4	6	0	0	1	6	2	0
11.1	TRUE	Empty	BA75_05165T0 OS=Komagataella pastoris OX=4922 GN=NYV1 PE=4 SV=1	A0A1B2JIZ6_PICPA	35 kDa	TRUE		unknown	1	0	0	0	3	2	0	0	0	4	0	0
11.2	TRUE	Empty	Uncharacterized protein OS=Komagataella phaffii (strain ATCC 76273 / CBS 7435 / CECT 11047 / NRRL Y-11430 / Wegner 21-1) OX=981350 GN=PP7435_Chr2-1211 PE=4 SV=1	F2QU08_KOMPC	25 kDa	TRUE		unknown	2	0	0	0	1	4	0	0	1	2	2	0
11.3	TRUE	Empty	V-SNARE coiled-coil homology domain-containing protein OS=Komagataella phaffii (strain GS115 / ATCC 20864) OX=644223 GN=PAS_chr2-1_0099 PE=4 SV=1	C4QZM7_KOMPG	35 kDa	TRUE		unknown	2	0	0	0	2	4	0	0	1	2	2	0
12	TRUE	Empty	Cluster of Vacuolar protein sorting-associated protein OS=Komagataella pastoris OX=4922 GN=VPS13 PE=3 SV=1 (A0A1B2J9P1_PICPA)	A0A1B2J9P1_PICPA [3]	354 kDa	TRUE		unknown	3	0	3	0	3	1	0	0	1	5	0	0
12.1	TRUE	Empty	Vacuolar protein sorting-associated protein OS=Komagataella pastoris OX=4922 GN=VPS13 PE=3 SV=1	A0A1B2J9P1_PICPA	354 kDa	TRUE		unknown	3	0	2	0	3	1	0	0	1	3	0	0
12.2	TRUE	Empty	Vacuolar protein sorting-associated protein OS=Komagataella phaffii (strain GS115 / ATCC 20864) OX=644223 GN=PAS_chr1-1_0211 PE=3 SV=1	C4QWF7_KOMPG (+1)	354 kDa	TRUE		unknown	2	0	3	0	1	0	0	0	0	4	0	0
13	TRUE	Empty	tr|A0A1B2JDX9|A0A1B2JDX9_PICPA-DECOY	tr|A0A1B2JDX9|A0A1B2JDX9_PICPA-DECOY	?	TRUE		unknown	6	0	2	1	3	5	0	0	1	4	4	0
14	TRUE	Empty	Cluster of Signal recognition particle 54 kDa protein OS=Komagataella pastoris OX=4922 GN=SRP54 PE=3 SV=1 (A0A1B2JAF6_PICPA)	A0A1B2JAF6_PICPA [2]	57 kDa	TRUE		unknown	0	0	0	0	2	1	0	0	0	0	1	0
14.1	TRUE	Empty	Signal recognition particle 54 kDa protein OS=Komagataella pastoris OX=4922 GN=SRP54 PE=3 SV=1	A0A1B2JAF6_PICPA	57 kDa	TRUE		unknown	0	0	0	0	1	1	0	0	0	0	1	0
14.2	TRUE	Empty	Signal recognition particle 54 kDa protein OS=Komagataella phaffii (strain GS115 / ATCC 20864) OX=644223 GN=PAS_chr4_0322 PE=3 SV=1	C4R7J0_KOMPG (+1)	57 kDa	TRUE		unknown	0	0	0	0	2	1	0	0	0	0	1	0
15	TRUE	Empty	Cluster of tr|A0A1B2JEL3|A0A1B2JEL3_PICPA-DECOY	tr|A0A1B2JEL3|A0A1B2JEL3_PICPA-DECOY [3]	?	TRUE		unknown	1	0	3	1	2	1	0	0	1	3	1	0
15.1	TRUE	Empty	tr|A0A1B2JEL3|A0A1B2JEL3_PICPA-DECOY	tr|A0A1B2JEL3|A0A1B2JEL3_PICPA-DECOY	?	TRUE		unknown	1	0	3	0	1	1	0	0	1	2	1	0
15.2	TRUE	Empty	tr|C4QYV4|C4QYV4_KOMPG-DECOY	tr|C4QYV4|C4QYV4_KOMPG-DECOY (+1)	?	TRUE		unknown	0	0	3	1	2	1	0	0	0	3	1	0
16	TRUE	Empty	Cluster of Voltage-gated high-affinity calcium channel OS=Komagataella phaffii (strain GS115 / ATCC 20864) OX=644223 GN=PAS_chr2-1_0301 PE=4 SV=1 (C4R091_KOMPG)	C4R091_KOMPG [2]	240 kDa	TRUE		unknown	0	0	2	1	1	4	0	0	3	3	1	0
16.1	TRUE	Empty	Voltage-gated high-affinity calcium channel OS=Komagataella phaffii (strain GS115 / ATCC 20864) OX=644223 GN=PAS_chr2-1_0301 PE=4 SV=1	C4R091_KOMPG (+1)	240 kDa	TRUE		unknown	0	0	1	1	1	4	0	0	3	3	1	0
16.2	TRUE	Empty	BA75_04955T0 OS=Komagataella pastoris OX=4922 GN=ATY40_BA7504955 PE=4 SV=1	A0A1B2JIW4_PICPA	171 kDa	TRUE		unknown	0	0	1	0	1	1	0	0	1	1	0	0
17	TRUE	Empty	Cluster of tr|C4R7G0|C4R7G0_KOMPG-DECOY	tr|C4R7G0|C4R7G0_KOMPG-DECOY [3]	?	TRUE		unknown	4	0	0	4	4	0	0	0	2	4	1	0
17.1	TRUE	Empty	tr|C4R7G0|C4R7G0_KOMPG-DECOY	tr|C4R7G0|C4R7G0_KOMPG-DECOY (+1)	?	TRUE		unknown	2	0	0	4	4	0	0	0	2	3	1	0
17.2	TRUE	Empty	tr|A0A1B2JBX3|A0A1B2JBX3_PICPA-DECOY	tr|A0A1B2JBX3|A0A1B2JBX3_PICPA-DECOY	?	TRUE		unknown	3	0	0	1	1	0	0	0	2	3	0	0
18	TRUE	Empty	Cluster of BA75_03420T0 OS=Komagataella pastoris OX=4922 GN=PRP8 PE=4 SV=1 (A0A1B2JFE4_PICPA)	A0A1B2JFE4_PICPA [3]	284 kDa	TRUE		unknown	0	0	2	1	5	3	0	0	0	4	0	0
18.1	TRUE	Empty	BA75_03420T0 OS=Komagataella pastoris OX=4922 GN=PRP8 PE=4 SV=1	A0A1B2JFE4_PICPA	284 kDa	TRUE		unknown	0	0	2	1	4	3	0	0	0	2	0	0
18.2	TRUE	Empty	Component of the U4/U6-U5 snRNP complex, involved in the second catalytic step of splicing OS=Komagataella phaffii (strain GS115 / ATCC 20864) OX=644223 GN=PAS_chr3_1077 PE=4 SV=1	C4R6F6_KOMPG (+1)	281 kDa	TRUE		unknown	0	0	1	0	3	2	0	0	0	3	0	0
19	TRUE	Empty	tr|F2R0K4|F2R0K4_KOMPC-DECOY	tr|F2R0K4|F2R0K4_KOMPC-DECOY	?			unknown	4	0	1	0	3	0	0	0	0	6	3	0
20	TRUE	Empty	BA75_02408T0 OS=Komagataella pastoris OX=4922 GN=DYN1 PE=4 SV=1	A0A1B2JDX9_PICPA	475 kDa	TRUE		unknown	2	0	2	3	6	2	0	0	4	4	2	0
21	TRUE	Empty	Cluster of tr|A0A1B2JB31|A0A1B2JB31_PICPA-DECOY	tr|A0A1B2JB31|A0A1B2JB31_PICPA-DECOY [3]	?	TRUE		unknown	3	0	0	0	0	3	0	1	0	2	3	0
21.1	TRUE	Empty	tr|A0A1B2JB31|A0A1B2JB31_PICPA-DECOY	tr|A0A1B2JB31|A0A1B2JB31_PICPA-DECOY	?	TRUE		unknown	2	0	0	0	0	3	0	1	0	1	2	0
21.2	TRUE	Empty	tr|C4R1Z5|C4R1Z5_KOMPG-DECOY	tr|C4R1Z5|C4R1Z5_KOMPG-DECOY (+1)	?	TRUE		unknown	3	0	0	0	0	2	0	1	0	2	3	0
22	TRUE	Empty	Cluster of tr|C4R3D7|C4R3D7_KOMPG-DECOY	tr|C4R3D7|C4R3D7_KOMPG-DECOY [2]	?	TRUE		unknown	4	0	1	0	5	6	0	0	1	4	2	0
22.1	TRUE	Empty	tr|C4R3D7|C4R3D7_KOMPG-DECOY	tr|C4R3D7|C4R3D7_KOMPG-DECOY	?	TRUE		unknown	3	0	1	0	4	5	0	0	1	4	2	0
22.2	TRUE	Empty	tr|A0A1B2J6N1|A0A1B2J6N1_PICPA-DECOY	tr|A0A1B2J6N1|A0A1B2J6N1_PICPA-DECOY	?	TRUE		unknown	4	0	0	0	4	6	0	0	1	3	0	0
23	TRUE	Empty	Cluster of tr|C4R4N6|C4R4N6_KOMPG-DECOY	tr|C4R4N6|C4R4N6_KOMPG-DECOY	?	TRUE		unknown	1	0	0	0	2	1	0	0	0	0	0	0
23.1	TRUE	Empty	tr|C4R4N6|C4R4N6_KOMPG-DECOY	tr|C4R4N6|C4R4N6_KOMPG-DECOY	?	TRUE		unknown	1	0	0	0	1	0	0	0	0	0	0	0
23.2	TRUE	Empty	tr|A0A1B2J7Q4|A0A1B2J7Q4_PICPA-DECOY	tr|A0A1B2J7Q4|A0A1B2J7Q4_PICPA-DECOY	?	TRUE		unknown	0	0	0	0	1	1	0	0	0	0	0	0
23.3	TRUE	Empty	tr|A0A1G4KQH3|A0A1G4KQH3_KOMPC-DECOY	tr|A0A1G4KQH3|A0A1G4KQH3_KOMPC-DECOY	?	TRUE		unknown	0	0	0	0	0	0	0	0	0	0	0	0
24	TRUE	Empty	Cluster of tr|C4R7J0|C4R7J0_KOMPG-DECOY	tr|C4R7J0|C4R7J0_KOMPG-DECOY [3]	?	TRUE		unknown	1	0	0	1	2	0	0	0	0	2	3	0
24.1	TRUE	Empty	tr|C4R7J0|C4R7J0_KOMPG-DECOY	tr|C4R7J0|C4R7J0_KOMPG-DECOY (+1)	?	TRUE		unknown	1	0	0	1	1	0	0	0	0	2	3	0
24.2	TRUE	Empty	tr|A0A1B2JAF6|A0A1B2JAF6_PICPA-DECOY	tr|A0A1B2JAF6|A0A1B2JAF6_PICPA-DECOY	?	TRUE		unknown	1	0	0	1	2	0	0	0	0	2	3	0
25	TRUE	Empty	Cluster of CCR4-NOT complex component OS=Komagataella phaffii (strain ATCC 76273 / CBS 7435 / CECT 11047 / NRRL Y-11430 / Wegner 21-1) OX=981350 GN=CDC39 PE=4 SV=1 (A0A1G4KQU4_KOMPC)	A0A1G4KQU4_KOMPC [3]	223 kDa	TRUE		unknown	2	0	0	0	2	4	0	0	1	13	3	0
25.1	TRUE	Empty	CCR4-NOT complex component OS=Komagataella phaffii (strain ATCC 76273 / CBS 7435 / CECT 11047 / NRRL Y-11430 / Wegner 21-1) OX=981350 GN=CDC39 PE=4 SV=1	A0A1G4KQU4_KOMPC (+1)	223 kDa	TRUE		unknown	2	0	0	0	1	4	0	0	1	12	3	0
25.2	TRUE	Empty	BA75_04917T0 OS=Komagataella pastoris OX=4922 GN=ATY40_BA7504917 PE=4 SV=1	A0A1B2JIC1_PICPA	224 kDa	TRUE		unknown	2	0	0	0	2	4	0	0	1	12	1	0
26	TRUE	Empty	Cluster of tr|A0A1B2J7U7|A0A1B2J7U7_PICPA-DECOY	tr|A0A1B2J7U7|A0A1B2J7U7_PICPA-DECOY [3]	?	TRUE		unknown	0	0	1	1	6	2	0	0	1	1	0	0
26.1	TRUE	Empty	tr|A0A1B2J7U7|A0A1B2J7U7_PICPA-DECOY	tr|A0A1B2J7U7|A0A1B2J7U7_PICPA-DECOY	?	TRUE		unknown	0	0	0	1	3	2	0	0	1	1	0	0
26.2	TRUE	Empty	tr|C4QWU5|C4QWU5_KOMPG-DECOY	tr|C4QWU5|C4QWU5_KOMPG-DECOY (+1)	?	TRUE		unknown	0	0	1	0	4	1	0	0	1	1	0	0
27	TRUE	Empty	Cluster of BA75_00956T0 OS=Komagataella pastoris OX=4922 GN=PRP22 PE=4 SV=1 (A0A1B2J5T4_PICPA)	A0A1B2J5T4_PICPA [3]	114 kDa	TRUE		unknown	1	0	2	3	5	5	0	1	0	5	0	0
27.1	TRUE	Empty	BA75_00956T0 OS=Komagataella pastoris OX=4922 GN=PRP22 PE=4 SV=1	A0A1B2J5T4_PICPA	114 kDa	TRUE		unknown	0	0	1	2	4	4	0	1	0	5	0	0
27.2	TRUE	Empty	DEAH-box RNA-dependent ATPase/ATP-dependent RNA helicase OS=Komagataella phaffii (strain GS115 / ATCC 20864) OX=644223 GN=PAS_chr1-4_0118 PE=4 SV=1	C4QXH4_KOMPG (+1)	114 kDa	TRUE		unknown	1	0	1	1	3	2	0	0	0	1	0	0
28	TRUE	Empty	Cluster of Transcription regulatory protein OS=Komagataella phaffii (strain ATCC 76273 / CBS 7435 / CECT 11047 / NRRL Y-11430 / Wegner 21-1) OX=981350 GN=SNF2 PE=4 SV=1 (F2QXS0_KOMPC)	F2QXS0_KOMPC [3]	189 kDa	TRUE		unknown	3	0	1	2	3	4	0	0	0	4	3	0
28.1	TRUE	Empty	Transcription regulatory protein OS=Komagataella phaffii (strain ATCC 76273 / CBS 7435 / CECT 11047 / NRRL Y-11430 / Wegner 21-1) OX=981350 GN=SNF2 PE=4 SV=1	F2QXS0_KOMPC (+1)	189 kDa	TRUE		unknown	3	0	1	1	2	4	0	0	0	2	2	0
28.2	TRUE	Empty	BA75_04408T0 OS=Komagataella pastoris OX=4922 GN=SNF2 PE=4 SV=1	A0A1B2JIY8_PICPA	189 kDa	TRUE		unknown	3	0	0	2	2	2	0	0	0	4	2	0
29	TRUE	Empty	Cluster of HECT-type E3 ubiquitin transferase OS=Komagataella pastoris OX=4922 GN=ATY40_BA7500036 PE=3 SV=1 (A0A1B2J6N1_PICPA)	A0A1B2J6N1_PICPA [3]	376 kDa	TRUE		unknown	4	0	3	0	5	5	0	0	3	1	1	0
29.1	TRUE	Empty	HECT-type E3 ubiquitin transferase OS=Komagataella pastoris OX=4922 GN=ATY40_BA7500036 PE=3 SV=1	A0A1B2J6N1_PICPA	376 kDa	TRUE		unknown	4	0	3	0	5	5	0	0	2	1	0	0
29.2	TRUE	Empty	HECT-type E3 ubiquitin transferase OS=Komagataella phaffii (strain GS115 / ATCC 20864) OX=644223 GN=PAS_chr3_0044 PE=3 SV=1	C4R3D7_KOMPG (+1)	376 kDa	TRUE		unknown	0	0	0	0	5	3	0	0	1	1	1	0
30	TRUE	Empty	Cytoplasmic heavy chain dynein, microtubule motor protein, required for anaphase spindle elongation OS=Komagataella phaffii (strain GS115 / ATCC 20864) OX=644223 GN=PAS_chr2-1_0744 PE=4 SV=1	C4R1M0_KOMPG	475 kDa	TRUE		unknown	2	0	1	0	2	2	0	0	3	5	2	0
31	TRUE	Empty	Cluster of tr|A0A1B2JE03|A0A1B2JE03_PICPA-DECOY	tr|A0A1B2JE03|A0A1B2JE03_PICPA-DECOY [3]	?	TRUE		unknown	2	0	3	1	2	2	0	0	0	2	0	0
31.1	TRUE	Empty	tr|A0A1B2JE03|A0A1B2JE03_PICPA-DECOY	tr|A0A1B2JE03|A0A1B2JE03_PICPA-DECOY	?	TRUE		unknown	2	0	3	0	1	2	0	0	0	2	0	0
31.2	TRUE	Empty	tr|C4R5C7|C4R5C7_KOMPG-DECOY	tr|C4R5C7|C4R5C7_KOMPG-DECOY (+1)	?	TRUE		unknown	2	0	2	1	2	2	0	0	0	1	0	0
32	TRUE	Empty	Cluster of tr|A0A1B2J9P1|A0A1B2J9P1_PICPA-DECOY	tr|A0A1B2J9P1|A0A1B2J9P1_PICPA-DECOY [3]	?	TRUE		unknown	0	0	1	2	4	1	0	0	0	1	0	0
32.1	TRUE	Empty	tr|A0A1B2J9P1|A0A1B2J9P1_PICPA-DECOY	tr|A0A1B2J9P1|A0A1B2J9P1_PICPA-DECOY	?	TRUE		unknown	0	0	1	1	3	1	0	0	0	0	0	0
32.2	TRUE	Empty	tr|C4QWF7|C4QWF7_KOMPG-DECOY	tr|C4QWF7|C4QWF7_KOMPG-DECOY (+1)	?	TRUE		unknown	0	0	1	2	3	1	0	0	0	1	0	0
33	TRUE	Empty	Cluster of Dihydroxyacetone synthase variant 2 OS=Komagataella phaffii (strain ATCC 76273 / CBS 7435 / CECT 11047 / NRRL Y-11430 / Wegner 21-1) OX=981350 GN=DAS2 PE=3 SV=1 (F2QV90_KOMPC)	F2QV90_KOMPC [4]	79 kDa	TRUE		unknown	12	10	1	4	6	2	12	25	9	8	8	12
33.1	TRUE	Empty	Dihydroxyacetone synthase variant 2 OS=Komagataella phaffii (strain ATCC 76273 / CBS 7435 / CECT 11047 / NRRL Y-11430 / Wegner 21-1) OX=981350 GN=DAS2 PE=3 SV=1	F2QV90_KOMPC	79 kDa	TRUE		unknown	9	8	0	0	0	1	9	19	4	7	5	10
33.2	TRUE	Empty	Dihydroxyacetone synthase variant 1 OS=Komagataella phaffii (strain ATCC 76273 / CBS 7435 / CECT 11047 / NRRL Y-11430 / Wegner 21-1) OX=981350 GN=DAS1 PE=3 SV=1	F2QV92_KOMPC	79 kDa	TRUE		unknown	7	8	1	2	4	1	7	14	4	5	4	8
33.3	TRUE	Empty	BA75_03691T0 OS=Komagataella pastoris OX=4922 GN=ATY40_BA7503691 PE=3 SV=1	A0A1B2JFH4_PICPA	79 kDa	TRUE		unknown	8	7	0	3	3	1	8	14	2	6	4	10
33.4	TRUE	Empty	BA75_03693T0 OS=Komagataella pastoris OX=4922 GN=ATY40_BA7503693 PE=3 SV=1	A0A1B2JGF9_PICPA	79 kDa	TRUE		unknown	7	8	1	2	3	0	7	14	4	4	3	8
34	TRUE	Empty	Cluster of DNA polymerase epsilon catalytic subunit OS=Komagataella pastoris OX=4922 GN=POL2 PE=3 SV=1 (A0A1B2JA06_PICPA)	A0A1B2JA06_PICPA [2]	255 kDa	TRUE		unknown	0	0	1	1	3	1	0	0	0	2	0	0
34.1	TRUE	Empty	DNA polymerase epsilon catalytic subunit OS=Komagataella pastoris OX=4922 GN=POL2 PE=3 SV=1	A0A1B2JA06_PICPA	255 kDa	TRUE		unknown	0	0	1	1	3	1	0	0	0	0	0	0
34.2	TRUE	Empty	DNA polymerase epsilon catalytic subunit OS=Komagataella phaffii (strain GS115 / ATCC 20864) OX=644223 GN=PAS_chr1-3_0083 PE=3 SV=1	C4QV66_KOMPG	255 kDa	TRUE		unknown	0	0	1	0	3	0	0	0	0	2	0	0
34.3	TRUE	Empty	DNA polymerase epsilon catalytic subunit OS=Komagataella phaffii (strain ATCC 76273 / CBS 7435 / CECT 11047 / NRRL Y-11430 / Wegner 21-1) OX=981350 GN=POL2 PE=3 SV=1	F2QLW0_KOMPC	206 kDa	TRUE		unknown	0	0	0	0	0	0	0	0	0	2	0	0
35	TRUE	Empty	Cluster of BA75_00786T0 OS=Komagataella pastoris OX=4922 GN=SSK2 PE=4 SV=1 (A0A1B2J6M3_PICPA)	A0A1B2J6M3_PICPA [2]	170 kDa	TRUE		unknown	0	0	0	2	2	4	0	1	1	4	1	0
35.1	TRUE	Empty	BA75_00786T0 OS=Komagataella pastoris OX=4922 GN=SSK2 PE=4 SV=1	A0A1B2J6M3_PICPA	170 kDa	TRUE		unknown	0	0	0	1	1	3	0	1	1	4	1	0
35.2	TRUE	Empty	MAP kinase kinase kinase OS=Komagataella phaffii (strain ATCC 76273 / CBS 7435 / CECT 11047 / NRRL Y-11430 / Wegner 21-1) OX=981350 GN=SSK22 PE=4 SV=1	F2QLF7_KOMPC	169 kDa	TRUE		unknown	0	0	0	2	2	3	0	1	0	3	1	0
36	TRUE	Empty	Cluster of Structural maintenance of chromosomes protein OS=Komagataella phaffii (strain GS115 / ATCC 20864) OX=644223 GN=PAS_chr1-4_0535 PE=4 SV=1 (C4QYR4_KOMPG)	C4QYR4_KOMPG [3]	123 kDa	TRUE		unknown	2	0	4	1	4	2	0	0	1	3	1	0
36.1	TRUE	Empty	Structural maintenance of chromosomes protein OS=Komagataella phaffii (strain GS115 / ATCC 20864) OX=644223 GN=PAS_chr1-4_0535 PE=4 SV=1	C4QYR4_KOMPG (+1)	123 kDa	TRUE		unknown	1	0	4	1	1	0	0	0	0	2	1	0
36.2	TRUE	Empty	BA75_04093T0 OS=Komagataella pastoris OX=4922 GN=SMC6 PE=4 SV=1	A0A1B2JG56_PICPA	123 kDa	TRUE		unknown	1	0	3	1	4	2	0	0	1	2	1	0
37	TRUE	Empty	Cluster of tr|C4R744|C4R744_KOMPG-DECOY	tr|C4R744|C4R744_KOMPG-DECOY [3]	?	TRUE		unknown	0	0	0	0	2	4	0	0	0	0	5	0
37.1	TRUE	Empty	tr|C4R744|C4R744_KOMPG-DECOY	tr|C4R744|C4R744_KOMPG-DECOY (+1)	?	TRUE		unknown	0	0	0	0	1	2	0	0	0	0	4	0
37.2	TRUE	Empty	tr|A0A1B2JDP6|A0A1B2JDP6_PICPA-DECOY	tr|A0A1B2JDP6|A0A1B2JDP6_PICPA-DECOY	?	TRUE		unknown	0	0	0	0	2	4	0	0	0	0	2	0
38	TRUE	Empty	Cluster of Cell wall protein with similarity to glucanases OS=Komagataella phaffii (strain GS115 / ATCC 20864) OX=644223 GN=PAS_chr1-3_0229 PE=3 SV=1 (C4QVL7_KOMPG)	C4QVL7_KOMPG [2]	36 kDa	TRUE		unknown	12	19	5	3	10	8	49	5	3	4	27	15
38.1	TRUE	Empty	Cell wall protein with similarity to glucanases OS=Komagataella phaffii (strain GS115 / ATCC 20864) OX=644223 GN=PAS_chr1-3_0229 PE=3 SV=1	C4QVL7_KOMPG (+1)	36 kDa	TRUE		unknown	12	19	5	3	10	8	49	5	3	4	27	15
38.2	TRUE	Empty	BA75_01624T0 OS=Komagataella pastoris OX=4922 GN=ATY40_BA7501624 PE=3 SV=1	A0A1B2J755_PICPA	36 kDa	TRUE		unknown	7	8	4	3	7	4	27	4	3	2	15	5
39	TRUE	Empty	Cluster of Phospholipase OS=Komagataella pastoris OX=4922 GN=SPO14 PE=3 SV=1 (A0A1B2JE39_PICPA)	A0A1B2JE39_PICPA [3]	197 kDa	TRUE		unknown	1	0	0	0	1	0	0	0	0	3	2	0
39.1	TRUE	Empty	Phospholipase OS=Komagataella pastoris OX=4922 GN=SPO14 PE=3 SV=1	A0A1B2JE39_PICPA	197 kDa	TRUE		unknown	1	0	0	0	1	0	0	0	0	2	1	0
39.2	TRUE	Empty	Phospholipase OS=Komagataella phaffii (strain GS115 / ATCC 20864) OX=644223 GN=PAS_chr3_0646 PE=3 SV=1	C4R558_KOMPG (+1)	196 kDa	TRUE		unknown	0	0	0	0	1	0	0	0	0	2	2	0
40	TRUE	Empty	tr|A0A1B2J896|A0A1B2J896_PICPA-DECOY	tr|A0A1B2J896|A0A1B2J896_PICPA-DECOY	?	TRUE		unknown	4	0	0	2	6	3	0	0	3	9	3	0
41	TRUE	Empty	Cluster of tr|C4QWL7|C4QWL7_KOMPG-DECOY	tr|C4QWL7|C4QWL7_KOMPG-DECOY [3]	?	TRUE		unknown	2	0	1	1	4	1	0	0	1	6	3	0
41.1	TRUE	Empty	tr|C4QWL7|C4QWL7_KOMPG-DECOY	tr|C4QWL7|C4QWL7_KOMPG-DECOY (+1)	?	TRUE		unknown	1	0	1	1	3	1	0	0	1	4	3	0
41.2	TRUE	Empty	tr|A0A1B2J5B8|A0A1B2J5B8_PICPA-DECOY	tr|A0A1B2J5B8|A0A1B2J5B8_PICPA-DECOY	?	TRUE		unknown	2	0	1	1	4	0	0	0	0	4	0	0
42	TRUE	Empty	Cluster of 1-phosphatidylinositol-3-phosphate 5-kinase OS=Komagataella pastoris OX=4922 GN=FAB1 PE=4 SV=1 (A0A1B2JFA0_PICPA)	A0A1B2JFA0_PICPA	226 kDa	TRUE		unknown	1	0	2	0	3	0	0	0	1	5	0	0
42.1	TRUE	Empty	1-phosphatidylinositol-3-phosphate 5-kinase OS=Komagataella pastoris OX=4922 GN=FAB1 PE=4 SV=1	A0A1B2JFA0_PICPA	226 kDa	TRUE		unknown	1	0	2	0	3	0	0	0	1	5	0	0
42.2	TRUE	Empty	1-phosphatidylinositol-3-phosphate 5-kinase OS=Komagataella phaffii (strain ATCC 76273 / CBS 7435 / CECT 11047 / NRRL Y-11430 / Wegner 21-1) OX=981350 GN=FAB1 PE=4 SV=1	F2QUZ5_KOMPC	226 kDa	TRUE		unknown	1	0	2	0	1	0	0	0	1	3	0	0
43	TRUE	Empty	Cluster of tr|A0A1B2J8D7|A0A1B2J8D7_PICPA-DECOY	tr|A0A1B2J8D7|A0A1B2J8D7_PICPA-DECOY [2]	?	TRUE		unknown	2	0	0	0	2	4	0	1	1	1	1	0
43.1	TRUE	Empty	tr|A0A1B2J8D7|A0A1B2J8D7_PICPA-DECOY	tr|A0A1B2J8D7|A0A1B2J8D7_PICPA-DECOY	?	TRUE		unknown	2	0	0	0	2	4	0	1	1	1	1	0
43.2	TRUE	Empty	tr|C4R475|C4R475_KOMPG-DECOY	tr|C4R475|C4R475_KOMPG-DECOY	?	TRUE		unknown	1	0	0	0	2	4	0	1	0	1	1	0
43.3	TRUE	Empty	tr|A0A1G4KQJ2|A0A1G4KQJ2_KOMPC-DECOY	tr|A0A1G4KQJ2|A0A1G4KQJ2_KOMPC-DECOY	?	TRUE		unknown	0	0	0	0	0	0	0	0	0	0	0	0
44	TRUE	Empty	Mitochondria-ER-cortex-ancor component OS=Komagataella phaffii (strain ATCC 76273 / CBS 7435 / CECT 11047 / NRRL Y-11430 / Wegner 21-1) OX=981350 GN=NUM1 PE=4 SV=1	F2QMY9_KOMPC	177 kDa	TRUE		unknown	2	0	2	1	3	1	0	0	0	2	2	0
45	TRUE	Empty	Cluster of Bud site selection protein 5 OS=Komagataella phaffii (strain ATCC 76273 / CBS 7435 / CECT 11047 / NRRL Y-11430 / Wegner 21-1) OX=981350 GN=BUD5 PE=4 SV=1 (F2QVS1_KOMPC)	F2QVS1_KOMPC [2]	181 kDa	TRUE		unknown	0	0	2	1	7	3	0	0	2	1	1	0
45.1	TRUE	Empty	Bud site selection protein 5 OS=Komagataella phaffii (strain ATCC 76273 / CBS 7435 / CECT 11047 / NRRL Y-11430 / Wegner 21-1) OX=981350 GN=BUD5 PE=4 SV=1	F2QVS1_KOMPC	181 kDa	TRUE		unknown	0	0	2	1	4	3	0	0	2	1	1	0
45.2	TRUE	Empty	BA75_03888T0 OS=Komagataella pastoris OX=4922 GN=BUD5 PE=4 SV=1	A0A1B2JF59_PICPA	181 kDa	TRUE		unknown	0	0	0	0	5	1	0	0	2	1	1	0
46	TRUE	Empty	tr|F2QMY9|F2QMY9_KOMPC-DECOY	tr|F2QMY9|F2QMY9_KOMPC-DECOY	?	TRUE		unknown	2	0	1	2	5	2	0	0	2	4	1	0
47	TRUE	Empty	Cluster of tr|A0A1B2JCI2|A0A1B2JCI2_PICPA-DECOY	tr|A0A1B2JCI2|A0A1B2JCI2_PICPA-DECOY [3]	?	TRUE		unknown	0	0	1	0	0	3	0	0	1	1	2	0
47.1	TRUE	Empty	tr|A0A1B2JCI2|A0A1B2JCI2_PICPA-DECOY	tr|A0A1B2JCI2|A0A1B2JCI2_PICPA-DECOY	?	TRUE		unknown	0	0	1	0	0	3	0	0	1	1	2	0
47.2	TRUE	Empty	tr|C4R117|C4R117_KOMPG-DECOY	tr|C4R117|C4R117_KOMPG-DECOY (+1)	?	TRUE		unknown	0	0	1	0	0	3	0	0	1	1	2	0
48	TRUE	Empty	Cluster of tr|A0A1B2JIY8|A0A1B2JIY8_PICPA-DECOY	tr|A0A1B2JIY8|A0A1B2JIY8_PICPA-DECOY [3]	?	TRUE		unknown	1	0	1	0	3	2	0	1	1	2	3	0
48.1	TRUE	Empty	tr|A0A1B2JIY8|A0A1B2JIY8_PICPA-DECOY	tr|A0A1B2JIY8|A0A1B2JIY8_PICPA-DECOY	?	TRUE		unknown	1	0	1	0	3	2	0	1	1	2	1	0
48.2	TRUE	Empty	tr|C4R9B5|C4R9B5_KOMPG-DECOY	tr|C4R9B5|C4R9B5_KOMPG-DECOY (+1)	?	TRUE		unknown	0	0	1	0	2	1	0	0	1	2	3	0
49	TRUE	Empty	BA75_04222T0 OS=Komagataella pastoris OX=4922 GN=SGF73 PE=4 SV=1	A0A1B2JH59_PICPA	75 kDa	TRUE		unknown	6	0	0	0	1	8	0	1	1	8	3	0
50	TRUE	Empty	Cluster of tr|A0A1B2JAV2|A0A1B2JAV2_PICPA-DECOY	tr|A0A1B2JAV2|A0A1B2JAV2_PICPA-DECOY [3]	?	TRUE		unknown	3	0	2	1	3	4	0	0	2	3	3	0
50.1	TRUE	Empty	tr|A0A1B2JAV2|A0A1B2JAV2_PICPA-DECOY	tr|A0A1B2JAV2|A0A1B2JAV2_PICPA-DECOY	?	TRUE		unknown	3	0	2	0	2	3	0	0	2	3	3	0
50.2	TRUE	Empty	tr|C4R232|C4R232_KOMPG-DECOY	tr|C4R232|C4R232_KOMPG-DECOY (+1)	?	TRUE		unknown	2	0	2	1	3	2	0	0	1	2	1	0
51	TRUE	Empty	Cluster of tr|A0A1B2JAH3|A0A1B2JAH3_PICPA-DECOY	tr|A0A1B2JAH3|A0A1B2JAH3_PICPA-DECOY [2]	?	TRUE		unknown	1	0	1	1	5	1	0	0	1	1	0	0
51.1	TRUE	Empty	tr|A0A1B2JAH3|A0A1B2JAH3_PICPA-DECOY	tr|A0A1B2JAH3|A0A1B2JAH3_PICPA-DECOY	?	TRUE		unknown	0	0	1	1	3	1	0	0	1	0	0	0
51.2	TRUE	Empty	tr|F2QQR5|F2QQR5_KOMPC-DECOY	tr|F2QQR5|F2QQR5_KOMPC-DECOY	?	TRUE		unknown	0	0	1	0	3	1	0	0	0	1	0	0
51.3	TRUE	Empty	tr|C4R315|C4R315_KOMPG-DECOY	tr|C4R315|C4R315_KOMPG-DECOY	?	TRUE		unknown	1	0	1	1	3	1	0	0	0	1	0	0
52	TRUE	Empty	Cluster of non-specific serine/threonine protein kinase OS=Komagataella pastoris OX=4922 GN=GIN4 PE=3 SV=1 (A0A1B2J7U7_PICPA)	A0A1B2J7U7_PICPA [3]	132 kDa	TRUE		unknown	0	0	2	0	0	2	0	1	2	4	0	0
52.1	TRUE	Empty	non-specific serine/threonine protein kinase OS=Komagataella pastoris OX=4922 GN=GIN4 PE=3 SV=1	A0A1B2J7U7_PICPA	132 kDa	TRUE		unknown	0	0	2	0	0	2	0	1	0	4	0	0
52.2	TRUE	Empty	non-specific serine/threonine protein kinase OS=Komagataella phaffii (strain GS115 / ATCC 20864) OX=644223 GN=PAS_chr1-1_0340 PE=3 SV=1	C4QWU5_KOMPG (+1)	132 kDa	TRUE		unknown	0	0	0	0	0	0	0	0	2	4	0	0
53	TRUE	Empty	Cluster of tr|A0A1B2JE39|A0A1B2JE39_PICPA-DECOY	tr|A0A1B2JE39|A0A1B2JE39_PICPA-DECOY [3]	?	TRUE		unknown	2	0	2	0	1	2	0	0	0	3	2	0
53.1	TRUE	Empty	tr|A0A1B2JE39|A0A1B2JE39_PICPA-DECOY	tr|A0A1B2JE39|A0A1B2JE39_PICPA-DECOY	?	TRUE		unknown	1	0	0	0	1	1	0	0	0	2	2	0
53.2	TRUE	Empty	tr|C4R558|C4R558_KOMPG-DECOY	tr|C4R558|C4R558_KOMPG-DECOY (+1)	?	TRUE		unknown	1	0	2	0	1	2	0	0	0	2	2	0
54	TRUE	Empty	Cluster of Transcription elongation factor Spt6 OS=Komagataella pastoris OX=4922 GN=SPT6 PE=3 SV=1 (A0A1B2JB08_PICPA)	A0A1B2JB08_PICPA [3]	173 kDa	TRUE		unknown	5	0	1	2	6	3	0	1	1	8	3	0
54.1	TRUE	Empty	Transcription elongation factor Spt6 OS=Komagataella pastoris OX=4922 GN=SPT6 PE=3 SV=1	A0A1B2JB08_PICPA	173 kDa	TRUE		unknown	5	0	0	0	3	3	0	1	1	7	2	0
54.2	TRUE	Empty	Transcription elongation factor Spt6 OS=Komagataella phaffii (strain GS115 / ATCC 20864) OX=644223 GN=PAS_chr4_0308 PE=1 SV=1	C4R7H2_KOMPG (+1)	173 kDa	TRUE		unknown	1	0	1	2	4	2	0	0	0	5	1	0
55	TRUE	Empty	BA75_01043T0 OS=Komagataella pastoris OX=4922 GN=ATY40_BA7501043 PE=4 SV=1	A0A1B2J896_PICPA	188 kDa	TRUE		unknown	3	0	0	0	3	0	0	0	1	1	2	0
56	TRUE	Empty	Cluster of BA75_04776T0 OS=Komagataella pastoris OX=4922 GN=RAD2 PE=3 SV=1 (A0A1B2JHC5_PICPA)	A0A1B2JHC5_PICPA [3]	120 kDa	TRUE		unknown	4	0	1	1	3	1	0	0	1	6	0	0
56.1	TRUE	Empty	BA75_04776T0 OS=Komagataella pastoris OX=4922 GN=RAD2 PE=3 SV=1	A0A1B2JHC5_PICPA	120 kDa	TRUE		unknown	3	0	1	1	3	1	0	0	1	4	0	0
56.2	TRUE	Empty	Single-stranded DNA endonuclease, cleaves single-stranded DNA during nucleotide excision repair OS=Komagataella phaffii (strain GS115 / ATCC 20864) OX=644223 GN=PAS_chr4_0555 PE=3 SV=1	C4R890_KOMPG (+1)	120 kDa	TRUE		unknown	1	0	0	0	2	0	0	0	1	5	0	0
57	TRUE	Empty	Cluster of BA75_02208T0 OS=Komagataella pastoris OX=4922 GN=GDE1 PE=4 SV=1 (A0A1B2JC94_PICPA)	A0A1B2JC94_PICPA [2]	146 kDa	TRUE		unknown	1	0	7	2	8	3	0	0	2	1	1	0
57.1	TRUE	Empty	BA75_02208T0 OS=Komagataella pastoris OX=4922 GN=GDE1 PE=4 SV=1	A0A1B2JC94_PICPA	146 kDa	TRUE		unknown	1	0	4	0	5	0	0	0	1	1	0	0
57.2	TRUE	Empty	Glycerophosphocholine phosphodiesterase OS=Komagataella phaffii (strain ATCC 76273 / CBS 7435 / CECT 11047 / NRRL Y-11430 / Wegner 21-1) OX=981350 GN=GDE1 PE=4 SV=1	F2QRK0_KOMPC	146 kDa	TRUE		unknown	1	0	5	2	6	3	0	0	1	0	1	0
57.3	TRUE	Empty	Glycerophosphocholine (GroPCho) phosphodiesterase OS=Komagataella phaffii (strain GS115 / ATCC 20864) OX=644223 GN=PAS_chr2-2_0314 PE=4 SV=1	C4R268_KOMPG	142 kDa	TRUE		unknown	1	0	5	1	6	3	0	0	1	0	1	0
58	TRUE	Empty	Cluster of Formate dehydrogenase OS=Komagataella pastoris OX=4922 GN=FDH1 PE=3 SV=1 (C1PHG6_PICPA)	C1PHG6_PICPA [3]	40 kDa	TRUE		unknown	5	2	0	0	4	2	21	13	3	3	9	28
58.1	TRUE	Empty	Formate dehydrogenase OS=Komagataella pastoris OX=4922 GN=FDH1 PE=3 SV=1	C1PHG6_PICPA (+2)	40 kDa	TRUE		unknown	5	2	0	0	4	2	21	13	3	3	9	28
58.2	TRUE	Empty	Formate dehydrogenase OS=Komagataella pastoris OX=4922 GN=FDH1 PE=3 SV=1	A0A1B2JGG7_PICPA	40 kDa	TRUE		unknown	0	0	0	0	0	0	18	0	0	0	0	27
59	TRUE	Empty	Cluster of tr|C4QV30|C4QV30_KOMPG-DECOY	tr|C4QV30|C4QV30_KOMPG-DECOY [2]	?	TRUE		unknown	1	0	4	1	2	1	0	0	1	1	0	0
59.1	TRUE	Empty	tr|C4QV30|C4QV30_KOMPG-DECOY	tr|C4QV30|C4QV30_KOMPG-DECOY (+1)	?	TRUE		unknown	1	0	4	1	2	1	0	0	1	1	0	0
59.2	TRUE	Empty	tr|A0A1B2J8P9|A0A1B2J8P9_PICPA-DECOY	tr|A0A1B2J8P9|A0A1B2J8P9_PICPA-DECOY	?	TRUE		unknown	1	0	1	1	2	1	0	0	1	0	0	0
60	TRUE	Empty	Cluster of Elongator complex protein 1 OS=Komagataella phaffii (strain GS115 / ATCC 20864) OX=644223 GN=PAS_chr2-2_0263 PE=3 SV=1 (C4R2C6_KOMPG)	C4R2C6_KOMPG [3]	148 kDa	TRUE		unknown	0	0	0	2	0	0	0	0	1	7	0	0
60.1	TRUE	Empty	Elongator complex protein 1 OS=Komagataella phaffii (strain GS115 / ATCC 20864) OX=644223 GN=PAS_chr2-2_0263 PE=3 SV=1	C4R2C6_KOMPG (+1)	148 kDa	TRUE		unknown	0	0	0	2	0	0	0	0	1	6	0	0
60.2	TRUE	Empty	Elongator complex protein 1 OS=Komagataella pastoris OX=4922 GN=IKI3 PE=3 SV=1	A0A1B2JCQ7_PICPA	148 kDa	TRUE		unknown	0	0	0	2	0	0	0	0	1	4	0	0
61	TRUE	Empty	Cluster of Structural maintenance of chromosomes protein 5 OS=Komagataella pastoris OX=4922 GN=SMC5 PE=3 SV=1 (A0A1B2J9I4_PICPA)	A0A1B2J9I4_PICPA [3]	127 kDa	TRUE		unknown	0	0	3	0	2	2	0	0	0	4	3	0
61.1	TRUE	Empty	Structural maintenance of chromosomes protein 5 OS=Komagataella pastoris OX=4922 GN=SMC5 PE=3 SV=1	A0A1B2J9I4_PICPA	127 kDa	TRUE		unknown	0	0	2	0	2	2	0	0	0	3	2	0
61.2	TRUE	Empty	Structural maintenance of chromosomes protein 5 OS=Komagataella phaffii (strain GS115 / ATCC 20864) OX=644223 GN=PAS_chr1-1_0245 PE=3 SV=1	C4QWJ2_KOMPG (+1)	128 kDa	TRUE		unknown	0	0	1	0	2	1	0	0	0	1	2	0
62	TRUE	Empty	tr|C4R1M0|C4R1M0_KOMPG-DECOY	tr|C4R1M0|C4R1M0_KOMPG-DECOY	?	TRUE		unknown	2	0	1	1	4	1	0	1	1	3	2	0
63	TRUE	Empty	Cluster of BA75_00816T0 OS=Komagataella pastoris OX=4922 GN=ACC1 PE=4 SV=1 (A0A1B2J685_PICPA)	A0A1B2J685_PICPA	254 kDa	TRUE		unknown	0	0	1	1	1	4	0	1	2	5	3	0
63.1	TRUE	Empty	BA75_00816T0 OS=Komagataella pastoris OX=4922 GN=ACC1 PE=4 SV=1	A0A1B2J685_PICPA	254 kDa	TRUE		unknown	0	0	1	1	1	4	0	1	2	3	3	0
63.2	TRUE	Empty	Acetyl-CoA carboxylase, biotin containing enzyme OS=Komagataella phaffii (strain GS115 / ATCC 20864) OX=644223 GN=PAS_chr1-4_0249 PE=4 SV=1	C4QXW1_KOMPG	248 kDa	TRUE		unknown	0	0	1	1	1	1	0	1	1	2	0	0
64	TRUE	Empty	Cluster of tr|A0A1B2JDN6|A0A1B2JDN6_PICPA-DECOY	tr|A0A1B2JDN6|A0A1B2JDN6_PICPA-DECOY [3]	?	TRUE		unknown	1	0	0	0	2	4	0	0	1	2	1	0
64.1	TRUE	Empty	tr|A0A1B2JDN6|A0A1B2JDN6_PICPA-DECOY	tr|A0A1B2JDN6|A0A1B2JDN6_PICPA-DECOY	?	TRUE		unknown	1	0	0	0	2	3	0	0	1	1	0	0
64.2	TRUE	Empty	tr|C4R6Z4|C4R6Z4_KOMPG-DECOY	tr|C4R6Z4|C4R6Z4_KOMPG-DECOY (+1)	?	TRUE		unknown	0	0	0	0	0	3	0	0	1	1	1	0
65	TRUE	Empty	Cluster of tr|A0A1B2JDR2|A0A1B2JDR2_PICPA-DECOY	tr|A0A1B2JDR2|A0A1B2JDR2_PICPA-DECOY [2]	?	TRUE		unknown	0	0	0	0	5	4	0	0	0	1	5	0
65.1	TRUE	Empty	tr|A0A1B2JDR2|A0A1B2JDR2_PICPA-DECOY	tr|A0A1B2JDR2|A0A1B2JDR2_PICPA-DECOY	?	TRUE		unknown	0	0	0	0	5	4	0	0	0	1	5	0
65.2	TRUE	Empty	tr|F2R071|F2R071_KOMPC-DECOY	tr|F2R071|F2R071_KOMPC-DECOY	?	TRUE		unknown	0	0	0	0	2	1	0	0	0	1	3	0
66	TRUE	Empty	Cluster of tr|F2QLM0|F2QLM0_KOMPC-DECOY	tr|F2QLM0|F2QLM0_KOMPC-DECOY [2]	?	TRUE		unknown	3	0	3	1	1	2	0	1	4	7	1	0
66.1	TRUE	Empty	tr|F2QLM0|F2QLM0_KOMPC-DECOY	tr|F2QLM0|F2QLM0_KOMPC-DECOY	?	TRUE		unknown	3	0	3	0	1	2	0	1	3	5	1	0
66.2	TRUE	Empty	tr|A0A1B2J9P8|A0A1B2J9P8_PICPA-DECOY	tr|A0A1B2J9P8|A0A1B2J9P8_PICPA-DECOY	?	TRUE		unknown	3	0	2	1	0	1	0	1	2	5	1	0
67	TRUE	Empty	tr|C4QYP1|C4QYP1_KOMPG-DECOY	tr|C4QYP1|C4QYP1_KOMPG-DECOY (+1)	?			unknown	0	1	2	1	0	1	0	0	0	7	1	0
68	TRUE	Empty	Cluster of tr|C4R821|C4R821_KOMPG-DECOY	tr|C4R821|C4R821_KOMPG-DECOY	?	TRUE		unknown	3	0	1	1	0	1	0	0	0	7	2	0
68.1	TRUE	Empty	tr|C4R821|C4R821_KOMPG-DECOY	tr|C4R821|C4R821_KOMPG-DECOY	?	TRUE		unknown	3	0	1	1	0	1	0	0	0	7	2	0
68.2	TRUE	Empty	tr|A0A1B2JIQ5|A0A1B2JIQ5_PICPA-DECOY	tr|A0A1B2JIQ5|A0A1B2JIQ5_PICPA-DECOY	?	TRUE		unknown	2	0	1	1	0	1	0	0	0	2	1	0
69	TRUE	Empty	Cluster of Uncharacterized protein OS=Komagataella phaffii (strain GS115 / ATCC 20864) OX=644223 GN=PAS_c121_0004 PE=4 SV=1 (C4QZ42_KOMPG)	C4QZ42_KOMPG [3]	138 kDa	TRUE		unknown	1	0	2	1	4	3	0	0	0	2	1	0
69.1	TRUE	Empty	Uncharacterized protein OS=Komagataella phaffii (strain GS115 / ATCC 20864) OX=644223 GN=PAS_c121_0004 PE=4 SV=1	C4QZ42_KOMPG (+1)	138 kDa	TRUE		unknown	1	0	2	0	2	3	0	0	0	1	0	0
69.2	TRUE	Empty	BA75_04226T0 OS=Komagataella pastoris OX=4922 GN=MHP1 PE=4 SV=1	A0A1B2JH41_PICPA	138 kDa	TRUE		unknown	1	0	1	1	3	2	0	0	0	2	1	0
70	TRUE	Empty	Cluster of DNA-directed RNA polymerase subunit OS=Komagataella phaffii (strain GS115 / ATCC 20864) OX=644223 GN=PAS_chr2-2_0387 PE=3 SV=1 (C4R1Z5_KOMPG)	C4R1Z5_KOMPG [2]	184 kDa	TRUE		unknown	3	0	1	1	1	2	0	0	0	1	0	0
70.1	TRUE	Empty	DNA-directed RNA polymerase subunit OS=Komagataella phaffii (strain GS115 / ATCC 20864) OX=644223 GN=PAS_chr2-2_0387 PE=3 SV=1	C4R1Z5_KOMPG (+1)	184 kDa	TRUE		unknown	3	0	0	1	0	2	0	0	0	1	0	0
70.2	TRUE	Empty	DNA-directed RNA polymerase subunit OS=Komagataella pastoris OX=4922 GN=RPA190 PE=3 SV=1	A0A1B2JB31_PICPA	183 kDa	TRUE		unknown	1	0	1	0	1	1	0	0	0	1	0	0
71	TRUE	Empty	Cluster of Phosphatidylinositol 4-kinase OS=Komagataella phaffii (strain GS115 / ATCC 20864) OX=644223 GN=PAS_chr1-4_0380 PE=4 SV=1 (C4QYA2_KOMPG)	C4QYA2_KOMPG [4]	115 kDa	TRUE		unknown	1	0	1	0	2	0	0	0	0	3	0	0
71.1	TRUE	Empty	Phosphatidylinositol 4-kinase OS=Komagataella phaffii (strain GS115 / ATCC 20864) OX=644223 GN=PAS_chr1-4_0380 PE=4 SV=1	C4QYA2_KOMPG (+2)	115 kDa	TRUE		unknown	1	0	1	0	2	0	0	0	0	2	0	0
71.2	TRUE	Empty	BA75_00675T0 OS=Komagataella pastoris OX=4922 GN=PIK1 PE=4 SV=1	A0A1B2J9V5_PICPA	115 kDa	TRUE		unknown	1	0	1	0	1	0	0	0	0	3	0	0
72	TRUE	Empty	Cluster of tr|A0A1B2J8J7|A0A1B2J8J7_PICPA-DECOY	tr|A0A1B2J8J7|A0A1B2J8J7_PICPA-DECOY [3]	?	TRUE		unknown	2	0	1	0	2	4	0	1	2	0	0	0
72.1	TRUE	Empty	tr|A0A1B2J8J7|A0A1B2J8J7_PICPA-DECOY	tr|A0A1B2J8J7|A0A1B2J8J7_PICPA-DECOY	?	TRUE		unknown	2	0	0	0	1	4	0	1	2	0	0	0
72.2	TRUE	Empty	tr|C4QVE7|C4QVE7_KOMPG-DECOY	tr|C4QVE7|C4QVE7_KOMPG-DECOY (+1)	?	TRUE		unknown	2	0	1	0	1	3	0	0	1	0	0	0
73	TRUE	Empty	Cluster of tr|A0A1B2JGT9|A0A1B2JGT9_PICPA-DECOY	tr|A0A1B2JGT9|A0A1B2JGT9_PICPA-DECOY	?	TRUE		unknown	1	0	0	2	1	1	0	0	0	1	0	0
73.1	TRUE	Empty	tr|A0A1B2JGT9|A0A1B2JGT9_PICPA-DECOY	tr|A0A1B2JGT9|A0A1B2JGT9_PICPA-DECOY	?	TRUE		unknown	1	0	0	2	1	1	0	0	0	1	0	0
73.2	TRUE	Empty	tr|F2QYJ5|F2QYJ5_KOMPC-DECOY	tr|F2QYJ5|F2QYJ5_KOMPC-DECOY	?	TRUE		unknown	1	0	0	0	0	0	0	0	0	0	0	0
73.3	TRUE	Empty	tr|C4R8K1|C4R8K1_KOMPG-DECOY	tr|C4R8K1|C4R8K1_KOMPG-DECOY	?	TRUE		unknown	1	0	0	2	0	0	0	0	0	0	0	0
74	TRUE	Empty	Cluster of Lysophospholipase NTE1 OS=Komagataella pastoris OX=4922 GN=NTE1 PE=3 SV=1 (A0A1B2J935_PICPA)	A0A1B2J935_PICPA [3]	165 kDa	TRUE		unknown	1	0	2	0	3	1	0	0	1	0	0	0
74.1	TRUE	Empty	Lysophospholipase NTE1 OS=Komagataella pastoris OX=4922 GN=NTE1 PE=3 SV=1	A0A1B2J935_PICPA	165 kDa	TRUE		unknown	0	0	2	0	1	1	0	0	0	0	0	0
74.2	TRUE	Empty	Lysophospholipase NTE1 OS=Komagataella phaffii (strain GS115 / ATCC 20864) OX=644223 GN=PAS_chr1-1_0009 PE=3 SV=1	C4QVT9_KOMPG (+1)	165 kDa	TRUE		unknown	1	0	1	0	3	1	0	0	1	0	0	0
75	TRUE	Empty	BA75_03704T0 OS=Komagataella pastoris OX=4922 GN=MYO1 PE=3 SV=1	A0A1B2JE98_PICPA	214 kDa	TRUE		unknown	0	0	4	0	6	3	0	0	2	2	2	0
76	TRUE	Empty	tr|A0A1B2J9C0|A0A1B2J9C0_PICPA-DECOY	tr|A0A1B2J9C0|A0A1B2J9C0_PICPA-DECOY	?	TRUE		unknown	2	0	0	2	4	2	0	1	0	5	1	1
77	TRUE	Empty	Cluster of DNA topoisomerase 2 OS=Komagataella pastoris OX=4922 GN=TOP2 PE=3 SV=1 (A0A1B2J8D7_PICPA)	A0A1B2J8D7_PICPA	149 kDa	TRUE		unknown	3	0	3	2	1	1	0	0	1	2	0	0
77.1	TRUE	Empty	DNA topoisomerase 2 OS=Komagataella pastoris OX=4922 GN=TOP2 PE=3 SV=1	A0A1B2J8D7_PICPA	149 kDa	TRUE		unknown	2	0	3	1	1	1	0	0	0	2	0	0
77.2	TRUE	Empty	DNA topoisomerase 2 OS=Komagataella phaffii (strain GS115 / ATCC 20864) OX=644223 GN=PAS_chr3_0322 PE=3 SV=1	C4R475_KOMPG	153 kDa	TRUE		unknown	1	0	3	2	1	1	0	0	1	2	0	0
77.3	TRUE	Empty	DNA topoisomerase 2 OS=Komagataella phaffii (strain ATCC 76273 / CBS 7435 / CECT 11047 / NRRL Y-11430 / Wegner 21-1) OX=981350 GN=TOP2 PE=3 SV=1	F2QWR7_KOMPC	149 kDa	TRUE		unknown	1	0	0	0	0	0	0	0	1	0	0	0
78	TRUE	Empty	Cluster of Alcohol oxidase 1 OS=Komagataella phaffii (strain ATCC 76273 / CBS 7435 / CECT 11047 / NRRL Y-11430 / Wegner 21-1) OX=981350 GN=AOX1 PE=1 SV=1 (ALOX1_KOMPC)	ALOX1_KOMPC [2]	74 kDa	TRUE		unknown	2	20	0	0	1	2	7	6	2	10	21	9
78.1	TRUE	Empty	Alcohol oxidase 1 OS=Komagataella phaffii (strain ATCC 76273 / CBS 7435 / CECT 11047 / NRRL Y-11430 / Wegner 21-1) OX=981350 GN=AOX1 PE=1 SV=1	ALOX1_KOMPC (+1)	74 kDa	TRUE		unknown	1	20	0	0	1	2	7	6	2	10	21	9
78.2	TRUE	Empty	Alcohol oxidase 2 OS=Komagataella phaffii (strain ATCC 76273 / CBS 7435 / CECT 11047 / NRRL Y-11430 / Wegner 21-1) OX=981350 GN=AOX2 PE=2 SV=1	ALOX2_KOMPC (+1)	74 kDa	TRUE		unknown	2	19	0	0	1	2	6	6	2	9	17	8
78.3	TRUE	Empty	alcohol oxidase OS=Komagataella pastoris OX=4922 GN=ATY40_BA7503165 PE=3 SV=1	A0A1B2JBK5_PICPA	74 kDa	TRUE		unknown	2	19	0	0	0	2	6	6	2	9	17	8
79	TRUE	Empty	BA75_02977T0 OS=Komagataella pastoris OX=4922 GN=MLP1 PE=4 SV=1	A0A1B2JDD4_PICPA	193 kDa	TRUE		unknown	2	0	3	0	8	6	0	0	1	4	1	0
80	TRUE	Empty	Cluster of BA75_03201T0 OS=Komagataella pastoris OX=4922 GN=TAO3 PE=4 SV=1 (A0A1B2JDR2_PICPA)	A0A1B2JDR2_PICPA	294 kDa	TRUE		unknown	2	0	1	1	2	3	0	0	3	5	0	0
80.1	TRUE	Empty	BA75_03201T0 OS=Komagataella pastoris OX=4922 GN=TAO3 PE=4 SV=1	A0A1B2JDR2_PICPA	294 kDa	TRUE		unknown	2	0	1	1	2	3	0	0	2	5	0	0
80.2	TRUE	Empty	Protein involved in cell morphogenesis and proliferation, associated with protein kinase Cbk1p OS=Komagataella phaffii (strain GS115 / ATCC 20864) OX=644223 GN=PAS_chr4_0119 PE=4 SV=1	C4R6X0_KOMPG	292 kDa	TRUE		unknown	1	0	0	1	1	1	0	0	2	3	0	0
80.3	TRUE	Empty	RAM signaling network component OS=Komagataella phaffii (strain ATCC 76273 / CBS 7435 / CECT 11047 / NRRL Y-11430 / Wegner 21-1) OX=981350 GN=TAO3 PE=4 SV=1	F2R071_KOMPC	294 kDa	TRUE		unknown	0	0	0	0	0	1	0	0	2	3	0	0
81	TRUE	Empty	Cluster of tr|C4R289|C4R289_KOMPG-DECOY	tr|C4R289|C4R289_KOMPG-DECOY [3]	?	TRUE		unknown	2	0	1	7	2	1	0	0	0	1	0	0
81.1	TRUE	Empty	tr|C4R289|C4R289_KOMPG-DECOY	tr|C4R289|C4R289_KOMPG-DECOY (+1)	?	TRUE		unknown	1	0	1	6	2	1	0	0	0	1	0	0
81.2	TRUE	Empty	tr|A0A1B2JD77|A0A1B2JD77_PICPA-DECOY	tr|A0A1B2JD77|A0A1B2JD77_PICPA-DECOY	?	TRUE		unknown	1	0	0	2	1	1	0	0	0	1	0	0
82	TRUE	Empty	Cluster of Serine/threonine-protein kinase TOR OS=Komagataella pastoris OX=4922 GN=TOR2 PE=3 SV=1 (A0A1B2JCI2_PICPA)	A0A1B2JCI2_PICPA [3]	276 kDa	TRUE		unknown	2	0	1	0	0	2	0	0	2	6	0	0
82.1	TRUE	Empty	Serine/threonine-protein kinase TOR OS=Komagataella pastoris OX=4922 GN=TOR2 PE=3 SV=1	A0A1B2JCI2_PICPA	276 kDa	TRUE		unknown	2	0	1	0	0	2	0	0	2	6	0	0
82.2	TRUE	Empty	Serine/threonine-protein kinase TOR OS=Komagataella phaffii (strain GS115 / ATCC 20864) OX=644223 GN=PAS_chr2-1_0557 PE=3 SV=1	C4R117_KOMPG (+1)	276 kDa	TRUE		unknown	2	0	1	0	0	2	0	0	2	6	0	0
83	TRUE	Empty	Cluster of Structural maintenance of chromosomes protein OS=Komagataella phaffii (strain GS115 / ATCC 20864) OX=644223 GN=PAS_chr2-1_0082 PE=3 SV=1 (C4QZK9_KOMPG)	C4QZK9_KOMPG [3]	140 kDa	TRUE		unknown	0	0	0	1	1	3	0	0	0	2	0	0
83.1	TRUE	Empty	Structural maintenance of chromosomes protein OS=Komagataella phaffii (strain GS115 / ATCC 20864) OX=644223 GN=PAS_chr2-1_0082 PE=3 SV=1	C4QZK9_KOMPG (+1)	140 kDa	TRUE		unknown	0	0	0	1	1	2	0	0	0	1	0	0
83.2	TRUE	Empty	Structural maintenance of chromosomes protein OS=Komagataella pastoris OX=4922 GN=SMC1 PE=3 SV=1	A0A1B2JHK5_PICPA	140 kDa	TRUE		unknown	0	0	0	1	1	2	0	0	0	2	0	0
84	TRUE	Empty	Cluster of tr|A0A1B2JG55|A0A1B2JG55_PICPA-DECOY	tr|A0A1B2JG55|A0A1B2JG55_PICPA-DECOY [3]	?	TRUE		unknown	1	0	1	2	2	1	0	0	0	3	0	0
84.1	TRUE	Empty	tr|A0A1B2JG55|A0A1B2JG55_PICPA-DECOY	tr|A0A1B2JG55|A0A1B2JG55_PICPA-DECOY	?	TRUE		unknown	1	0	0	1	2	1	0	0	0	3	0	0
84.2	TRUE	Empty	tr|C4R5R1|C4R5R1_KOMPG-DECOY	tr|C4R5R1|C4R5R1_KOMPG-DECOY (+1)	?	TRUE		unknown	0	0	1	2	0	0	0	0	0	0	0	0
85	TRUE	Empty	Cluster of BA75_03175T0 OS=Komagataella pastoris OX=4922 GN=SWR1 PE=4 SV=1 (A0A1B2JDN6_PICPA)	A0A1B2JDN6_PICPA	182 kDa	TRUE		unknown	1	0	2	1	5	3	0	0	1	0	0	0
85.1	TRUE	Empty	BA75_03175T0 OS=Komagataella pastoris OX=4922 GN=SWR1 PE=4 SV=1	A0A1B2JDN6_PICPA	182 kDa	TRUE		unknown	1	0	2	0	4	3	0	0	1	0	0	0
85.2	TRUE	Empty	Swi2/Snf2-related ATPase that is the structural component of the SWR1 complex OS=Komagataella phaffii (strain GS115 / ATCC 20864) OX=644223 GN=PAS_chr4_0143 PE=4 SV=1	C4R6Z4_KOMPG (+1)	182 kDa	TRUE		unknown	1	0	2	1	3	3	0	0	0	0	0	0
86	TRUE	Empty	Cluster of tr|F2QQV2|F2QQV2_KOMPC-DECOY	tr|F2QQV2|F2QQV2_KOMPC-DECOY [2]	?	TRUE		unknown	0	0	3	1	2	1	0	0	0	0	1	0
86.1	TRUE	Empty	tr|F2QQV2|F2QQV2_KOMPC-DECOY	tr|F2QQV2|F2QQV2_KOMPC-DECOY	?	TRUE		unknown	0	0	1	0	2	0	0	0	0	0	0	0
86.2	TRUE	Empty	tr|A0A1B2JC62|A0A1B2JC62_PICPA-DECOY	tr|A0A1B2JC62|A0A1B2JC62_PICPA-DECOY	?	TRUE		unknown	0	0	3	1	1	1	0	0	0	0	1	0
87	TRUE	Empty	Cluster of tr|A0A1B2J6J3|A0A1B2J6J3_PICPA-DECOY	tr|A0A1B2J6J3|A0A1B2J6J3_PICPA-DECOY	?	TRUE		unknown	3	0	0	1	2	4	0	0	0	2	2	0
87.1	TRUE	Empty	tr|A0A1B2J6J3|A0A1B2J6J3_PICPA-DECOY	tr|A0A1B2J6J3|A0A1B2J6J3_PICPA-DECOY	?	TRUE		unknown	3	0	0	1	2	2	0	0	0	2	2	0
87.2	TRUE	Empty	tr|C4QY10|C4QY10_KOMPG-DECOY	tr|C4QY10|C4QY10_KOMPG-DECOY (+1)	?	TRUE		unknown	2	0	0	1	1	2	0	0	0	0	2	0
88	TRUE	Empty	Cluster of Autophagy-related protein 9 OS=Komagataella pastoris OX=4922 GN=ATG9 PE=3 SV=1 (A0A1B2JHU8_PICPA)	A0A1B2JHU8_PICPA [4]	103 kDa	TRUE		unknown	0	0	4	0	6	0	0	0	0	4	1	0
88.1	TRUE	Empty	Autophagy-related protein 9 OS=Komagataella pastoris OX=4922 GN=ATG9 PE=3 SV=1	A0A1B2JHU8_PICPA	103 kDa	TRUE		unknown	0	0	1	0	3	0	0	0	0	1	1	0
88.2	TRUE	Empty	Autophagy-related protein 9 OS=Komagataella pastoris OX=4922 GN=ATG9 PE=3 SV=1	ATG9_PICPA (+2)	103 kDa	TRUE		unknown	0	0	3	0	4	0	0	0	0	3	0	0
89	TRUE	Empty	Cluster of DNA polymerase OS=Komagataella pastoris OX=4922 GN=POL1 PE=3 SV=1 (A0A1B2JAV2_PICPA)	A0A1B2JAV2_PICPA [3]	162 kDa	TRUE		unknown	0	0	1	0	2	2	0	0	1	5	1	0
89.1	TRUE	Empty	DNA polymerase OS=Komagataella pastoris OX=4922 GN=POL1 PE=3 SV=1	A0A1B2JAV2_PICPA	162 kDa	TRUE		unknown	0	0	0	0	2	2	0	0	1	4	0	0
89.2	TRUE	Empty	DNA polymerase OS=Komagataella phaffii (strain GS115 / ATCC 20864) OX=644223 GN=PAS_chr2-2_0349 PE=3 SV=1	C4R232_KOMPG (+1)	162 kDa	TRUE		unknown	0	0	1	0	2	1	0	0	0	2	1	0
90	TRUE	Empty	Myosin-like protein associated with the nuclear envelope OS=Komagataella phaffii (strain GS115 / ATCC 20864) OX=644223 GN=PAS_chr4_0316 PE=4 SV=1	C4R7I3_KOMPG (+1)	193 kDa	TRUE		unknown	1	0	3	0	7	3	0	0	2	10	2	0
91	TRUE	Empty	Cluster of tr|A0A1B2JC58|A0A1B2JC58_PICPA-DECOY	tr|A0A1B2JC58|A0A1B2JC58_PICPA-DECOY [3]	?	TRUE		unknown	0	0	0	0	0	4	0	0	0	6	2	0
91.1	TRUE	Empty	tr|A0A1B2JC58|A0A1B2JC58_PICPA-DECOY	tr|A0A1B2JC58|A0A1B2JC58_PICPA-DECOY	?	TRUE		unknown	0	0	0	0	0	2	0	0	0	5	1	0
91.2	TRUE	Empty	tr|C4R0R2|C4R0R2_KOMPG-DECOY	tr|C4R0R2|C4R0R2_KOMPG-DECOY (+1)	?	TRUE		unknown	0	0	0	0	0	2	0	0	0	3	1	0
92	TRUE	Empty	Cluster of tr|A0A1B2JCZ4|A0A1B2JCZ4_PICPA-DECOY	tr|A0A1B2JCZ4|A0A1B2JCZ4_PICPA-DECOY [3]	?	TRUE		unknown	0	0	1	0	4	1	0	0	1	3	2	0
92.1	TRUE	Empty	tr|A0A1B2JCZ4|A0A1B2JCZ4_PICPA-DECOY	tr|A0A1B2JCZ4|A0A1B2JCZ4_PICPA-DECOY	?	TRUE		unknown	0	0	1	0	2	1	0	0	1	3	1	0
92.2	TRUE	Empty	tr|C4R6S7|C4R6S7_KOMPG-DECOY	tr|C4R6S7|C4R6S7_KOMPG-DECOY (+1)	?	TRUE		unknown	0	0	1	0	3	0	0	0	1	3	2	0
93	TRUE	Empty	Cluster of tr|C4QWJ2|C4QWJ2_KOMPG-DECOY	tr|C4QWJ2|C4QWJ2_KOMPG-DECOY [3]	?	TRUE		unknown	3	0	0	0	5	7	0	0	2	1	0	0
93.1	TRUE	Empty	tr|C4QWJ2|C4QWJ2_KOMPG-DECOY	tr|C4QWJ2|C4QWJ2_KOMPG-DECOY (+1)	?	TRUE		unknown	1	0	0	0	3	3	0	0	1	1	0	0
93.2	TRUE	Empty	tr|A0A1B2J9I4|A0A1B2J9I4_PICPA-DECOY	tr|A0A1B2J9I4|A0A1B2J9I4_PICPA-DECOY	?	TRUE		unknown	2	0	0	0	2	6	0	0	1	0	0	0
94	TRUE	Empty	Cluster of tr|A0A1B2J8L8|A0A1B2J8L8_PICPA-DECOY	tr|A0A1B2J8L8|A0A1B2J8L8_PICPA-DECOY [3]	?	TRUE		unknown	3	0	0	0	3	2	0	0	0	1	0	0
94.1	TRUE	Empty	tr|A0A1B2J8L8|A0A1B2J8L8_PICPA-DECOY	tr|A0A1B2J8L8|A0A1B2J8L8_PICPA-DECOY	?	TRUE		unknown	3	0	0	0	2	2	0	0	0	1	0	0
94.2	TRUE	Empty	tr|C4R3P1|C4R3P1_KOMPG-DECOY	tr|C4R3P1|C4R3P1_KOMPG-DECOY (+1)	?	TRUE		unknown	1	0	0	0	3	2	0	0	0	1	0	0
95	TRUE	Empty	Cluster of tr|C4QY13|C4QY13_KOMPG-DECOY	tr|C4QY13|C4QY13_KOMPG-DECOY [4]	?	TRUE		unknown	3	0	1	0	1	4	0	0	2	4	0	0
95.1	TRUE	Empty	tr|C4QY13|C4QY13_KOMPG-DECOY	tr|C4QY13|C4QY13_KOMPG-DECOY (+2)	?	TRUE		unknown	2	0	1	0	0	2	0	0	2	4	0	0
95.2	TRUE	Empty	tr|A0A1B2J9J4|A0A1B2J9J4_PICPA-DECOY	tr|A0A1B2J9J4|A0A1B2J9J4_PICPA-DECOY	?	TRUE		unknown	3	0	1	0	1	3	0	0	2	4	0	0
96	TRUE	Empty	Cluster of tr|C4R014|C4R014_KOMPG-DECOY	tr|C4R014|C4R014_KOMPG-DECOY	?	TRUE		unknown	0	0	0	1	4	0	0	0	2	0	0	0
96.1	TRUE	Empty	tr|C4R014|C4R014_KOMPG-DECOY	tr|C4R014|C4R014_KOMPG-DECOY	?	TRUE		unknown	0	0	0	1	4	0	0	0	2	0	0	0
96.2	TRUE	Empty	tr|A0A1G4KQ33|A0A1G4KQ33_KOMPC-DECOY	tr|A0A1G4KQ33|A0A1G4KQ33_KOMPC-DECOY	?	TRUE		unknown	0	0	0	0	0	0	0	0	0	0	0	0
97	TRUE	Empty	Cluster of DNA-directed RNA polymerase subunit OS=Komagataella pastoris OX=4922 GN=RPO21 PE=3 SV=1 (A0A1B2J8C6_PICPA)	A0A1B2J8C6_PICPA	194 kDa	TRUE		unknown	2	0	0	0	1	2	0	0	2	2	0	0
97.1	TRUE	Empty	DNA-directed RNA polymerase subunit OS=Komagataella pastoris OX=4922 GN=RPO21 PE=3 SV=1	A0A1B2J8C6_PICPA	194 kDa	TRUE		unknown	1	0	0	0	1	2	0	0	2	2	0	0
97.2	TRUE	Empty	DNA-directed RNA polymerase subunit OS=Komagataella phaffii (strain GS115 / ATCC 20864) OX=644223 GN=PAS_chr3_0568 PE=1 SV=1	C4R4Y0_KOMPG (+1)	194 kDa	TRUE		unknown	2	0	0	0	1	1	0	0	2	2	0	0
97.3	TRUE	Empty	DNA-directed RNA polymerase (Fragment) OS=Komagataella mondaviorum OX=2008544 GN=RPB1 PE=4 SV=1	A0A2H4ZK68_9ASCO (+1)	30 kDa	TRUE		unknown	2	0	0	0	0	0	0	0	0	1	0	0
97.4	TRUE	Empty	DNA-directed RNA polymerase (Fragment) OS=Komagataella kurtzmanii OX=1342318 PE=4 SV=1	R9UDI5_9ASCO	30 kDa	TRUE		unknown	2	0	0	0	0	0	0	0	0	1	0	0
98	TRUE	Empty	Cluster of tr|A0A1B2J7A6|A0A1B2J7A6_PICPA-DECOY	tr|A0A1B2J7A6|A0A1B2J7A6_PICPA-DECOY [2]	?	TRUE		unknown	2	0	0	0	2	1	0	0	0	0	0	0
98.1	TRUE	Empty	tr|A0A1B2J7A6|A0A1B2J7A6_PICPA-DECOY	tr|A0A1B2J7A6|A0A1B2J7A6_PICPA-DECOY	?	TRUE		unknown	1	0	0	0	2	1	0	0	0	0	0	0
98.2	TRUE	Empty	tr|A0A1G4KPH4|A0A1G4KPH4_KOMPC-DECOY	tr|A0A1G4KPH4|A0A1G4KPH4_KOMPC-DECOY (+1)	?	TRUE		unknown	2	0	0	0	2	1	0	0	0	0	0	0
99	TRUE	Empty	Ribosomal protein VAR1, mitochondrial OS=Komagataella phaffii (strain ATCC 76273 / CBS 7435 / CECT 11047 / NRRL Y-11430 / Wegner 21-1) OX=981350 GN=VAR1 PE=3 SV=2	F2R0K4_KOMPC	45 kDa			unknown	2	0	1	0	2	0	0	0	0	1	1	0
100	TRUE	Empty	Cluster of non-specific serine/threonine protein kinase OS=Komagataella pastoris OX=4922 GN=GCN2 PE=4 SV=1 (A0A1B2JGV0_PICPA)	A0A1B2JGV0_PICPA [3]	194 kDa	TRUE		unknown	0	0	0	1	3	0	0	0	3	1	0	0
100.1	TRUE	Empty	non-specific serine/threonine protein kinase OS=Komagataella pastoris OX=4922 GN=GCN2 PE=4 SV=1	A0A1B2JGV0_PICPA	194 kDa	TRUE		unknown	0	0	0	1	3	0	0	0	1	0	0	0
100.2	TRUE	Empty	non-specific serine/threonine protein kinase OS=Komagataella phaffii (strain GS115 / ATCC 20864) OX=644223 GN=PAS_chr3_0850 PE=4 SV=1	C4R5R6_KOMPG (+1)	194 kDa	TRUE		unknown	0	0	0	1	1	0	0	0	3	1	0	0
101	TRUE	Empty	Cluster of tr|A0A1B2JGV0|A0A1B2JGV0_PICPA-DECOY	tr|A0A1B2JGV0|A0A1B2JGV0_PICPA-DECOY [3]	?	TRUE		unknown	2	0	1	0	1	0	0	0	1	7	6	0
101.1	TRUE	Empty	tr|A0A1B2JGV0|A0A1B2JGV0_PICPA-DECOY	tr|A0A1B2JGV0|A0A1B2JGV0_PICPA-DECOY	?	TRUE		unknown	2	0	0	0	1	0	0	0	1	5	6	0
101.2	TRUE	Empty	tr|F2QV74|F2QV74_KOMPC-DECOY	tr|F2QV74|F2QV74_KOMPC-DECOY (+1)	?	TRUE		unknown	1	0	1	0	1	0	0	0	0	4	3	0
102	TRUE	Empty	tr|Q9BHJ5|Q9BHJ5_TRYCR-DECOY	tr|Q9BHJ5|Q9BHJ5_TRYCR-DECOY	?			unknown	0	0	7	1	5	2	0	0	4	2	1	0
103	TRUE	Empty	Cluster of BA75_00765T0 OS=Komagataella pastoris OX=4922 GN=SEC7 PE=4 SV=1 (A0A1B2J9J4_PICPA)	A0A1B2J9J4_PICPA	200 kDa	TRUE		unknown	0	0	0	0	2	1	0	0	1	7	2	0
103.1	TRUE	Empty	BA75_00765T0 OS=Komagataella pastoris OX=4922 GN=SEC7 PE=4 SV=1	A0A1B2J9J4_PICPA	200 kDa	TRUE		unknown	0	0	0	0	2	1	0	0	0	6	1	0
103.2	TRUE	Empty	SEC7 domain-containing protein OS=Komagataella phaffii (strain GS115 / ATCC 20864) OX=644223 GN=PAS_chr1-4_0667 PE=4 SV=1	C4QY13_KOMPG (+2)	200 kDa	TRUE		unknown	0	0	0	0	1	1	0	0	1	1	1	0
104	TRUE	Empty	Cluster of tr|C4QXG1|C4QXG1_KOMPG-DECOY	tr|C4QXG1|C4QXG1_KOMPG-DECOY	?	TRUE		unknown	4	0	1	0	3	0	0	1	0	4	1	0
104.1	TRUE	Empty	tr|C4QXG1|C4QXG1_KOMPG-DECOY	tr|C4QXG1|C4QXG1_KOMPG-DECOY	?	TRUE		unknown	4	0	1	0	3	0	0	1	0	4	1	0
104.2	TRUE	Empty	tr|F2QN57|F2QN57_KOMPC-DECOY	tr|F2QN57|F2QN57_KOMPC-DECOY	?	TRUE		unknown	3	0	1	0	3	0	0	1	0	4	1	0
105	TRUE	Empty	Subunit of SAGA histone acetyltransferase complex OS=Komagataella phaffii (strain GS115 / ATCC 20864) OX=644223 GN=PAS_chr1-4_0651 PE=1 SV=1	C4QZ39_KOMPG	74 kDa	TRUE		unknown	1	0	5	1	4	1	0	0	1	2	0	0
106	TRUE	Empty	Cluster of tr|C4R0G6|C4R0G6_KOMPG-DECOY	tr|C4R0G6|C4R0G6_KOMPG-DECOY [2]	?	TRUE		unknown	1	0	0	1	3	2	0	1	0	1	2	0
106.1	TRUE	Empty	tr|C4R0G6|C4R0G6_KOMPG-DECOY	tr|C4R0G6|C4R0G6_KOMPG-DECOY (+1)	?	TRUE		unknown	1	0	0	1	2	2	0	1	0	1	1	0
106.2	TRUE	Empty	tr|A0A1B2JCF7|A0A1B2JCF7_PICPA-DECOY	tr|A0A1B2JCF7|A0A1B2JCF7_PICPA-DECOY	?	TRUE		unknown	0	0	0	0	1	0	0	1	0	1	1	0
107	TRUE	Empty	Cluster of tr|A0A1B2JAY4|A0A1B2JAY4_PICPA-DECOY	tr|A0A1B2JAY4|A0A1B2JAY4_PICPA-DECOY [3]	?	TRUE		unknown	0	0	1	4	4	1	0	1	2	0	1	0
107.1	TRUE	Empty	tr|A0A1B2JAY4|A0A1B2JAY4_PICPA-DECOY	tr|A0A1B2JAY4|A0A1B2JAY4_PICPA-DECOY	?	TRUE		unknown	0	0	1	3	2	1	0	1	2	0	1	0
107.2	TRUE	Empty	tr|C4R7J5|C4R7J5_KOMPG-DECOY	tr|C4R7J5|C4R7J5_KOMPG-DECOY (+1)	?	TRUE		unknown	0	0	1	3	4	1	0	0	0	0	1	0
108	TRUE	Empty	Cluster of tr|A0A1B2JIC1|A0A1B2JIC1_PICPA-DECOY	tr|A0A1B2JIC1|A0A1B2JIC1_PICPA-DECOY	?	TRUE		unknown	3	0	1	1	3	1	0	0	0	1	3	0
108.1	TRUE	Empty	tr|A0A1B2JIC1|A0A1B2JIC1_PICPA-DECOY	tr|A0A1B2JIC1|A0A1B2JIC1_PICPA-DECOY	?	TRUE		unknown	2	0	0	0	2	1	0	0	0	0	3	0
108.2	TRUE	Empty	tr|A0A1G4KQU4|A0A1G4KQU4_KOMPC-DECOY	tr|A0A1G4KQU4|A0A1G4KQU4_KOMPC-DECOY (+1)	?	TRUE		unknown	1	0	1	1	1	0	0	0	0	1	0	0
109	TRUE	Empty	Cluster of tr|A0A1B2JGS1|A0A1B2JGS1_PICPA-DECOY	tr|A0A1B2JGS1|A0A1B2JGS1_PICPA-DECOY [3]	?	TRUE		unknown	1	0	1	0	1	1	0	1	2	3	3	0
109.1	TRUE	Empty	tr|A0A1B2JGS1|A0A1B2JGS1_PICPA-DECOY	tr|A0A1B2JGS1|A0A1B2JGS1_PICPA-DECOY	?	TRUE		unknown	1	0	1	0	1	1	0	0	2	2	2	0
109.2	TRUE	Empty	tr|C4QZ69|C4QZ69_KOMPG-DECOY	tr|C4QZ69|C4QZ69_KOMPG-DECOY (+1)	?	TRUE		unknown	1	0	1	0	0	1	0	1	2	1	3	0
110	TRUE	Empty	Cluster of tr|A0A1B2JHC5|A0A1B2JHC5_PICPA-DECOY	tr|A0A1B2JHC5|A0A1B2JHC5_PICPA-DECOY [3]	?	TRUE		unknown	2	0	0	0	2	0	0	0	0	0	2	0
110.1	TRUE	Empty	tr|A0A1B2JHC5|A0A1B2JHC5_PICPA-DECOY	tr|A0A1B2JHC5|A0A1B2JHC5_PICPA-DECOY	?	TRUE		unknown	1	0	0	0	0	0	0	0	0	0	2	0
110.2	TRUE	Empty	tr|C4R890|C4R890_KOMPG-DECOY	tr|C4R890|C4R890_KOMPG-DECOY (+1)	?	TRUE		unknown	1	0	0	0	2	0	0	0	0	0	1	0
111	TRUE	Empty	Cluster of tr|A0A1B2JGU0|A0A1B2JGU0_PICPA-DECOY	tr|A0A1B2JGU0|A0A1B2JGU0_PICPA-DECOY	?	TRUE		unknown	0	0	0	1	2	0	0	0	3	6	0	0
111.1	TRUE	Empty	tr|A0A1B2JGU0|A0A1B2JGU0_PICPA-DECOY	tr|A0A1B2JGU0|A0A1B2JGU0_PICPA-DECOY	?	TRUE		unknown	0	0	0	1	2	0	0	0	3	6	0	0
111.2	TRUE	Empty	tr|C4QYX5|C4QYX5_KOMPG-DECOY	tr|C4QYX5|C4QYX5_KOMPG-DECOY (+1)	?	TRUE		unknown	0	0	0	1	0	0	0	0	0	3	0	0
112	TRUE	Empty	Cluster of tr|C4R774|C4R774_KOMPG-DECOY	tr|C4R774|C4R774_KOMPG-DECOY [3]	?	TRUE		unknown	1	0	0	0	4	7	0	0	0	8	3	0
112.1	TRUE	Empty	tr|C4R774|C4R774_KOMPG-DECOY	tr|C4R774|C4R774_KOMPG-DECOY (+1)	?	TRUE		unknown	1	0	0	0	2	6	0	0	0	8	3	0
112.2	TRUE	Empty	tr|A0A1B2JDH7|A0A1B2JDH7_PICPA-DECOY	tr|A0A1B2JDH7|A0A1B2JDH7_PICPA-DECOY	?	TRUE		unknown	1	0	0	0	3	6	0	0	0	7	3	0
113	TRUE	Empty	Cluster of tr|Q9UVK1|Q9UVK1_PICPA-DECOY	tr|Q9UVK1|Q9UVK1_PICPA-DECOY	?	TRUE		unknown	0	0	1	0	0	0	0	0	2	1	0	0
113.1	TRUE	Empty	tr|Q9UVK1|Q9UVK1_PICPA-DECOY	tr|Q9UVK1|Q9UVK1_PICPA-DECOY	?	TRUE		unknown	0	0	0	0	0	0	0	0	1	0	0	0
113.2	TRUE	Empty	tr|A0A1B2J7X0|A0A1B2J7X0_PICPA-DECOY	tr|A0A1B2J7X0|A0A1B2J7X0_PICPA-DECOY	?	TRUE		unknown	0	0	1	0	0	0	0	0	1	0	0	0
113.3	TRUE	Empty	tr|C4R4G0|C4R4G0_KOMPG-DECOY	tr|C4R4G0|C4R4G0_KOMPG-DECOY (+1)	?	TRUE		unknown	0	0	1	0	0	0	0	0	1	1	0	0
114	TRUE	Empty	tr|F2QM87|F2QM87_KOMPC-DECOY	tr|F2QM87|F2QM87_KOMPC-DECOY	?	TRUE		unknown	0	1	0	2	2	2	0	0	1	1	1	0
115	TRUE	Empty	Cluster of tr|A0A1B2JAS4|A0A1B2JAS4_PICPA-DECOY	tr|A0A1B2JAS4|A0A1B2JAS4_PICPA-DECOY [2]	?	TRUE		unknown	2	0	2	1	1	2	0	0	2	1	1	0
115.1	TRUE	Empty	tr|A0A1B2JAS4|A0A1B2JAS4_PICPA-DECOY	tr|A0A1B2JAS4|A0A1B2JAS4_PICPA-DECOY	?	TRUE		unknown	0	0	1	1	1	1	0	0	2	1	1	0
115.2	TRUE	Empty	tr|F2R0F4|F2R0F4_KOMPC-DECOY	tr|F2R0F4|F2R0F4_KOMPC-DECOY (+1)	?	TRUE		unknown	2	0	2	0	1	1	0	0	0	1	0	0
116	TRUE	Empty	Cluster of tr|C4R3K4|C4R3K4_KOMPG-DECOY	tr|C4R3K4|C4R3K4_KOMPG-DECOY [2]	?	TRUE		unknown	2	0	4	0	3	0	0	5	0	3	3	0
116.1	TRUE	Empty	tr|C4R3K4|C4R3K4_KOMPG-DECOY	tr|C4R3K4|C4R3K4_KOMPG-DECOY (+1)	?	TRUE		unknown	2	0	4	0	3	0	0	5	0	3	3	0
116.2	TRUE	Empty	tr|A0A1B2J9Q6|A0A1B2J9Q6_PICPA-DECOY	tr|A0A1B2J9Q6|A0A1B2J9Q6_PICPA-DECOY	?	TRUE		unknown	1	0	1	0	0	0	0	0	0	2	0	0
117	TRUE	Empty	Cluster of tr|A0A1B2JBP8|A0A1B2JBP8_PICPA-DECOY	tr|A0A1B2JBP8|A0A1B2JBP8_PICPA-DECOY	?	TRUE		unknown	3	0	0	1	1	1	0	0	1	2	1	0
117.1	TRUE	Empty	tr|A0A1B2JBP8|A0A1B2JBP8_PICPA-DECOY	tr|A0A1B2JBP8|A0A1B2JBP8_PICPA-DECOY	?	TRUE		unknown	3	0	0	1	1	1	0	0	1	2	1	0
117.2	TRUE	Empty	tr|C4R1P2|C4R1P2_KOMPG-DECOY	tr|C4R1P2|C4R1P2_KOMPG-DECOY (+1)	?	TRUE		unknown	3	0	0	1	0	0	0	0	0	1	1	0
118	TRUE	Empty	BA75_01081T0 OS=Komagataella pastoris OX=4922 GN=BUD3 PE=4 SV=1	A0A1B2J743_PICPA	130 kDa	TRUE		unknown	0	0	0	0	2	0	0	0	0	3	0	0
119	TRUE	Empty	tr|A0A1B2JBF3|A0A1B2JBF3_PICPA-DECOY	tr|A0A1B2JBF3|A0A1B2JBF3_PICPA-DECOY	?	TRUE		unknown	2	0	2	1	5	8	1	0	3	6	3	0
120	TRUE	Empty	Cluster of tr|A0A1B2J8J2|A0A1B2J8J2_PICPA-DECOY	tr|A0A1B2J8J2|A0A1B2J8J2_PICPA-DECOY [2]	?	TRUE		unknown	2	0	0	0	2	0	0	2	1	2	0	0
120.1	TRUE	Empty	tr|A0A1B2J8J2|A0A1B2J8J2_PICPA-DECOY	tr|A0A1B2J8J2|A0A1B2J8J2_PICPA-DECOY	?	TRUE		unknown	2	0	0	0	0	0	0	2	1	0	0	0
120.2	TRUE	Empty	tr|F2QM60|F2QM60_KOMPC-DECOY	tr|F2QM60|F2QM60_KOMPC-DECOY	?	TRUE		unknown	1	0	0	0	2	0	0	1	1	2	0	0
121	TRUE	Empty	Cluster of Chromatin modification-related protein EAF1 OS=Komagataella phaffii (strain GS115 / ATCC 20864) OX=644223 GN=PAS_chr4_0298 PE=3 SV=1 (C4R7G0_KOMPG)	C4R7G0_KOMPG [3]	118 kDa	TRUE		unknown	1	0	0	0	0	3	0	0	0	0	0	0
121.1	TRUE	Empty	Chromatin modification-related protein EAF1 OS=Komagataella phaffii (strain GS115 / ATCC 20864) OX=644223 GN=PAS_chr4_0298 PE=3 SV=1	C4R7G0_KOMPG (+1)	118 kDa	TRUE		unknown	0	0	0	0	0	3	0	0	0	0	0	0
121.2	TRUE	Empty	Chromatin modification-related protein EAF1 OS=Komagataella pastoris OX=4922 GN=EAF1 PE=3 SV=1	A0A1B2JBX3_PICPA	118 kDa	TRUE		unknown	1	0	0	0	0	3	0	0	0	0	0	0
122	TRUE	Empty	Cluster of tr|C4QZ05|C4QZ05_KOMPG-DECOY	tr|C4QZ05|C4QZ05_KOMPG-DECOY [2]	?	TRUE		unknown	2	0	3	3	2	1	0	0	2	4	0	0
122.1	TRUE	Empty	tr|C4QZ05|C4QZ05_KOMPG-DECOY	tr|C4QZ05|C4QZ05_KOMPG-DECOY	?	TRUE		unknown	1	0	0	2	2	1	0	0	0	1	0	0
122.2	TRUE	Empty	tr|A0A1B2JFP4|A0A1B2JFP4_PICPA-DECOY	tr|A0A1B2JFP4|A0A1B2JFP4_PICPA-DECOY	?	TRUE		unknown	1	0	3	2	2	1	0	0	2	3	0	0
122.3	TRUE	Empty	tr|F2QQ66|F2QQ66_KOMPC-DECOY	tr|F2QQ66|F2QQ66_KOMPC-DECOY	?	TRUE		unknown	1	0	0	2	2	0	0	0	0	2	0	0
123	TRUE	Empty	BA75_03210T0 OS=Komagataella pastoris OX=4922 GN=SMC2 PE=3 SV=1	A0A1B2JCI1_PICPA	133 kDa	TRUE		unknown	2	0	4	3	1	2	0	0	1	4	1	0
124	TRUE	Empty	Cluster of tr|A0A1B2JHK5|A0A1B2JHK5_PICPA-DECOY	tr|A0A1B2JHK5|A0A1B2JHK5_PICPA-DECOY [3]	?	TRUE		unknown	2	1	4	1	2	1	0	0	0	1	1	0
124.1	TRUE	Empty	tr|A0A1B2JHK5|A0A1B2JHK5_PICPA-DECOY	tr|A0A1B2JHK5|A0A1B2JHK5_PICPA-DECOY	?	TRUE		unknown	0	1	3	1	2	0	0	0	0	0	0	0
124.2	TRUE	Empty	tr|C4QZK9|C4QZK9_KOMPG-DECOY	tr|C4QZK9|C4QZK9_KOMPG-DECOY (+1)	?	TRUE		unknown	2	1	4	1	0	1	0	0	0	1	1	0
125	TRUE	Empty	Cluster of Mediator of RNA polymerase II transcription subunit 15 OS=Komagataella phaffii (strain GS115 / ATCC 20864) OX=644223 GN=PAS_chr1-4_0155 PE=3 SV=1 (C4QXL2_KOMPG)	C4QXL2_KOMPG [3]	115 kDa	TRUE		unknown	2	0	1	1	4	1	0	0	1	2	1	0
125.1	TRUE	Empty	Mediator of RNA polymerase II transcription subunit 15 OS=Komagataella phaffii (strain GS115 / ATCC 20864) OX=644223 GN=PAS_chr1-4_0155 PE=3 SV=1	C4QXL2_KOMPG (+1)	115 kDa	TRUE		unknown	2	0	0	0	3	1	0	0	0	2	1	0
125.2	TRUE	Empty	Mediator of RNA polymerase II transcription subunit 15 OS=Komagataella pastoris OX=4922 GN=ATY40_BA7500917 PE=3 SV=1	A0A1B2J6G5_PICPA	116 kDa	TRUE		unknown	1	0	1	1	2	0	0	0	1	0	0	0
126	TRUE	Empty	Cluster of tr|C4R754|C4R754_KOMPG-DECOY	tr|C4R754|C4R754_KOMPG-DECOY [2]	?	TRUE		unknown	2	0	0	1	2	4	0	1	1	2	0	0
126.1	TRUE	Empty	tr|C4R754|C4R754_KOMPG-DECOY	tr|C4R754|C4R754_KOMPG-DECOY (+1)	?	TRUE		unknown	1	0	0	1	2	4	0	1	0	2	0	0
126.2	TRUE	Empty	tr|A0A1B2JCY9|A0A1B2JCY9_PICPA-DECOY	tr|A0A1B2JCY9|A0A1B2JCY9_PICPA-DECOY	?	TRUE		unknown	1	0	0	0	1	0	0	0	1	0	0	0
127	TRUE	Empty	Cluster of tr|A0A1B2J5T4|A0A1B2J5T4_PICPA-DECOY	tr|A0A1B2J5T4|A0A1B2J5T4_PICPA-DECOY	?	TRUE		unknown	0	0	0	0	2	1	0	1	0	0	2	0
127.1	TRUE	Empty	tr|A0A1B2J5T4|A0A1B2J5T4_PICPA-DECOY	tr|A0A1B2J5T4|A0A1B2J5T4_PICPA-DECOY	?	TRUE		unknown	0	0	0	0	2	0	0	1	0	0	0	0
127.2	TRUE	Empty	tr|C4QXH4|C4QXH4_KOMPG-DECOY	tr|C4QXH4|C4QXH4_KOMPG-DECOY (+1)	?	TRUE		unknown	0	0	0	0	0	1	0	1	0	0	2	0
128	TRUE	Empty	Cluster of BA75_00054T0 OS=Komagataella pastoris OX=4922 GN=RRP5 PE=4 SV=1 (A0A1B2J779_PICPA)	A0A1B2J779_PICPA [3]	190 kDa	TRUE		unknown	0	0	0	2	4	3	0	0	0	2	1	0
128.1	TRUE	Empty	BA75_00054T0 OS=Komagataella pastoris OX=4922 GN=RRP5 PE=4 SV=1	A0A1B2J779_PICPA	190 kDa	TRUE		unknown	0	0	0	2	3	3	0	0	0	2	1	0
128.2	TRUE	Empty	RNA binding protein OS=Komagataella phaffii (strain ATCC 76273 / CBS 7435 / CECT 11047 / NRRL Y-11430 / Wegner 21-1) OX=981350 GN=RRP5 PE=4 SV=1	F2QXJ1_KOMPC (+1)	190 kDa	TRUE		unknown	0	0	0	1	3	1	0	0	0	0	0	0
129	TRUE	Empty	Cluster of tr|A0A1B2JFA0|A0A1B2JFA0_PICPA-DECOY	tr|A0A1B2JFA0|A0A1B2JFA0_PICPA-DECOY [2]	?	TRUE		unknown	1	0	0	2	3	1	0	0	0	2	0	0
129.1	TRUE	Empty	tr|A0A1B2JFA0|A0A1B2JFA0_PICPA-DECOY	tr|A0A1B2JFA0|A0A1B2JFA0_PICPA-DECOY	?	TRUE		unknown	1	0	0	1	2	1	0	0	0	2	0	0
129.2	TRUE	Empty	tr|F2QUZ5|F2QUZ5_KOMPC-DECOY	tr|F2QUZ5|F2QUZ5_KOMPC-DECOY	?	TRUE		unknown	1	0	0	1	3	1	0	0	0	1	0	0
130	TRUE	Empty	Cluster of BA75_05236T0 OS=Komagataella pastoris OX=4922 GN=ECM5 PE=4 SV=1 (A0A1B2JHX9_PICPA)	A0A1B2JHX9_PICPA	172 kDa	TRUE		unknown	0	0	1	0	1	2	0	0	2	0	0	0
130.1	TRUE	Empty	BA75_05236T0 OS=Komagataella pastoris OX=4922 GN=ECM5 PE=4 SV=1	A0A1B2JHX9_PICPA	172 kDa	TRUE		unknown	0	0	1	0	0	2	0	0	2	0	0	0
130.2	TRUE	Empty	Uncharacterized protein OS=Komagataella phaffii (strain GS115 / ATCC 20864) OX=644223 GN=PAS_chr2-1_0025 PE=4 SV=1	C4QZF1_KOMPG (+1)	172 kDa	TRUE		unknown	0	0	1	0	1	0	0	0	1	0	0	0
131	TRUE	Empty	tr|A0A1B2J8S7|A0A1B2J8S7_PICPA-DECOY	tr|A0A1B2J8S7|A0A1B2J8S7_PICPA-DECOY	?	TRUE		unknown	0	0	1	1	2	4	0	0	1	3	1	0
132	TRUE	Empty	Cluster of tr|C4QY34|C4QY34_KOMPG-DECOY	tr|C4QY34|C4QY34_KOMPG-DECOY [2]	?	TRUE		unknown	0	0	2	0	2	1	0	0	0	3	1	0
132.1	TRUE	Empty	tr|C4QY34|C4QY34_KOMPG-DECOY	tr|C4QY34|C4QY34_KOMPG-DECOY (+1)	?	TRUE		unknown	0	0	2	0	2	1	0	0	0	3	1	0
132.2	TRUE	Empty	tr|A0A1B2J7T3|A0A1B2J7T3_PICPA-DECOY	tr|A0A1B2J7T3|A0A1B2J7T3_PICPA-DECOY	?	TRUE		unknown	0	0	1	0	2	1	0	0	0	3	1	0
133	TRUE	Empty	Cluster of tr|C4QX02|C4QX02_KOMPG-DECOY	tr|C4QX02|C4QX02_KOMPG-DECOY [3]	?	TRUE		unknown	2	0	3	0	2	2	0	0	1	5	5	0
133.1	TRUE	Empty	tr|C4QX02|C4QX02_KOMPG-DECOY	tr|C4QX02|C4QX02_KOMPG-DECOY (+1)	?	TRUE		unknown	2	0	3	0	2	2	0	0	1	5	5	0
133.2	TRUE	Empty	tr|A0A1B2J6T4|A0A1B2J6T4_PICPA-DECOY	tr|A0A1B2J6T4|A0A1B2J6T4_PICPA-DECOY	?	TRUE		unknown	2	0	3	0	1	1	0	0	1	5	4	0
134	TRUE	Empty	Cluster of tr|C4QWJ1|C4QWJ1_KOMPG-DECOY	tr|C4QWJ1|C4QWJ1_KOMPG-DECOY [3]	?	TRUE		unknown	1	0	2	2	1	2	0	0	0	0	0	0
134.1	TRUE	Empty	tr|C4QWJ1|C4QWJ1_KOMPG-DECOY	tr|C4QWJ1|C4QWJ1_KOMPG-DECOY (+1)	?	TRUE		unknown	0	0	1	2	1	0	0	0	0	0	0	0
134.2	TRUE	Empty	tr|A0A1B2J5S5|A0A1B2J5S5_PICPA-DECOY	tr|A0A1B2J5S5|A0A1B2J5S5_PICPA-DECOY	?	TRUE		unknown	1	0	2	0	1	2	0	0	0	0	0	0
135	TRUE	Empty	Cluster of BA75_02719T0 OS=Komagataella pastoris OX=4922 GN=KOG1 PE=3 SV=1 (A0A1B2JC58_PICPA)	A0A1B2JC58_PICPA [3]	159 kDa	TRUE		unknown	4	0	1	0	5	0	0	0	0	2	1	0
135.1	TRUE	Empty	BA75_02719T0 OS=Komagataella pastoris OX=4922 GN=KOG1 PE=3 SV=1	A0A1B2JC58_PICPA	159 kDa	TRUE		unknown	3	0	1	0	4	0	0	0	0	2	1	0
135.2	TRUE	Empty	Subunit of TORC1, a rapamycin-sensitive complex involved in growth control OS=Komagataella phaffii (strain GS115 / ATCC 20864) OX=644223 GN=PAS_chr2-1_0459 PE=3 SV=1	C4R0R2_KOMPG (+1)	158 kDa	TRUE		unknown	2	0	1	0	5	0	0	0	0	0	0	0
136	TRUE	Empty	tr|A0A1B2JDD4|A0A1B2JDD4_PICPA-DECOY	tr|A0A1B2JDD4|A0A1B2JDD4_PICPA-DECOY	?	TRUE		unknown	2	0	1	0	10	2	1	3	4	2	0	0
137	TRUE	Empty	Cluster of tr|A0A1B2JH41|A0A1B2JH41_PICPA-DECOY	tr|A0A1B2JH41|A0A1B2JH41_PICPA-DECOY [3]	?	TRUE		unknown	1	0	2	1	2	1	0	1	3	5	0	0
137.1	TRUE	Empty	tr|A0A1B2JH41|A0A1B2JH41_PICPA-DECOY	tr|A0A1B2JH41|A0A1B2JH41_PICPA-DECOY	?	TRUE		unknown	0	0	2	0	2	1	0	0	3	2	0	0
137.2	TRUE	Empty	tr|C4QZ42|C4QZ42_KOMPG-DECOY	tr|C4QZ42|C4QZ42_KOMPG-DECOY (+1)	?	TRUE		unknown	1	0	1	1	1	1	0	1	0	4	0	0
138	TRUE	Empty	Cluster of Essential abundant protein involved in regulation of transcription OS=Komagataella phaffii (strain GS115 / ATCC 20864) OX=644223 GN=PAS_chr2-2_0061 PE=4 SV=1 (C4R2Z8_KOMPG)	C4R2Z8_KOMPG [2]	217 kDa	TRUE		unknown	0	0	1	0	4	1	0	1	2	1	1	0
138.1	TRUE	Empty	Essential abundant protein involved in regulation of transcription OS=Komagataella phaffii (strain GS115 / ATCC 20864) OX=644223 GN=PAS_chr2-2_0061 PE=4 SV=1	C4R2Z8_KOMPG (+1)	217 kDa	TRUE		unknown	0	0	0	0	3	0	0	0	2	1	1	0
138.2	TRUE	Empty	BA75_01927T0 OS=Komagataella pastoris OX=4922 GN=MOT1 PE=4 SV=1	A0A1B2JAI5_PICPA	217 kDa	TRUE		unknown	0	0	1	0	1	1	0	1	1	1	1	0
139	TRUE	Empty	Cluster of BA75_02932T0 OS=Komagataella pastoris OX=4922 GN=CYR1 PE=4 SV=1 (A0A1B2JBH3_PICPA)	A0A1B2JBH3_PICPA [3]	186 kDa	TRUE		unknown	0	0	2	0	2	1	0	0	0	2	0	0
139.1	TRUE	Empty	BA75_02932T0 OS=Komagataella pastoris OX=4922 GN=CYR1 PE=4 SV=1	A0A1B2JBH3_PICPA	186 kDa	TRUE		unknown	0	0	2	0	0	1	0	0	0	2	0	0
139.2	TRUE	Empty	Adenylate cyclase, required for cAMP production and cAMP-dependent protein kinase signaling OS=Komagataella phaffii (strain GS115 / ATCC 20864) OX=644223 GN=PAS_chr4_0356 PE=4 SV=1	C4R7M5_KOMPG (+1)	185 kDa	TRUE		unknown	0	0	0	0	2	0	0	0	0	1	0	0
140	TRUE	Empty	Cluster of tr|A0A1B2JIV2|A0A1B2JIV2_PICPA-DECOY	tr|A0A1B2JIV2|A0A1B2JIV2_PICPA-DECOY	?	TRUE		unknown	2	0	1	1	1	2	0	0	1	2	1	0
140.1	TRUE	Empty	tr|A0A1B2JIV2|A0A1B2JIV2_PICPA-DECOY	tr|A0A1B2JIV2|A0A1B2JIV2_PICPA-DECOY	?	TRUE		unknown	1	0	1	1	1	1	0	0	1	1	0	0
140.2	TRUE	Empty	tr|C4R816|C4R816_KOMPG-DECOY	tr|C4R816|C4R816_KOMPG-DECOY	?	TRUE		unknown	1	0	0	0	0	1	0	0	0	1	1	0
140.3	TRUE	Empty	tr|Q0PVD7|Q0PVD7_PICPA-DECOY	tr|Q0PVD7|Q0PVD7_PICPA-DECOY	?	TRUE		unknown	0	0	0	0	0	0	0	0	0	0	0	0
140.4	TRUE	Empty	tr|F2QZ30|F2QZ30_KOMPC-DECOY	tr|F2QZ30|F2QZ30_KOMPC-DECOY	?	TRUE		unknown	0	0	0	0	0	0	0	0	0	0	0	0
141	TRUE	Empty	Cluster of RNA helicase related to Ski2p, involved in translation inhibition of non-poly(A) mRNAs OS=Komagataella phaffii (strain GS115 / ATCC 20864) OX=644223 GN=PAS_chr1-1_0269 PE=4 SV=1 (C4QWL7_KOMPG)	C4QWL7_KOMPG [3]	220 kDa	TRUE		unknown	3	0	0	0	1	2	0	0	0	3	2	0
141.1	TRUE	Empty	RNA helicase related to Ski2p, involved in translation inhibition of non-poly(A) mRNAs OS=Komagataella phaffii (strain GS115 / ATCC 20864) OX=644223 GN=PAS_chr1-1_0269 PE=4 SV=1	C4QWL7_KOMPG (+1)	220 kDa	TRUE		unknown	3	0	0	0	1	2	0	0	0	2	2	0
141.2	TRUE	Empty	BA75_01270T0 OS=Komagataella pastoris OX=4922 GN=SLH1 PE=4 SV=1	A0A1B2J5B8_PICPA	220 kDa	TRUE		unknown	1	0	0	0	0	2	0	0	0	2	1	0
142	TRUE	Empty	Cluster of tr|F2QRV0|F2QRV0_KOMPC-DECOY	tr|F2QRV0|F2QRV0_KOMPC-DECOY	?	TRUE		unknown	2	0	4	0	0	2	0	0	0	4	3	0
142.1	TRUE	Empty	tr|F2QRV0|F2QRV0_KOMPC-DECOY	tr|F2QRV0|F2QRV0_KOMPC-DECOY	?	TRUE		unknown	2	0	4	0	0	2	0	0	0	4	3	0
142.2	TRUE	Empty	tr|C4R1W8|C4R1W8_KOMPG-DECOY	tr|C4R1W8|C4R1W8_KOMPG-DECOY	?	TRUE		unknown	2	0	3	0	0	2	0	0	0	4	3	0
143	TRUE	Empty	Cluster of tr|C4QZH6|C4QZH6_KOMPG-DECOY	tr|C4QZH6|C4QZH6_KOMPG-DECOY [3]	?	TRUE		unknown	2	0	1	0	0	2	0	0	0	5	2	0
143.1	TRUE	Empty	tr|C4QZH6|C4QZH6_KOMPG-DECOY	tr|C4QZH6|C4QZH6_KOMPG-DECOY (+1)	?	TRUE		unknown	2	0	1	0	0	1	0	0	0	4	2	0
143.2	TRUE	Empty	tr|A0A1B2JJ21|A0A1B2JJ21_PICPA-DECOY	tr|A0A1B2JJ21|A0A1B2JJ21_PICPA-DECOY	?	TRUE		unknown	0	0	1	0	0	2	0	0	0	2	1	0
144	TRUE	Empty	Cluster of Vacuolar membrane-associated protein IML1 OS=Komagataella pastoris OX=4922 GN=IML1 PE=3 SV=1 (A0A1B2J8J2_PICPA)	A0A1B2J8J2_PICPA [3]	167 kDa	TRUE		unknown	1	0	1	2	3	2	0	0	1	1	2	0
144.1	TRUE	Empty	Vacuolar membrane-associated protein IML1 OS=Komagataella pastoris OX=4922 GN=IML1 PE=3 SV=1	A0A1B2J8J2_PICPA	167 kDa	TRUE		unknown	0	0	1	2	2	2	0	0	1	1	2	0
144.2	TRUE	Empty	Vacuolar membrane-associated protein IML1 OS=Komagataella phaffii (strain GS115 / ATCC 20864) OX=644223 GN=PAS_chr1-3_0181 PE=3 SV=1	C4QVH1_KOMPG (+1)	167 kDa	TRUE		unknown	1	0	0	0	3	1	0	0	0	1	1	0
145	TRUE	Empty	Cluster of Nucleolar protein with similarity to large ribosomal subunit L7 proteins OS=Komagataella phaffii (strain GS115 / ATCC 20864) OX=644223 GN=PAS_chr3_0038 PE=3 SV=1 (C4R3C9_KOMPG)	C4R3C9_KOMPG [2]	35 kDa	TRUE		unknown	3	0	3	1	2	6	0	0	0	3	3	0
145.1	TRUE	Empty	Nucleolar protein with similarity to large ribosomal subunit L7 proteins OS=Komagataella phaffii (strain GS115 / ATCC 20864) OX=644223 GN=PAS_chr3_0038 PE=3 SV=1	C4R3C9_KOMPG	35 kDa	TRUE		unknown	3	0	1	0	1	6	0	0	0	3	3	0
145.2	TRUE	Empty	BA75_00027T0 OS=Komagataella pastoris OX=4922 GN=RLP7 PE=3 SV=1	A0A1B2J9A7_PICPA	38 kDa	TRUE		unknown	0	0	1	1	2	1	0	0	0	0	0	0
145.3	TRUE	Empty	Ribosome biogenesis protein RLP7 (Ribosomal protein L7-like) OS=Komagataella phaffii (strain ATCC 76273 / CBS 7435 / CECT 11047 / NRRL Y-11430 / Wegner 21-1) OX=981350 GN=RLP7 PE=3 SV=1	A0A1G4KQM7_KOMPC	31 kDa	TRUE		unknown	0	0	1	0	1	1	0	0	0	1	0	0
146	TRUE	Empty	Cluster of RNA cytidine acetyltransferase OS=Komagataella pastoris OX=4922 GN=KRE33 PE=3 SV=1 (A0A1B2JCM5_PICPA)	A0A1B2JCM5_PICPA [3]	123 kDa	TRUE		unknown	1	0	0	3	1	1	0	0	1	2	3	0
146.1	TRUE	Empty	RNA cytidine acetyltransferase OS=Komagataella pastoris OX=4922 GN=KRE33 PE=3 SV=1	A0A1B2JCM5_PICPA	123 kDa	TRUE		unknown	1	0	0	2	1	1	0	0	1	1	2	0
146.2	TRUE	Empty	RNA cytidine acetyltransferase OS=Komagataella phaffii (strain GS115 / ATCC 20864) OX=644223 GN=NAT10 PE=3 SV=1	C4R221_KOMPG (+1)	120 kDa	TRUE		unknown	0	0	0	2	1	0	0	0	0	2	1	0
147	TRUE	Empty	Cluster of tr|F2QXJ1|F2QXJ1_KOMPC-DECOY	tr|F2QXJ1|F2QXJ1_KOMPC-DECOY [3]	?	TRUE		unknown	1	0	0	2	4	2	0	0	0	3	1	0
147.1	TRUE	Empty	tr|F2QXJ1|F2QXJ1_KOMPC-DECOY	tr|F2QXJ1|F2QXJ1_KOMPC-DECOY (+1)	?	TRUE		unknown	1	0	0	1	2	2	0	0	0	3	1	0
147.2	TRUE	Empty	tr|A0A1B2J779|A0A1B2J779_PICPA-DECOY	tr|A0A1B2J779|A0A1B2J779_PICPA-DECOY	?	TRUE		unknown	1	0	0	1	4	1	0	0	0	3	1	0
148	TRUE	Empty	Cluster of tr|A0A1B2JF67|A0A1B2JF67_PICPA-DECOY	tr|A0A1B2JF67|A0A1B2JF67_PICPA-DECOY [3]	?	TRUE		unknown	0	0	3	2	1	1	0	0	0	3	0	0
148.1	TRUE	Empty	tr|A0A1B2JF67|A0A1B2JF67_PICPA-DECOY	tr|A0A1B2JF67|A0A1B2JF67_PICPA-DECOY	?	TRUE		unknown	0	0	2	1	1	1	0	0	0	3	0	0
148.2	TRUE	Empty	tr|C4R604|C4R604_KOMPG-DECOY	tr|C4R604|C4R604_KOMPG-DECOY (+1)	?	TRUE		unknown	0	0	3	2	1	0	0	0	0	0	0	0
149	TRUE	Empty	Cluster of Meiosis-specific transcription factor OS=Komagataella phaffii (strain ATCC 76273 / CBS 7435 / CECT 11047 / NRRL Y-11430 / Wegner 21-1) OX=981350 GN=NDT80 PE=4 SV=1 (F2QRP7_KOMPC)	F2QRP7_KOMPC [2]	88 kDa	TRUE		unknown	0	0	1	0	0	4	0	0	0	1	1	0
149.1	TRUE	Empty	Meiosis-specific transcription factor OS=Komagataella phaffii (strain ATCC 76273 / CBS 7435 / CECT 11047 / NRRL Y-11430 / Wegner 21-1) OX=981350 GN=NDT80 PE=4 SV=1	F2QRP7_KOMPC	88 kDa	TRUE		unknown	0	0	1	0	0	3	0	0	0	1	1	0
149.2	TRUE	Empty	BA75_02258T0 OS=Komagataella pastoris OX=4922 GN=NDT80 PE=4 SV=1	A0A1B2JBM0_PICPA	87 kDa	TRUE		unknown	0	0	0	0	0	3	0	0	0	0	0	0
150	TRUE	Empty	Cluster of Proline dehydrogenase OS=Komagataella pastoris OX=4922 GN=PUT1 PE=3 SV=1 (A0A1B2J5D5_PICPA)	A0A1B2J5D5_PICPA [2]	53 kDa	TRUE		unknown	0	0	0	0	0	1	0	0	0	2	2	0
150.1	TRUE	Empty	Proline dehydrogenase OS=Komagataella pastoris OX=4922 GN=PUT1 PE=3 SV=1	A0A1B2J5D5_PICPA	53 kDa	TRUE		unknown	0	0	0	0	0	0	0	0	0	2	0	0
150.2	TRUE	Empty	Proline dehydrogenase OS=Komagataella phaffii (strain GS115 / ATCC 20864) OX=644223 GN=PAS_chr1-3_0269 PE=3 SV=1	C4QVR0_KOMPG (+1)	53 kDa	TRUE		unknown	0	0	0	0	0	1	0	0	0	2	2	0
151	TRUE	Empty	tr|A0A1B2JE98|A0A1B2JE98_PICPA-DECOY	tr|A0A1B2JE98|A0A1B2JE98_PICPA-DECOY	?	TRUE		unknown	3	0	2	2	13	1	0	0	1	6	1	0
152	TRUE	Empty	Cluster of tr|C4R8T2|C4R8T2_KOMPG-DECOY	tr|C4R8T2|C4R8T2_KOMPG-DECOY [3]	?	TRUE		unknown	1	0	0	1	5	1	0	1	2	3	0	0
152.1	TRUE	Empty	tr|C4R8T2|C4R8T2_KOMPG-DECOY	tr|C4R8T2|C4R8T2_KOMPG-DECOY (+1)	?	TRUE		unknown	1	0	0	1	5	1	0	1	0	3	0	0
152.2	TRUE	Empty	tr|A0A1B2JHP5|A0A1B2JHP5_PICPA-DECOY	tr|A0A1B2JHP5|A0A1B2JHP5_PICPA-DECOY	?	TRUE		unknown	1	0	0	0	3	0	0	1	2	1	0	0
153	TRUE	Empty	Cluster of Serine/threonine-protein kinase MEC1 OS=Komagataella phaffii (strain GS115 / ATCC 20864) OX=644223 GN=PAS_chr2-2_0297 PE=3 SV=1 (C4R286_KOMPG)	C4R286_KOMPG [2]	274 kDa	TRUE		unknown	0	0	1	0	1	4	0	0	0	0	0	0
153.1	TRUE	Empty	Serine/threonine-protein kinase MEC1 OS=Komagataella phaffii (strain GS115 / ATCC 20864) OX=644223 GN=PAS_chr2-2_0297 PE=3 SV=1	C4R286_KOMPG (+1)	274 kDa	TRUE		unknown	0	0	1	0	1	3	0	0	0	0	0	0
153.2	TRUE	Empty	BA75_02189T0 OS=Komagataella pastoris OX=4922 GN=ATY40_BA7502189 PE=4 SV=1	A0A1B2JD12_PICPA	91 kDa	TRUE		unknown	0	0	0	0	1	1	0	0	0	0	0	0
154	TRUE	Empty	Cluster of tr|C4QWU9|C4QWU9_KOMPG-DECOY	tr|C4QWU9|C4QWU9_KOMPG-DECOY [3]	?	TRUE		unknown	2	0	1	0	6	4	0	0	3	2	2	0
154.1	TRUE	Empty	tr|C4QWU9|C4QWU9_KOMPG-DECOY	tr|C4QWU9|C4QWU9_KOMPG-DECOY (+1)	?	TRUE		unknown	2	0	1	0	5	4	0	0	3	2	2	0
154.2	TRUE	Empty	tr|A0A1B2J9K8|A0A1B2J9K8_PICPA-DECOY	tr|A0A1B2J9K8|A0A1B2J9K8_PICPA-DECOY	?	TRUE		unknown	0	0	1	0	5	4	0	0	1	1	2	0
155	TRUE	Empty	Cluster of tr|C4R2D1|C4R2D1_KOMPG-DECOY	tr|C4R2D1|C4R2D1_KOMPG-DECOY [3]	?	TRUE		unknown	3	0	0	0	7	2	0	1	0	3	0	0
155.1	TRUE	Empty	tr|C4R2D1|C4R2D1_KOMPG-DECOY	tr|C4R2D1|C4R2D1_KOMPG-DECOY (+1)	?	TRUE		unknown	2	0	0	0	6	1	0	1	0	3	0	0
155.2	TRUE	Empty	tr|A0A1B2JBF9|A0A1B2JBF9_PICPA-DECOY	tr|A0A1B2JBF9|A0A1B2JBF9_PICPA-DECOY	?	TRUE		unknown	1	0	0	0	5	1	0	1	0	2	0	0
156	TRUE	Empty	Cluster of Helicase OS=Komagataella phaffii (strain GS115 / ATCC 20864) OX=644223 GN=PAS_chr4_0035 PE=3 SV=1 (C4R6N6_KOMPG)	C4R6N6_KOMPG [3]	177 kDa	TRUE		unknown	2	0	2	1	2	2	0	0	1	6	1	0
156.1	TRUE	Empty	Helicase OS=Komagataella phaffii (strain GS115 / ATCC 20864) OX=644223 GN=PAS_chr4_0035 PE=3 SV=1	C4R6N6_KOMPG (+1)	177 kDa	TRUE		unknown	2	0	0	1	2	2	0	0	1	4	0	0
156.2	TRUE	Empty	BA75_03286T0 OS=Komagataella pastoris OX=4922 GN=IRC20 PE=3 SV=1	A0A1B2JAS4_PICPA	177 kDa	TRUE		unknown	2	0	2	1	2	1	0	0	1	4	1	0
157	TRUE	Empty	Cluster of BA75_05044T0 OS=Komagataella pastoris OX=4922 GN=SNT2 PE=4 SV=1 (A0A1B2JJ23_PICPA)	A0A1B2JJ23_PICPA [3]	163 kDa	TRUE		unknown	1	0	0	2	3	1	0	0	0	1	0	0
157.1	TRUE	Empty	BA75_05044T0 OS=Komagataella pastoris OX=4922 GN=SNT2 PE=4 SV=1	A0A1B2JJ23_PICPA	163 kDa	TRUE		unknown	1	0	0	1	3	1	0	0	0	1	0	0
157.2	TRUE	Empty	DNA binding protein with similarity to the S. pombe Snt2 protein OS=Komagataella phaffii (strain GS115 / ATCC 20864) OX=644223 GN=PAS_chr2-1_0215 PE=4 SV=1	C4R001_KOMPG (+1)	156 kDa	TRUE		unknown	0	0	0	2	1	0	0	0	0	0	0	0
158	TRUE	Empty	Cluster of Actin cytoskeleton-regulatory complex protein PAN1 OS=Komagataella pastoris OX=4922 GN=PAN1 PE=3 SV=1 (A0A1B2JET9_PICPA)	A0A1B2JET9_PICPA [2]	165 kDa	TRUE		unknown	2	0	1	2	3	0	0	0	0	4	0	0
158.1	TRUE	Empty	Actin cytoskeleton-regulatory complex protein PAN1 OS=Komagataella pastoris OX=4922 GN=PAN1 PE=3 SV=1	A0A1B2JET9_PICPA	165 kDa	TRUE		unknown	1	0	1	2	3	0	0	0	0	1	0	0
158.2	TRUE	Empty	Actin cytoskeleton-regulatory complex protein PAN1 OS=Komagataella phaffii (strain ATCC 76273 / CBS 7435 / CECT 11047 / NRRL Y-11430 / Wegner 21-1) OX=981350 GN=PAN1 PE=3 SV=1	A0A1G4KQC0_KOMPC	166 kDa	TRUE		unknown	1	0	0	2	2	0	0	0	0	4	0	0
158.3	TRUE	Empty	Actin cytoskeleton-regulatory complex protein PAN1 OS=Komagataella phaffii (strain GS115 / ATCC 20864) OX=644223 GN=PAS_chr3_0694 PE=3 SV=1	C4R5A8_KOMPG	163 kDa	TRUE		unknown	1	0	0	0	0	0	0	0	0	4	0	0
159	TRUE	Empty	Cluster of histidine kinase OS=Komagataella phaffii (strain GS115 / ATCC 20864) OX=644223 GN=PAS_chr2-1_0162 PE=4 SV=1 (C4QZU4_KOMPG)	C4QZU4_KOMPG [2]	122 kDa	TRUE		unknown	0	0	0	0	1	1	0	0	2	4	2	0
159.1	TRUE	Empty	histidine kinase OS=Komagataella phaffii (strain GS115 / ATCC 20864) OX=644223 GN=PAS_chr2-1_0162 PE=4 SV=1	C4QZU4_KOMPG (+1)	122 kDa	TRUE		unknown	0	0	0	0	1	1	0	0	2	4	2	0
159.2	TRUE	Empty	histidine kinase OS=Komagataella pastoris OX=4922 GN=ATY40_BA7505103 PE=4 SV=1	A0A1B2JGW0_PICPA	122 kDa	TRUE		unknown	0	0	0	0	1	1	0	0	2	3	2	0
160	TRUE	Empty	Cluster of tr|C4QYA2|C4QYA2_KOMPG-DECOY	tr|C4QYA2|C4QYA2_KOMPG-DECOY [3]	?	TRUE		unknown	0	0	0	0	2	3	0	0	0	4	0	0
160.1	TRUE	Empty	tr|C4QYA2|C4QYA2_KOMPG-DECOY	tr|C4QYA2|C4QYA2_KOMPG-DECOY (+2)	?	TRUE		unknown	0	0	0	0	2	3	0	0	0	4	0	0
160.2	TRUE	Empty	tr|A0A1B2J9V5|A0A1B2J9V5_PICPA-DECOY	tr|A0A1B2J9V5|A0A1B2J9V5_PICPA-DECOY	?	TRUE		unknown	0	0	0	0	2	2	0	0	0	2	0	0
161	TRUE	Empty	Cluster of BA75_02840T0 OS=Komagataella pastoris OX=4922 GN=RAV1 PE=4 SV=1 (A0A1B2JCG7_PICPA)	A0A1B2JCG7_PICPA	161 kDa	TRUE		unknown	0	0	0	0	2	2	0	0	1	1	1	0
161.1	TRUE	Empty	BA75_02840T0 OS=Komagataella pastoris OX=4922 GN=RAV1 PE=4 SV=1	A0A1B2JCG7_PICPA	161 kDa	TRUE		unknown	0	0	0	0	2	2	0	0	1	0	1	0
161.2	TRUE	Empty	Subunit of the RAVE complex (Rav1p, Rav2p, Skp1p), which promotes assembly of the V-ATPase holoenzym OS=Komagataella phaffii (strain GS115 / ATCC 20864) OX=644223 GN=PAS_chr2-1_0345 PE=4 SV=1	C4R0E0_KOMPG	158 kDa	TRUE		unknown	0	0	0	0	0	2	0	0	0	1	1	0
161.3	TRUE	Empty	RAVE (Rav1p, Rav2p, Skp1p) complex subunit OS=Komagataella phaffii (strain ATCC 76273 / CBS 7435 / CECT 11047 / NRRL Y-11430 / Wegner 21-1) OX=981350 GN=RAV1 PE=4 SV=1	F2QTA8_KOMPC	161 kDa	TRUE		unknown	0	0	0	0	1	2	0	0	0	1	1	0
162	TRUE	Empty	Cluster of BA75_00638T0 OS=Komagataella pastoris OX=4922 GN=ATY40_BA7500638 PE=4 SV=1 (A0A1B2J7L6_PICPA)	A0A1B2J7L6_PICPA [3]	100 kDa	TRUE		unknown	2	0	0	0	3	3	0	0	0	1	2	0
162.1	TRUE	Empty	BA75_00638T0 OS=Komagataella pastoris OX=4922 GN=ATY40_BA7500638 PE=4 SV=1	A0A1B2J7L6_PICPA	100 kDa	TRUE		unknown	2	0	0	0	3	3	0	0	0	0	2	0
162.2	TRUE	Empty	Subunit of the Set3C deacetylase complex that interacts directly with the Set3C subunit OS=Komagataella phaffii (strain GS115 / ATCC 20864) OX=644223 GN=PAS_chr3_0600 PE=4 SV=1	C4R511_KOMPG (+1)	100 kDa	TRUE		unknown	0	0	0	0	1	3	0	0	0	1	1	0
163	TRUE	Empty	Cluster of tr|C4QYR4|C4QYR4_KOMPG-DECOY	tr|C4QYR4|C4QYR4_KOMPG-DECOY [3]	?	TRUE		unknown	1	0	0	0	2	1	0	1	0	1	2	0
163.1	TRUE	Empty	tr|C4QYR4|C4QYR4_KOMPG-DECOY	tr|C4QYR4|C4QYR4_KOMPG-DECOY (+1)	?	TRUE		unknown	1	0	0	0	1	1	0	1	0	0	2	0
163.2	TRUE	Empty	tr|A0A1B2JG56|A0A1B2JG56_PICPA-DECOY	tr|A0A1B2JG56|A0A1B2JG56_PICPA-DECOY	?	TRUE		unknown	0	0	0	0	2	0	0	1	0	1	1	0
164	TRUE	Empty	Cluster of Chromatin-remodeling ATPase INO80 OS=Komagataella pastoris OX=4922 GN=INO80 PE=3 SV=1 (A0A1B2J539_PICPA)	A0A1B2J539_PICPA [3]	143 kDa	TRUE		unknown	2	0	1	2	1	0	0	0	0	1	1	0
164.1	TRUE	Empty	Chromatin-remodeling ATPase INO80 OS=Komagataella pastoris OX=4922 GN=INO80 PE=3 SV=1	A0A1B2J539_PICPA	143 kDa	TRUE		unknown	2	0	1	1	0	0	0	0	0	1	0	0
164.2	TRUE	Empty	Chromatin-remodeling ATPase INO80 OS=Komagataella phaffii (strain GS115 / ATCC 20864) OX=644223 GN=PAS_chr1-1_0087 PE=3 SV=1	C4QW24_KOMPG (+1)	142 kDa	TRUE		unknown	1	0	1	2	1	0	0	0	0	1	1	0
165	TRUE	Empty	Cluster of tr|F2QTJ3|F2QTJ3_KOMPC-DECOY	tr|F2QTJ3|F2QTJ3_KOMPC-DECOY [2]	?	TRUE		unknown	0	0	0	0	4	1	0	0	1	2	2	0
165.1	TRUE	Empty	tr|F2QTJ3|F2QTJ3_KOMPC-DECOY	tr|F2QTJ3|F2QTJ3_KOMPC-DECOY	?	TRUE		unknown	0	0	0	0	4	1	0	0	1	1	1	0
165.2	TRUE	Empty	tr|A0A1B2JIX7|A0A1B2JIX7_PICPA-DECOY	tr|A0A1B2JIX7|A0A1B2JIX7_PICPA-DECOY	?	TRUE		unknown	0	0	0	0	2	0	0	0	0	2	1	0
166	TRUE	Empty	Cluster of BA75_00141T0 OS=Komagataella pastoris OX=4922 GN=ATY40_BA7500141 PE=4 SV=1 (A0A1B2J8L8_PICPA)	A0A1B2J8L8_PICPA [3]	179 kDa	TRUE		unknown	0	0	0	2	2	4	0	0	1	3	0	0
166.1	TRUE	Empty	BA75_00141T0 OS=Komagataella pastoris OX=4922 GN=ATY40_BA7500141 PE=4 SV=1	A0A1B2J8L8_PICPA	179 kDa	TRUE		unknown	0	0	0	2	2	2	0	0	0	3	0	0
166.2	TRUE	Empty	Glucose-repressible protein kinase involved in signal transduction during cell proliferation in resp OS=Komagataella phaffii (strain GS115 / ATCC 20864) OX=644223 GN=PAS_chr3_0148 PE=4 SV=1	C4R3P1_KOMPG (+1)	179 kDa	TRUE		unknown	0	0	0	2	2	4	0	0	1	2	0	0
167	TRUE	Empty	tr|A0A1B2J6A0|A0A1B2J6A0_PICPA-DECOY	tr|A0A1B2J6A0|A0A1B2J6A0_PICPA-DECOY	?	TRUE		unknown	0	0	0	1	4	2	1	0	0	1	0	0
168	TRUE	Empty	Cluster of BA75_01765T0 OS=Komagataella pastoris OX=4922 GN=SWI4 PE=4 SV=1 (A0A1B2J9W8_PICPA)	A0A1B2J9W8_PICPA	99 kDa	TRUE		unknown	0	0	0	1	1	1	0	0	1	2	2	0
168.1	TRUE	Empty	BA75_01765T0 OS=Komagataella pastoris OX=4922 GN=SWI4 PE=4 SV=1	A0A1B2J9W8_PICPA	99 kDa	TRUE		unknown	0	0	0	1	0	0	0	0	1	2	2	0
168.2	TRUE	Empty	DNA binding component of the SBF complex (Swi4p-Swi6p), a transcriptional activator OS=Komagataella phaffii (strain GS115 / ATCC 20864) OX=644223 GN=PAS_chr1-3_0098 PE=4 SV=1	C4QV84_KOMPG (+1)	99 kDa	TRUE		unknown	0	0	0	1	1	1	0	0	1	0	0	0
169	TRUE	Empty	Cluster of Protein required for export of the ribosomal subunits OS=Komagataella phaffii (strain GS115 / ATCC 20864) OX=644223 GN=PAS_chr1-4_0319 PE=3 SV=1 (C4QY37_KOMPG)	C4QY37_KOMPG [3]	135 kDa	TRUE		unknown	0	0	3	2	5	3	0	0	0	1	1	0
169.1	TRUE	Empty	Protein required for export of the ribosomal subunits OS=Komagataella phaffii (strain GS115 / ATCC 20864) OX=644223 GN=PAS_chr1-4_0319 PE=3 SV=1	C4QY37_KOMPG (+1)	135 kDa	TRUE		unknown	0	0	3	2	4	1	0	0	0	0	0	0
169.2	TRUE	Empty	BA75_00742T0 OS=Komagataella pastoris OX=4922 GN=RRP12 PE=3 SV=1	A0A1B2J7U2_PICPA	135 kDa	TRUE		unknown	0	0	3	2	3	3	0	0	0	1	1	0
170	TRUE	Empty	tr|F2QN75|F2QN75_KOMPC-DECOY	tr|F2QN75|F2QN75_KOMPC-DECOY	?	TRUE		unknown	4	2	5	1	6	9	4	3	5	3	7	1
171	TRUE	Empty	Type II myosin heavy chain, required for wild-type cytokinesis and cell separation OS=Komagataella phaffii (strain GS115 / ATCC 20864) OX=644223 GN=PAS_chr3_0823 PE=3 SV=1	C4R5P0_KOMPG	214 kDa	TRUE		unknown	0	0	4	0	4	3	0	0	4	0	0	0
172	TRUE	Empty	DNA repair protein RAD50 OS=Komagataella phaffii (strain GS115 / ATCC 20864) OX=644223 GN=PAS_chr1-4_0513 PE=3 SV=1	C4QYP1_KOMPG	152 kDa			unknown	1	0	1	0	2	1	0	0	2	0	0	0
173	TRUE	Empty	Cluster of tr|F2QQB6|F2QQB6_KOMPC-DECOY	tr|F2QQB6|F2QQB6_KOMPC-DECOY	?	TRUE		unknown	1	0	3	1	4	1	0	0	0	5	0	0
173.1	TRUE	Empty	tr|F2QQB6|F2QQB6_KOMPC-DECOY	tr|F2QQB6|F2QQB6_KOMPC-DECOY	?	TRUE		unknown	1	0	3	1	4	1	0	0	0	5	0	0
173.2	TRUE	Empty	tr|C4QZ59|C4QZ59_KOMPG-DECOY	tr|C4QZ59|C4QZ59_KOMPG-DECOY	?	TRUE		unknown	1	0	2	1	4	1	0	0	0	4	0	0
174	TRUE	Empty	Cluster of tr|A0A1G4KQ78|A0A1G4KQ78_KOMPC-DECOY	tr|A0A1G4KQ78|A0A1G4KQ78_KOMPC-DECOY [2]	?	TRUE		unknown	1	0	1	1	1	0	0	0	0	2	0	0
174.1	TRUE	Empty	tr|A0A1G4KQ78|A0A1G4KQ78_KOMPC-DECOY	tr|A0A1G4KQ78|A0A1G4KQ78_KOMPC-DECOY (+1)	?	TRUE		unknown	1	0	1	1	1	0	0	0	0	2	0	0
174.2	TRUE	Empty	tr|A0A1B2JEV0|A0A1B2JEV0_PICPA-DECOY	tr|A0A1B2JEV0|A0A1B2JEV0_PICPA-DECOY	?	TRUE		unknown	1	0	1	0	1	0	0	0	0	2	0	0
175	TRUE	Empty	Cluster of U3 small nucleolar RNA-associated protein 10 OS=Komagataella pastoris OX=4922 GN=UTP10 PE=3 SV=1 (A0A1B2JAH3_PICPA)	A0A1B2JAH3_PICPA [3]	202 kDa	TRUE		unknown	1	0	0	1	1	1	0	0	2	1	1	0
175.1	TRUE	Empty	U3 small nucleolar RNA-associated protein 10 OS=Komagataella pastoris OX=4922 GN=UTP10 PE=3 SV=1	A0A1B2JAH3_PICPA	202 kDa	TRUE		unknown	0	0	0	1	0	1	0	0	2	1	1	0
175.2	TRUE	Empty	U3 small nucleolar RNA-associated protein 10 OS=Komagataella phaffii (strain GS115 / ATCC 20864) OX=644223 GN=PAS_chr2-2_0045 PE=3 SV=1	C4R315_KOMPG (+1)	203 kDa	TRUE		unknown	1	0	0	0	1	0	0	0	2	0	1	0
176	TRUE	Empty	tr|A0A0S2MTJ4|A0A0S2MTJ4_9VIRU-DECOY	tr|A0A0S2MTJ4|A0A0S2MTJ4_9VIRU-DECOY	?			unknown	0	0	3	1	1	4	0	3	6	9	1	0
177	TRUE	Empty	Cluster of tr|C4R8K0|C4R8K0_KOMPG-DECOY	tr|C4R8K0|C4R8K0_KOMPG-DECOY [2]	?	TRUE		unknown	3	0	1	1	3	3	1	1	4	3	3	2
177.1	TRUE	Empty	tr|C4R8K0|C4R8K0_KOMPG-DECOY	tr|C4R8K0|C4R8K0_KOMPG-DECOY (+1)	?	TRUE		unknown	2	0	1	0	3	2	1	1	4	3	3	2
177.2	TRUE	Empty	tr|A0A1B2JI37|A0A1B2JI37_PICPA-DECOY	tr|A0A1B2JI37|A0A1B2JI37_PICPA-DECOY	?	TRUE		unknown	1	0	0	1	0	1	0	1	1	0	1	0
178	TRUE	Empty	Cluster of SUP35 homolog (Fragment) OS=Komagataella pastoris OX=4922 GN=SUP35 PE=4 SV=1 (Q9UVK1_PICPA)	Q9UVK1_PICPA [3]	35 kDa	TRUE		unknown	2	0	0	0	2	1	0	0	0	0	0	0
178.1	TRUE	Empty	SUP35 homolog (Fragment) OS=Komagataella pastoris OX=4922 GN=SUP35 PE=4 SV=1	Q9UVK1_PICPA	35 kDa	TRUE		unknown	0	0	0	0	0	1	0	0	0	0	0	0
178.2	TRUE	Empty	Eukaryotic peptide chain release factor GTP-binding subunit OS=Komagataella pastoris OX=4922 GN=SUP35 PE=3 SV=1	A0A1B2J7X0_PICPA	74 kDa	TRUE		unknown	1	0	0	0	2	1	0	0	0	0	0	0
178.3	TRUE	Empty	Eukaryotic peptide chain release factor GTP-binding subunit OS=Komagataella phaffii (strain GS115 / ATCC 20864) OX=644223 GN=PAS_chr3_0398 PE=3 SV=1	C4R4G0_KOMPG (+1)	78 kDa	TRUE		unknown	2	0	0	0	1	1	0	0	0	0	0	0
179	TRUE	Empty	Cluster of Exocyst complex component Sec8 OS=Komagataella pastoris OX=4922 GN=SEC8 PE=3 SV=1 (A0A1B2JIE0_PICPA)	A0A1B2JIE0_PICPA [2]	106 kDa	TRUE		unknown	0	0	0	0	4	0	0	0	1	2	0	0
179.1	TRUE	Empty	Exocyst complex component Sec8 OS=Komagataella pastoris OX=4922 GN=SEC8 PE=3 SV=1	A0A1B2JIE0_PICPA	106 kDa	TRUE		unknown	0	0	0	0	4	0	0	0	0	1	0	0
179.2	TRUE	Empty	Exocyst complex component Sec8 OS=Komagataella phaffii (strain GS115 / ATCC 20864) OX=644223 GN=PAS_chr2-1_0039 PE=3 SV=1	C4QZG5_KOMPG	106 kDa	TRUE		unknown	0	0	0	0	3	0	0	0	1	2	0	0
180	TRUE	Empty	BA75_02561T0 OS=Komagataella pastoris OX=4922 GN=SPP41 PE=4 SV=1	A0A1B2JD18_PICPA	108 kDa	TRUE		unknown	0	0	2	2	4	2	0	0	2	0	0	0
181	TRUE	Empty	BA75_02281T0 OS=Komagataella pastoris OX=4922 GN=NUP145 PE=4 SV=1	A0A1B2JDN3_PICPA	138 kDa	TRUE		unknown	2	0	0	0	2	3	0	0	0	4	1	0
182	TRUE	Empty	Cluster of tr|A0A1B2JGM9|A0A1B2JGM9_PICPA-DECOY	tr|A0A1B2JGM9|A0A1B2JGM9_PICPA-DECOY [2]	?	TRUE		unknown	1	0	4	1	1	1	0	0	2	3	2	0
182.1	TRUE	Empty	tr|A0A1B2JGM9|A0A1B2JGM9_PICPA-DECOY	tr|A0A1B2JGM9|A0A1B2JGM9_PICPA-DECOY	?	TRUE		unknown	1	0	3	1	1	1	0	0	2	3	2	0
182.2	TRUE	Empty	tr|F2QV93|F2QV93_KOMPC-DECOY	tr|F2QV93|F2QV93_KOMPC-DECOY	?	TRUE		unknown	0	0	2	1	1	1	0	0	0	2	2	0
183	TRUE	Empty	Cluster of Clathrin heavy chain OS=Komagataella phaffii (strain GS115 / ATCC 20864) OX=644223 GN=PAS_chr1-4_0546 PE=3 SV=1 (C4QYS8_KOMPG)	C4QYS8_KOMPG [2]	187 kDa	TRUE		unknown	1	0	0	1	4	0	0	1	1	1	0	0
183.1	TRUE	Empty	Clathrin heavy chain OS=Komagataella phaffii (strain GS115 / ATCC 20864) OX=644223 GN=PAS_chr1-4_0546 PE=3 SV=1	C4QYS8_KOMPG (+1)	187 kDa	TRUE		unknown	1	0	0	1	4	0	0	1	1	1	0	0
183.2	TRUE	Empty	Clathrin heavy chain OS=Komagataella pastoris OX=4922 GN=CHC1 PE=3 SV=1	A0A1B2JFR3_PICPA	187 kDa	TRUE		unknown	1	0	0	1	4	0	0	1	1	1	0	0
184	TRUE	Empty	Cluster of Myosin-2 OS=Komagataella phaffii (strain GS115 / ATCC 20864) OX=644223 GN=PAS_FragB_0012 PE=3 SV=1 (C4QZ69_KOMPG)	C4QZ69_KOMPG [3]	178 kDa	TRUE		unknown	3	0	0	0	1	1	0	0	1	1	0	0
184.1	TRUE	Empty	Myosin-2 OS=Komagataella phaffii (strain GS115 / ATCC 20864) OX=644223 GN=PAS_FragB_0012 PE=3 SV=1	C4QZ69_KOMPG (+1)	178 kDa	TRUE		unknown	2	0	0	0	1	0	0	0	1	1	0	0
184.2	TRUE	Empty	BA75_04251T0 OS=Komagataella pastoris OX=4922 GN=MYO2 PE=3 SV=1	A0A1B2JGS1_PICPA	178 kDa	TRUE		unknown	2	0	0	0	1	1	0	0	1	1	0	0
185	TRUE	Empty	Citrinin polyketide synthase OS=Monascus purpureus OX=5098 GN=pksCT PE=1 SV=2	CITS_MONPU	286 kDa			unknown	3	0	2	2	2	1	0	0	1	1	2	0
186	TRUE	Empty	tr|A0A1B2JCI1|A0A1B2JCI1_PICPA-DECOY	tr|A0A1B2JCI1|A0A1B2JCI1_PICPA-DECOY	?	TRUE		unknown	1	1	1	0	0	6	0	1	3	7	3	0
187	TRUE	Empty	tr|C4QX60|C4QX60_KOMPG-DECOY	tr|C4QX60|C4QX60_KOMPG-DECOY (+1)	?	TRUE		unknown	2	0	0	0	2	3	0	0	1	2	0	0
188	TRUE	Empty	Cluster of BA75_05168T0 OS=Komagataella pastoris OX=4922 GN=CHD1 PE=4 SV=1 (A0A1B2JHC0_PICPA)	A0A1B2JHC0_PICPA [2]	159 kDa	TRUE		unknown	2	0	1	0	0	0	0	0	1	6	0	0
188.1	TRUE	Empty	BA75_05168T0 OS=Komagataella pastoris OX=4922 GN=CHD1 PE=4 SV=1	A0A1B2JHC0_PICPA	159 kDa	TRUE		unknown	1	0	1	0	0	0	0	0	1	4	0	0
188.2	TRUE	Empty	Nucleosome remodeling factor that functions in regulation of transcription elongation OS=Komagataella phaffii (strain GS115 / ATCC 20864) OX=644223 GN=PAS_chr2-1_0095 PE=4 SV=1	C4QZM3_KOMPG	160 kDa	TRUE		unknown	2	0	1	0	0	0	0	0	0	5	0	0
189	TRUE	Empty	Vesicular transport protein OS=Komagataella phaffii (strain ATCC 76273 / CBS 7435 / CECT 11047 / NRRL Y-11430 / Wegner 21-1) OX=981350 GN=IMH1 PE=4 SV=1	F2QN57_KOMPC	134 kDa	TRUE		unknown	3	0	2	0	5	3	0	0	1	1	0	0
190	TRUE	Empty	Serum albumin (Fragment) OS=Cervus nippon OX=9863 PE=2 SV=1	X2GM95_CERNI	66 kDa			unknown	13	4	5	7	7	3	6	8	16	5	3	3
191	TRUE	Empty	Cluster of Member of an oxysterol-binding protein family with seven members in S. cerevisiae OS=Komagataella phaffii (strain GS115 / ATCC 20864) OX=644223 GN=PAS_chr3_0421 PE=3 SV=1 (C4R4I4_KOMPG)	C4R4I4_KOMPG [3]	107 kDa	TRUE		unknown	1	0	1	1	3	1	0	0	1	6	1	0
191.1	TRUE	Empty	Member of an oxysterol-binding protein family with seven members in S. cerevisiae OS=Komagataella phaffii (strain GS115 / ATCC 20864) OX=644223 GN=PAS_chr3_0421 PE=3 SV=1	C4R4I4_KOMPG (+1)	107 kDa	TRUE		unknown	1	0	1	1	2	1	0	0	1	5	1	0
191.2	TRUE	Empty	BA75_00448T0 OS=Komagataella pastoris OX=4922 GN=OSH3 PE=3 SV=1	A0A1B2J7R6_PICPA	107 kDa	TRUE		unknown	1	0	1	1	3	0	0	0	1	4	1	0
192	TRUE	Empty	Cluster of tr|C4R2S4|C4R2S4_KOMPG-DECOY	tr|C4R2S4|C4R2S4_KOMPG-DECOY [3]	?	TRUE		unknown	0	0	2	1	2	0	0	0	0	6	3	0
192.1	TRUE	Empty	tr|C4R2S4|C4R2S4_KOMPG-DECOY	tr|C4R2S4|C4R2S4_KOMPG-DECOY (+1)	?	TRUE		unknown	0	0	1	1	2	0	0	0	0	5	3	0
192.2	TRUE	Empty	tr|A0A1B2JA58|A0A1B2JA58_PICPA-DECOY	tr|A0A1B2JA58|A0A1B2JA58_PICPA-DECOY	?	TRUE		unknown	0	0	1	0	2	0	0	0	0	5	2	0
193	TRUE	Empty	Cluster of tr|A0A1B2J539|A0A1B2J539_PICPA-DECOY	tr|A0A1B2J539|A0A1B2J539_PICPA-DECOY	?	TRUE		unknown	0	0	2	0	0	4	0	0	0	3	2	0
193.1	TRUE	Empty	tr|A0A1B2J539|A0A1B2J539_PICPA-DECOY	tr|A0A1B2J539|A0A1B2J539_PICPA-DECOY	?	TRUE		unknown	0	0	2	0	0	4	0	0	0	3	1	0
193.2	TRUE	Empty	tr|C4QW24|C4QW24_KOMPG-DECOY	tr|C4QW24|C4QW24_KOMPG-DECOY (+1)	?	TRUE		unknown	0	0	1	0	0	4	0	0	0	3	1	0
194	TRUE	Empty	Cluster of E3 ubiquitin protein ligase OS=Komagataella pastoris OX=4922 GN=BRE1 PE=3 SV=1 (A0A1B2JAR6_PICPA)	A0A1B2JAR6_PICPA [2]	82 kDa	TRUE		unknown	2	0	0	1	3	1	0	0	2	1	1	0
194.1	TRUE	Empty	E3 ubiquitin protein ligase OS=Komagataella pastoris OX=4922 GN=BRE1 PE=3 SV=1	A0A1B2JAR6_PICPA	82 kDa	TRUE		unknown	1	0	0	1	2	1	0	0	2	0	0	0
194.2	TRUE	Empty	E3 ubiquitin protein ligase OS=Komagataella phaffii (strain GS115 / ATCC 20864) OX=644223 GN=PAS_chr4_0172 PE=3 SV=1	C4R722_KOMPG	82 kDa	TRUE		unknown	1	0	0	1	2	0	0	0	1	1	1	0
195	TRUE	Empty	Cluster of Histone-lysine N-methyltransferase, H3 lysine-4 specific OS=Komagataella pastoris OX=4922 GN=SET1 PE=4 SV=1 (A0A1B2JBF1_PICPA)	A0A1B2JBF1_PICPA [2]	117 kDa	TRUE		unknown	0	0	0	1	4	0	0	1	1	1	1	0
195.1	TRUE	Empty	Histone-lysine N-methyltransferase, H3 lysine-4 specific OS=Komagataella pastoris OX=4922 GN=SET1 PE=4 SV=1	A0A1B2JBF1_PICPA	117 kDa	TRUE		unknown	0	0	0	1	3	0	0	0	1	1	1	0
195.2	TRUE	Empty	Histone-lysine N-methyltransferase, H3 lysine-4 specific OS=Komagataella phaffii (strain GS115 / ATCC 20864) OX=644223 GN=PAS_chr2-2_0494 PE=4 SV=1	C4R217_KOMPG	118 kDa	TRUE		unknown	0	0	0	0	3	0	0	1	0	0	1	0
196	TRUE	Empty	Cluster of tr|C4QZU4|C4QZU4_KOMPG-DECOY	tr|C4QZU4|C4QZU4_KOMPG-DECOY [2]	?	TRUE		unknown	1	0	1	0	3	2	0	0	2	0	2	0
196.1	TRUE	Empty	tr|C4QZU4|C4QZU4_KOMPG-DECOY	tr|C4QZU4|C4QZU4_KOMPG-DECOY (+1)	?	TRUE		unknown	1	0	1	0	3	2	0	0	2	0	2	0
196.2	TRUE	Empty	tr|A0A1B2JGW0|A0A1B2JGW0_PICPA-DECOY	tr|A0A1B2JGW0|A0A1B2JGW0_PICPA-DECOY	?	TRUE		unknown	1	0	1	0	3	2	0	0	2	0	1	0
197	TRUE	Empty	Cluster of tr|C4R714|C4R714_KOMPG-DECOY	tr|C4R714|C4R714_KOMPG-DECOY [3]	?	TRUE		unknown	1	0	0	0	1	0	0	0	0	1	2	0
197.1	TRUE	Empty	tr|C4R714|C4R714_KOMPG-DECOY	tr|C4R714|C4R714_KOMPG-DECOY (+1)	?	TRUE		unknown	1	0	0	0	1	0	0	0	0	1	2	0
197.2	TRUE	Empty	tr|A0A1B2JBC6|A0A1B2JBC6_PICPA-DECOY	tr|A0A1B2JBC6|A0A1B2JBC6_PICPA-DECOY	?	TRUE		unknown	1	0	0	0	1	0	0	0	0	0	2	0
198	TRUE	Empty	tr|C4R5P0|C4R5P0_KOMPG-DECOY	tr|C4R5P0|C4R5P0_KOMPG-DECOY	?	TRUE		unknown	1	0	0	2	9	2	0	0	1	5	3	0
199	TRUE	Empty	BA75_04242T0 OS=Komagataella pastoris OX=4922 GN=CSF1 PE=4 SV=1	A0A1B2JEE0_PICPA	348 kDa	TRUE		unknown	0	0	1	0	3	2	0	0	1	1	1	0
200	TRUE	Empty	Cluster of tr|C4R4Y0|C4R4Y0_KOMPG-DECOY	tr|C4R4Y0|C4R4Y0_KOMPG-DECOY [2]	?	TRUE		unknown	0	0	1	0	2	1	0	0	0	2	2	0
200.1	TRUE	Empty	tr|C4R4Y0|C4R4Y0_KOMPG-DECOY	tr|C4R4Y0|C4R4Y0_KOMPG-DECOY (+1)	?	TRUE		unknown	0	0	1	0	2	1	0	0	0	2	2	0
200.2	TRUE	Empty	tr|I7A0B8|I7A0B8_PICPA-DECOY	tr|I7A0B8|I7A0B8_PICPA-DECOY	?	TRUE		unknown	0	0	1	0	2	0	0	0	0	1	1	0
200.3	TRUE	Empty	tr|R9UDI5|R9UDI5_9ASCO-DECOY	tr|R9UDI5|R9UDI5_9ASCO-DECOY	?	TRUE		unknown	0	0	1	0	1	0	0	0	0	2	1	0
200.4	TRUE	Empty	tr|A0A2H4ZK68|A0A2H4ZK68_9ASCO-DECOY	tr|A0A2H4ZK68|A0A2H4ZK68_9ASCO-DECOY (+1)	?	TRUE		unknown	0	0	1	0	0	0	0	0	0	2	1	0
201	TRUE	Empty	Cluster of TFIID subunit (145 kDa) OS=Komagataella phaffii (strain GS115 / ATCC 20864) OX=644223 GN=PAS_chr1-4_0012 PE=4 SV=1 (C4QX73_KOMPG)	C4QX73_KOMPG [2]	116 kDa	TRUE		unknown	0	0	3	0	0	1	0	0	1	4	1	0
201.1	TRUE	Empty	TFIID subunit (145 kDa) OS=Komagataella phaffii (strain GS115 / ATCC 20864) OX=644223 GN=PAS_chr1-4_0012 PE=4 SV=1	C4QX73_KOMPG (+1)	116 kDa	TRUE		unknown	0	0	3	0	0	1	0	0	1	4	0	0
201.2	TRUE	Empty	BA75_01063T0 OS=Komagataella pastoris OX=4922 GN=TAF1 PE=4 SV=1	A0A1B2JA62_PICPA	115 kDa	TRUE		unknown	0	0	2	0	0	1	0	0	0	3	1	0
202	TRUE	Empty	Cluster of tr|C4R723|C4R723_KOMPG-DECOY	tr|C4R723|C4R723_KOMPG-DECOY [2]	?	TRUE		unknown	0	0	4	0	2	1	0	0	0	1	1	0
202.1	TRUE	Empty	tr|C4R723|C4R723_KOMPG-DECOY	tr|C4R723|C4R723_KOMPG-DECOY (+1)	?	TRUE		unknown	0	0	4	0	2	1	0	0	0	1	1	0
202.2	TRUE	Empty	tr|A0A1B2JAE0|A0A1B2JAE0_PICPA-DECOY	tr|A0A1B2JAE0|A0A1B2JAE0_PICPA-DECOY	?	TRUE		unknown	0	0	3	0	2	1	0	0	0	1	0	0
203	TRUE	Empty	Cluster of Elongation factor 2 OS=Komagataella pastoris OX=4922 GN=EFT1 PE=3 SV=1 (A0A1B2JHN5_PICPA)	A0A1B2JHN5_PICPA [4]	94 kDa	TRUE		unknown	5	8	0	1	8	3	0	3	2	5	3	0
203.1	TRUE	Empty	Elongation factor 2 OS=Komagataella pastoris OX=4922 GN=EFT1 PE=3 SV=1	A0A1B2JHN5_PICPA	94 kDa	TRUE		unknown	5	8	0	1	7	2	0	3	2	5	2	0
203.2	TRUE	Empty	Elongation factor 2 OS=Komagataella phaffii (strain ATCC 76273 / CBS 7435 / CECT 11047 / NRRL Y-11430 / Wegner 21-1) OX=981350 GN=EFT2 PE=3 SV=1	A0A1G4KQ30_KOMPC (+2)	93 kDa	TRUE		unknown	5	8	0	1	8	3	0	3	2	5	3	0
204	TRUE	Empty	Cluster of tr|C4R6B2|C4R6B2_KOMPG-DECOY	tr|C4R6B2|C4R6B2_KOMPG-DECOY [3]	?	TRUE		unknown	1	0	0	1	2	2	0	1	0	2	0	0
204.1	TRUE	Empty	tr|C4R6B2|C4R6B2_KOMPG-DECOY	tr|C4R6B2|C4R6B2_KOMPG-DECOY (+1)	?	TRUE		unknown	0	0	0	0	2	1	0	1	0	2	0	0
204.2	TRUE	Empty	tr|A0A1B2JEF0|A0A1B2JEF0_PICPA-DECOY	tr|A0A1B2JEF0|A0A1B2JEF0_PICPA-DECOY	?	TRUE		unknown	1	0	0	1	0	2	0	1	0	0	0	0
205	TRUE	Empty	Cluster of tr|A0A1B2J8P8|A0A1B2J8P8_PICPA-DECOY	tr|A0A1B2J8P8|A0A1B2J8P8_PICPA-DECOY	?	TRUE		unknown	0	0	0	1	3	2	0	0	3	1	1	0
205.1	TRUE	Empty	tr|A0A1B2J8P8|A0A1B2J8P8_PICPA-DECOY	tr|A0A1B2J8P8|A0A1B2J8P8_PICPA-DECOY	?	TRUE		unknown	0	0	0	0	3	2	0	0	3	1	1	0
205.2	TRUE	Empty	tr|F2QN59|F2QN59_KOMPC-DECOY	tr|F2QN59|F2QN59_KOMPC-DECOY (+1)	?	TRUE		unknown	0	0	0	1	2	1	0	0	3	0	0	0
206	TRUE	Empty	Cluster of DNA helicase OS=Komagataella phaffii (strain GS115 / ATCC 20864) OX=644223 GN=PAS_FragB_0056 PE=3 SV=1 (C4QZB4_KOMPG)	C4QZB4_KOMPG [3]	148 kDa	TRUE		unknown	0	0	4	0	1	1	0	1	1	2	2	0
206.1	TRUE	Empty	DNA helicase OS=Komagataella phaffii (strain GS115 / ATCC 20864) OX=644223 GN=PAS_FragB_0056 PE=3 SV=1	C4QZB4_KOMPG (+1)	148 kDa	TRUE		unknown	0	0	4	0	1	0	0	0	1	2	0	0
206.2	TRUE	Empty	DNA helicase OS=Komagataella pastoris OX=4922 GN=SGS1 PE=3 SV=1	A0A1B2JH06_PICPA	148 kDa	TRUE		unknown	0	0	1	0	1	1	0	1	1	1	2	0
207	TRUE	Empty	Cluster of tr|A0A1B2JAR6|A0A1B2JAR6_PICPA-DECOY	tr|A0A1B2JAR6|A0A1B2JAR6_PICPA-DECOY	?	TRUE		unknown	1	0	1	0	1	2	0	0	0	1	0	0
207.1	TRUE	Empty	tr|A0A1B2JAR6|A0A1B2JAR6_PICPA-DECOY	tr|A0A1B2JAR6|A0A1B2JAR6_PICPA-DECOY	?	TRUE		unknown	1	0	0	0	1	2	0	0	0	1	0	0
207.2	TRUE	Empty	tr|F2R016|F2R016_KOMPC-DECOY	tr|F2R016|F2R016_KOMPC-DECOY	?	TRUE		unknown	0	0	1	0	0	1	0	0	0	0	0	0
207.3	TRUE	Empty	tr|F2R015|F2R015_KOMPC-DECOY	tr|F2R015|F2R015_KOMPC-DECOY	?	TRUE		unknown	0	0	0	0	1	1	0	0	0	1	0	0
208	TRUE	Empty	tr|F2QZK8|F2QZK8_KOMPC-DECOY	tr|F2QZK8|F2QZK8_KOMPC-DECOY (+1)	?	TRUE		unknown	2	0	1	0	5	4	0	1	0	4	0	0
209	TRUE	Empty	Cluster of tr|A0A1B2JC36|A0A1B2JC36_PICPA-DECOY	tr|A0A1B2JC36|A0A1B2JC36_PICPA-DECOY [3]	?	TRUE		unknown	2	0	3	3	4	5	0	0	1	1	1	0
209.1	TRUE	Empty	tr|A0A1B2JC36|A0A1B2JC36_PICPA-DECOY	tr|A0A1B2JC36|A0A1B2JC36_PICPA-DECOY	?	TRUE		unknown	2	0	3	3	4	5	0	0	1	1	1	0
209.2	TRUE	Empty	tr|C4R0A2|C4R0A2_KOMPG-DECOY	tr|C4R0A2|C4R0A2_KOMPG-DECOY (+1)	?	TRUE		unknown	2	0	3	2	4	5	0	0	1	1	1	0
210	TRUE	Empty	Cluster of BA75_02002T0 OS=Komagataella pastoris OX=4922 GN=STH1 PE=4 SV=1 (A0A1B2JA58_PICPA)	A0A1B2JA58_PICPA	143 kDa	TRUE		unknown	0	0	2	0	0	2	0	0	0	1	2	0
210.1	TRUE	Empty	BA75_02002T0 OS=Komagataella pastoris OX=4922 GN=STH1 PE=4 SV=1	A0A1B2JA58_PICPA	143 kDa	TRUE		unknown	0	0	2	0	0	2	0	0	0	1	2	0
210.2	TRUE	Empty	ATPase component of the RSC chromatin remodeling complex OS=Komagataella phaffii (strain GS115 / ATCC 20864) OX=644223 GN=PAS_chr2-2_0128 PE=4 SV=1	C4R2S4_KOMPG (+1)	143 kDa	TRUE		unknown	0	0	2	0	0	2	0	0	0	1	0	0
211	TRUE	Empty	Cluster of Subunit of TFIIH and nucleotide excision repair factor 3 complexes OS=Komagataella phaffii (strain GS115 / ATCC 20864) OX=644223 GN=PAS_chr4_0745 PE=3 SV=1 (C4R8T2_KOMPG)	C4R8T2_KOMPG [3]	68 kDa	TRUE		unknown	1	0	0	2	4	1	0	0	0	1	0	0
211.1	TRUE	Empty	Subunit of TFIIH and nucleotide excision repair factor 3 complexes OS=Komagataella phaffii (strain GS115 / ATCC 20864) OX=644223 GN=PAS_chr4_0745 PE=3 SV=1	C4R8T2_KOMPG (+1)	68 kDa	TRUE		unknown	1	0	0	0	3	0	0	0	0	0	0	0
211.2	TRUE	Empty	BA75_04569T0 OS=Komagataella pastoris OX=4922 GN=TFB1 PE=3 SV=1	A0A1B2JHP5_PICPA	68 kDa	TRUE		unknown	1	0	0	2	2	1	0	0	0	1	0	0
212	TRUE	Empty	Cluster of Rho GDP/GTP exchange factor OS=Komagataella phaffii (strain ATCC 76273 / CBS 7435 / CECT 11047 / NRRL Y-11430 / Wegner 21-1) OX=981350 GN=ROM2 PE=4 SV=1 (F2QX04_KOMPC)	F2QX04_KOMPC [2]	155 kDa	TRUE		unknown	1	0	0	1	3	0	0	0	0	0	1	0
212.1	TRUE	Empty	Rho GDP/GTP exchange factor OS=Komagataella phaffii (strain ATCC 76273 / CBS 7435 / CECT 11047 / NRRL Y-11430 / Wegner 21-1) OX=981350 GN=ROM2 PE=4 SV=1	F2QX04_KOMPC	155 kDa	TRUE		unknown	1	0	0	1	3	0	0	0	0	0	0	0
212.2	TRUE	Empty	BA75_00247T0 OS=Komagataella pastoris OX=4922 GN=ROM2 PE=4 SV=1	A0A1B2J6N7_PICPA	155 kDa	TRUE		unknown	0	0	0	1	2	0	0	0	0	0	1	0
213	TRUE	Empty	Cluster of tr|C4R217|C4R217_KOMPG-DECOY	tr|C4R217|C4R217_KOMPG-DECOY [2]	?	TRUE		unknown	0	0	2	0	2	0	0	0	1	0	0	0
213.1	TRUE	Empty	tr|C4R217|C4R217_KOMPG-DECOY	tr|C4R217|C4R217_KOMPG-DECOY	?	TRUE		unknown	0	0	2	0	1	0	0	0	1	0	0	0
213.2	TRUE	Empty	tr|A0A1B2JBF1|A0A1B2JBF1_PICPA-DECOY	tr|A0A1B2JBF1|A0A1B2JBF1_PICPA-DECOY	?	TRUE		unknown	0	0	1	0	2	0	0	0	0	0	0	0
214	TRUE	Empty	Cluster of tr|C4QXP3|C4QXP3_KOMPG-DECOY	tr|C4QXP3|C4QXP3_KOMPG-DECOY [2]	?	TRUE		unknown	2	0	0	1	1	1	0	0	1	4	0	0
214.1	TRUE	Empty	tr|C4QXP3|C4QXP3_KOMPG-DECOY	tr|C4QXP3|C4QXP3_KOMPG-DECOY (+1)	?	TRUE		unknown	2	0	0	1	1	1	0	0	1	4	0	0
214.2	TRUE	Empty	tr|A0A1B2J6V3|A0A1B2J6V3_PICPA-DECOY	tr|A0A1B2J6V3|A0A1B2J6V3_PICPA-DECOY	?	TRUE		unknown	0	0	0	0	0	0	0	0	0	0	0	0
215	TRUE	Empty	Cluster of tr|A0A1B2JCH1|A0A1B2JCH1_PICPA-DECOY	tr|A0A1B2JCH1|A0A1B2JCH1_PICPA-DECOY	?	TRUE		unknown	1	0	0	0	2	3	0	0	1	0	0	0
215.1	TRUE	Empty	tr|A0A1B2JCH1|A0A1B2JCH1_PICPA-DECOY	tr|A0A1B2JCH1|A0A1B2JCH1_PICPA-DECOY	?	TRUE		unknown	0	0	0	0	1	2	0	0	1	0	0	0
215.2	TRUE	Empty	tr|C4R6V1|C4R6V1_KOMPG-DECOY	tr|C4R6V1|C4R6V1_KOMPG-DECOY (+1)	?	TRUE		unknown	1	0	0	0	1	1	0	0	0	0	0	0
216	TRUE	Empty	BA75_02560T0 OS=Komagataella pastoris OX=4922 GN=YLR419W PE=4 SV=1	A0A1B2JDI6_PICPA	154 kDa	TRUE		unknown	0	0	0	2	2	1	0	0	0	1	1	0
217	TRUE	Empty	Cluster of Structural maintenance of chromosomes protein 4 OS=Komagataella phaffii (strain GS115 / ATCC 20864) OX=644223 GN=PAS_chr2-2_0416 PE=3 SV=1 (C4R1W8_KOMPG)	C4R1W8_KOMPG	164 kDa	TRUE		unknown	2	0	2	0	4	2	0	0	2	4	2	0
217.1	TRUE	Empty	Structural maintenance of chromosomes protein 4 OS=Komagataella phaffii (strain GS115 / ATCC 20864) OX=644223 GN=PAS_chr2-2_0416 PE=3 SV=1	C4R1W8_KOMPG	164 kDa	TRUE		unknown	1	0	2	0	4	2	0	0	2	4	2	0
217.2	TRUE	Empty	Structural maintenance of chromosomes protein 4 OS=Komagataella phaffii (strain ATCC 76273 / CBS 7435 / CECT 11047 / NRRL Y-11430 / Wegner 21-1) OX=981350 GN=SMC4 PE=3 SV=1	F2QRV0_KOMPC	165 kDa	TRUE		unknown	0	0	0	0	0	0	0	0	0	4	2	0
218	TRUE	Empty	Cluster of tr|A0A1B2JCS8|A0A1B2JCS8_PICPA-DECOY	tr|A0A1B2JCS8|A0A1B2JCS8_PICPA-DECOY	?	TRUE		unknown	0	1	2	0	0	0	0	1	2	3	1	0
218.1	TRUE	Empty	tr|A0A1B2JCS8|A0A1B2JCS8_PICPA-DECOY	tr|A0A1B2JCS8|A0A1B2JCS8_PICPA-DECOY	?	TRUE		unknown	0	0	2	0	0	0	0	1	2	2	1	0
218.2	TRUE	Empty	tr|C4R7D8|C4R7D8_KOMPG-DECOY	tr|C4R7D8|C4R7D8_KOMPG-DECOY	?	TRUE		unknown	0	1	2	0	0	0	0	0	2	2	1	0
218.3	TRUE	Empty	tr|F2QZQ0|F2QZQ0_KOMPC-DECOY	tr|F2QZQ0|F2QZQ0_KOMPC-DECOY	?	TRUE		unknown	0	1	2	0	0	0	0	0	2	2	1	0
219	TRUE	Empty	tr|A0A1B2JGL2|A0A1B2JGL2_PICPA-DECOY	tr|A0A1B2JGL2|A0A1B2JGL2_PICPA-DECOY	?	TRUE		unknown	0	0	0	0	0	1	0	1	0	5	0	0
220	TRUE	Empty	Cluster of tr|A0A1B2JHU5|A0A1B2JHU5_PICPA-DECOY	tr|A0A1B2JHU5|A0A1B2JHU5_PICPA-DECOY	?	TRUE		unknown	1	0	0	3	0	3	0	0	2	2	0	0
220.1	TRUE	Empty	tr|A0A1B2JHU5|A0A1B2JHU5_PICPA-DECOY	tr|A0A1B2JHU5|A0A1B2JHU5_PICPA-DECOY	?	TRUE		unknown	0	0	0	2	0	0	0	0	1	1	0	0
220.2	TRUE	Empty	tr|A0A1G4KQ32|A0A1G4KQ32_KOMPC-DECOY	tr|A0A1G4KQ32|A0A1G4KQ32_KOMPC-DECOY (+1)	?	TRUE		unknown	1	0	0	3	0	3	0	0	2	2	0	0
220.3	TRUE	Empty	tr|Q86ZV2|Q86ZV2_PICPA-DECOY	tr|Q86ZV2|Q86ZV2_PICPA-DECOY	?	TRUE		unknown	1	0	0	3	0	3	0	0	2	2	0	0
221	TRUE	Empty	Cluster of tr|A0A1B2JDK2|A0A1B2JDK2_PICPA-DECOY	tr|A0A1B2JDK2|A0A1B2JDK2_PICPA-DECOY [3]	?	TRUE		unknown	0	0	5	3	3	1	0	1	0	2	2	0
221.1	TRUE	Empty	tr|A0A1B2JDK2|A0A1B2JDK2_PICPA-DECOY	tr|A0A1B2JDK2|A0A1B2JDK2_PICPA-DECOY	?	TRUE		unknown	0	0	4	3	3	1	0	1	0	2	2	0
221.2	TRUE	Empty	tr|C4R2D0|C4R2D0_KOMPG-DECOY	tr|C4R2D0|C4R2D0_KOMPG-DECOY (+1)	?	TRUE		unknown	0	0	2	1	0	0	0	0	0	1	0	0
222	TRUE	Empty	Cluster of BA75_01295T0 OS=Komagataella pastoris OX=4922 GN=ATY40_BA7501295 PE=3 SV=1 (A0A1B2J5S5_PICPA)	A0A1B2J5S5_PICPA	91 kDa	TRUE		unknown	1	0	0	0	2	1	0	0	0	1	1	0
222.1	TRUE	Empty	BA75_01295T0 OS=Komagataella pastoris OX=4922 GN=ATY40_BA7501295 PE=3 SV=1	A0A1B2J5S5_PICPA	91 kDa	TRUE		unknown	1	0	0	0	2	1	0	0	0	1	1	0
222.2	TRUE	Empty	SWR1-complex protein 3 OS=Komagataella phaffii (strain ATCC 76273 / CBS 7435 / CECT 11047 / NRRL Y-11430 / Wegner 21-1) OX=981350 GN=SWC3 PE=3 SV=1	F2QNW4_KOMPC (+1)	90 kDa	TRUE		unknown	1	0	0	0	0	1	0	0	0	1	0	0
223	TRUE	Empty	Cluster of Subunit of a heterodimeric peroxisomal ATP-binding cassette transporter complex (Pxa1p-Pxa2p) OS=Komagataella phaffii (strain GS115 / ATCC 20864) OX=644223 GN=PAS_chr3_0822 PE=4 SV=1 (C4R5N8_KOMPG)	C4R5N8_KOMPG [2]	101 kDa	TRUE		unknown	0	0	0	0	0	0	0	0	0	5	0	0
223.1	TRUE	Empty	Subunit of a heterodimeric peroxisomal ATP-binding cassette transporter complex (Pxa1p-Pxa2p) OS=Komagataella phaffii (strain GS115 / ATCC 20864) OX=644223 GN=PAS_chr3_0822 PE=4 SV=1	C4R5N8_KOMPG (+1)	101 kDa	TRUE		unknown	0	0	0	0	0	0	0	0	0	5	0	0
223.2	TRUE	Empty	BA75_03706T0 OS=Komagataella pastoris OX=4922 GN=PXA1 PE=4 SV=1	A0A1B2JF03_PICPA	102 kDa	TRUE		unknown	0	0	0	0	0	0	0	0	0	4	0	0
224	TRUE	Empty	BA75_00968T0 OS=Komagataella pastoris OX=4922 GN=IMH1 PE=4 SV=1	A0A1B2J9C0_PICPA	134 kDa	TRUE		unknown	1	0	0	1	2	3	0	1	3	1	1	0
225	TRUE	Empty	tr|A0A1B2JD18|A0A1B2JD18_PICPA-DECOY	tr|A0A1B2JD18|A0A1B2JD18_PICPA-DECOY	?	TRUE		unknown	1	0	1	0	5	0	0	0	1	3	0	0
226	TRUE	Empty	tr|F2QPZ8|F2QPZ8_KOMPC-DECOY	tr|F2QPZ8|F2QPZ8_KOMPC-DECOY	?	TRUE		unknown	5	1	0	2	1	2	0	0	0	2	8	0
227	TRUE	Empty	Cluster of BA75_02963T0 OS=Komagataella pastoris OX=4922 GN=GCN1 PE=4 SV=1 (A0A1B2JAY4_PICPA)	A0A1B2JAY4_PICPA [3]	302 kDa	TRUE		unknown	1	0	0	1	4	1	0	0	2	0	0	0
227.1	TRUE	Empty	BA75_02963T0 OS=Komagataella pastoris OX=4922 GN=GCN1 PE=4 SV=1	A0A1B2JAY4_PICPA	302 kDa	TRUE		unknown	1	0	0	0	3	1	0	0	2	0	0	0
227.2	TRUE	Empty	Positive regulator of the Gcn2p kinase activity, forms a complex with Gcn20p OS=Komagataella phaffii (strain GS115 / ATCC 20864) OX=644223 GN=PAS_chr4_0327 PE=4 SV=1	C4R7J5_KOMPG (+1)	303 kDa	TRUE		unknown	1	0	0	1	4	1	0	0	1	0	0	0
228	TRUE	Empty	tr|C4R165|C4R165_KOMPG-DECOY	tr|C4R165|C4R165_KOMPG-DECOY (+1)	?	TRUE		unknown	2	0	0	0	3	1	0	0	0	2	2	0
229	TRUE	Empty	Cluster of 1,3-beta-glucan synthase OS=Komagataella phaffii (strain ATCC 76273 / CBS 7435 / CECT 11047 / NRRL Y-11430 / Wegner 21-1) OX=981350 GN=GSC2 PE=3 SV=1 (F2QTJ3_KOMPC)	F2QTJ3_KOMPC	204 kDa	TRUE		unknown	0	0	1	0	0	1	0	0	0	4	0	0
229.1	TRUE	Empty	1,3-beta-glucan synthase OS=Komagataella phaffii (strain ATCC 76273 / CBS 7435 / CECT 11047 / NRRL Y-11430 / Wegner 21-1) OX=981350 GN=GSC2 PE=3 SV=1	F2QTJ3_KOMPC	204 kDa	TRUE		unknown	0	0	0	0	0	1	0	0	0	4	0	0
229.2	TRUE	Empty	1,3-beta-glucan synthase OS=Komagataella pastoris OX=4922 GN=ATY40_BA7504998 PE=3 SV=1	A0A1B2JIX7_PICPA	201 kDa	TRUE		unknown	0	0	1	0	0	1	0	0	0	0	0	0
230	TRUE	Empty	Cluster of tr|A0A1B2JBH3|A0A1B2JBH3_PICPA-DECOY	tr|A0A1B2JBH3|A0A1B2JBH3_PICPA-DECOY	?	TRUE		unknown	1	0	2	0	0	1	0	1	0	1	0	0
230.1	TRUE	Empty	tr|A0A1B2JBH3|A0A1B2JBH3_PICPA-DECOY	tr|A0A1B2JBH3|A0A1B2JBH3_PICPA-DECOY	?	TRUE		unknown	1	0	2	0	0	1	0	1	0	1	0	0
230.2	TRUE	Empty	tr|C4R7M5|C4R7M5_KOMPG-DECOY	tr|C4R7M5|C4R7M5_KOMPG-DECOY (+1)	?	TRUE		unknown	1	0	2	0	0	1	0	1	0	1	0	0
231	TRUE	Empty	Cluster of tr|C4R4U5|C4R4U5_KOMPG-DECOY	tr|C4R4U5|C4R4U5_KOMPG-DECOY [3]	?	TRUE		unknown	4	0	0	0	3	2	0	1	0	3	0	0
231.1	TRUE	Empty	tr|C4R4U5|C4R4U5_KOMPG-DECOY	tr|C4R4U5|C4R4U5_KOMPG-DECOY (+1)	?	TRUE		unknown	3	0	0	0	3	1	0	1	0	2	0	0
231.2	TRUE	Empty	tr|A0A1B2J575|A0A1B2J575_PICPA-DECOY	tr|A0A1B2J575|A0A1B2J575_PICPA-DECOY	?	TRUE		unknown	2	0	0	0	3	1	0	0	0	2	0	0
232	TRUE	Empty	Cluster of Phosphotransferase OS=Komagataella pastoris OX=4922 GN=ATY40_BA7504699 PE=3 SV=1 (A0A1B2JHD7_PICPA)	A0A1B2JHD7_PICPA [3]	52 kDa	TRUE		unknown	2	9	0	0	0	4	5	2	0	1	13	5
232.1	TRUE	Empty	Phosphotransferase OS=Komagataella pastoris OX=4922 GN=ATY40_BA7504699 PE=3 SV=1	A0A1B2JHD7_PICPA	52 kDa	TRUE		unknown	2	9	0	0	0	4	5	1	0	0	11	5
232.2	TRUE	Empty	Phosphotransferase OS=Komagataella phaffii (strain GS115 / ATCC 20864) OX=644223 GN=PAS_chr4_0624 PE=3 SV=1	C4R8F9_KOMPG (+1)	52 kDa	TRUE		unknown	1	9	0	0	0	0	5	2	0	1	13	5
233	TRUE	Empty	THO complex subunit 2 OS=Komagataella phaffii (strain GS115 / ATCC 20864) OX=644223 GN=PAS_chr1-1_0255 PE=3 SV=1	C4QWK2_KOMPG (+1)	189 kDa	TRUE		unknown	1	0	1	0	2	1	0	0	0	1	1	0
234	TRUE	Empty	Cluster of tr|C4QVX5|C4QVX5_KOMPG-DECOY	tr|C4QVX5|C4QVX5_KOMPG-DECOY	?	TRUE		unknown	2	0	0	1	4	2	0	0	0	2	0	0
234.1	TRUE	Empty	tr|C4QVX5|C4QVX5_KOMPG-DECOY	tr|C4QVX5|C4QVX5_KOMPG-DECOY (+1)	?	TRUE		unknown	2	0	0	1	1	1	0	0	0	1	0	0
234.2	TRUE	Empty	tr|A0A1B2J6F2|A0A1B2J6F2_PICPA-DECOY	tr|A0A1B2J6F2|A0A1B2J6F2_PICPA-DECOY	?	TRUE		unknown	2	0	0	1	4	2	0	0	0	2	0	0
235	TRUE	Empty	Cluster of tr|A0A1B2JCM5|A0A1B2JCM5_PICPA-DECOY	tr|A0A1B2JCM5|A0A1B2JCM5_PICPA-DECOY [2]	?	TRUE		unknown	0	0	0	0	1	1	0	0	0	2	1	0
235.1	TRUE	Empty	tr|A0A1B2JCM5|A0A1B2JCM5_PICPA-DECOY	tr|A0A1B2JCM5|A0A1B2JCM5_PICPA-DECOY	?	TRUE		unknown	0	0	0	0	1	1	0	0	0	1	1	0
235.2	TRUE	Empty	tr|C4R221|C4R221_KOMPG-DECOY	tr|C4R221|C4R221_KOMPG-DECOY (+1)	?	TRUE		unknown	0	0	0	0	1	1	0	0	0	2	0	0
236	TRUE	Empty	Cluster of Spindle pole body component OS=Komagataella phaffii (strain GS115 / ATCC 20864) OX=644223 GN=PAS_chr2-1_0377 PE=3 SV=1 (C4R0H5_KOMPG)	C4R0H5_KOMPG	94 kDa	TRUE		unknown	1	0	0	0	0	5	0	1	1	4	0	0
236.1	TRUE	Empty	Spindle pole body component OS=Komagataella phaffii (strain GS115 / ATCC 20864) OX=644223 GN=PAS_chr2-1_0377 PE=3 SV=1	C4R0H5_KOMPG	94 kDa	TRUE		unknown	1	0	0	0	0	5	0	1	1	4	0	0
236.2	TRUE	Empty	Spindle pole body component OS=Komagataella phaffii (strain ATCC 76273 / CBS 7435 / CECT 11047 / NRRL Y-11430 / Wegner 21-1) OX=981350 GN=SPC97 PE=3 SV=1	F2QT74_KOMPC	90 kDa	TRUE		unknown	1	0	0	0	0	5	0	0	1	4	0	0
237	TRUE	Empty	Cluster of Component of the GARP (Golgi-associated retrograde protein) complex OS=Komagataella phaffii (strain GS115 / ATCC 20864) OX=644223 GN=PAS_chr1-1_0314 PE=3 SV=1 (C4QWR8_KOMPG)	C4QWR8_KOMPG [2]	155 kDa	TRUE		unknown	0	0	1	0	4	0	0	0	3	1	1	0
237.1	TRUE	Empty	Component of the GARP (Golgi-associated retrograde protein) complex OS=Komagataella phaffii (strain GS115 / ATCC 20864) OX=644223 GN=PAS_chr1-1_0314 PE=3 SV=1	C4QWR8_KOMPG (+1)	155 kDa	TRUE		unknown	0	0	1	0	4	0	0	0	2	1	1	0
237.2	TRUE	Empty	BA75_01220T0 OS=Komagataella pastoris OX=4922 GN=VPS54 PE=3 SV=1	A0A1B2J657_PICPA	157 kDa	TRUE		unknown	0	0	1	0	0	0	0	0	1	1	1	0
238	TRUE	Empty	Cluster of glutamate synthase (NADH) OS=Komagataella pastoris OX=4922 GN=GLT1 PE=3 SV=1 (A0A1B2JEV0_PICPA)	A0A1B2JEV0_PICPA	237 kDa	TRUE		unknown	2	0	0	1	3	3	0	0	0	1	1	0
238.1	TRUE	Empty	glutamate synthase (NADH) OS=Komagataella pastoris OX=4922 GN=GLT1 PE=3 SV=1	A0A1B2JEV0_PICPA	237 kDa	TRUE		unknown	2	0	0	1	3	3	0	0	0	1	1	0
238.2	TRUE	Empty	glutamate synthase (NADH) OS=Komagataella phaffii (strain ATCC 76273 / CBS 7435 / CECT 11047 / NRRL Y-11430 / Wegner 21-1) OX=981350 GN=GLT1 PE=3 SV=1	A0A1G4KQ78_KOMPC (+1)	237 kDa	TRUE		unknown	2	0	0	1	1	3	0	0	0	1	1	0
239	TRUE	Empty	Cluster of tr|A0A1B2J6N7|A0A1B2J6N7_PICPA-DECOY	tr|A0A1B2J6N7|A0A1B2J6N7_PICPA-DECOY	?	TRUE		unknown	0	0	1	0	3	0	0	0	1	3	0	0
239.1	TRUE	Empty	tr|A0A1B2J6N7|A0A1B2J6N7_PICPA-DECOY	tr|A0A1B2J6N7|A0A1B2J6N7_PICPA-DECOY	?	TRUE		unknown	0	0	1	0	3	0	0	0	1	3	0	0
239.2	TRUE	Empty	tr|F2QX04|F2QX04_KOMPC-DECOY	tr|F2QX04|F2QX04_KOMPC-DECOY	?	TRUE		unknown	0	0	1	0	3	0	0	0	0	3	0	0
240	TRUE	Empty	Cluster of Translation initiation factor eIF4G, subunit of the mRNA cap-binding protein complex (eIF4F) OS=Komagataella phaffii (strain GS115 / ATCC 20864) OX=644223 GN=PAS_chr1-1_0053 PE=4 SV=1 (C4QVY8_KOMPG)	C4QVY8_KOMPG [2]	121 kDa	TRUE		unknown	0	0	0	0	2	0	0	0	0	1	0	0
240.1	TRUE	Empty	Translation initiation factor eIF4G, subunit of the mRNA cap-binding protein complex (eIF4F) OS=Komagataella phaffii (strain GS115 / ATCC 20864) OX=644223 GN=PAS_chr1-1_0053 PE=4 SV=1	C4QVY8_KOMPG (+1)	121 kDa	TRUE		unknown	0	0	0	0	2	0	0	0	0	1	0	0
240.2	TRUE	Empty	BA75_01499T0 OS=Komagataella pastoris OX=4922 GN=ATY40_BA7501499 PE=4 SV=1	A0A1B2J5Y1_PICPA	122 kDa	TRUE		unknown	0	0	0	0	1	0	0	0	0	1	0	0
241	TRUE	Empty	Cluster of tr|F2QT34|F2QT34_KOMPC-DECOY	tr|F2QT34|F2QT34_KOMPC-DECOY	?	TRUE		unknown	0	0	1	1	4	1	0	1	1	0	0	0
241.1	TRUE	Empty	tr|F2QT34|F2QT34_KOMPC-DECOY	tr|F2QT34|F2QT34_KOMPC-DECOY (+1)	?	TRUE		unknown	0	0	1	1	3	1	0	1	1	0	0	0
241.2	TRUE	Empty	tr|A0A1B2JBR9|A0A1B2JBR9_PICPA-DECOY	tr|A0A1B2JBR9|A0A1B2JBR9_PICPA-DECOY	?	TRUE		unknown	0	0	1	1	4	1	0	1	1	0	0	0
242	TRUE	Empty	Cluster of BA75_01675T0 OS=Komagataella pastoris OX=4922 GN=CFT1 PE=4 SV=1 (A0A1B2J998_PICPA)	A0A1B2J998_PICPA [2]	156 kDa	TRUE		unknown	2	0	1	1	2	2	0	0	0	1	1	0
242.1	TRUE	Empty	BA75_01675T0 OS=Komagataella pastoris OX=4922 GN=CFT1 PE=4 SV=1	A0A1B2J998_PICPA	156 kDa	TRUE		unknown	1	0	1	1	1	2	0	0	0	1	0	0
242.2	TRUE	Empty	RNA-binding subunit of the mRNA cleavage and polyadenylation factor OS=Komagataella phaffii (strain GS115 / ATCC 20864) OX=644223 GN=PAS_chr1-3_0183 PE=4 SV=1	C4QVH3_KOMPG (+1)	156 kDa	TRUE		unknown	2	0	1	0	1	2	0	0	0	1	1	0
243	TRUE	Empty	Cluster of ATP-dependent RNA helicase OS=Komagataella phaffii (strain ATCC 76273 / CBS 7435 / CECT 11047 / NRRL Y-11430 / Wegner 21-1) OX=981350 GN=ECM16 PE=4 SV=1 (A0A1G4KQI7_KOMPC)	A0A1G4KQI7_KOMPC [3]	144 kDa	TRUE		unknown	0	0	3	3	7	1	0	0	0	0	1	0
243.1	TRUE	Empty	ATP-dependent RNA helicase OS=Komagataella phaffii (strain ATCC 76273 / CBS 7435 / CECT 11047 / NRRL Y-11430 / Wegner 21-1) OX=981350 GN=ECM16 PE=4 SV=1	A0A1G4KQI7_KOMPC (+1)	144 kDa	TRUE		unknown	0	0	2	3	5	0	0	0	0	0	1	0
243.2	TRUE	Empty	BA75_00364T0 OS=Komagataella pastoris OX=4922 GN=ECM16 PE=4 SV=1	A0A1B2J9V9_PICPA	144 kDa	TRUE		unknown	0	0	2	0	3	1	0	0	0	0	0	0
244	TRUE	Empty	Cluster of Uncharacterized protein OS=Komagataella phaffii (strain GS115 / ATCC 20864) OX=644223 GN=PAS_chr2-1_0276 PE=4 SV=1 (C4R066_KOMPG)	C4R066_KOMPG [3]	85 kDa	TRUE		unknown	4	0	1	0	5	1	0	0	0	5	2	0
244.1	TRUE	Empty	Uncharacterized protein OS=Komagataella phaffii (strain GS115 / ATCC 20864) OX=644223 GN=PAS_chr2-1_0276 PE=4 SV=1	C4R066_KOMPG (+1)	85 kDa	TRUE		unknown	0	0	0	0	3	1	0	0	0	4	1	0
244.2	TRUE	Empty	BA75_04984T0 OS=Komagataella pastoris OX=4922 GN=SLK19 PE=4 SV=1	A0A1B2JJ98_PICPA	85 kDa	TRUE		unknown	4	0	1	0	4	0	0	0	0	3	1	0
245	TRUE	Empty	Cluster of BA75_00567T0 OS=Komagataella pastoris OX=4922 GN=MDM1 PE=3 SV=1 (A0A1B2J575_PICPA)	A0A1B2J575_PICPA [2]	118 kDa	TRUE		unknown	0	0	0	0	3	1	0	0	1	1	1	0
245.1	TRUE	Empty	BA75_00567T0 OS=Komagataella pastoris OX=4922 GN=MDM1 PE=3 SV=1	A0A1B2J575_PICPA	118 kDa	TRUE		unknown	0	0	0	0	1	1	0	0	1	0	1	0
245.2	TRUE	Empty	Intermediate filament protein OS=Komagataella phaffii (strain GS115 / ATCC 20864) OX=644223 GN=PAS_chr3_0532 PE=3 SV=1	C4R4U5_KOMPG (+1)	118 kDa	TRUE		unknown	0	0	0	0	3	0	0	0	1	1	0	0
246	TRUE	Empty	Cluster of sp|C4R360|PSD2_KOMPG-DECOY	sp|C4R360|PSD2_KOMPG-DECOY	?	TRUE		unknown	5	0	0	0	3	3	0	0	0	13	3	0
246.1	TRUE	Empty	sp|C4R360|PSD2_KOMPG-DECOY	sp|C4R360|PSD2_KOMPG-DECOY	?	TRUE		unknown	5	0	0	0	3	3	0	0	0	13	3	0
246.2	TRUE	Empty	tr|F2QUD2|F2QUD2_KOMPC-DECOY	tr|F2QUD2|F2QUD2_KOMPC-DECOY	?	TRUE		unknown	0	0	0	0	0	0	0	0	0	0	0	0
247	TRUE	Empty	tr|F2QX87|F2QX87_KOMPC-DECOY	tr|F2QX87|F2QX87_KOMPC-DECOY	?	TRUE		unknown	3	0	0	1	3	1	1	1	3	5	2	0
248	TRUE	Empty	Cluster of tr|C4R4I4|C4R4I4_KOMPG-DECOY	tr|C4R4I4|C4R4I4_KOMPG-DECOY [3]	?	TRUE		unknown	4	0	1	1	3	2	0	0	1	2	3	0
248.1	TRUE	Empty	tr|C4R4I4|C4R4I4_KOMPG-DECOY	tr|C4R4I4|C4R4I4_KOMPG-DECOY (+1)	?	TRUE		unknown	4	0	1	1	3	2	0	0	1	2	2	0
248.2	TRUE	Empty	tr|A0A1B2J7R6|A0A1B2J7R6_PICPA-DECOY	tr|A0A1B2J7R6|A0A1B2J7R6_PICPA-DECOY	?	TRUE		unknown	4	0	1	0	3	2	0	0	1	2	3	0
249	TRUE	Empty	Cluster of tr|C4QZ04|C4QZ04_KOMPG-DECOY	tr|C4QZ04|C4QZ04_KOMPG-DECOY [3]	?	TRUE		unknown	1	0	2	2	1	2	0	0	1	2	0	0
249.1	TRUE	Empty	tr|C4QZ04|C4QZ04_KOMPG-DECOY	tr|C4QZ04|C4QZ04_KOMPG-DECOY (+1)	?	TRUE		unknown	0	0	2	1	1	2	0	0	1	1	0	0
249.2	TRUE	Empty	tr|A0A1B2JG71|A0A1B2JG71_PICPA-DECOY	tr|A0A1B2JG71|A0A1B2JG71_PICPA-DECOY	?	TRUE		unknown	1	0	1	1	1	1	0	0	1	2	0	0
250	TRUE	Empty	Cluster of tr|C4R840|C4R840_KOMPG-DECOY	tr|C4R840|C4R840_KOMPG-DECOY [2]	?	TRUE		unknown	1	0	3	0	1	2	0	0	0	0	2	0
250.1	TRUE	Empty	tr|C4R840|C4R840_KOMPG-DECOY	tr|C4R840|C4R840_KOMPG-DECOY (+1)	?	TRUE		unknown	1	0	3	0	1	2	0	0	0	0	0	0
250.2	TRUE	Empty	tr|A0A1B2JHU8|A0A1B2JHU8_PICPA-DECOY	tr|A0A1B2JHU8|A0A1B2JHU8_PICPA-DECOY	?	TRUE		unknown	0	0	2	0	0	1	0	0	0	0	2	0
251	TRUE	Empty	Cluster of tr|C4R0Q0|C4R0Q0_KOMPG-DECOY	tr|C4R0Q0|C4R0Q0_KOMPG-DECOY	?	TRUE		unknown	0	0	0	0	1	2	0	0	0	2	0	0
251.1	TRUE	Empty	tr|C4R0Q0|C4R0Q0_KOMPG-DECOY	tr|C4R0Q0|C4R0Q0_KOMPG-DECOY (+1)	?	TRUE		unknown	0	0	0	0	1	1	0	0	0	1	0	0
251.2	TRUE	Empty	tr|A0A1B2JAW6|A0A1B2JAW6_PICPA-DECOY	tr|A0A1B2JAW6|A0A1B2JAW6_PICPA-DECOY	?	TRUE		unknown	0	0	0	0	1	1	0	0	0	2	0	0
252	TRUE	Empty	tr|A0A1B2J5M7|A0A1B2J5M7_PICPA-DECOY	tr|A0A1B2J5M7|A0A1B2J5M7_PICPA-DECOY	?	TRUE		unknown	0	0	0	0	6	0	0	0	2	1	0	0
253	TRUE	Empty	tr|A0A1B2JFY8|A0A1B2JFY8_PICPA-DECOY	tr|A0A1B2JFY8|A0A1B2JFY8_PICPA-DECOY	?	TRUE		unknown	0	0	1	0	0	5	0	0	1	2	2	0
254	TRUE	Empty	Cluster of tr|A0A1B2J9U0|A0A1B2J9U0_PICPA-DECOY	tr|A0A1B2J9U0|A0A1B2J9U0_PICPA-DECOY [3]	?	TRUE		unknown	1	0	1	1	4	4	0	0	1	3	3	0
254.1	TRUE	Empty	tr|A0A1B2J9U0|A0A1B2J9U0_PICPA-DECOY	tr|A0A1B2J9U0|A0A1B2J9U0_PICPA-DECOY	?	TRUE		unknown	1	0	1	1	3	2	0	0	1	3	3	0
254.2	TRUE	Empty	tr|C4R4A2|C4R4A2_KOMPG-DECOY	tr|C4R4A2|C4R4A2_KOMPG-DECOY (+1)	?	TRUE		unknown	0	0	0	1	4	3	0	0	0	1	2	0
255	TRUE	Empty	Cluster of tr|A0A1B2J7V7|A0A1B2J7V7_PICPA-DECOY	tr|A0A1B2J7V7|A0A1B2J7V7_PICPA-DECOY [2]	?	TRUE		unknown	0	0	0	2	3	3	0	0	1	0	0	0
255.1	TRUE	Empty	tr|A0A1B2J7V7|A0A1B2J7V7_PICPA-DECOY	tr|A0A1B2J7V7|A0A1B2J7V7_PICPA-DECOY	?	TRUE		unknown	0	0	0	2	2	1	0	0	1	0	0	0
255.2	TRUE	Empty	tr|C4R3Z6|C4R3Z6_KOMPG-DECOY	tr|C4R3Z6|C4R3Z6_KOMPG-DECOY (+1)	?	TRUE		unknown	0	0	0	2	1	3	0	0	0	0	0	0
256	TRUE	Empty	Cluster of Polo-like kinase OS=Komagataella phaffii (strain ATCC 76273 / CBS 7435 / CECT 11047 / NRRL Y-11430 / Wegner 21-1) OX=981350 GN=CDC5 PE=4 SV=1 (A0A1G4KQJ5_KOMPC)	A0A1G4KQJ5_KOMPC	76 kDa	TRUE		unknown	0	0	4	3	7	1	0	0	2	5	1	0
256.1	TRUE	Empty	Polo-like kinase OS=Komagataella phaffii (strain ATCC 76273 / CBS 7435 / CECT 11047 / NRRL Y-11430 / Wegner 21-1) OX=981350 GN=CDC5 PE=4 SV=1	A0A1G4KQJ5_KOMPC	76 kDa	TRUE		unknown	0	0	4	3	7	1	0	0	2	5	1	0
256.2	TRUE	Empty	Serine/threonine-protein kinase OS=Komagataella pastoris OX=4922 GN=CDC5 PE=3 SV=1	A0A1B2J6F6_PICPA	77 kDa	TRUE		unknown	0	0	4	3	7	1	0	0	2	4	1	0
257	TRUE	Empty	Cluster of Alpha-aminoadipate reductase OS=Komagataella pastoris OX=4922 GN=LYS2 PE=3 SV=1 (A0A1B2J7Q9_PICPA)	A0A1B2J7Q9_PICPA	156 kDa	TRUE		unknown	1	0	0	0	1	0	0	1	1	2	0	0
257.1	TRUE	Empty	Alpha-aminoadipate reductase OS=Komagataella pastoris OX=4922 GN=LYS2 PE=3 SV=1	A0A1B2J7Q9_PICPA	156 kDa	TRUE		unknown	0	0	0	0	0	0	0	0	1	1	0	0
257.2	TRUE	Empty	Alpha-aminoadipate reductase OS=Komagataella phaffii (strain GS115 / ATCC 20864) OX=644223 GN=PAS_chr1-4_0153 PE=3 SV=1	C4QXL0_KOMPG (+1)	156 kDa	TRUE		unknown	1	0	0	0	1	0	0	1	1	1	0	0
258	TRUE	Empty	Cluster of tr|A0A1B2JET9|A0A1B2JET9_PICPA-DECOY	tr|A0A1B2JET9|A0A1B2JET9_PICPA-DECOY	?	TRUE		unknown	0	0	2	2	3	2	0	0	0	4	1	0
258.1	TRUE	Empty	tr|A0A1B2JET9|A0A1B2JET9_PICPA-DECOY	tr|A0A1B2JET9|A0A1B2JET9_PICPA-DECOY	?	TRUE		unknown	0	0	2	0	2	2	0	0	0	4	1	0
258.2	TRUE	Empty	tr|C4R5A8|C4R5A8_KOMPG-DECOY	tr|C4R5A8|C4R5A8_KOMPG-DECOY	?	TRUE		unknown	0	0	1	2	3	2	0	0	0	1	1	0
258.3	TRUE	Empty	tr|A0A1G4KQC0|A0A1G4KQC0_KOMPC-DECOY	tr|A0A1G4KQC0|A0A1G4KQC0_KOMPC-DECOY	?	TRUE		unknown	0	0	1	2	3	2	0	0	0	1	1	0
259	TRUE	Empty	Cluster of tr|C4R1X8|C4R1X8_KOMPG-DECOY	tr|C4R1X8|C4R1X8_KOMPG-DECOY [2]	?	TRUE		unknown	3	1	0	1	0	2	0	0	0	2	0	0
259.1	TRUE	Empty	tr|C4R1X8|C4R1X8_KOMPG-DECOY	tr|C4R1X8|C4R1X8_KOMPG-DECOY (+1)	?	TRUE		unknown	3	1	0	1	0	2	0	0	0	2	0	0
259.2	TRUE	Empty	tr|A0A1B2JB45|A0A1B2JB45_PICPA-DECOY	tr|A0A1B2JB45|A0A1B2JB45_PICPA-DECOY	?	TRUE		unknown	3	1	0	1	0	2	0	0	0	2	0	0
260	TRUE	Empty	tr|A0A1B2JDC0|A0A1B2JDC0_PICPA-DECOY	tr|A0A1B2JDC0|A0A1B2JDC0_PICPA-DECOY	?	TRUE		unknown	3	0	0	1	2	2	0	0	1	2	1	0
261	TRUE	Empty	tr|C4R0V7|C4R0V7_KOMPG-DECOY	tr|C4R0V7|C4R0V7_KOMPG-DECOY (+1)	?	TRUE		unknown	0	0	0	0	3	3	0	1	2	2	1	0
262	TRUE	Empty	tr|A0A1B2J8R7|A0A1B2J8R7_PICPA-DECOY	tr|A0A1B2J8R7|A0A1B2J8R7_PICPA-DECOY	?	TRUE		unknown	2	0	0	1	4	0	0	0	1	0	1	0
263	TRUE	Empty	Cluster of Ribosome quality control complex subunit 2 OS=Komagataella phaffii (strain GS115 / ATCC 20864) OX=644223 GN=PAS_chr1-4_0316 PE=3 SV=1 (C4QY34_KOMPG)	C4QY34_KOMPG [3]	115 kDa	TRUE		unknown	0	0	1	1	3	4	0	0	2	3	0	0
263.1	TRUE	Empty	Ribosome quality control complex subunit 2 OS=Komagataella phaffii (strain GS115 / ATCC 20864) OX=644223 GN=PAS_chr1-4_0316 PE=3 SV=1	C4QY34_KOMPG (+1)	115 kDa	TRUE		unknown	0	0	0	1	3	3	0	0	1	3	0	0
263.2	TRUE	Empty	BA75_00745T0 OS=Komagataella pastoris OX=4922 GN=TAE2 PE=3 SV=1	A0A1B2J7T3_PICPA	115 kDa	TRUE		unknown	0	0	1	1	3	3	0	0	1	1	0	0
264	TRUE	Empty	Cluster of tr|A0A1B2JBT2|A0A1B2JBT2_PICPA-DECOY	tr|A0A1B2JBT2|A0A1B2JBT2_PICPA-DECOY	?	TRUE		unknown	2	0	0	0	1	1	0	0	1	2	0	0
264.1	TRUE	Empty	tr|A0A1B2JBT2|A0A1B2JBT2_PICPA-DECOY	tr|A0A1B2JBT2|A0A1B2JBT2_PICPA-DECOY	?	TRUE		unknown	2	0	0	0	1	0	0	0	1	1	0	0
264.2	TRUE	Empty	tr|C4R1I3|C4R1I3_KOMPG-DECOY	tr|C4R1I3|C4R1I3_KOMPG-DECOY (+1)	?	TRUE		unknown	1	0	0	0	0	1	0	0	0	1	0	0
265	TRUE	Empty	Cluster of Protein interacting with poly(A)-binding protein Pab1p OS=Komagataella phaffii (strain GS115 / ATCC 20864) OX=644223 GN=PAS_chr4_0288 PE=4 SV=1 (C4R7F0_KOMPG)	C4R7F0_KOMPG	74 kDa	TRUE		unknown	0	0	0	0	2	0	0	2	0	0	1	0
265.1	TRUE	Empty	Protein interacting with poly(A)-binding protein Pab1p OS=Komagataella phaffii (strain GS115 / ATCC 20864) OX=644223 GN=PAS_chr4_0288 PE=4 SV=1	C4R7F0_KOMPG (+1)	74 kDa	TRUE		unknown	0	0	0	0	2	0	0	1	0	0	1	0
265.2	TRUE	Empty	BA75_03007T0 OS=Komagataella pastoris OX=4922 GN=PBP1 PE=4 SV=1	A0A1B2JE02_PICPA	74 kDa	TRUE		unknown	0	0	0	0	0	0	0	1	0	0	0	0
266	TRUE	Empty	Cluster of tr|C4QZQ7|C4QZQ7_KOMPG-DECOY	tr|C4QZQ7|C4QZQ7_KOMPG-DECOY	?	TRUE		unknown	2	0	0	0	0	0	0	0	0	0	0	0
266.1	TRUE	Empty	tr|C4QZQ7|C4QZQ7_KOMPG-DECOY	tr|C4QZQ7|C4QZQ7_KOMPG-DECOY (+1)	?	TRUE		unknown	2	0	0	0	0	0	0	0	0	0	0	0
266.2	TRUE	Empty	tr|I7B0D6|I7B0D6_PICPA-DECOY	tr|I7B0D6|I7B0D6_PICPA-DECOY	?	TRUE		unknown	2	0	0	0	0	0	0	0	0	0	0	0
266.3	TRUE	Empty	tr|A0A1B2JHN1|A0A1B2JHN1_PICPA-DECOY	tr|A0A1B2JHN1|A0A1B2JHN1_PICPA-DECOY	?	TRUE		unknown	2	0	0	0	0	0	0	0	0	0	0	0
267	TRUE	Empty	non-specific serine/threonine protein kinase OS=Komagataella pastoris OX=4922 GN=PKH3 PE=3 SV=1	A0A1B2J8Y5_PICPA	91 kDa	TRUE		unknown	2	0	4	2	3	3	0	0	0	3	1	0
268	TRUE	Empty	Cluster of tr|A0A1B2J6P3|A0A1B2J6P3_PICPA-DECOY	tr|A0A1B2J6P3|A0A1B2J6P3_PICPA-DECOY	?	TRUE		unknown	1	0	0	0	1	1	0	0	1	2	1	0
268.1	TRUE	Empty	tr|A0A1B2J6P3|A0A1B2J6P3_PICPA-DECOY	tr|A0A1B2J6P3|A0A1B2J6P3_PICPA-DECOY	?	TRUE		unknown	0	0	0	0	0	0	0	0	0	1	0	0
268.2	TRUE	Empty	tr|A0A1G4KQG0|A0A1G4KQG0_KOMPC-DECOY	tr|A0A1G4KQG0|A0A1G4KQG0_KOMPC-DECOY	?	TRUE		unknown	1	0	0	0	1	1	0	0	1	2	1	0
268.3	TRUE	Empty	tr|C4R4P7|C4R4P7_KOMPG-DECOY	tr|C4R4P7|C4R4P7_KOMPG-DECOY	?	TRUE		unknown	1	0	0	0	1	0	0	0	1	1	1	0
269	TRUE	Empty	Cluster of tr|C4R066|C4R066_KOMPG-DECOY	tr|C4R066|C4R066_KOMPG-DECOY [3]	?	TRUE		unknown	3	0	2	0	0	1	0	0	1	4	1	0
269.1	TRUE	Empty	tr|C4R066|C4R066_KOMPG-DECOY	tr|C4R066|C4R066_KOMPG-DECOY (+1)	?	TRUE		unknown	2	0	1	0	0	1	0	0	1	4	1	0
269.2	TRUE	Empty	tr|A0A1B2JJ98|A0A1B2JJ98_PICPA-DECOY	tr|A0A1B2JJ98|A0A1B2JJ98_PICPA-DECOY	?	TRUE		unknown	3	0	1	0	0	1	0	0	1	2	0	0
270	TRUE	Empty	Cluster of tr|C4QYR2|C4QYR2_KOMPG-DECOY	tr|C4QYR2|C4QYR2_KOMPG-DECOY [3]	?	TRUE		unknown	1	0	1	0	3	1	0	0	0	1	0	0
270.1	TRUE	Empty	tr|C4QYR2|C4QYR2_KOMPG-DECOY	tr|C4QYR2|C4QYR2_KOMPG-DECOY (+1)	?	TRUE		unknown	1	0	1	0	2	0	0	0	0	1	0	0
270.2	TRUE	Empty	tr|A0A1B2JEE1|A0A1B2JEE1_PICPA-DECOY	tr|A0A1B2JEE1|A0A1B2JEE1_PICPA-DECOY	?	TRUE		unknown	0	0	1	0	2	1	0	0	0	0	0	0
271	TRUE	Empty	Cluster of BA75_02652T0 OS=Komagataella pastoris OX=4922 GN=STI1 PE=4 SV=1 (A0A1B2JA75_PICPA)	A0A1B2JA75_PICPA	64 kDa	TRUE		unknown	0	0	1	0	1	2	0	0	0	1	0	0
271.1	TRUE	Empty	BA75_02652T0 OS=Komagataella pastoris OX=4922 GN=STI1 PE=4 SV=1	A0A1B2JA75_PICPA	64 kDa	TRUE		unknown	0	0	1	0	1	2	0	0	0	1	0	0
271.2	TRUE	Empty	Hsp90 cochaperone, interacts with the Ssa group of the cytosolic Hsp70 chaperones OS=Komagataella phaffii (strain GS115 / ATCC 20864) OX=644223 GN=PAS_chr2-1_0518 PE=4 SV=1	C4R0X7_KOMPG (+1)	63 kDa	TRUE		unknown	0	0	1	0	0	1	0	0	0	1	0	0
272	TRUE	Empty	tr|C4QZ39|C4QZ39_KOMPG-DECOY	tr|C4QZ39|C4QZ39_KOMPG-DECOY	?	TRUE		unknown	3	0	1	1	5	2	0	0	2	4	1	0
273	TRUE	Empty	Cluster of tr|C4R370|C4R370_KOMPG-DECOY	tr|C4R370|C4R370_KOMPG-DECOY [3]	?	TRUE		unknown	0	0	1	1	4	0	0	0	2	1	3	0
273.1	TRUE	Empty	tr|C4R370|C4R370_KOMPG-DECOY	tr|C4R370|C4R370_KOMPG-DECOY (+1)	?	TRUE		unknown	0	0	1	0	2	0	0	0	0	1	3	0
273.2	TRUE	Empty	tr|A0A1B2JEY5|A0A1B2JEY5_PICPA-DECOY	tr|A0A1B2JEY5|A0A1B2JEY5_PICPA-DECOY	?	TRUE		unknown	0	0	1	1	3	0	0	0	2	1	2	0
274	TRUE	Empty	Cluster of Mitochondrial alcohol dehydrogenase isozyme III OS=Komagataella phaffii (strain GS115 / ATCC 20864) OX=644223 GN=PAS_chr2-1_0472 PE=1 SV=1 (C4R0S8_KOMPG)	C4R0S8_KOMPG [3]	37 kDa	TRUE		unknown	9	6	1	2	5	4	7	19	2	0	3	19
274.1	TRUE	Empty	Mitochondrial alcohol dehydrogenase isozyme III OS=Komagataella phaffii (strain GS115 / ATCC 20864) OX=644223 GN=PAS_chr2-1_0472 PE=1 SV=1	C4R0S8_KOMPG (+2)	37 kDa	TRUE		unknown	9	6	1	2	5	4	7	19	2	0	3	19
274.2	TRUE	Empty	BA75_02702T0 OS=Komagataella pastoris OX=4922 GN=ADH2 PE=3 SV=1	A0A1B2JBQ8_PICPA	37 kDa	TRUE		unknown	6	4	1	2	3	2	3	9	1	0	1	13
275	TRUE	Empty	Cluster of tr|A0A1B2J9S0|A0A1B2J9S0_PICPA-DECOY	tr|A0A1B2J9S0|A0A1B2J9S0_PICPA-DECOY	?	TRUE		unknown	0	0	0	2	0	3	0	0	1	2	0	0
275.1	TRUE	Empty	tr|A0A1B2J9S0|A0A1B2J9S0_PICPA-DECOY	tr|A0A1B2J9S0|A0A1B2J9S0_PICPA-DECOY	?	TRUE		unknown	0	0	0	1	0	3	0	0	1	1	0	0
275.2	TRUE	Empty	tr|C4R4T6|C4R4T6_KOMPG-DECOY	tr|C4R4T6|C4R4T6_KOMPG-DECOY	?	TRUE		unknown	0	0	0	2	0	1	0	0	1	2	0	0
275.3	TRUE	Empty	tr|F2QW61|F2QW61_KOMPC-DECOY	tr|F2QW61|F2QW61_KOMPC-DECOY	?	TRUE		unknown	0	0	0	2	0	1	0	0	1	2	0	0
276	TRUE	Empty	Cluster of tr|A0A1B2JCQ9|A0A1B2JCQ9_PICPA-DECOY	tr|A0A1B2JCQ9|A0A1B2JCQ9_PICPA-DECOY [3]	?	TRUE		unknown	0	0	1	0	2	2	0	0	0	0	0	0
276.1	TRUE	Empty	tr|A0A1B2JCQ9|A0A1B2JCQ9_PICPA-DECOY	tr|A0A1B2JCQ9|A0A1B2JCQ9_PICPA-DECOY	?	TRUE		unknown	0	0	1	0	2	1	0	0	0	0	0	0
276.2	TRUE	Empty	tr|C4R1N6|C4R1N6_KOMPG-DECOY	tr|C4R1N6|C4R1N6_KOMPG-DECOY (+1)	?	TRUE		unknown	0	0	0	0	1	2	0	0	0	0	0	0
277	TRUE	Empty	Cluster of tr|A0A1B2JH74|A0A1B2JH74_PICPA-DECOY	tr|A0A1B2JH74|A0A1B2JH74_PICPA-DECOY [3]	?	TRUE		unknown	2	0	0	0	1	1	0	0	2	3	2	0
277.1	TRUE	Empty	tr|A0A1B2JH74|A0A1B2JH74_PICPA-DECOY	tr|A0A1B2JH74|A0A1B2JH74_PICPA-DECOY	?	TRUE		unknown	2	0	0	0	1	1	0	0	0	3	2	0
277.2	TRUE	Empty	tr|C4R5G1|C4R5G1_KOMPG-DECOY	tr|C4R5G1|C4R5G1_KOMPG-DECOY (+1)	?	TRUE		unknown	0	0	0	0	1	1	0	0	2	2	0	0
278	TRUE	Empty	Cluster of tr|A0A1B2J623|A0A1B2J623_PICPA-DECOY	tr|A0A1B2J623|A0A1B2J623_PICPA-DECOY [3]	?	TRUE		unknown	1	0	1	0	4	2	0	1	1	4	0	0
278.1	TRUE	Empty	tr|A0A1B2J623|A0A1B2J623_PICPA-DECOY	tr|A0A1B2J623|A0A1B2J623_PICPA-DECOY	?	TRUE		unknown	1	0	1	0	4	1	0	1	1	3	0	0
278.2	TRUE	Empty	tr|F2QW04|F2QW04_KOMPC-DECOY	tr|F2QW04|F2QW04_KOMPC-DECOY (+1)	?	TRUE		unknown	0	0	0	0	2	1	0	1	0	2	0	0
279	TRUE	Empty	Cluster of tr|C4R7G6|C4R7G6_KOMPG-DECOY	tr|C4R7G6|C4R7G6_KOMPG-DECOY	?	TRUE		unknown	0	1	0	0	2	2	0	1	0	4	0	0
279.1	TRUE	Empty	tr|C4R7G6|C4R7G6_KOMPG-DECOY	tr|C4R7G6|C4R7G6_KOMPG-DECOY	?	TRUE		unknown	0	1	0	0	1	2	0	1	0	4	0	0
279.2	TRUE	Empty	tr|A0A1B2JCY8|A0A1B2JCY8_PICPA-DECOY	tr|A0A1B2JCY8|A0A1B2JCY8_PICPA-DECOY	?	TRUE		unknown	0	1	0	0	1	2	0	0	0	2	0	0
280	TRUE	Empty	Cluster of tr|A0A1B2JDA4|A0A1B2JDA4_PICPA-DECOY	tr|A0A1B2JDA4|A0A1B2JDA4_PICPA-DECOY	?	TRUE		unknown	1	0	2	1	1	0	0	0	0	2	0	0
280.1	TRUE	Empty	tr|A0A1B2JDA4|A0A1B2JDA4_PICPA-DECOY	tr|A0A1B2JDA4|A0A1B2JDA4_PICPA-DECOY	?	TRUE		unknown	0	0	2	1	1	0	0	0	0	1	0	0
280.2	TRUE	Empty	tr|F2QQU2|F2QQU2_KOMPC-DECOY	tr|F2QQU2|F2QQU2_KOMPC-DECOY	?	TRUE		unknown	1	0	0	1	1	0	0	0	0	2	0	0
280.3	TRUE	Empty	tr|C4R2Z0|C4R2Z0_KOMPG-DECOY	tr|C4R2Z0|C4R2Z0_KOMPG-DECOY	?	TRUE		unknown	1	0	0	0	0	0	0	0	0	2	0	0
281	TRUE	Empty	Cluster of tr|C4QYF7|C4QYF7_KOMPG-DECOY	tr|C4QYF7|C4QYF7_KOMPG-DECOY [2]	?	TRUE		unknown	2	2	1	0	2	0	0	0	2	2	1	0
281.1	TRUE	Empty	tr|C4QYF7|C4QYF7_KOMPG-DECOY	tr|C4QYF7|C4QYF7_KOMPG-DECOY (+1)	?	TRUE		unknown	2	2	1	0	2	0	0	0	2	2	0	0
281.2	TRUE	Empty	tr|A0A1B2JEA1|A0A1B2JEA1_PICPA-DECOY	tr|A0A1B2JEA1|A0A1B2JEA1_PICPA-DECOY	?	TRUE		unknown	0	0	1	0	0	0	0	0	2	0	1	0
282	TRUE	Empty	Cluster of tr|C4R7F0|C4R7F0_KOMPG-DECOY	tr|C4R7F0|C4R7F0_KOMPG-DECOY [2]	?	TRUE		unknown	0	0	0	0	2	0	0	0	0	1	0	0
282.1	TRUE	Empty	tr|C4R7F0|C4R7F0_KOMPG-DECOY	tr|C4R7F0|C4R7F0_KOMPG-DECOY (+1)	?	TRUE		unknown	0	0	0	0	2	0	0	0	0	1	0	0
282.2	TRUE	Empty	tr|A0A1B2JE02|A0A1B2JE02_PICPA-DECOY	tr|A0A1B2JE02|A0A1B2JE02_PICPA-DECOY	?	TRUE		unknown	0	0	0	0	1	0	0	0	0	1	0	0
283	TRUE	Empty	Cluster of tr|C4QVD4|C4QVD4_KOMPG-DECOY	tr|C4QVD4|C4QVD4_KOMPG-DECOY [2]	?	TRUE		unknown	0	1	2	2	2	0	0	0	0	1	2	0
283.1	TRUE	Empty	tr|C4QVD4|C4QVD4_KOMPG-DECOY	tr|C4QVD4|C4QVD4_KOMPG-DECOY (+1)	?	TRUE		unknown	0	1	1	2	2	0	0	0	0	1	2	0
283.2	TRUE	Empty	tr|A0A1B2J9G0|A0A1B2J9G0_PICPA-DECOY	tr|A0A1B2J9G0|A0A1B2J9G0_PICPA-DECOY	?	TRUE		unknown	0	0	1	2	2	0	0	0	0	0	0	0
284	TRUE	Empty	Cluster of Fatty acid synthase subunit alpha OS=Komagataella pastoris OX=4922 GN=FAS2 PE=3 SV=1 (A0A1B2J6J3_PICPA)	A0A1B2J6J3_PICPA [3]	206 kDa	TRUE		unknown	2	0	1	0	3	2	0	1	2	4	1	0
284.1	TRUE	Empty	Fatty acid synthase subunit alpha OS=Komagataella pastoris OX=4922 GN=FAS2 PE=3 SV=1	A0A1B2J6J3_PICPA	206 kDa	TRUE		unknown	1	0	1	0	2	2	0	0	2	4	1	0
284.2	TRUE	Empty	Fatty acid synthase subunit alpha OS=Komagataella phaffii (strain GS115 / ATCC 20864) OX=644223 GN=PAS_chr1-4_0295 PE=1 SV=1	C4QY10_KOMPG (+1)	206 kDa	TRUE		unknown	2	0	1	0	3	1	0	1	0	3	1	0
285	TRUE	Empty	Cluster of Elongation factor 1-alpha OS=Komagataella pastoris OX=4922 GN=TEF1 PE=3 SV=1 (A0A1B2JFK5_PICPA)	A0A1B2JFK5_PICPA [3]	50 kDa	TRUE		unknown	4	7	0	1	3	1	11	13	3	2	6	5
285.1	TRUE	Empty	Elongation factor 1-alpha OS=Komagataella pastoris OX=4922 GN=TEF1 PE=3 SV=1	A0A1B2JFK5_PICPA (+2)	50 kDa	TRUE		unknown	4	7	0	1	3	1	11	13	3	2	6	5
285.2	TRUE	Empty	Elongation factor 1-alpha OS=Komagataella pastoris OX=4922 PE=3 SV=1	A0FJH5_PICPA	50 kDa	TRUE		unknown	3	7	0	1	3	1	10	13	3	2	5	5
285.3	TRUE	Empty	Translation elongation factor 1-alpha (Fragment) OS=Komagataella pastoris OX=4922 PE=3 SV=1	A9QAD4_PICPA	34 kDa	TRUE		unknown	2	5	0	1	3	1	7	9	2	1	4	4
285.4	TRUE	Empty	Translation elongation factor 1-alpha (Fragment) OS=Komagataella sp. EN-2017b OX=2008545 GN=EF-1alpha PE=3 SV=1	A0A2H4ZK54_9ASCO	32 kDa	TRUE		unknown	0	0	0	1	0	0	0	0	0	0	0	0
286	TRUE	Empty	Cluster of tr|A0A1B2JC94|A0A1B2JC94_PICPA-DECOY	tr|A0A1B2JC94|A0A1B2JC94_PICPA-DECOY [2]	?	TRUE		unknown	0	0	1	1	1	0	0	0	0	3	1	0
286.1	TRUE	Empty	tr|A0A1B2JC94|A0A1B2JC94_PICPA-DECOY	tr|A0A1B2JC94|A0A1B2JC94_PICPA-DECOY	?	TRUE		unknown	0	0	0	1	1	0	0	0	0	2	0	0
286.2	TRUE	Empty	tr|C4R268|C4R268_KOMPG-DECOY	tr|C4R268|C4R268_KOMPG-DECOY	?	TRUE		unknown	0	0	1	1	1	0	0	0	0	3	1	0
286.3	TRUE	Empty	tr|F2QRK0|F2QRK0_KOMPC-DECOY	tr|F2QRK0|F2QRK0_KOMPC-DECOY	?	TRUE		unknown	0	0	1	0	0	0	0	0	0	3	1	0
287	TRUE	Empty	Cluster of non-specific serine/threonine protein kinase OS=Komagataella pastoris OX=4922 GN=KIN1 PE=4 SV=1 (A0A1B2J9U0_PICPA)	A0A1B2J9U0_PICPA	123 kDa	TRUE		unknown	0	0	0	1	1	4	0	0	0	1	1	0
287.1	TRUE	Empty	non-specific serine/threonine protein kinase OS=Komagataella pastoris OX=4922 GN=KIN1 PE=4 SV=1	A0A1B2J9U0_PICPA	123 kDa	TRUE		unknown	0	0	0	1	1	4	0	0	0	0	1	0
287.2	TRUE	Empty	non-specific serine/threonine protein kinase OS=Komagataella phaffii (strain GS115 / ATCC 20864) OX=644223 GN=PAS_chr3_0347 PE=4 SV=1	C4R4A2_KOMPG (+1)	124 kDa	TRUE		unknown	0	0	0	1	1	2	0	0	0	1	0	0
288	TRUE	Empty	Cluster of RNA polymerase II transcription factor B subunit 2 OS=Komagataella pastoris OX=4922 GN=TFB2 PE=3 SV=1 (A0A1B2JCV4_PICPA)	A0A1B2JCV4_PICPA	63 kDa	TRUE		unknown	3	0	0	0	3	3	0	0	0	3	0	0
288.1	TRUE	Empty	RNA polymerase II transcription factor B subunit 2 OS=Komagataella pastoris OX=4922 GN=TFB2 PE=3 SV=1	A0A1B2JCV4_PICPA	63 kDa	TRUE		unknown	3	0	0	0	3	3	0	0	0	1	0	0
288.2	TRUE	Empty	RNA polymerase II transcription factor B subunit 2 OS=Komagataella phaffii (strain GS115 / ATCC 20864) OX=644223 GN=PAS_chr4_0238 PE=3 SV=1	C4R792_KOMPG (+1)	63 kDa	TRUE		unknown	2	0	0	0	0	1	0	0	0	2	0	0
289	TRUE	Empty	tr|A0A1B2JEE0|A0A1B2JEE0_PICPA-DECOY	tr|A0A1B2JEE0|A0A1B2JEE0_PICPA-DECOY	?	TRUE		unknown	1	0	1	0	1	1	0	0	0	2	1	0
290	TRUE	Empty	Cluster of tr|C4R286|C4R286_KOMPG-DECOY	tr|C4R286|C4R286_KOMPG-DECOY [3]	?	TRUE		unknown	1	0	1	1	3	1	0	0	1	2	1	0
290.1	TRUE	Empty	tr|C4R286|C4R286_KOMPG-DECOY	tr|C4R286|C4R286_KOMPG-DECOY (+1)	?	TRUE		unknown	1	0	1	1	3	0	0	0	1	1	0	0
290.2	TRUE	Empty	tr|A0A1B2JD12|A0A1B2JD12_PICPA-DECOY	tr|A0A1B2JD12|A0A1B2JD12_PICPA-DECOY	?	TRUE		unknown	0	0	0	0	1	1	0	0	1	2	1	0
291	TRUE	Empty	Cluster of tr|C4QZB6|C4QZB6_KOMPG-DECOY	tr|C4QZB6|C4QZB6_KOMPG-DECOY [2]	?	TRUE		unknown	1	0	2	0	2	2	0	0	0	0	0	0
291.1	TRUE	Empty	tr|C4QZB6|C4QZB6_KOMPG-DECOY	tr|C4QZB6|C4QZB6_KOMPG-DECOY	?	TRUE		unknown	1	0	1	0	2	2	0	0	0	0	0	0
291.2	TRUE	Empty	tr|A0A1G4KPN5|A0A1G4KPN5_KOMPC-DECOY	tr|A0A1G4KPN5|A0A1G4KPN5_KOMPC-DECOY	?	TRUE		unknown	1	0	2	0	1	2	0	0	0	0	0	0
292	TRUE	Empty	Cluster of Histone chaperone RTT106 OS=Komagataella phaffii (strain GS115 / ATCC 20864) OX=644223 GN=PAS_chr3_0526 PE=3 SV=1 (C4R4T9_KOMPG)	C4R4T9_KOMPG	43 kDa	TRUE		unknown	0	0	1	0	3	1	0	0	1	0	0	0
292.1	TRUE	Empty	Histone chaperone RTT106 OS=Komagataella phaffii (strain GS115 / ATCC 20864) OX=644223 GN=PAS_chr3_0526 PE=3 SV=1	C4R4T9_KOMPG (+1)	43 kDa	TRUE		unknown	0	0	0	0	2	1	0	0	0	0	0	0
292.2	TRUE	Empty	Histone chaperone RTT106 OS=Komagataella pastoris OX=4922 GN=RTT106 PE=3 SV=1	A0A1B2J5N7_PICPA	43 kDa	TRUE		unknown	0	0	1	0	3	1	0	0	1	0	0	0
293	TRUE	Empty	tr|C4QZB4|C4QZB4_KOMPG-DECOY	tr|C4QZB4|C4QZB4_KOMPG-DECOY (+1)	?	TRUE		unknown	3	1	1	0	0	4	0	0	2	4	2	0
294	TRUE	Empty	Indole-3-acetaldehyde oxidase OS=Arabidopsis thaliana OX=3702 GN=AAO1 PE=1 SV=2	ALDO1_ARATH	150 kDa			unknown	1	0	1	0	1	0	0	0	1	2	1	0
295	TRUE	Empty	Cluster of Mitochondrial group I intron splicing factor CCM1 OS=Komagataella phaffii (strain ATCC 76273 / CBS 7435 / CECT 11047 / NRRL Y-11430 / Wegner 21-1) OX=981350 GN=PP7435_Chr3-0353 PE=4 SV=1 (F2QV93_KOMPC)	F2QV93_KOMPC [2]	87 kDa	TRUE		unknown	0	0	2	0	1	3	0	0	2	0	1	0
295.1	TRUE	Empty	Mitochondrial group I intron splicing factor CCM1 OS=Komagataella phaffii (strain ATCC 76273 / CBS 7435 / CECT 11047 / NRRL Y-11430 / Wegner 21-1) OX=981350 GN=PP7435_Chr3-0353 PE=4 SV=1	F2QV93_KOMPC	87 kDa	TRUE		unknown	0	0	1	0	0	3	0	0	2	0	1	0
295.2	TRUE	Empty	BA75_03694T0 OS=Komagataella pastoris OX=4922 GN=CCM1 PE=4 SV=1	A0A1B2JGM9_PICPA	85 kDa	TRUE		unknown	0	0	2	0	1	2	0	0	1	0	1	0
296	TRUE	Empty	Cluster of BA75_02432T0 OS=Komagataella pastoris OX=4922 GN=ATY40_BA7502432 PE=3 SV=1 (A0A1B2JCL6_PICPA)	A0A1B2JCL6_PICPA [3]	91 kDa	TRUE		unknown	0	0	1	1	6	2	0	0	0	1	0	0
296.1	TRUE	Empty	BA75_02432T0 OS=Komagataella pastoris OX=4922 GN=ATY40_BA7502432 PE=3 SV=1	A0A1B2JCL6_PICPA	91 kDa	TRUE		unknown	0	0	1	1	4	2	0	0	0	0	0	0
296.2	TRUE	Empty	Eisosome protein 1 OS=Komagataella phaffii (strain GS115 / ATCC 20864) OX=644223 GN=PAS_chr2-1_0722 PE=3 SV=1	C4R1J7_KOMPG (+1)	91 kDa	TRUE		unknown	0	0	1	1	4	2	0	0	0	1	0	0
297	TRUE	Empty	Cluster of tr|A0A1B2J658|A0A1B2J658_PICPA-DECOY	tr|A0A1B2J658|A0A1B2J658_PICPA-DECOY [2]	?	TRUE		unknown	2	0	0	0	2	0	0	0	0	0	1	0
297.1	TRUE	Empty	tr|A0A1B2J658|A0A1B2J658_PICPA-DECOY	tr|A0A1B2J658|A0A1B2J658_PICPA-DECOY	?	TRUE		unknown	1	0	0	0	1	0	0	0	0	0	1	0
297.2	TRUE	Empty	tr|C4R420|C4R420_KOMPG-DECOY	tr|C4R420|C4R420_KOMPG-DECOY (+1)	?	TRUE		unknown	2	0	0	0	2	0	0	0	0	0	0	0
298	TRUE	Empty	tr|A0A1B2J9M5|A0A1B2J9M5_PICPA-DECOY	tr|A0A1B2J9M5|A0A1B2J9M5_PICPA-DECOY	?	TRUE		unknown	0	0	6	1	0	0	0	1	0	4	3	0
299	TRUE	Empty	Cluster of tr|C4R3U4|C4R3U4_KOMPG-DECOY	tr|C4R3U4|C4R3U4_KOMPG-DECOY [3]	?	TRUE		unknown	0	0	1	0	4	3	0	0	0	2	2	0
299.1	TRUE	Empty	tr|C4R3U4|C4R3U4_KOMPG-DECOY	tr|C4R3U4|C4R3U4_KOMPG-DECOY (+1)	?	TRUE		unknown	0	0	0	0	3	3	0	0	0	2	1	0
299.2	TRUE	Empty	tr|A0A1B2J6Y5|A0A1B2J6Y5_PICPA-DECOY	tr|A0A1B2J6Y5|A0A1B2J6Y5_PICPA-DECOY	?	TRUE		unknown	0	0	1	0	3	1	0	0	0	1	1	0
300	TRUE	Empty	Cluster of BA75_05077T0 OS=Komagataella pastoris OX=4922 GN=RPM2 PE=4 SV=1 (A0A1B2JHV9_PICPA)	A0A1B2JHV9_PICPA	80 kDa	TRUE		unknown	0	0	0	0	2	3	0	0	1	4	0	0
300.1	TRUE	Empty	BA75_05077T0 OS=Komagataella pastoris OX=4922 GN=RPM2 PE=4 SV=1	A0A1B2JHV9_PICPA	80 kDa	TRUE		unknown	0	0	0	0	2	3	0	0	1	4	0	0
300.2	TRUE	Empty	Protein subunit of mitochondrial RNase P, has roles in nuclear transcription, cytoplasmic and mitoch OS=Komagataella phaffii (strain GS115 / ATCC 20864) OX=644223 GN=PAS_chr2-1_0185 PE=4 SV=1	C4QZW9_KOMPG (+1)	80 kDa	TRUE		unknown	0	0	0	0	1	2	0	0	0	2	0	0
301	TRUE	Empty	Condensin complex subunit OS=Komagataella phaffii (strain ATCC 76273 / CBS 7435 / CECT 11047 / NRRL Y-11430 / Wegner 21-1) OX=981350 GN=SMC2 PE=3 SV=1	F2R080_KOMPC	133 kDa	TRUE		unknown	0	0	3	4	3	0	0	1	1	5	3	0
302	TRUE	Empty	Uncharacterized protein OS=Komagataella phaffii (strain GS115 / ATCC 20864) OX=644223 GN=PAS_chr4_0770 PE=4 SV=1	C4R8V8_KOMPG (+1)	147 kDa	TRUE		unknown	0	0	0	0	3	3	0	0	0	0	0	0
303	TRUE	Empty	tr|C4R368|C4R368_KOMPG-DECOY	tr|C4R368|C4R368_KOMPG-DECOY (+1)	?	TRUE		unknown	1	0	0	1	1	1	0	0	1	3	0	0
304	TRUE	Empty	Cluster of tr|A0A1B2JA42|A0A1B2JA42_PICPA-DECOY	tr|A0A1B2JA42|A0A1B2JA42_PICPA-DECOY	?	TRUE		unknown	1	0	0	1	1	0	0	0	2	1	0	0
304.1	TRUE	Empty	tr|A0A1B2JA42|A0A1B2JA42_PICPA-DECOY	tr|A0A1B2JA42|A0A1B2JA42_PICPA-DECOY	?	TRUE		unknown	1	0	0	1	1	0	0	0	1	1	0	0
304.2	TRUE	Empty	tr|C4R7K8|C4R7K8_KOMPG-DECOY	tr|C4R7K8|C4R7K8_KOMPG-DECOY	?	TRUE		unknown	1	0	0	0	0	0	0	0	2	1	0	0
305	TRUE	Empty	Cluster of ATP-dependent RNA helicase OS=Komagataella phaffii (strain ATCC 76273 / CBS 7435 / CECT 11047 / NRRL Y-11430 / Wegner 21-1) OX=981350 GN=MSS116 PE=3 SV=1 (A0A1G4KQX6_KOMPC)	A0A1G4KQX6_KOMPC	76 kDa	TRUE		unknown	1	0	2	0	0	1	0	0	1	1	0	0
305.1	TRUE	Empty	ATP-dependent RNA helicase OS=Komagataella phaffii (strain ATCC 76273 / CBS 7435 / CECT 11047 / NRRL Y-11430 / Wegner 21-1) OX=981350 GN=MSS116 PE=3 SV=1	A0A1G4KQX6_KOMPC (+1)	76 kDa	TRUE		unknown	0	0	1	0	0	0	0	0	1	1	0	0
305.2	TRUE	Empty	ATP-dependent RNA helicase OS=Komagataella pastoris OX=4922 GN=MSS116 PE=3 SV=1	A0A1B2JC23_PICPA	76 kDa	TRUE		unknown	1	0	2	0	0	1	0	0	1	1	0	0
306	TRUE	Empty	Cluster of tr|A0A1G4KQS3|A0A1G4KQS3_KOMPC-DECOY	tr|A0A1G4KQS3|A0A1G4KQS3_KOMPC-DECOY	?	TRUE		unknown	0	0	0	0	1	0	0	0	0	2	0	0
306.1	TRUE	Empty	tr|A0A1G4KQS3|A0A1G4KQS3_KOMPC-DECOY	tr|A0A1G4KQS3|A0A1G4KQS3_KOMPC-DECOY (+1)	?	TRUE		unknown	0	0	0	0	1	0	0	0	0	2	0	0
306.2	TRUE	Empty	tr|A0A1B2JIT3|A0A1B2JIT3_PICPA-DECOY	tr|A0A1B2JIT3|A0A1B2JIT3_PICPA-DECOY	?	TRUE		unknown	0	0	0	0	1	0	0	0	0	2	0	0
307	TRUE	Empty	tr|C4R6W0|C4R6W0_KOMPG-DECOY	tr|C4R6W0|C4R6W0_KOMPG-DECOY	?	TRUE		unknown	2	0	1	1	3	4	0	0	0	3	0	0
308	TRUE	Empty	tr|C4R8V8|C4R8V8_KOMPG-DECOY	tr|C4R8V8|C4R8V8_KOMPG-DECOY (+1)	?	TRUE		unknown	0	0	0	1	1	0	0	0	0	3	0	0
309	TRUE	Empty	Cluster of U2-snRNP associated splicing factor OS=Komagataella phaffii (strain GS115 / ATCC 20864) OX=644223 GN=PAS_chr2-1_0418 PE=3 SV=1 (C4R0L6_KOMPG)	C4R0L6_KOMPG [2]	117 kDa	TRUE		unknown	2	0	1	0	0	2	0	0	1	5	0	0
309.1	TRUE	Empty	U2-snRNP associated splicing factor OS=Komagataella phaffii (strain GS115 / ATCC 20864) OX=644223 GN=PAS_chr2-1_0418 PE=3 SV=1	C4R0L6_KOMPG (+1)	117 kDa	TRUE		unknown	2	0	1	0	0	2	0	0	1	5	0	0
309.2	TRUE	Empty	BA75_02762T0 OS=Komagataella pastoris OX=4922 GN=HSH155 PE=3 SV=1	A0A1B2JBR9_PICPA	117 kDa	TRUE		unknown	2	0	1	0	0	2	0	0	0	5	0	0
310	TRUE	Empty	Cluster of BA75_04002T0 OS=Komagataella pastoris OX=4922 GN=ATY40_BA7504002 PE=4 SV=1 (A0A1B2JEQ6_PICPA)	A0A1B2JEQ6_PICPA [2]	81 kDa	TRUE		unknown	0	0	2	0	1	1	0	0	2	2	2	0
310.1	TRUE	Empty	BA75_04002T0 OS=Komagataella pastoris OX=4922 GN=ATY40_BA7504002 PE=4 SV=1	A0A1B2JEQ6_PICPA	81 kDa	TRUE		unknown	0	0	2	0	0	1	0	0	0	1	2	0
310.2	TRUE	Empty	COP9 signalosome complex subunit 2 OS=Komagataella phaffii (strain GS115 / ATCC 20864) OX=644223 GN=PAS_chr1-4_0454 PE=4 SV=1	C4QYI2_KOMPG	72 kDa	TRUE		unknown	0	0	0	0	1	0	0	0	2	1	0	0
310.3	TRUE	Empty	PCI domain-containing protein OS=Komagataella phaffii (strain ATCC 76273 / CBS 7435 / CECT 11047 / NRRL Y-11430 / Wegner 21-1) OX=981350 GN=PP7435_Chr1-1249 PE=4 SV=1	F2QPP5_KOMPC	81 kDa	TRUE		unknown	0	0	0	0	0	1	0	0	0	0	0	0
311	TRUE	Empty	Cluster of Autophagy-related protein 2 OS=Komagataella pastoris OX=4922 GN=ATG2 PE=3 SV=1 (ATG2_PICPA)	ATG2_PICPA	209 kDa	TRUE		unknown	1	0	4	0	4	2	0	0	1	1	1	0
311.1	TRUE	Empty	Autophagy-related protein 2 OS=Komagataella pastoris OX=4922 GN=ATG2 PE=3 SV=1	ATG2_PICPA	209 kDa	TRUE		unknown	1	0	4	0	4	2	0	0	1	0	1	0
311.2	TRUE	Empty	Autophagy-related protein 2 OS=Komagataella phaffii (strain GS115 / ATCC 20864) OX=644223 GN=PAS_chr1-3_0168 PE=3 SV=1	C4QVF7_KOMPG (+1)	208 kDa	TRUE		unknown	1	0	4	0	2	1	0	0	1	1	1	0
312	TRUE	Empty	Cluster of DNA replication checkpoint mediator MRC1 domain-containing protein OS=Komagataella phaffii (strain GS115 / ATCC 20864) OX=644223 GN=PAS_chr1-1_0329 PE=4 SV=1 (C4QWT2_KOMPG)	C4QWT2_KOMPG [2]	121 kDa	TRUE		unknown	2	0	1	0	1	0	0	0	0	2	0	0
312.1	TRUE	Empty	DNA replication checkpoint mediator MRC1 domain-containing protein OS=Komagataella phaffii (strain GS115 / ATCC 20864) OX=644223 GN=PAS_chr1-1_0329 PE=4 SV=1	C4QWT2_KOMPG (+1)	121 kDa	TRUE		unknown	2	0	1	0	0	0	0	0	0	2	0	0
312.2	TRUE	Empty	BA75_01206T0 OS=Komagataella pastoris OX=4922 GN=MRC1 PE=4 SV=1	A0A1B2J8B1_PICPA	122 kDa	TRUE		unknown	0	0	1	0	1	0	0	0	0	0	0	0
313	TRUE	Empty	Cluster of tr|A0A1B2JIG8|A0A1B2JIG8_PICPA-DECOY	tr|A0A1B2JIG8|A0A1B2JIG8_PICPA-DECOY [3]	?	TRUE		unknown	2	0	2	0	8	1	1	0	1	1	0	0
313.1	TRUE	Empty	tr|A0A1B2JIG8|A0A1B2JIG8_PICPA-DECOY	tr|A0A1B2JIG8|A0A1B2JIG8_PICPA-DECOY	?	TRUE		unknown	2	0	0	0	5	1	1	0	1	1	0	0
313.2	TRUE	Empty	tr|C4QZT6|C4QZT6_KOMPG-DECOY	tr|C4QZT6|C4QZT6_KOMPG-DECOY (+1)	?	TRUE		unknown	1	0	2	0	7	1	0	0	1	1	0	0
314	TRUE	Empty	Cluster of tr|A0A1B2JH65|A0A1B2JH65_PICPA-DECOY	tr|A0A1B2JH65|A0A1B2JH65_PICPA-DECOY	?	TRUE		unknown	2	0	0	0	2	4	0	1	1	2	1	0
314.1	TRUE	Empty	tr|A0A1B2JH65|A0A1B2JH65_PICPA-DECOY	tr|A0A1B2JH65|A0A1B2JH65_PICPA-DECOY	?	TRUE		unknown	2	0	0	0	2	4	0	1	0	2	1	0
314.2	TRUE	Empty	tr|A0A1G4KPK9|A0A1G4KPK9_KOMPC-DECOY	tr|A0A1G4KPK9|A0A1G4KPK9_KOMPC-DECOY (+1)	?	TRUE		unknown	2	0	0	0	1	2	0	0	1	2	0	0
315	TRUE	Empty	Cluster of BA75_01714T0 OS=Komagataella pastoris OX=4922 GN=BOI2 PE=4 SV=1 (A0A1B2J9G0_PICPA)	A0A1B2J9G0_PICPA	104 kDa	TRUE		unknown	0	0	0	1	4	1	0	0	0	0	0	0
315.1	TRUE	Empty	BA75_01714T0 OS=Komagataella pastoris OX=4922 GN=BOI2 PE=4 SV=1	A0A1B2J9G0_PICPA	104 kDa	TRUE		unknown	0	0	0	1	4	1	0	0	0	0	0	0
315.2	TRUE	Empty	Protein implicated in polar growth OS=Komagataella phaffii (strain ATCC 76273 / CBS 7435 / CECT 11047 / NRRL Y-11430 / Wegner 21-1) OX=981350 GN=BOI2 PE=4 SV=1	F2QM28_KOMPC	102 kDa	TRUE		unknown	0	0	0	1	1	1	0	0	0	0	0	0
315.3	TRUE	Empty	Protein implicated in polar growth, functionally redundant with Boi1p OS=Komagataella phaffii (strain GS115 / ATCC 20864) OX=644223 GN=PAS_chr1-3_0147 PE=4 SV=1	C4QVD4_KOMPG	104 kDa	TRUE		unknown	0	0	0	1	1	1	0	0	0	0	0	0
316	TRUE	Empty	Cluster of tr|A0A1B2J613|A0A1B2J613_PICPA-DECOY	tr|A0A1B2J613|A0A1B2J613_PICPA-DECOY [2]	?	TRUE		unknown	1	0	0	0	1	0	0	0	2	2	0	0
316.1	TRUE	Empty	tr|A0A1B2J613|A0A1B2J613_PICPA-DECOY	tr|A0A1B2J613|A0A1B2J613_PICPA-DECOY	?	TRUE		unknown	1	0	0	0	1	0	0	0	1	2	0	0
316.2	TRUE	Empty	tr|C4QY42|C4QY42_KOMPG-DECOY	tr|C4QY42|C4QY42_KOMPG-DECOY (+1)	?	TRUE		unknown	1	0	0	0	1	0	0	0	2	2	0	0
317	TRUE	Empty	Cluster of tr|A0A1B2J7H5|A0A1B2J7H5_PICPA-DECOY	tr|A0A1B2J7H5|A0A1B2J7H5_PICPA-DECOY	?	TRUE		unknown	2	0	0	1	0	4	0	0	0	4	0	0
317.1	TRUE	Empty	tr|A0A1B2J7H5|A0A1B2J7H5_PICPA-DECOY	tr|A0A1B2J7H5|A0A1B2J7H5_PICPA-DECOY	?	TRUE		unknown	2	0	0	1	0	4	0	0	0	4	0	0
317.2	TRUE	Empty	tr|C4R3Z9|C4R3Z9_KOMPG-DECOY	tr|C4R3Z9|C4R3Z9_KOMPG-DECOY (+1)	?	TRUE		unknown	0	0	0	1	0	1	0	0	0	0	0	0
318	TRUE	Empty	BA75_01400T0 OS=Komagataella pastoris OX=4922 GN=ATY40_BA7501400 PE=4 SV=1	A0A1B2J848_PICPA	162 kDa	TRUE		unknown	0	0	2	0	1	3	0	0	1	0	1	0
319	TRUE	Empty	tr|A0A1B2J9V7|A0A1B2J9V7_PICPA-DECOY	tr|A0A1B2J9V7|A0A1B2J9V7_PICPA-DECOY	?	TRUE		unknown	0	0	0	0	2	1	0	0	0	3	1	0
320	TRUE	Empty	tr|A0A1B2JA82|A0A1B2JA82_PICPA-DECOY	tr|A0A1B2JA82|A0A1B2JA82_PICPA-DECOY	?	TRUE		unknown	0	0	0	0	2	2	0	0	2	4	2	0
321	TRUE	Empty	BA75_04111T0 OS=Komagataella pastoris OX=4922 GN=ATY40_BA7504111 PE=3 SV=1	A0A1B2JF60_PICPA	57 kDa	TRUE		unknown	3	0	0	0	1	13	0	0	0	2	0	0
322	TRUE	Empty	Cluster of tr|C4R0J8|C4R0J8_KOMPG-DECOY	tr|C4R0J8|C4R0J8_KOMPG-DECOY [3]	?	TRUE		unknown	0	0	2	1	2	2	0	0	2	3	1	0
322.1	TRUE	Empty	tr|C4R0J8|C4R0J8_KOMPG-DECOY	tr|C4R0J8|C4R0J8_KOMPG-DECOY (+1)	?	TRUE		unknown	0	0	2	1	2	1	0	0	1	2	1	0
322.2	TRUE	Empty	tr|A0A1B2JBJ9|A0A1B2JBJ9_PICPA-DECOY	tr|A0A1B2JBJ9|A0A1B2JBJ9_PICPA-DECOY	?	TRUE		unknown	0	0	1	0	1	1	0	0	2	2	1	0
322.3	TRUE	Empty	tr|A2Q6I4|A2Q6I4_PICPA-DECOY	tr|A2Q6I4|A2Q6I4_PICPA-DECOY	?	TRUE		unknown	0	0	0	0	0	0	0	0	0	2	1	0
323	TRUE	Empty	Cluster of Protein that localizes to chromatin and has a role in regulation of histone gene expression OS=Komagataella phaffii (strain GS115 / ATCC 20864) OX=644223 GN=PAS_chr2-1_0401 PE=4 SV=1 (C4R0J8_KOMPG)	C4R0J8_KOMPG	146 kDa	TRUE		unknown	0	0	1	0	2	0	0	0	0	2	1	0
323.1	TRUE	Empty	Protein that localizes to chromatin and has a role in regulation of histone gene expression OS=Komagataella phaffii (strain GS115 / ATCC 20864) OX=644223 GN=PAS_chr2-1_0401 PE=4 SV=1	C4R0J8_KOMPG (+1)	146 kDa	TRUE		unknown	0	0	1	0	0	0	0	0	0	1	1	0
323.2	TRUE	Empty	BA75_02780T0 OS=Komagataella pastoris OX=4922 GN=YTA7 PE=4 SV=1	A0A1B2JBJ9_PICPA	146 kDa	TRUE		unknown	0	0	0	0	2	0	0	0	0	1	0	0
323.3	TRUE	Empty	Putative transcription factor (Fragment) OS=Komagataella pastoris OX=4922 PE=4 SV=1	A2Q6I4_PICPA	119 kDa	TRUE		unknown	0	0	0	0	0	0	0	0	0	0	0	0
324	TRUE	Empty	Cluster of tr|C4QXW1|C4QXW1_KOMPG-DECOY	tr|C4QXW1|C4QXW1_KOMPG-DECOY [2]	?	TRUE		unknown	0	0	1	3	3	3	0	0	0	0	1	0
324.1	TRUE	Empty	tr|C4QXW1|C4QXW1_KOMPG-DECOY	tr|C4QXW1|C4QXW1_KOMPG-DECOY	?	TRUE		unknown	0	0	1	3	1	3	0	0	0	0	1	0
324.2	TRUE	Empty	tr|A0A1B2J685|A0A1B2J685_PICPA-DECOY	tr|A0A1B2J685|A0A1B2J685_PICPA-DECOY	?	TRUE		unknown	0	0	1	2	3	2	0	0	0	0	1	0
324.3	TRUE	Empty	tr|A0A1B2J634|A0A1B2J634_PICPA-DECOY	tr|A0A1B2J634|A0A1B2J634_PICPA-DECOY	?	TRUE		unknown	0	0	1	0	3	2	0	0	0	0	0	0
325	TRUE	Empty	Cluster of tr|A0A1B2J900|A0A1B2J900_PICPA-DECOY	tr|A0A1B2J900|A0A1B2J900_PICPA-DECOY	?	TRUE		unknown	0	0	0	0	2	4	0	0	2	3	0	0
325.1	TRUE	Empty	tr|A0A1B2J900|A0A1B2J900_PICPA-DECOY	tr|A0A1B2J900|A0A1B2J900_PICPA-DECOY	?	TRUE		unknown	0	0	0	0	2	4	0	0	2	3	0	0
325.2	TRUE	Empty	tr|C4QV25|C4QV25_KOMPG-DECOY	tr|C4QV25|C4QV25_KOMPG-DECOY (+1)	?	TRUE		unknown	0	0	0	0	0	0	0	0	0	0	0	0
326	TRUE	Empty	Cluster of tr|A0A1B2JGM8|A0A1B2JGM8_PICPA-DECOY	tr|A0A1B2JGM8|A0A1B2JGM8_PICPA-DECOY [2]	?	TRUE		unknown	2	0	0	0	0	1	0	1	1	2	1	0
326.1	TRUE	Empty	tr|A0A1B2JGM8|A0A1B2JGM8_PICPA-DECOY	tr|A0A1B2JGM8|A0A1B2JGM8_PICPA-DECOY	?	TRUE		unknown	0	0	0	0	0	1	0	1	1	2	1	0
326.2	TRUE	Empty	tr|F2QV56|F2QV56_KOMPC-DECOY	tr|F2QV56|F2QV56_KOMPC-DECOY	?	TRUE		unknown	2	0	0	0	0	1	0	1	1	1	1	0
327	TRUE	Empty	Cluster of DNA replication licensing factor MCM4 OS=Komagataella pastoris OX=4922 GN=MCM4 PE=3 SV=1 (A0A1B2J995_PICPA)	A0A1B2J995_PICPA	94 kDa	TRUE		unknown	0	0	0	0	2	2	0	0	0	1	0	0
327.1	TRUE	Empty	DNA replication licensing factor MCM4 OS=Komagataella pastoris OX=4922 GN=MCM4 PE=3 SV=1	A0A1B2J995_PICPA	94 kDa	TRUE		unknown	0	0	0	0	2	2	0	0	0	1	0	0
327.2	TRUE	Empty	DNA replication licensing factor MCM4 OS=Komagataella phaffii (strain GS115 / ATCC 20864) OX=644223 GN=PAS_chr1-4_0142 PE=3 SV=1	C4QXJ7_KOMPG (+1)	94 kDa	TRUE		unknown	0	0	0	0	1	2	0	0	0	1	0	0
328	TRUE	Empty	Cluster of tr|C4R001|C4R001_KOMPG-DECOY	tr|C4R001|C4R001_KOMPG-DECOY [3]	?	TRUE		unknown	0	0	2	0	3	3	0	0	0	1	0	0
328.1	TRUE	Empty	tr|C4R001|C4R001_KOMPG-DECOY	tr|C4R001|C4R001_KOMPG-DECOY (+1)	?	TRUE		unknown	0	0	1	0	3	2	0	0	0	0	0	0
328.2	TRUE	Empty	tr|A0A1B2JJ23|A0A1B2JJ23_PICPA-DECOY	tr|A0A1B2JJ23|A0A1B2JJ23_PICPA-DECOY	?	TRUE		unknown	0	0	1	0	2	2	0	0	0	1	0	0
329	TRUE	Empty	Cluster of Protein CSF1 OS=Komagataella phaffii (strain GS115 / ATCC 20864) OX=644223 GN=PAS_FragB_0002 PE=4 SV=1 (C4QZ59_KOMPG)	C4QZ59_KOMPG	341 kDa	TRUE		unknown	2	0	0	0	3	1	0	0	0	2	1	0
329.1	TRUE	Empty	Protein CSF1 OS=Komagataella phaffii (strain GS115 / ATCC 20864) OX=644223 GN=PAS_FragB_0002 PE=4 SV=1	C4QZ59_KOMPG	341 kDa	TRUE		unknown	2	0	0	0	3	1	0	0	0	2	1	0
329.2	TRUE	Empty	Protein required for fermentation at low temperature OS=Komagataella phaffii (strain ATCC 76273 / CBS 7435 / CECT 11047 / NRRL Y-11430 / Wegner 21-1) OX=981350 GN=CSF1 PE=4 SV=2	F2QQB6_KOMPC	347 kDa	TRUE		unknown	2	0	0	0	3	1	0	0	0	2	1	0
330	TRUE	Empty	Cluster of tr|F2QUQ4|F2QUQ4_KOMPC-DECOY	tr|F2QUQ4|F2QUQ4_KOMPC-DECOY	?	TRUE		unknown	1	0	0	1	3	1	0	0	0	1	1	0
330.1	TRUE	Empty	tr|F2QUQ4|F2QUQ4_KOMPC-DECOY	tr|F2QUQ4|F2QUQ4_KOMPC-DECOY	?	TRUE		unknown	1	0	0	1	2	1	0	0	0	1	1	0
330.2	TRUE	Empty	tr|A0A1B2JFU0|A0A1B2JFU0_PICPA-DECOY	tr|A0A1B2JFU0|A0A1B2JFU0_PICPA-DECOY	?	TRUE		unknown	1	0	0	1	3	0	0	0	0	1	1	0
331	TRUE	Empty	Cluster of tr|A0A1B2JDM4|A0A1B2JDM4_PICPA-DECOY	tr|A0A1B2JDM4|A0A1B2JDM4_PICPA-DECOY	?	TRUE		unknown	0	0	0	0	1	0	0	0	1	2	0	0
331.1	TRUE	Empty	tr|A0A1B2JDM4|A0A1B2JDM4_PICPA-DECOY	tr|A0A1B2JDM4|A0A1B2JDM4_PICPA-DECOY	?	TRUE		unknown	0	0	0	0	1	0	0	0	0	2	0	0
331.2	TRUE	Empty	tr|C4R303|C4R303_KOMPG-DECOY	tr|C4R303|C4R303_KOMPG-DECOY (+1)	?	TRUE		unknown	0	0	0	0	1	0	0	0	1	1	0	0
332	TRUE	Empty	Cluster of chitin synthase OS=Komagataella pastoris OX=4922 GN=CHS3 PE=4 SV=1 (A0A1B2JJ50_PICPA)	A0A1B2JJ50_PICPA	134 kDa	TRUE		unknown	2	0	0	0	3	0	0	0	0	1	0	0
332.1	TRUE	Empty	chitin synthase OS=Komagataella pastoris OX=4922 GN=CHS3 PE=4 SV=1	A0A1B2JJ50_PICPA	134 kDa	TRUE		unknown	1	0	0	0	3	0	0	0	0	1	0	0
332.2	TRUE	Empty	chitin synthase OS=Komagataella phaffii (strain GS115 / ATCC 20864) OX=644223 GN=PAS_chr2-1_0065 PE=4 SV=1	C4QZJ2_KOMPG (+1)	134 kDa	TRUE		unknown	1	0	0	0	1	0	0	0	0	1	0	0
333	TRUE	Empty	tr|A0A1B2JCE6|A0A1B2JCE6_PICPA-DECOY	tr|A0A1B2JCE6|A0A1B2JCE6_PICPA-DECOY	?	TRUE		unknown	2	0	2	4	5	1	0	2	2	3	2	0
334	TRUE	Empty	Cluster of Phospholipid-transporting ATPase OS=Komagataella phaffii (strain GS115 / ATCC 20864) OX=644223 GN=PAS_chr2-1_0807 PE=3 SV=1 (C4QZH6_KOMPG)	C4QZH6_KOMPG [3]	183 kDa	TRUE		unknown	0	0	3	1	2	3	0	0	0	1	0	0
334.1	TRUE	Empty	Phospholipid-transporting ATPase OS=Komagataella phaffii (strain GS115 / ATCC 20864) OX=644223 GN=PAS_chr2-1_0807 PE=3 SV=1	C4QZH6_KOMPG (+1)	183 kDa	TRUE		unknown	0	0	2	1	0	1	0	0	0	1	0	0
334.2	TRUE	Empty	Phospholipid-transporting ATPase OS=Komagataella pastoris OX=4922 GN=DNF3 PE=3 SV=1	A0A1B2JJ21_PICPA	184 kDa	TRUE		unknown	0	0	2	1	2	2	0	0	0	1	0	0
335	TRUE	Empty	Cluster of Phosphatidylinositol 3-kinase VPS34 OS=Komagataella pastoris OX=4922 GN=VPS34 PE=3 SV=1 (A0A1B2JIW6_PICPA)	A0A1B2JIW6_PICPA [3]	112 kDa	TRUE		unknown	3	0	1	0	2	1	0	0	1	5	1	0
335.1	TRUE	Empty	Phosphatidylinositol 3-kinase VPS34 OS=Komagataella pastoris OX=4922 GN=VPS34 PE=3 SV=1	A0A1B2JIW6_PICPA	112 kDa	TRUE		unknown	2	0	1	0	2	1	0	0	1	4	1	0
335.2	TRUE	Empty	Phosphatidylinositol 3-kinase VPS34 OS=Komagataella phaffii (strain GS115 / ATCC 20864) OX=644223 GN=PAS_chr4_0478 PE=3 SV=1	C4R810_KOMPG (+2)	112 kDa	TRUE		unknown	3	0	1	0	2	1	0	0	1	5	1	0
336	TRUE	Empty	Cluster of tr|A0A1B2JAI1|A0A1B2JAI1_PICPA-DECOY	tr|A0A1B2JAI1|A0A1B2JAI1_PICPA-DECOY [3]	?	TRUE		unknown	1	0	3	0	4	1	0	0	0	0	2	0
336.1	TRUE	Empty	tr|A0A1B2JAI1|A0A1B2JAI1_PICPA-DECOY	tr|A0A1B2JAI1|A0A1B2JAI1_PICPA-DECOY	?	TRUE		unknown	0	0	3	0	2	1	0	0	0	0	2	0
336.2	TRUE	Empty	tr|C4R2K6|C4R2K6_KOMPG-DECOY	tr|C4R2K6|C4R2K6_KOMPG-DECOY (+1)	?	TRUE		unknown	1	0	1	0	2	1	0	0	0	0	0	0
337	TRUE	Empty	Cluster of Exocyst complex component SEC5 OS=Komagataella pastoris OX=4922 GN=SEC5 PE=3 SV=1 (A0A1B2JFM8_PICPA)	A0A1B2JFM8_PICPA [3]	105 kDa	TRUE		unknown	1	0	0	0	1	1	0	0	0	3	0	0
337.1	TRUE	Empty	Exocyst complex component SEC5 OS=Komagataella pastoris OX=4922 GN=SEC5 PE=3 SV=1	A0A1B2JFM8_PICPA	105 kDa	TRUE		unknown	0	0	0	0	1	1	0	0	0	2	0	0
337.2	TRUE	Empty	Exocyst complex component SEC5 OS=Komagataella phaffii (strain GS115 / ATCC 20864) OX=644223 GN=PAS_chr3_1229 PE=3 SV=1	C4R5S5_KOMPG (+1)	105 kDa	TRUE		unknown	1	0	0	0	1	0	0	0	0	2	0	0
338	TRUE	Empty	Cluster of tr|A0A1B2J6H8|A0A1B2J6H8_PICPA-DECOY	tr|A0A1B2J6H8|A0A1B2J6H8_PICPA-DECOY	?	TRUE		unknown	1	0	0	3	1	1	0	0	0	1	1	0
338.1	TRUE	Empty	tr|A0A1B2J6H8|A0A1B2J6H8_PICPA-DECOY	tr|A0A1B2J6H8|A0A1B2J6H8_PICPA-DECOY	?	TRUE		unknown	1	0	0	3	1	1	0	0	0	1	1	0
338.2	TRUE	Empty	tr|C4QY30|C4QY30_KOMPG-DECOY	tr|C4QY30|C4QY30_KOMPG-DECOY (+1)	?	TRUE		unknown	1	0	0	0	1	0	0	0	0	1	0	0
339	TRUE	Empty	Cluster of tr|A0A1B2JCW2|A0A1B2JCW2_PICPA-DECOY	tr|A0A1B2JCW2|A0A1B2JCW2_PICPA-DECOY [2]	?	TRUE		unknown	0	0	0	0	3	1	0	0	0	2	1	0
339.1	TRUE	Empty	tr|A0A1B2JCW2|A0A1B2JCW2_PICPA-DECOY	tr|A0A1B2JCW2|A0A1B2JCW2_PICPA-DECOY	?	TRUE		unknown	0	0	0	0	1	1	0	0	0	2	1	0
339.2	TRUE	Empty	tr|C4R2Q9|C4R2Q9_KOMPG-DECOY	tr|C4R2Q9|C4R2Q9_KOMPG-DECOY (+1)	?	TRUE		unknown	0	0	0	0	3	1	0	0	0	2	1	0
340	TRUE	Empty	Cluster of tr|C4QW32|C4QW32_KOMPG-DECOY	tr|C4QW32|C4QW32_KOMPG-DECOY	?	TRUE		unknown	1	0	0	0	4	8	0	0	5	1	1	0
340.1	TRUE	Empty	tr|C4QW32|C4QW32_KOMPG-DECOY	tr|C4QW32|C4QW32_KOMPG-DECOY	?	TRUE		unknown	1	0	0	0	4	7	0	0	5	1	1	0
340.2	TRUE	Empty	tr|A0A1G4KP60|A0A1G4KP60_KOMPC-DECOY	tr|A0A1G4KP60|A0A1G4KP60_KOMPC-DECOY	?	TRUE		unknown	0	0	0	0	1	1	0	0	0	0	0	0
341	TRUE	Empty	non-specific serine/threonine protein kinase OS=Komagataella pastoris OX=4922 GN=TEL1 PE=3 SV=1	A0A1B2J9M5_PICPA	332 kDa	TRUE		unknown	0	0	0	0	1	0	0	0	0	6	0	0
342	TRUE	Empty	tr|C4QYT2|C4QYT2_KOMPG-DECOY	tr|C4QYT2|C4QYT2_KOMPG-DECOY (+1)	?	TRUE		unknown	4	0	0	1	2	2	0	1	1	3	0	0
343	TRUE	Empty	Cluster of BA75_01564T0 OS=Komagataella pastoris OX=4922 GN=ATY40_BA7501564 PE=3 SV=1 (A0A1B2J5V6_PICPA)	A0A1B2J5V6_PICPA [2]	130 kDa	TRUE		unknown	1	0	0	2	4	1	0	0	1	1	0	0
343.1	TRUE	Empty	BA75_01564T0 OS=Komagataella pastoris OX=4922 GN=ATY40_BA7501564 PE=3 SV=1	A0A1B2J5V6_PICPA	130 kDa	TRUE		unknown	0	0	0	2	2	1	0	0	0	1	0	0
343.2	TRUE	Empty	Oxysterol-binding protein family member OS=Komagataella phaffii (strain ATCC 76273 / CBS 7435 / CECT 11047 / NRRL Y-11430 / Wegner 21-1) OX=981350 GN=OSH2 PE=3 SV=1	F2QNL6_KOMPC	130 kDa	TRUE		unknown	1	0	0	2	3	0	0	0	1	0	0	0
344	TRUE	Empty	Cluster of tr|A0A1B2JBA5|A0A1B2JBA5_PICPA-DECOY	tr|A0A1B2JBA5|A0A1B2JBA5_PICPA-DECOY	?	TRUE		unknown	3	0	0	1	1	1	0	0	1	0	0	0
344.1	TRUE	Empty	tr|A0A1B2JBA5|A0A1B2JBA5_PICPA-DECOY	tr|A0A1B2JBA5|A0A1B2JBA5_PICPA-DECOY	?	TRUE		unknown	3	0	0	1	1	1	0	0	1	0	0	0
344.2	TRUE	Empty	tr|C4R6S9|C4R6S9_KOMPG-DECOY	tr|C4R6S9|C4R6S9_KOMPG-DECOY (+1)	?	TRUE		unknown	3	0	0	1	1	1	0	0	1	0	0	0
345	TRUE	Empty	Cluster of BA75_00619T0 OS=Komagataella pastoris OX=4922 GN=YPR097W PE=4 SV=1 (A0A1B2J623_PICPA)	A0A1B2J623_PICPA	123 kDa	TRUE		unknown	0	0	0	0	3	6	0	0	2	3	1	0
345.1	TRUE	Empty	BA75_00619T0 OS=Komagataella pastoris OX=4922 GN=YPR097W PE=4 SV=1	A0A1B2J623_PICPA	123 kDa	TRUE		unknown	0	0	0	0	3	6	0	0	2	3	1	0
345.2	TRUE	Empty	Protein that contains a Phox homology (PX) domain and binds phosphoinositides OS=Komagataella phaffii (strain GS115 / ATCC 20864) OX=644223 GN=PAS_chr3_0583 PE=4 SV=1	C4R4Z4_KOMPG (+1)	120 kDa	TRUE		unknown	0	0	0	0	2	5	0	0	2	2	1	0
346	TRUE	Empty	Cluster of tr|C4R581|C4R581_KOMPG-DECOY	tr|C4R581|C4R581_KOMPG-DECOY [3]	?	TRUE		unknown	0	0	1	0	2	2	0	0	0	2	0	0
346.1	TRUE	Empty	tr|C4R581|C4R581_KOMPG-DECOY	tr|C4R581|C4R581_KOMPG-DECOY (+1)	?	TRUE		unknown	0	0	1	0	2	1	0	0	0	2	0	0
346.2	TRUE	Empty	tr|A0A1B2JFW8|A0A1B2JFW8_PICPA-DECOY	tr|A0A1B2JFW8|A0A1B2JFW8_PICPA-DECOY	?	TRUE		unknown	0	0	1	0	1	2	0	0	0	1	0	0
347	TRUE	Empty	Cluster of Karyopherin OS=Komagataella phaffii (strain ATCC 76273 / CBS 7435 / CECT 11047 / NRRL Y-11430 / Wegner 21-1) OX=981350 GN=MSN5 PE=4 SV=1 (F2QYK8_KOMPC)	F2QYK8_KOMPC [2]	144 kDa	TRUE		unknown	0	0	0	0	3	2	0	0	0	1	0	0
347.1	TRUE	Empty	Karyopherin OS=Komagataella phaffii (strain ATCC 76273 / CBS 7435 / CECT 11047 / NRRL Y-11430 / Wegner 21-1) OX=981350 GN=MSN5 PE=4 SV=1	F2QYK8_KOMPC	144 kDa	TRUE		unknown	0	0	0	0	3	2	0	0	0	1	0	0
347.2	TRUE	Empty	BA75_04670T0 OS=Komagataella pastoris OX=4922 GN=ATY40_BA7504670 PE=4 SV=1	A0A1B2JJG3_PICPA	144 kDa	TRUE		unknown	0	0	0	0	3	2	0	0	0	1	0	0
348	TRUE	Empty	Cluster of BA75_00966T0 OS=Komagataella pastoris OX=4922 GN=CDC25 PE=4 SV=1 (A0A1B2J8P8_PICPA)	A0A1B2J8P8_PICPA	149 kDa	TRUE		unknown	1	0	0	0	2	0	0	0	1	1	1	0
348.1	TRUE	Empty	BA75_00966T0 OS=Komagataella pastoris OX=4922 GN=CDC25 PE=4 SV=1	A0A1B2J8P8_PICPA	149 kDa	TRUE		unknown	1	0	0	0	2	0	0	0	1	1	1	0
348.2	TRUE	Empty	Membrane bound guanine nucleotide exchange factor (GEF or GDP-release factor) OS=Komagataella phaffii (strain GS115 / ATCC 20864) OX=644223 GN=PAS_chr1-4_0107 PE=4 SV=1	C4QXG3_KOMPG (+1)	149 kDa	TRUE		unknown	1	0	0	0	1	0	0	0	1	0	1	0
349	TRUE	Empty	Cluster of Uncharacterized protein OS=Komagataella phaffii (strain GS115 / ATCC 20864) OX=644223 GN=PAS_chr3_0309 PE=4 SV=1 (C4R463_KOMPG)	C4R463_KOMPG [3]	78 kDa	TRUE		unknown	0	0	2	1	4	1	0	0	0	1	0	0
349.1	TRUE	Empty	Uncharacterized protein OS=Komagataella phaffii (strain GS115 / ATCC 20864) OX=644223 GN=PAS_chr3_0309 PE=4 SV=1	C4R463_KOMPG (+1)	78 kDa	TRUE		unknown	0	0	1	1	4	1	0	0	0	1	0	0
349.2	TRUE	Empty	BA75_00329T0 OS=Komagataella pastoris OX=4922 GN=IRC3 PE=4 SV=1	A0A1B2J7P3_PICPA	77 kDa	TRUE		unknown	0	0	2	0	3	1	0	0	0	0	0	0
350	TRUE	Empty	Cluster of tr|A0A1B2J757|A0A1B2J757_PICPA-DECOY	tr|A0A1B2J757|A0A1B2J757_PICPA-DECOY [2]	?	TRUE		unknown	0	0	1	2	2	2	0	0	2	3	1	0
350.1	TRUE	Empty	tr|A0A1B2J757|A0A1B2J757_PICPA-DECOY	tr|A0A1B2J757|A0A1B2J757_PICPA-DECOY	?	TRUE		unknown	0	0	1	1	1	1	0	0	2	2	1	0
350.2	TRUE	Empty	tr|C4R477|C4R477_KOMPG-DECOY	tr|C4R477|C4R477_KOMPG-DECOY (+1)	?	TRUE		unknown	0	0	1	1	2	2	0	0	2	3	1	0
351	TRUE	Empty	Cluster of tr|C4QX47|C4QX47_KOMPG-DECOY	tr|C4QX47|C4QX47_KOMPG-DECOY	?	TRUE		unknown	0	0	5	0	1	3	0	0	2	0	0	0
351.1	TRUE	Empty	tr|C4QX47|C4QX47_KOMPG-DECOY	tr|C4QX47|C4QX47_KOMPG-DECOY	?	TRUE		unknown	0	0	5	0	1	3	0	0	2	0	0	0
351.2	TRUE	Empty	tr|F2QMU7|F2QMU7_KOMPC-DECOY	tr|F2QMU7|F2QMU7_KOMPC-DECOY	?	TRUE		unknown	0	0	5	0	1	3	0	0	1	0	0	0
352	TRUE	Empty	Cluster of Urea amidolyase, contains both urea carboxylase and allophanate hydrolase activities OS=Komagataella phaffii (strain GS115 / ATCC 20864) OX=644223 GN=PAS_chr4_0173 PE=4 SV=1 (C4R723_KOMPG)	C4R723_KOMPG	201 kDa	TRUE		unknown	0	0	1	0	2	0	0	0	2	1	1	0
352.1	TRUE	Empty	Urea amidolyase, contains both urea carboxylase and allophanate hydrolase activities OS=Komagataella phaffii (strain GS115 / ATCC 20864) OX=644223 GN=PAS_chr4_0173 PE=4 SV=1	C4R723_KOMPG (+1)	201 kDa	TRUE		unknown	0	0	1	0	2	0	0	0	1	1	0	0
352.2	TRUE	Empty	BA75_03140T0 OS=Komagataella pastoris OX=4922 GN=DUR1,2 PE=4 SV=1	A0A1B2JAE0_PICPA	201 kDa	TRUE		unknown	0	0	1	0	2	0	0	0	2	1	1	0
353	TRUE	Empty	Cluster of tr|C4R2L2|C4R2L2_KOMPG-DECOY	tr|C4R2L2|C4R2L2_KOMPG-DECOY	?	TRUE		unknown	0	0	0	1	0	4	0	0	0	0	0	0
353.1	TRUE	Empty	tr|C4R2L2|C4R2L2_KOMPG-DECOY	tr|C4R2L2|C4R2L2_KOMPG-DECOY	?	TRUE		unknown	0	0	0	1	0	4	0	0	0	0	0	0
353.2	TRUE	Empty	tr|F2QR62|F2QR62_KOMPC-DECOY	tr|F2QR62|F2QR62_KOMPC-DECOY	?	TRUE		unknown	0	0	0	1	0	0	0	0	0	0	0	0
354	TRUE	Empty	Cluster of Endoribonuclease YSH1 OS=Komagataella phaffii (strain GS115 / ATCC 20864) OX=644223 GN=PAS_chr1-1_0015 PE=3 SV=1 (C4QVU5_KOMPG)	C4QVU5_KOMPG	89 kDa	TRUE		unknown	2	0	0	0	2	1	0	0	0	2	0	0
354.1	TRUE	Empty	Endoribonuclease YSH1 OS=Komagataella phaffii (strain GS115 / ATCC 20864) OX=644223 GN=PAS_chr1-1_0015 PE=3 SV=1	C4QVU5_KOMPG	89 kDa	TRUE		unknown	1	0	0	0	1	1	0	0	0	1	0	0
354.2	TRUE	Empty	Endoribonuclease YSH1 OS=Komagataella pastoris OX=4922 GN=YSH1 PE=3 SV=1	A0A1B2J6K3_PICPA	88 kDa	TRUE		unknown	2	0	0	0	2	1	0	0	0	2	0	0
355	TRUE	Empty	Cluster of BA75_03950T0 OS=Komagataella pastoris OX=4922 GN=CBF1 PE=4 SV=1 (A0A1B2JGB1_PICPA)	A0A1B2JGB1_PICPA [2]	30 kDa	TRUE		unknown	0	0	0	0	0	2	1	0	0	1	0	0
355.1	TRUE	Empty	BA75_03950T0 OS=Komagataella pastoris OX=4922 GN=CBF1 PE=4 SV=1	A0A1B2JGB1_PICPA	30 kDa	TRUE		unknown	0	0	0	0	0	1	0	0	0	1	0	0
355.2	TRUE	Empty	Helix-loop-helix protein that binds the motif CACRTG OS=Komagataella phaffii (strain GS115 / ATCC 20864) OX=644223 GN=PAS_chr1-4_0407 PE=4 SV=1	C4QYD2_KOMPG (+1)	30 kDa	TRUE		unknown	0	0	0	0	0	2	1	0	0	1	0	0
356	TRUE	Empty	BA75_03731T0 OS=Komagataella pastoris OX=4922 GN=YPR117W PE=4 SV=1	A0A1B2JGL2_PICPA	280 kDa	TRUE		unknown	0	0	3	0	2	2	0	1	1	3	1	0
357	TRUE	Empty	tr|C4QW80|C4QW80_KOMPG-DECOY	tr|C4QW80|C4QW80_KOMPG-DECOY (+1)	?	TRUE		unknown	3	0	1	0	2	1	0	0	4	0	0	0
358	TRUE	Empty	tr|A0A1B2JIH5|A0A1B2JIH5_PICPA-DECOY	tr|A0A1B2JIH5|A0A1B2JIH5_PICPA-DECOY	?	TRUE		unknown	1	0	0	0	3	1	0	0	0	1	0	0
359	TRUE	Empty	Cluster of tr|C4QW97|C4QW97_KOMPG-DECOY	tr|C4QW97|C4QW97_KOMPG-DECOY [3]	?	TRUE		unknown	5	0	1	0	1	3	0	1	1	3	3	0
359.1	TRUE	Empty	tr|C4QW97|C4QW97_KOMPG-DECOY	tr|C4QW97|C4QW97_KOMPG-DECOY (+1)	?	TRUE		unknown	4	0	1	0	1	3	0	1	0	3	3	0
359.2	TRUE	Empty	tr|A0A1B2J5U6|A0A1B2J5U6_PICPA-DECOY	tr|A0A1B2J5U6|A0A1B2J5U6_PICPA-DECOY	?	TRUE		unknown	5	0	0	0	0	3	0	1	1	2	3	0
360	TRUE	Empty	Cluster of phosphoribosylformylglycinamidine synthase OS=Komagataella pastoris OX=4922 GN=ADE6 PE=3 SV=1 (A0A1B2JEW7_PICPA)	A0A1B2JEW7_PICPA	147 kDa	TRUE		unknown	0	0	0	1	0	3	0	0	0	3	1	0
360.1	TRUE	Empty	phosphoribosylformylglycinamidine synthase OS=Komagataella pastoris OX=4922 GN=ADE6 PE=3 SV=1	A0A1B2JEW7_PICPA	147 kDa	TRUE		unknown	0	0	0	1	0	3	0	0	0	2	1	0
360.2	TRUE	Empty	phosphoribosylformylglycinamidine synthase OS=Komagataella phaffii (strain GS115 / ATCC 20864) OX=644223 GN=PAS_chr1-4_0551 PE=3 SV=1	C4QYT3_KOMPG (+1)	147 kDa	TRUE		unknown	0	0	0	1	0	1	0	0	0	1	1	0
361	TRUE	Empty	Cluster of tr|A0A1B2JHX1|A0A1B2JHX1_PICPA-DECOY	tr|A0A1B2JHX1|A0A1B2JHX1_PICPA-DECOY [2]	?	TRUE		unknown	0	0	2	0	2	1	0	0	0	1	1	0
361.1	TRUE	Empty	tr|A0A1B2JHX1|A0A1B2JHX1_PICPA-DECOY	tr|A0A1B2JHX1|A0A1B2JHX1_PICPA-DECOY	?	TRUE		unknown	0	0	2	0	1	1	0	0	0	1	1	0
361.2	TRUE	Empty	tr|C4QZF5|C4QZF5_KOMPG-DECOY	tr|C4QZF5|C4QZF5_KOMPG-DECOY (+1)	?	TRUE		unknown	0	0	0	0	2	0	0	0	0	0	1	0
362	TRUE	Empty	Cluster of tr|A0A1B2JCQ7|A0A1B2JCQ7_PICPA-DECOY	tr|A0A1B2JCQ7|A0A1B2JCQ7_PICPA-DECOY [2]	?	TRUE		unknown	0	0	0	1	2	4	0	0	0	0	2	0
362.1	TRUE	Empty	tr|A0A1B2JCQ7|A0A1B2JCQ7_PICPA-DECOY	tr|A0A1B2JCQ7|A0A1B2JCQ7_PICPA-DECOY	?	TRUE		unknown	0	0	0	1	1	4	0	0	0	0	2	0
362.2	TRUE	Empty	tr|F2QRE2|F2QRE2_KOMPC-DECOY	tr|F2QRE2|F2QRE2_KOMPC-DECOY (+1)	?	TRUE		unknown	0	0	0	1	2	4	0	0	0	0	2	0
363	TRUE	Empty	Cluster of E1 ubiquitin-activating enzyme OS=Komagataella pastoris OX=4922 GN=UBA1 PE=3 SV=1 (A0A1B2JG57_PICPA)	A0A1B2JG57_PICPA [2]	114 kDa	TRUE		unknown	0	0	1	0	1	0	0	0	1	2	2	0
363.1	TRUE	Empty	E1 ubiquitin-activating enzyme OS=Komagataella pastoris OX=4922 GN=UBA1 PE=3 SV=1	A0A1B2JG57_PICPA	114 kDa	TRUE		unknown	0	0	1	0	1	0	0	0	1	1	1	0
363.2	TRUE	Empty	E1 ubiquitin-activating enzyme OS=Komagataella phaffii (strain GS115 / ATCC 20864) OX=644223 GN=PAS_chr3_0856 PE=3 SV=1	C4R5S2_KOMPG (+1)	115 kDa	TRUE		unknown	0	0	0	0	1	0	0	0	1	1	2	0
364	TRUE	Empty	Cluster of Isw1b complex ATPase subunit OS=Komagataella phaffii (strain ATCC 76273 / CBS 7435 / CECT 11047 / NRRL Y-11430 / Wegner 21-1) OX=981350 GN=ISW1 PE=4 SV=1 (A0A1G4KPT3_KOMPC)	A0A1G4KPT3_KOMPC [3]	124 kDa	TRUE		unknown	0	0	0	2	3	2	0	0	0	1	1	0
364.1	TRUE	Empty	Isw1b complex ATPase subunit OS=Komagataella phaffii (strain ATCC 76273 / CBS 7435 / CECT 11047 / NRRL Y-11430 / Wegner 21-1) OX=981350 GN=ISW1 PE=4 SV=1	A0A1G4KPT3_KOMPC (+1)	124 kDa	TRUE		unknown	0	0	0	2	2	2	0	0	0	1	1	0
364.2	TRUE	Empty	BA75_02279T0 OS=Komagataella pastoris OX=4922 GN=ISW1 PE=4 SV=1	A0A1B2JAW5_PICPA	123 kDa	TRUE		unknown	0	0	0	0	2	1	0	0	0	0	1	0
365	TRUE	Empty	Cluster of tr|A0A1B2JIP3|A0A1B2JIP3_PICPA-DECOY	tr|A0A1B2JIP3|A0A1B2JIP3_PICPA-DECOY	?	TRUE		unknown	2	0	0	0	1	5	0	0	2	2	1	0
365.1	TRUE	Empty	tr|A0A1B2JIP3|A0A1B2JIP3_PICPA-DECOY	tr|A0A1B2JIP3|A0A1B2JIP3_PICPA-DECOY	?	TRUE		unknown	2	0	0	0	1	5	0	0	2	2	1	0
365.2	TRUE	Empty	sp|C4R7S9|GET3_KOMPG-DECOY	sp|C4R7S9|GET3_KOMPG-DECOY (+1)	?	TRUE		unknown	2	0	0	0	1	5	0	0	2	2	0	0
366	TRUE	Empty	tr|C4QV21|C4QV21_KOMPG-DECOY	tr|C4QV21|C4QV21_KOMPG-DECOY (+1)	?	TRUE		unknown	1	0	0	1	3	1	0	0	1	1	0	0
367	TRUE	Empty	Cluster of tr|A0A1B2J657|A0A1B2J657_PICPA-DECOY	tr|A0A1B2J657|A0A1B2J657_PICPA-DECOY	?	TRUE		unknown	0	0	1	2	3	2	0	0	1	1	0	0
367.1	TRUE	Empty	tr|A0A1B2J657|A0A1B2J657_PICPA-DECOY	tr|A0A1B2J657|A0A1B2J657_PICPA-DECOY	?	TRUE		unknown	0	0	1	1	3	2	0	0	0	1	0	0
367.2	TRUE	Empty	tr|C4QWR8|C4QWR8_KOMPG-DECOY	tr|C4QWR8|C4QWR8_KOMPG-DECOY (+1)	?	TRUE		unknown	0	0	1	1	1	1	0	0	1	1	0	0
368	TRUE	Empty	Cluster of BA75_03146T0 OS=Komagataella pastoris OX=4922 GN=LRG1 PE=4 SV=1 (A0A1B2JDG8_PICPA)	A0A1B2JDG8_PICPA	129 kDa	TRUE		unknown	1	0	0	1	4	0	0	0	0	2	0	0
368.1	TRUE	Empty	BA75_03146T0 OS=Komagataella pastoris OX=4922 GN=LRG1 PE=4 SV=1	A0A1B2JDG8_PICPA	129 kDa	TRUE		unknown	1	0	0	1	4	0	0	0	0	2	0	0
368.2	TRUE	Empty	Rho GTPase-activating protein OS=Komagataella phaffii (strain ATCC 76273 / CBS 7435 / CECT 11047 / NRRL Y-11430 / Wegner 21-1) OX=981350 GN=LRG1 PE=4 SV=1	F2R022_KOMPC	129 kDa	TRUE		unknown	0	0	0	0	3	0	0	0	0	0	0	0
369	TRUE	Empty	Cluster of Uncharacterized protein OS=Komagataella phaffii (strain GS115 / ATCC 20864) OX=644223 GN=PAS_FragB_0058 PE=4 SV=1 (C4QZB6_KOMPG)	C4QZB6_KOMPG [2]	217 kDa	TRUE		unknown	1	0	2	0	3	3	0	0	3	1	1	0
369.1	TRUE	Empty	Uncharacterized protein OS=Komagataella phaffii (strain GS115 / ATCC 20864) OX=644223 GN=PAS_FragB_0058 PE=4 SV=1	C4QZB6_KOMPG	217 kDa	TRUE		unknown	1	0	2	0	2	3	0	0	3	1	1	0
369.2	TRUE	Empty	Formin, involved in the formation of linear actin filaments OS=Komagataella phaffii (strain ATCC 76273 / CBS 7435 / CECT 11047 / NRRL Y-11430 / Wegner 21-1) OX=981350 GN=BNR1 PE=4 SV=1	A0A1G4KPN5_KOMPC	175 kDa	TRUE		unknown	1	0	1	0	3	3	0	0	3	1	1	0
370	TRUE	Empty	Cluster of tr|A0A1B2JC49|A0A1B2JC49_PICPA-DECOY	tr|A0A1B2JC49|A0A1B2JC49_PICPA-DECOY [3]	?	TRUE		unknown	0	0	1	0	2	2	0	0	3	2	0	0
370.1	TRUE	Empty	tr|A0A1B2JC49|A0A1B2JC49_PICPA-DECOY	tr|A0A1B2JC49|A0A1B2JC49_PICPA-DECOY	?	TRUE		unknown	0	0	1	0	2	1	0	0	3	2	0	0
370.2	TRUE	Empty	tr|A0A1G4KPN2|A0A1G4KPN2_KOMPC-DECOY	tr|A0A1G4KPN2|A0A1G4KPN2_KOMPC-DECOY (+1)	?	TRUE		unknown	0	0	0	0	1	2	0	0	3	2	0	0
371	TRUE	Empty	Cluster of BA75_04853T0 OS=Komagataella pastoris OX=4922 GN=SFB3 PE=4 SV=1 (A0A1B2JIV2_PICPA)	A0A1B2JIV2_PICPA	111 kDa	TRUE		unknown	0	0	1	0	1	2	0	0	1	2	0	0
371.1	TRUE	Empty	BA75_04853T0 OS=Komagataella pastoris OX=4922 GN=SFB3 PE=4 SV=1	A0A1B2JIV2_PICPA	111 kDa	TRUE		unknown	0	0	1	0	0	1	0	0	1	2	0	0
371.2	TRUE	Empty	Member of the Sec24p family OS=Komagataella phaffii (strain GS115 / ATCC 20864) OX=644223 GN=PAS_chr4_0484 PE=4 SV=1	C4R816_KOMPG	99 kDa	TRUE		unknown	0	0	0	0	1	2	0	0	0	2	0	0
371.3	TRUE	Empty	COPII coat Sec23p-Sfb3p heterodimer component OS=Komagataella phaffii (strain ATCC 76273 / CBS 7435 / CECT 11047 / NRRL Y-11430 / Wegner 21-1) OX=981350 GN=SFB3 PE=4 SV=1	F2QZ30_KOMPC	102 kDa	TRUE		unknown	0	0	0	0	1	2	0	0	0	0	0	0
371.4	TRUE	Empty	Lst1p OS=Komagataella pastoris OX=4922 GN=LST1 PE=4 SV=1	Q0PVD7_PICPA	102 kDa	TRUE		unknown	0	0	0	0	1	2	0	0	0	2	0	0
372	TRUE	Empty	Cluster of BA75_03651T0 OS=Komagataella pastoris OX=4922 GN=SYP1 PE=4 SV=1 (A0A1B2JGM8_PICPA)	A0A1B2JGM8_PICPA	97 kDa	TRUE		unknown	0	0	1	0	0	1	0	0	2	0	0	0
372.1	TRUE	Empty	BA75_03651T0 OS=Komagataella pastoris OX=4922 GN=SYP1 PE=4 SV=1	A0A1B2JGM8_PICPA	97 kDa	TRUE		unknown	0	0	1	0	0	1	0	0	2	0	0	0
372.2	TRUE	Empty	MHD domain-containing protein OS=Komagataella phaffii (strain ATCC 76273 / CBS 7435 / CECT 11047 / NRRL Y-11430 / Wegner 21-1) OX=981350 GN=PP7435_Chr3-0314 PE=4 SV=1	F2QV56_KOMPC	97 kDa	TRUE		unknown	0	0	1	0	0	0	0	0	1	0	0	0
372.3	TRUE	Empty	Protein with a potential role in actin cytoskeletal organization OS=Komagataella phaffii (strain GS115 / ATCC 20864) OX=644223 GN=PAS_chr3_0865 PE=4 SV=1	C4R5T3_KOMPG	93 kDa	TRUE		unknown	0	0	0	0	0	0	0	0	1	0	0	0
373	TRUE	Empty	Cluster of tr|C4QW44|C4QW44_KOMPG-DECOY	tr|C4QW44|C4QW44_KOMPG-DECOY [3]	?	TRUE		unknown	1	0	1	0	3	1	0	0	0	0	1	0
373.1	TRUE	Empty	tr|C4QW44|C4QW44_KOMPG-DECOY	tr|C4QW44|C4QW44_KOMPG-DECOY (+1)	?	TRUE		unknown	1	0	1	0	2	1	0	0	0	0	1	0
373.2	TRUE	Empty	tr|A0A1B2J818|A0A1B2J818_PICPA-DECOY	tr|A0A1B2J818|A0A1B2J818_PICPA-DECOY	?	TRUE		unknown	0	0	0	0	3	0	0	0	0	0	0	0
374	TRUE	Empty	Cluster of tr|A0A1B2JGA7|A0A1B2JGA7_PICPA-DECOY	tr|A0A1B2JGA7|A0A1B2JGA7_PICPA-DECOY	?	TRUE		unknown	1	0	0	0	2	1	0	0	1	0	1	0
374.1	TRUE	Empty	tr|A0A1B2JGA7|A0A1B2JGA7_PICPA-DECOY	tr|A0A1B2JGA7|A0A1B2JGA7_PICPA-DECOY	?	TRUE		unknown	0	0	0	0	2	1	0	0	1	0	0	0
374.2	TRUE	Empty	tr|C4R557|C4R557_KOMPG-DECOY	tr|C4R557|C4R557_KOMPG-DECOY (+1)	?	TRUE		unknown	1	0	0	0	1	1	0	0	1	0	1	0
375	TRUE	Empty	Cluster of Flavoprotein domain-containing protein OS=Komagataella phaffii (strain GS115 / ATCC 20864) OX=644223 GN=PAS_chr2-1_0871 PE=4 SV=1 (C4R193_KOMPG)	C4R193_KOMPG	59 kDa	TRUE		unknown	1	0	0	0	1	1	0	0	0	0	2	0
375.1	TRUE	Empty	Flavoprotein domain-containing protein OS=Komagataella phaffii (strain GS115 / ATCC 20864) OX=644223 GN=PAS_chr2-1_0871 PE=4 SV=1	C4R193_KOMPG (+1)	59 kDa	TRUE		unknown	1	0	0	0	1	1	0	0	0	0	2	0
375.2	TRUE	Empty	BA75_02534T0 OS=Komagataella pastoris OX=4922 GN=ATY40_BA7502534 PE=4 SV=1	A0A1B2JAB2_PICPA	59 kDa	TRUE		unknown	1	0	0	0	1	1	0	0	0	0	2	0
376	TRUE	Empty	Cluster of Essential component of the Arp2/3 complex OS=Komagataella phaffii (strain GS115 / ATCC 20864) OX=644223 GN=PAS_chr2-1_0556 PE=3 SV=1 (C4R116_KOMPG)	C4R116_KOMPG	48 kDa	TRUE		unknown	0	0	0	0	0	0	0	0	2	3	0	0
376.1	TRUE	Empty	Essential component of the Arp2/3 complex OS=Komagataella phaffii (strain GS115 / ATCC 20864) OX=644223 GN=PAS_chr2-1_0556 PE=3 SV=1	C4R116_KOMPG (+1)	48 kDa	TRUE		unknown	0	0	0	0	0	0	0	0	1	3	0	0
376.2	TRUE	Empty	BA75_02611T0 OS=Komagataella pastoris OX=4922 GN=ARP3 PE=3 SV=1	A0A1B2JDC3_PICPA	48 kDa	TRUE		unknown	0	0	0	0	0	0	0	0	1	3	0	0
377	TRUE	Empty	RNA helicase in the DEAD-box family, involved in RNA isomerization at the 5' splice site OS=Komagataella phaffii (strain GS115 / ATCC 20864) OX=644223 GN=PAS_chr2-2_0187 PE=3 SV=1	C4R2K9_KOMPG (+1)	63 kDa	TRUE		unknown	0	0	2	0	1	3	0	0	0	0	0	0
378	TRUE	Empty	Cluster of BA75_03905T0 OS=Komagataella pastoris OX=4922 GN=ATY40_BA7503905 PE=3 SV=1 (A0A1B2JGA7_PICPA)	A0A1B2JGA7_PICPA [3]	87 kDa	TRUE		unknown	0	0	2	2	2	3	0	0	0	2	1	0
378.1	TRUE	Empty	BA75_03905T0 OS=Komagataella pastoris OX=4922 GN=ATY40_BA7503905 PE=3 SV=1	A0A1B2JGA7_PICPA	87 kDa	TRUE		unknown	0	0	1	0	2	3	0	0	0	1	1	0
378.2	TRUE	Empty	RNA helicase in the DEAD-box family, necessary for prespliceosome formation OS=Komagataella phaffii (strain GS115 / ATCC 20864) OX=644223 GN=PAS_chr3_0644 PE=3 SV=1	C4R557_KOMPG (+1)	88 kDa	TRUE		unknown	0	0	1	2	0	1	0	0	0	2	1	0
379	TRUE	Empty	Cluster of tr|C4R571|C4R571_KOMPG-DECOY	tr|C4R571|C4R571_KOMPG-DECOY	?	TRUE		unknown	0	0	2	0	1	0	0	1	2	5	1	0
379.1	TRUE	Empty	tr|C4R571|C4R571_KOMPG-DECOY	tr|C4R571|C4R571_KOMPG-DECOY	?	TRUE		unknown	0	0	2	0	1	0	0	1	2	5	1	0
379.2	TRUE	Empty	tr|F2QVS1|F2QVS1_KOMPC-DECOY	tr|F2QVS1|F2QVS1_KOMPC-DECOY	?	TRUE		unknown	0	0	0	0	1	0	0	1	2	5	1	0
380	TRUE	Empty	Cluster of tr|A0A1B2JBA8|A0A1B2JBA8_PICPA-DECOY	tr|A0A1B2JBA8|A0A1B2JBA8_PICPA-DECOY	?	TRUE		unknown	2	0	1	2	3	1	0	0	1	2	1	0
380.1	TRUE	Empty	tr|A0A1B2JBA8|A0A1B2JBA8_PICPA-DECOY	tr|A0A1B2JBA8|A0A1B2JBA8_PICPA-DECOY	?	TRUE		unknown	2	0	1	2	3	1	0	0	1	2	1	0
380.2	TRUE	Empty	tr|F2R061|F2R061_KOMPC-DECOY	tr|F2R061|F2R061_KOMPC-DECOY	?	TRUE		unknown	1	0	1	2	3	0	0	0	1	2	1	0
381	TRUE	Empty	Cluster of tr|A0A1B2JEQ6|A0A1B2JEQ6_PICPA-DECOY	tr|A0A1B2JEQ6|A0A1B2JEQ6_PICPA-DECOY	?	TRUE		unknown	0	0	4	2	2	1	0	1	0	1	2	0
381.1	TRUE	Empty	tr|A0A1B2JEQ6|A0A1B2JEQ6_PICPA-DECOY	tr|A0A1B2JEQ6|A0A1B2JEQ6_PICPA-DECOY	?	TRUE		unknown	0	0	3	0	0	1	0	0	0	1	2	0
381.2	TRUE	Empty	tr|F2QPP5|F2QPP5_KOMPC-DECOY	tr|F2QPP5|F2QPP5_KOMPC-DECOY	?	TRUE		unknown	0	0	2	2	2	1	0	1	0	0	0	0
381.3	TRUE	Empty	tr|C4QYI2|C4QYI2_KOMPG-DECOY	tr|C4QYI2|C4QYI2_KOMPG-DECOY	?	TRUE		unknown	0	0	2	2	2	0	0	1	0	0	0	0
382	TRUE	Empty	Cluster of tr|C4QYF9|C4QYF9_KOMPG-DECOY	tr|C4QYF9|C4QYF9_KOMPG-DECOY [3]	?	TRUE		unknown	2	0	0	0	5	0	0	0	1	0	1	0
382.1	TRUE	Empty	tr|C4QYF9|C4QYF9_KOMPG-DECOY	tr|C4QYF9|C4QYF9_KOMPG-DECOY (+1)	?	TRUE		unknown	1	0	0	0	4	0	0	0	1	0	1	0
382.2	TRUE	Empty	tr|A0A1B2JEZ9|A0A1B2JEZ9_PICPA-DECOY	tr|A0A1B2JEZ9|A0A1B2JEZ9_PICPA-DECOY	?	TRUE		unknown	1	0	0	0	2	0	0	0	1	0	0	0
383	TRUE	Empty	Structural maintenance of chromosomes protein 4 OS=Komagataella pastoris OX=4922 GN=SMC4 PE=3 SV=1	A0A1B2JDC0_PICPA	163 kDa	TRUE		unknown	1	0	2	0	5	0	0	0	0	2	2	0
384	TRUE	Empty	Uncharacterized protein OS=Komagataella phaffii (strain GS115 / ATCC 20864) OX=644223 GN=PAS_chr3_1055 PE=4 SV=1	C4R6D1_KOMPG (+1)	292 kDa	TRUE		unknown	5	0	0	0	0	0	0	0	2	5	2	0
385	TRUE	Empty	BA75_01021T0 OS=Komagataella pastoris OX=4922 GN=BRR2 PE=4 SV=1	A0A1B2J5N5_PICPA	245 kDa	TRUE		unknown	0	0	3	0	3	2	0	0	1	1	1	0
386	TRUE	Empty	Cluster of tr|C4R6W3|C4R6W3_KOMPG-DECOY	tr|C4R6W3|C4R6W3_KOMPG-DECOY [2]	?	TRUE		unknown	3	0	2	1	3	1	0	0	1	0	1	0
386.1	TRUE	Empty	tr|C4R6W3|C4R6W3_KOMPG-DECOY	tr|C4R6W3|C4R6W3_KOMPG-DECOY (+1)	?	TRUE		unknown	1	0	2	1	3	1	0	0	1	0	0	0
386.2	TRUE	Empty	tr|A0A1B2JAG6|A0A1B2JAG6_PICPA-DECOY	tr|A0A1B2JAG6|A0A1B2JAG6_PICPA-DECOY	?	TRUE		unknown	2	0	1	0	1	0	0	0	1	0	1	0
387	TRUE	Empty	Cluster of tr|F2QNL6|F2QNL6_KOMPC-DECOY	tr|F2QNL6|F2QNL6_KOMPC-DECOY [2]	?	TRUE		unknown	0	0	0	0	0	4	0	0	0	2	2	0
387.1	TRUE	Empty	tr|F2QNL6|F2QNL6_KOMPC-DECOY	tr|F2QNL6|F2QNL6_KOMPC-DECOY	?	TRUE		unknown	0	0	0	0	0	4	0	0	0	2	1	0
387.2	TRUE	Empty	tr|A0A1B2J5V6|A0A1B2J5V6_PICPA-DECOY	tr|A0A1B2J5V6|A0A1B2J5V6_PICPA-DECOY	?	TRUE		unknown	0	0	0	0	0	3	0	0	0	2	2	0
388	TRUE	Empty	Cluster of tr|C4R888|C4R888_KOMPG-DECOY	tr|C4R888|C4R888_KOMPG-DECOY [2]	?	TRUE		unknown	0	0	3	0	0	0	0	0	0	0	1	0
388.1	TRUE	Empty	tr|C4R888|C4R888_KOMPG-DECOY	tr|C4R888|C4R888_KOMPG-DECOY (+1)	?	TRUE		unknown	0	0	3	0	0	0	0	0	0	0	1	0
388.2	TRUE	Empty	tr|A0A1B2JJE8|A0A1B2JJE8_PICPA-DECOY	tr|A0A1B2JJE8|A0A1B2JJE8_PICPA-DECOY	?	TRUE		unknown	0	0	2	0	0	0	0	0	0	0	0	0
389	TRUE	Empty	Cluster of tr|C4R0S4|C4R0S4_KOMPG-DECOY	tr|C4R0S4|C4R0S4_KOMPG-DECOY	?	TRUE		unknown	0	0	0	0	2	2	0	0	0	1	0	0
389.1	TRUE	Empty	tr|C4R0S4|C4R0S4_KOMPG-DECOY	tr|C4R0S4|C4R0S4_KOMPG-DECOY (+1)	?	TRUE		unknown	0	0	0	0	1	1	0	0	0	0	0	0
389.2	TRUE	Empty	tr|A0A1B2JCJ0|A0A1B2JCJ0_PICPA-DECOY	tr|A0A1B2JCJ0|A0A1B2JCJ0_PICPA-DECOY	?	TRUE		unknown	0	0	0	0	1	1	0	0	0	1	0	0
390	TRUE	Empty	Mediator of RNA polymerase II transcription subunit 12 OS=Komagataella pastoris OX=4922 GN=SRB8 PE=3 SV=1	A0A1B2J7B4_PICPA	177 kDa	TRUE		unknown	2	0	0	0	2	7	0	0	0	3	3	0
391	TRUE	Empty	Cluster of tr|C4R0M3|C4R0M3_KOMPG-DECOY	tr|C4R0M3|C4R0M3_KOMPG-DECOY [3]	?	TRUE		unknown	1	0	2	2	0	0	0	0	2	0	3	0
391.1	TRUE	Empty	tr|C4R0M3|C4R0M3_KOMPG-DECOY	tr|C4R0M3|C4R0M3_KOMPG-DECOY (+1)	?	TRUE		unknown	1	0	2	2	0	0	0	0	2	0	2	0
391.2	TRUE	Empty	tr|A0A1B2JB82|A0A1B2JB82_PICPA-DECOY	tr|A0A1B2JB82|A0A1B2JB82_PICPA-DECOY	?	TRUE		unknown	1	0	2	2	0	0	0	0	1	0	3	0
392	TRUE	Empty	Cluster of tr|A0A1B2JFQ7|A0A1B2JFQ7_PICPA-DECOY	tr|A0A1B2JFQ7|A0A1B2JFQ7_PICPA-DECOY	?	TRUE		unknown	2	0	1	1	4	1	0	0	2	1	0	0
392.1	TRUE	Empty	tr|A0A1B2JFQ7|A0A1B2JFQ7_PICPA-DECOY	tr|A0A1B2JFQ7|A0A1B2JFQ7_PICPA-DECOY	?	TRUE		unknown	1	0	1	1	4	1	0	0	2	1	0	0
392.2	TRUE	Empty	tr|C4R6G7|C4R6G7_KOMPG-DECOY	tr|C4R6G7|C4R6G7_KOMPG-DECOY	?	TRUE		unknown	1	0	1	1	3	1	0	0	2	1	0	0
392.3	TRUE	Empty	tr|F2QUH0|F2QUH0_KOMPC-DECOY	tr|F2QUH0|F2QUH0_KOMPC-DECOY	?	TRUE		unknown	0	0	0	0	0	0	0	0	0	0	0	0
393	TRUE	Empty	Cluster of BA75_02017T0 OS=Komagataella pastoris OX=4922 GN=URA2 PE=3 SV=1 (A0A1B2JCW2_PICPA)	A0A1B2JCW2_PICPA [3]	245 kDa	TRUE		unknown	1	0	1	0	2	1	0	0	0	2	0	0
393.1	TRUE	Empty	BA75_02017T0 OS=Komagataella pastoris OX=4922 GN=URA2 PE=3 SV=1	A0A1B2JCW2_PICPA	245 kDa	TRUE		unknown	0	0	1	0	2	1	0	0	0	1	0	0
393.2	TRUE	Empty	Bifunctional carbamoylphosphate synthetase (CPSase)-aspartate transcarbamylase (ATCase) OS=Komagataella phaffii (strain GS115 / ATCC 20864) OX=644223 GN=PAS_chr2-2_0142 PE=3 SV=1	C4R2Q9_KOMPG (+1)	245 kDa	TRUE		unknown	1	0	1	0	1	1	0	0	0	2	0	0
394	TRUE	Empty	Cluster of 5'-3' exoribonuclease 1 OS=Komagataella phaffii (strain GS115 / ATCC 20864) OX=644223 GN=PAS_chr3_0432 PE=3 SV=1 (C4R4J6_KOMPG)	C4R4J6_KOMPG [2]	165 kDa	TRUE		unknown	0	0	1	1	2	0	0	0	0	1	0	0
394.1	TRUE	Empty	5'-3' exoribonuclease 1 OS=Komagataella phaffii (strain GS115 / ATCC 20864) OX=644223 GN=PAS_chr3_0432 PE=3 SV=1	C4R4J6_KOMPG (+1)	165 kDa	TRUE		unknown	0	0	0	1	2	0	0	0	0	1	0	0
394.2	TRUE	Empty	5'-3' exoribonuclease 1 OS=Komagataella pastoris OX=4922 GN=XRN1 PE=3 SV=1	A0A1B2J6Q6_PICPA	165 kDa	TRUE		unknown	0	0	1	0	0	0	0	0	0	1	0	0
395	TRUE	Empty	Cluster of tr|C4QXY4|C4QXY4_KOMPG-DECOY	tr|C4QXY4|C4QXY4_KOMPG-DECOY [3]	?	TRUE		unknown	2	3	0	0	2	3	1	0	2	1	5	0
395.1	TRUE	Empty	tr|C4QXY4|C4QXY4_KOMPG-DECOY	tr|C4QXY4|C4QXY4_KOMPG-DECOY (+1)	?	TRUE		unknown	2	3	0	0	2	3	1	0	2	1	3	0
395.2	TRUE	Empty	tr|A0A1B2J724|A0A1B2J724_PICPA-DECOY	tr|A0A1B2J724|A0A1B2J724_PICPA-DECOY	?	TRUE		unknown	2	3	0	0	1	2	1	0	2	1	5	0
396	TRUE	Empty	Cluster of tr|C4QVK6|C4QVK6_KOMPG-DECOY	tr|C4QVK6|C4QVK6_KOMPG-DECOY	?	TRUE		unknown	0	0	1	1	0	0	1	0	1	3	1	0
396.1	TRUE	Empty	tr|C4QVK6|C4QVK6_KOMPG-DECOY	tr|C4QVK6|C4QVK6_KOMPG-DECOY (+1)	?	TRUE		unknown	0	0	1	1	0	0	1	0	1	2	1	0
396.2	TRUE	Empty	tr|A0A1B2J660|A0A1B2J660_PICPA-DECOY	tr|A0A1B2J660|A0A1B2J660_PICPA-DECOY	?	TRUE		unknown	0	0	1	1	0	0	1	0	1	3	1	0
397	TRUE	Empty	Cluster of tr|C4R1A9|C4R1A9_KOMPG-DECOY	tr|C4R1A9|C4R1A9_KOMPG-DECOY	?	TRUE		unknown	0	1	0	1	2	2	0	0	0	1	1	0
397.1	TRUE	Empty	tr|C4R1A9|C4R1A9_KOMPG-DECOY	tr|C4R1A9|C4R1A9_KOMPG-DECOY (+1)	?	TRUE		unknown	0	1	0	0	1	2	0	0	0	0	0	0
397.2	TRUE	Empty	tr|A0A1B2JB01|A0A1B2JB01_PICPA-DECOY	tr|A0A1B2JB01|A0A1B2JB01_PICPA-DECOY	?	TRUE		unknown	0	1	0	1	2	2	0	0	0	1	1	0
398	TRUE	Empty	Cluster of tr|A0A1B2J6U9|A0A1B2J6U9_PICPA-DECOY	tr|A0A1B2J6U9|A0A1B2J6U9_PICPA-DECOY	?	TRUE		unknown	0	0	0	1	2	2	0	0	0	0	0	0
398.1	TRUE	Empty	tr|A0A1B2J6U9|A0A1B2J6U9_PICPA-DECOY	tr|A0A1B2J6U9|A0A1B2J6U9_PICPA-DECOY	?	TRUE		unknown	0	0	0	0	2	2	0	0	0	0	0	0
398.2	TRUE	Empty	tr|A0A1G4KQF1|A0A1G4KQF1_KOMPC-DECOY	tr|A0A1G4KQF1|A0A1G4KQF1_KOMPC-DECOY (+1)	?	TRUE		unknown	0	0	0	1	1	0	0	0	0	0	0	0
399	TRUE	Empty	Cluster of Carbon source-responsive zinc-finger transcription factor OS=Komagataella phaffii (strain GS115 / ATCC 20864) OX=644223 GN=PAS_chr4_0487 PE=4 SV=1 (C4R818_KOMPG)	C4R818_KOMPG [3]	133 kDa	TRUE		unknown	1	0	0	0	2	2	0	0	0	0	1	0
399.1	TRUE	Empty	Carbon source-responsive zinc-finger transcription factor OS=Komagataella phaffii (strain GS115 / ATCC 20864) OX=644223 GN=PAS_chr4_0487 PE=4 SV=1	C4R818_KOMPG (+2)	133 kDa	TRUE		unknown	0	0	0	0	2	2	0	0	0	0	0	0
399.2	TRUE	Empty	BA75_04850T0 OS=Komagataella pastoris OX=4922 GN=ADR1 PE=4 SV=1	A0A1B2JJC0_PICPA	132 kDa	TRUE		unknown	1	0	0	0	1	1	0	0	0	0	1	0
400	TRUE	Empty	BTB domain-containing protein OS=Komagataella phaffii (strain ATCC 76273 / CBS 7435 / CECT 11047 / NRRL Y-11430 / Wegner 21-1) OX=981350 GN=PP7435_Chr1-0377 PE=4 SV=1	F2QM87_KOMPC	163 kDa	TRUE		unknown	0	0	1	0	3	1	0	0	1	3	0	0
401	TRUE	Empty	tr|A0A1B2JF06|A0A1B2JF06_PICPA-DECOY	tr|A0A1B2JF06|A0A1B2JF06_PICPA-DECOY	?	TRUE		unknown	4	0	0	0	3	0	0	0	0	5	5	0
402	TRUE	Empty	USP domain-containing protein OS=Komagataella phaffii (strain ATCC 76273 / CBS 7435 / CECT 11047 / NRRL Y-11430 / Wegner 21-1) OX=981350 GN=PP7435_Chr3-0706 PE=4 SV=1	A0A1G4KQE1_KOMPC	100 kDa	TRUE		unknown	1	0	0	1	2	1	0	0	1	2	0	0
403	TRUE	Empty	Cluster of RING finger protein involved in proteolytic control of sumoylated substrates OS=Komagataella phaffii (strain GS115 / ATCC 20864) OX=644223 GN=PAS_chr2-1_0447 PE=3 SV=1 (C4R0Q0_KOMPG)	C4R0Q0_KOMPG [3]	129 kDa	TRUE		unknown	0	0	1	1	4	0	0	0	0	2	0	0
403.1	TRUE	Empty	RING finger protein involved in proteolytic control of sumoylated substrates OS=Komagataella phaffii (strain GS115 / ATCC 20864) OX=644223 GN=PAS_chr2-1_0447 PE=3 SV=1	C4R0Q0_KOMPG (+1)	129 kDa	TRUE		unknown	0	0	1	1	3	0	0	0	0	1	0	0
403.2	TRUE	Empty	BA75_02730T0 OS=Komagataella pastoris OX=4922 GN=ATY40_BA7502730 PE=3 SV=1	A0A1B2JAW6_PICPA	129 kDa	TRUE		unknown	0	0	1	1	3	0	0	0	0	1	0	0
404	TRUE	Empty	Cluster of BA75_01898T0 OS=Komagataella pastoris OX=4922 GN=PTK2 PE=4 SV=1 (A0A1B2JAS1_PICPA)	A0A1B2JAS1_PICPA [2]	95 kDa	TRUE		unknown	0	0	2	1	2	0	0	1	2	2	0	0
404.1	TRUE	Empty	BA75_01898T0 OS=Komagataella pastoris OX=4922 GN=PTK2 PE=4 SV=1	A0A1B2JAS1_PICPA	95 kDa	TRUE		unknown	0	0	1	1	1	0	0	1	0	0	0	0
404.2	TRUE	Empty	Serine/threonine protein kinase OS=Komagataella phaffii (strain GS115 / ATCC 20864) OX=644223 GN=PAS_chr2-2_0038 PE=4 SV=1	C4R324_KOMPG (+1)	95 kDa	TRUE		unknown	0	0	1	0	2	0	0	0	2	2	0	0
405	TRUE	Empty	Cluster of tr|A0A1B2JFC6|A0A1B2JFC6_PICPA-DECOY	tr|A0A1B2JFC6|A0A1B2JFC6_PICPA-DECOY	?	TRUE		unknown	2	0	1	0	2	0	0	1	1	1	0	0
405.1	TRUE	Empty	tr|A0A1B2JFC6|A0A1B2JFC6_PICPA-DECOY	tr|A0A1B2JFC6|A0A1B2JFC6_PICPA-DECOY	?	TRUE		unknown	2	0	1	0	2	0	0	0	1	1	0	0
405.2	TRUE	Empty	tr|C4QZ37|C4QZ37_KOMPG-DECOY	tr|C4QZ37|C4QZ37_KOMPG-DECOY (+1)	?	TRUE		unknown	2	0	0	0	2	0	0	1	0	1	0	0
406	TRUE	Empty	Cluster of BA75_01362T0 OS=Komagataella pastoris OX=4922 GN=BMS1 PE=4 SV=1 (A0A1B2J8N7_PICPA)	A0A1B2J8N7_PICPA	137 kDa	TRUE		unknown	0	0	0	2	1	0	0	0	0	2	0	0
406.1	TRUE	Empty	BA75_01362T0 OS=Komagataella pastoris OX=4922 GN=BMS1 PE=4 SV=1	A0A1B2J8N7_PICPA	137 kDa	TRUE		unknown	0	0	0	2	1	0	0	0	0	1	0	0
406.2	TRUE	Empty	GTPase required for synthesis of 40S ribosomal subunits OS=Komagataella phaffii (strain ATCC 76273 / CBS 7435 / CECT 11047 / NRRL Y-11430 / Wegner 21-1) OX=981350 GN=BMS1 PE=4 SV=1	F2QMJ3_KOMPC (+1)	136 kDa	TRUE		unknown	0	0	0	0	1	0	0	0	0	1	0	0
407	TRUE	Empty	Cluster of tr|A0A1B2JE21|A0A1B2JE21_PICPA-DECOY	tr|A0A1B2JE21|A0A1B2JE21_PICPA-DECOY	?	TRUE		unknown	1	0	1	0	1	0	0	0	0	3	0	0
407.1	TRUE	Empty	tr|A0A1B2JE21|A0A1B2JE21_PICPA-DECOY	tr|A0A1B2JE21|A0A1B2JE21_PICPA-DECOY	?	TRUE		unknown	1	0	1	0	1	0	0	0	0	3	0	0
407.2	TRUE	Empty	tr|C4R0B7|C4R0B7_KOMPG-DECOY	tr|C4R0B7|C4R0B7_KOMPG-DECOY (+1)	?	TRUE		unknown	1	0	0	0	1	0	0	0	0	2	0	0
408	TRUE	Empty	Cluster of tr|C4R4X2|C4R4X2_KOMPG-DECOY	tr|C4R4X2|C4R4X2_KOMPG-DECOY	?	TRUE		unknown	0	0	2	0	1	1	0	0	0	1	0	0
408.1	TRUE	Empty	tr|C4R4X2|C4R4X2_KOMPG-DECOY	tr|C4R4X2|C4R4X2_KOMPG-DECOY	?	TRUE		unknown	0	0	2	0	1	0	0	0	0	1	0	0
408.2	TRUE	Empty	tr|A0A1B2J570|A0A1B2J570_PICPA-DECOY	tr|A0A1B2J570|A0A1B2J570_PICPA-DECOY	?	TRUE		unknown	0	0	0	0	0	1	0	0	0	1	0	0
409	TRUE	Empty	Protein transport protein sec16 OS=Komagataella pastoris OX=4922 GN=SEC16 PE=3 SV=1	A0A1B2JD80_PICPA	281 kDa	TRUE		unknown	0	0	0	0	1	0	0	0	3	2	0	0
410	TRUE	Empty	tr|A0A1B2JFJ5|A0A1B2JFJ5_PICPA-DECOY	tr|A0A1B2JFJ5|A0A1B2JFJ5_PICPA-DECOY	?	TRUE		unknown	0	0	1	0	1	1	0	1	0	4	1	0
411	TRUE	Empty	tr|A0A1B2MJE4|A0A1B2MJE4_9ASCO-DECOY	tr|A0A1B2MJE4|A0A1B2MJE4_9ASCO-DECOY	?			unknown	0	1	2	0	2	0	0	0	0	2	3	0
412	TRUE	Empty	BA75_01471T0 OS=Komagataella pastoris OX=4922 GN=ATY40_BA7501471 PE=4 SV=1	A0A1B2J5M7_PICPA	150 kDa	TRUE		unknown	0	0	2	0	1	0	0	0	2	1	0	0
413	TRUE	Empty	Cluster of tr|A0A1B2JC44|A0A1B2JC44_PICPA-DECOY	tr|A0A1B2JC44|A0A1B2JC44_PICPA-DECOY	?	TRUE		unknown	1	0	1	1	2	1	0	0	0	0	0	0
413.1	TRUE	Empty	tr|A0A1B2JC44|A0A1B2JC44_PICPA-DECOY	tr|A0A1B2JC44|A0A1B2JC44_PICPA-DECOY	?	TRUE		unknown	1	0	1	1	2	0	0	0	0	0	0	0
413.2	TRUE	Empty	tr|F2QTC0|F2QTC0_KOMPC-DECOY	tr|F2QTC0|F2QTC0_KOMPC-DECOY	?	TRUE		unknown	0	0	1	0	0	1	0	0	0	0	0	0
413.3	TRUE	Empty	tr|C4R0C6|C4R0C6_KOMPG-DECOY	tr|C4R0C6|C4R0C6_KOMPG-DECOY	?	TRUE		unknown	0	0	0	0	0	0	0	0	0	0	0	0
414	TRUE	Empty	Cluster of Nuclear actin-related protein involved in chromatin remodeling OS=Komagataella phaffii (strain GS115 / ATCC 20864) OX=644223 GN=PAS_chr2-2_0068 PE=3 SV=1 (C4R2Z0_KOMPG)	C4R2Z0_KOMPG [2]	84 kDa	TRUE		unknown	0	0	1	0	4	1	0	0	2	2	0	0
414.1	TRUE	Empty	Nuclear actin-related protein involved in chromatin remodeling OS=Komagataella phaffii (strain GS115 / ATCC 20864) OX=644223 GN=PAS_chr2-2_0068 PE=3 SV=1	C4R2Z0_KOMPG	84 kDa	TRUE		unknown	0	0	1	0	3	1	0	0	2	2	0	0
414.2	TRUE	Empty	BA75_01937T0 OS=Komagataella pastoris OX=4922 GN=ARP5 PE=3 SV=1	A0A1B2JDA4_PICPA	85 kDa	TRUE		unknown	0	0	1	0	2	0	0	0	2	1	0	0
415	TRUE	Empty	Cluster of tr|A0A1B2JFR3|A0A1B2JFR3_PICPA-DECOY	tr|A0A1B2JFR3|A0A1B2JFR3_PICPA-DECOY	?	TRUE		unknown	0	0	0	0	2	1	0	0	1	1	0	0
415.1	TRUE	Empty	tr|A0A1B2JFR3|A0A1B2JFR3_PICPA-DECOY	tr|A0A1B2JFR3|A0A1B2JFR3_PICPA-DECOY	?	TRUE		unknown	0	0	0	0	2	1	0	0	1	1	0	0
415.2	TRUE	Empty	tr|C4QYS8|C4QYS8_KOMPG-DECOY	tr|C4QYS8|C4QYS8_KOMPG-DECOY (+1)	?	TRUE		unknown	0	0	0	0	2	1	0	0	1	1	0	0
416	TRUE	Empty	Cluster of tr|F2QNF5|F2QNF5_KOMPC-DECOY	tr|F2QNF5|F2QNF5_KOMPC-DECOY	?	TRUE		unknown	0	0	0	0	2	2	0	0	1	1	0	0
416.1	TRUE	Empty	tr|F2QNF5|F2QNF5_KOMPC-DECOY	tr|F2QNF5|F2QNF5_KOMPC-DECOY	?	TRUE		unknown	0	0	0	0	2	2	0	0	1	1	0	0
416.2	TRUE	Empty	tr|C4QVL2|C4QVL2_KOMPG-DECOY	tr|C4QVL2|C4QVL2_KOMPG-DECOY	?	TRUE		unknown	0	0	0	0	2	2	0	0	1	1	0	0
417	TRUE	Empty	Cluster of tr|C4R150|C4R150_KOMPG-DECOY	tr|C4R150|C4R150_KOMPG-DECOY [2]	?	TRUE		unknown	1	0	1	0	3	1	0	0	0	1	0	0
417.1	TRUE	Empty	tr|C4R150|C4R150_KOMPG-DECOY	tr|C4R150|C4R150_KOMPG-DECOY (+1)	?	TRUE		unknown	1	0	1	0	3	1	0	0	0	1	0	0
417.2	TRUE	Empty	tr|A0A1B2JBE6|A0A1B2JBE6_PICPA-DECOY	tr|A0A1B2JBE6|A0A1B2JBE6_PICPA-DECOY	?	TRUE		unknown	1	0	1	0	3	1	0	0	0	1	0	0
418	TRUE	Empty	Cluster of Uncharacterized protein OS=Komagataella phaffii (strain GS115 / ATCC 20864) OX=644223 GN=PAS_chr1-1_0210 PE=4 SV=1 (C4QWF6_KOMPG)	C4QWF6_KOMPG [2]	39 kDa	TRUE		unknown	0	0	0	0	1	0	0	0	0	4	0	0
418.1	TRUE	Empty	Uncharacterized protein OS=Komagataella phaffii (strain GS115 / ATCC 20864) OX=644223 GN=PAS_chr1-1_0210 PE=4 SV=1	C4QWF6_KOMPG (+1)	39 kDa	TRUE		unknown	0	0	0	0	1	0	0	0	0	4	0	0
418.2	TRUE	Empty	BA75_01328T0 OS=Komagataella pastoris OX=4922 GN=ATY40_BA7501328 PE=4 SV=1	A0A1B2J6Q1_PICPA	39 kDa	TRUE		unknown	0	0	0	0	1	0	0	0	0	2	0	0
419	TRUE	Empty	Beta-mannosyltransferase 1 OS=Candida albicans (strain SC5314 / ATCC MYA-2876) OX=237561 GN=BMT1 PE=3 SV=1	BMT1_CANAL	80 kDa	TRUE		unknown	2	0	1	0	2	7	0	0	0	0	1	0
420	TRUE	Empty	Cluster of BA75_03972T0 OS=Komagataella pastoris OX=4922 GN=BFR1 PE=4 SV=1 (A0A1B2JFM0_PICPA)	A0A1B2JFM0_PICPA	51 kDa	TRUE		unknown	1	0	1	1	1	1	0	0	0	3	0	0
420.1	TRUE	Empty	BA75_03972T0 OS=Komagataella pastoris OX=4922 GN=BFR1 PE=4 SV=1	A0A1B2JFM0_PICPA	51 kDa	TRUE		unknown	1	0	1	1	1	1	0	0	0	3	0	0
420.2	TRUE	Empty	Component of mRNP complexes associated with polyribosomes OS=Komagataella phaffii (strain GS115 / ATCC 20864) OX=644223 GN=PAS_chr1-4_0428 PE=4 SV=1	C4QYF5_KOMPG (+1)	58 kDa	TRUE		unknown	1	0	1	1	1	1	0	0	0	3	0	0
421	TRUE	Empty	Cluster of tr|A0A1B2JEW7|A0A1B2JEW7_PICPA-DECOY	tr|A0A1B2JEW7|A0A1B2JEW7_PICPA-DECOY [2]	?	TRUE		unknown	1	0	0	2	0	1	0	0	1	3	1	0
421.1	TRUE	Empty	tr|A0A1B2JEW7|A0A1B2JEW7_PICPA-DECOY	tr|A0A1B2JEW7|A0A1B2JEW7_PICPA-DECOY	?	TRUE		unknown	0	0	0	1	0	1	0	0	1	1	0	0
421.2	TRUE	Empty	tr|C4QYT3|C4QYT3_KOMPG-DECOY	tr|C4QYT3|C4QYT3_KOMPG-DECOY (+1)	?	TRUE		unknown	1	0	0	2	0	0	0	0	1	2	1	0
422	TRUE	Empty	Cluster of Metal resistance protein YCF1 OS=Komagataella phaffii (strain GS115 / ATCC 20864) OX=644223 GN=PAS_chr1-4_0619 PE=4 SV=1 (C4QZ04_KOMPG)	C4QZ04_KOMPG [2]	169 kDa	TRUE		unknown	0	0	0	0	3	1	0	0	0	2	2	0
422.1	TRUE	Empty	Metal resistance protein YCF1 OS=Komagataella phaffii (strain GS115 / ATCC 20864) OX=644223 GN=PAS_chr1-4_0619 PE=4 SV=1	C4QZ04_KOMPG (+1)	169 kDa	TRUE		unknown	0	0	0	0	3	1	0	0	0	2	2	0
422.2	TRUE	Empty	BA75_04186T0 OS=Komagataella pastoris OX=4922 GN=YCF1 PE=4 SV=1	A0A1B2JG71_PICPA	170 kDa	TRUE		unknown	0	0	0	0	3	1	0	0	0	1	1	0
423	TRUE	Empty	Cluster of BA75_02972T0 OS=Komagataella pastoris OX=4922 GN=ATY40_BA7502972 PE=3 SV=1 (A0A1B2JBN5_PICPA)	A0A1B2JBN5_PICPA [3]	93 kDa	TRUE		unknown	4	0	0	0	4	0	0	0	2	0	0	0
423.1	TRUE	Empty	BA75_02972T0 OS=Komagataella pastoris OX=4922 GN=ATY40_BA7502972 PE=3 SV=1	A0A1B2JBN5_PICPA	93 kDa	TRUE		unknown	4	0	0	0	3	0	0	0	2	0	0	0
423.2	TRUE	Empty	Uncharacterized protein OS=Komagataella phaffii (strain ATCC 76273 / CBS 7435 / CECT 11047 / NRRL Y-11430 / Wegner 21-1) OX=981350 GN=PP7435_Chr4-0673 PE=3 SV=1	F2QZK3_KOMPC (+1)	93 kDa	TRUE		unknown	2	0	0	0	3	0	0	0	1	0	0	0
424	TRUE	Empty	Cluster of tr|C4R4R4|C4R4R4_KOMPG-DECOY	tr|C4R4R4|C4R4R4_KOMPG-DECOY [2]	?	TRUE		unknown	0	0	0	0	2	1	0	0	0	1	0	0
424.1	TRUE	Empty	tr|C4R4R4|C4R4R4_KOMPG-DECOY	tr|C4R4R4|C4R4R4_KOMPG-DECOY (+1)	?	TRUE		unknown	0	0	0	0	2	1	0	0	0	1	0	0
424.2	TRUE	Empty	tr|A0A1B2J996|A0A1B2J996_PICPA-DECOY	tr|A0A1B2J996|A0A1B2J996_PICPA-DECOY	?	TRUE		unknown	0	0	0	0	1	1	0	0	0	1	0	0
425	TRUE	Empty	Cluster of tr|C4R8F3|C4R8F3_KOMPG-DECOY	tr|C4R8F3|C4R8F3_KOMPG-DECOY [3]	?	TRUE		unknown	1	0	1	0	5	1	0	0	0	2	2	0
425.1	TRUE	Empty	tr|C4R8F3|C4R8F3_KOMPG-DECOY	tr|C4R8F3|C4R8F3_KOMPG-DECOY (+1)	?	TRUE		unknown	1	0	1	0	4	1	0	0	0	2	2	0
425.2	TRUE	Empty	tr|A0A1B2JHH9|A0A1B2JHH9_PICPA-DECOY	tr|A0A1B2JHH9|A0A1B2JHH9_PICPA-DECOY	?	TRUE		unknown	0	0	1	0	3	0	0	0	0	1	1	0
426	TRUE	Empty	Cluster of tr|C4R5N8|C4R5N8_KOMPG-DECOY	tr|C4R5N8|C4R5N8_KOMPG-DECOY	?	TRUE		unknown	0	0	1	0	1	0	0	0	1	3	1	0
426.1	TRUE	Empty	tr|C4R5N8|C4R5N8_KOMPG-DECOY	tr|C4R5N8|C4R5N8_KOMPG-DECOY (+1)	?	TRUE		unknown	0	0	1	0	0	0	0	0	1	2	1	0
426.2	TRUE	Empty	tr|A0A1B2JF03|A0A1B2JF03_PICPA-DECOY	tr|A0A1B2JF03|A0A1B2JF03_PICPA-DECOY	?	TRUE		unknown	0	0	1	0	1	0	0	0	1	3	1	0
427	TRUE	Empty	Cluster of tr|C4QVY6|C4QVY6_KOMPG-DECOY	tr|C4QVY6|C4QVY6_KOMPG-DECOY [3]	?	TRUE		unknown	2	0	0	0	5	0	0	0	0	1	2	0
427.1	TRUE	Empty	tr|C4QVY6|C4QVY6_KOMPG-DECOY	tr|C4QVY6|C4QVY6_KOMPG-DECOY (+1)	?	TRUE		unknown	0	0	0	0	4	0	0	0	0	1	2	0
427.2	TRUE	Empty	tr|A0A1B2J8Y9|A0A1B2J8Y9_PICPA-DECOY	tr|A0A1B2J8Y9|A0A1B2J8Y9_PICPA-DECOY	?	TRUE		unknown	2	0	0	0	4	0	0	0	0	1	1	0
428	TRUE	Empty	Cluster of Ubiquitin carboxyl-terminal hydrolase OS=Komagataella phaffii (strain GS115 / ATCC 20864) OX=644223 GN=PAS_chr1-1_0040 PE=3 SV=1 (C4QVX5_KOMPG)	C4QVX5_KOMPG [3]	109 kDa	TRUE		unknown	1	0	1	0	3	3	0	0	0	0	0	0
428.1	TRUE	Empty	Ubiquitin carboxyl-terminal hydrolase OS=Komagataella phaffii (strain GS115 / ATCC 20864) OX=644223 GN=PAS_chr1-1_0040 PE=3 SV=1	C4QVX5_KOMPG (+1)	109 kDa	TRUE		unknown	0	0	0	0	2	2	0	0	0	0	0	0
428.2	TRUE	Empty	Ubiquitin carboxyl-terminal hydrolase OS=Komagataella pastoris OX=4922 GN=ATY40_BA7501512 PE=3 SV=1	A0A1B2J6F2_PICPA	108 kDa	TRUE		unknown	1	0	1	0	2	1	0	0	0	0	0	0
429	TRUE	Empty	BA75_03799T0 OS=Komagataella pastoris OX=4922 GN=ATY40_BA7503799 PE=4 SV=1	A0A1B2JEU6_PICPA	124 kDa	TRUE		unknown	0	0	2	0	4	0	0	0	0	3	1	0
430	TRUE	Empty	tr|C4R7F7|C4R7F7_KOMPG-DECOY	tr|C4R7F7|C4R7F7_KOMPG-DECOY (+1)	?	TRUE		unknown	4	0	1	0	3	4	0	0	0	5	0	0
431	TRUE	Empty	tr|A0A1B2J6G5|A0A1B2J6G5_PICPA-DECOY	tr|A0A1B2J6G5|A0A1B2J6G5_PICPA-DECOY	?	TRUE		unknown	2	0	0	0	1	2	0	0	0	2	0	0
432	TRUE	Empty	non-specific serine/threonine protein kinase OS=Komagataella phaffii (strain GS115 / ATCC 20864) OX=644223 GN=PAS_chr1-3_0143 PE=3 SV=1	C4QVC9_KOMPG (+1)	331 kDa	TRUE		unknown	1	0	1	0	0	1	0	0	0	2	1	0
433	TRUE	Empty	Cluster of tr|A0A1B2JBP0|A0A1B2JBP0_PICPA-DECOY	tr|A0A1B2JBP0|A0A1B2JBP0_PICPA-DECOY	?	TRUE		unknown	0	0	1	3	0	2	0	1	1	1	0	0
433.1	TRUE	Empty	tr|A0A1B2JBP0|A0A1B2JBP0_PICPA-DECOY	tr|A0A1B2JBP0|A0A1B2JBP0_PICPA-DECOY	?	TRUE		unknown	0	0	1	3	0	2	0	1	1	1	0	0
433.2	TRUE	Empty	tr|C4R737|C4R737_KOMPG-DECOY	tr|C4R737|C4R737_KOMPG-DECOY (+1)	?	TRUE		unknown	0	0	0	2	0	2	0	0	1	1	0	0
434	TRUE	Empty	Cluster of BA75_00534T0 OS=Komagataella pastoris OX=4922 GN=ARO80 PE=4 SV=1 (A0A1B2J996_PICPA)	A0A1B2J996_PICPA [2]	104 kDa	TRUE		unknown	2	0	0	1	0	1	0	0	0	1	0	0
434.1	TRUE	Empty	BA75_00534T0 OS=Komagataella pastoris OX=4922 GN=ARO80 PE=4 SV=1	A0A1B2J996_PICPA	104 kDa	TRUE		unknown	2	0	0	1	0	1	0	0	0	0	0	0
434.2	TRUE	Empty	Zinc finger transcriptional activator of the Zn2Cys6 family OS=Komagataella phaffii (strain GS115 / ATCC 20864) OX=644223 GN=PAS_chr3_0503 PE=4 SV=1	C4R4R4_KOMPG (+1)	104 kDa	TRUE		unknown	2	0	0	1	0	1	0	0	0	1	0	0
435	TRUE	Empty	Cluster of cysteine desulfurase OS=Komagataella pastoris OX=4922 GN=NFS1 PE=3 SV=1 (A0A1B2J944_PICPA)	A0A1B2J944_PICPA	54 kDa	TRUE		unknown	1	0	1	0	1	1	0	0	0	3	4	0
435.1	TRUE	Empty	cysteine desulfurase OS=Komagataella pastoris OX=4922 GN=NFS1 PE=3 SV=1	A0A1B2J944_PICPA	54 kDa	TRUE		unknown	1	0	1	0	1	1	0	0	0	3	4	0
435.2	TRUE	Empty	cysteine desulfurase OS=Komagataella phaffii (strain GS115 / ATCC 20864) OX=644223 GN=PAS_chr3_0037 PE=3 SV=1	C4R3C8_KOMPG (+1)	51 kDa	TRUE		unknown	1	0	1	0	1	0	0	0	0	3	3	0
436	TRUE	Empty	Cluster of Guanine nucleotide exchange factor for ADP ribosylation factors (ARFs) OS=Komagataella phaffii (strain GS115 / ATCC 20864) OX=644223 GN=PAS_chr1-4_0432 PE=4 SV=1 (C4QYF9_KOMPG)	C4QYF9_KOMPG	172 kDa	TRUE		unknown	0	0	0	0	2	1	0	0	1	3	0	0
436.1	TRUE	Empty	Guanine nucleotide exchange factor for ADP ribosylation factors (ARFs) OS=Komagataella phaffii (strain GS115 / ATCC 20864) OX=644223 GN=PAS_chr1-4_0432 PE=4 SV=1	C4QYF9_KOMPG (+1)	172 kDa	TRUE		unknown	0	0	0	0	1	0	0	0	1	1	0	0
436.2	TRUE	Empty	BA75_03979T0 OS=Komagataella pastoris OX=4922 GN=GEA2 PE=4 SV=1	A0A1B2JEZ9_PICPA	172 kDa	TRUE		unknown	0	0	0	0	2	1	0	0	0	2	0	0
437	TRUE	Empty	Cluster of tr|A0A1B2JEN4|A0A1B2JEN4_PICPA-DECOY	tr|A0A1B2JEN4|A0A1B2JEN4_PICPA-DECOY	?	TRUE		unknown	0	0	0	0	1	1	0	0	0	0	2	0
437.1	TRUE	Empty	tr|A0A1B2JEN4|A0A1B2JEN4_PICPA-DECOY	tr|A0A1B2JEN4|A0A1B2JEN4_PICPA-DECOY	?	TRUE		unknown	0	0	0	0	0	1	0	0	0	0	2	0
437.2	TRUE	Empty	tr|C4QYZ1|C4QYZ1_KOMPG-DECOY	tr|C4QYZ1|C4QYZ1_KOMPG-DECOY	?	TRUE		unknown	0	0	0	0	1	1	0	0	0	0	1	0
437.3	TRUE	Empty	tr|F2QQ53|F2QQ53_KOMPC-DECOY	tr|F2QQ53|F2QQ53_KOMPC-DECOY	?	TRUE		unknown	0	0	0	0	0	1	0	0	0	0	0	0
437.4	TRUE	Empty	tr|F2QQ52|F2QQ52_KOMPC-DECOY	tr|F2QQ52|F2QQ52_KOMPC-DECOY	?	TRUE		unknown	0	0	0	0	1	0	0	0	0	0	0	0
438	TRUE	Empty	Cluster of tr|C4QVI8|C4QVI8_KOMPG-DECOY	tr|C4QVI8|C4QVI8_KOMPG-DECOY	?	TRUE		unknown	1	0	0	0	4	1	0	0	0	2	0	0
438.1	TRUE	Empty	tr|C4QVI8|C4QVI8_KOMPG-DECOY	tr|C4QVI8|C4QVI8_KOMPG-DECOY (+1)	?	TRUE		unknown	1	0	0	0	2	1	0	0	0	2	0	0
438.2	TRUE	Empty	tr|A0A1B2J6Z0|A0A1B2J6Z0_PICPA-DECOY	tr|A0A1B2J6Z0|A0A1B2J6Z0_PICPA-DECOY	?	TRUE		unknown	1	0	0	0	4	1	0	0	0	2	0	0
439	TRUE	Empty	tr|C4R6D1|C4R6D1_KOMPG-DECOY	tr|C4R6D1|C4R6D1_KOMPG-DECOY (+1)	?	TRUE		unknown	2	0	2	0	2	1	0	0	1	2	2	0
440	TRUE	Empty	tr|C4R1U8|C4R1U8_KOMPG-DECOY	tr|C4R1U8|C4R1U8_KOMPG-DECOY (+1)	?	TRUE		unknown	0	0	2	0	1	1	0	0	1	1	1	0
441	TRUE	Empty	Cluster of Ubiquitin-protein ligase, member of the cullin family with similarity to Cdc53p and human CUL3 OS=Komagataella phaffii (strain GS115 / ATCC 20864) OX=644223 GN=PAS_chr2-1_0369 PE=3 SV=1 (C4R0G6_KOMPG)	C4R0G6_KOMPG [3]	90 kDa	TRUE		unknown	1	0	1	0	3	2	0	0	1	2	0	0
441.1	TRUE	Empty	Ubiquitin-protein ligase, member of the cullin family with similarity to Cdc53p and human CUL3 OS=Komagataella phaffii (strain GS115 / ATCC 20864) OX=644223 GN=PAS_chr2-1_0369 PE=3 SV=1	C4R0G6_KOMPG (+1)	90 kDa	TRUE		unknown	0	0	0	0	1	1	0	0	0	2	0	0
441.2	TRUE	Empty	BA75_02815T0 OS=Komagataella pastoris OX=4922 GN=CUL3 PE=3 SV=1	A0A1B2JCF7_PICPA	90 kDa	TRUE		unknown	1	0	1	0	3	2	0	0	1	1	0	0
442	TRUE	Empty	Cluster of tr|A0A1B2JGK0|A0A1B2JGK0_PICPA-DECOY	tr|A0A1B2JGK0|A0A1B2JGK0_PICPA-DECOY [2]	?	TRUE		unknown	0	0	2	0	1	1	0	0	3	1	0	0
442.1	TRUE	Empty	tr|A0A1B2JGK0|A0A1B2JGK0_PICPA-DECOY	tr|A0A1B2JGK0|A0A1B2JGK0_PICPA-DECOY	?	TRUE		unknown	0	0	1	0	1	0	0	0	2	1	0	0
442.2	TRUE	Empty	tr|C4QYF1|C4QYF1_KOMPG-DECOY	tr|C4QYF1|C4QYF1_KOMPG-DECOY (+1)	?	TRUE		unknown	0	0	2	0	0	1	0	0	3	1	0	0
443	TRUE	Empty	Cluster of tr|A0A1B2JGI7|A0A1B2JGI7_PICPA-DECOY	tr|A0A1B2JGI7|A0A1B2JGI7_PICPA-DECOY	?	TRUE		unknown	1	0	1	0	3	0	0	0	1	2	0	0
443.1	TRUE	Empty	tr|A0A1B2JGI7|A0A1B2JGI7_PICPA-DECOY	tr|A0A1B2JGI7|A0A1B2JGI7_PICPA-DECOY	?	TRUE		unknown	1	0	1	0	2	0	0	0	1	2	0	0
443.2	TRUE	Empty	tr|C4R6J3|C4R6J3_KOMPG-DECOY	tr|C4R6J3|C4R6J3_KOMPG-DECOY	?	TRUE		unknown	0	0	0	0	1	0	0	0	1	1	0	0
443.3	TRUE	Empty	tr|A0A1G4KQ57|A0A1G4KQ57_KOMPC-DECOY	tr|A0A1G4KQ57|A0A1G4KQ57_KOMPC-DECOY	?	TRUE		unknown	0	0	0	0	0	0	0	0	1	1	0	0
444	TRUE	Empty	Cluster of non-specific serine/threonine protein kinase OS=Komagataella pastoris OX=4922 GN=ALK2 PE=4 SV=1 (A0A1B2JIG5_PICPA)	A0A1B2JIG5_PICPA	78 kDa	TRUE		unknown	0	0	1	0	5	1	0	1	0	5	0	0
444.1	TRUE	Empty	non-specific serine/threonine protein kinase OS=Komagataella pastoris OX=4922 GN=ALK2 PE=4 SV=1	A0A1B2JIG5_PICPA	78 kDa	TRUE		unknown	0	0	1	0	5	1	0	1	0	5	0	0
444.2	TRUE	Empty	non-specific serine/threonine protein kinase OS=Komagataella phaffii (strain GS115 / ATCC 20864) OX=644223 GN=PAS_chr4_0404 PE=4 SV=1	C4R7S8_KOMPG (+1)	78 kDa	TRUE		unknown	0	0	0	0	2	1	0	0	0	4	0	0
445	TRUE	Empty	Cluster of Regulatory subunit of trehalose-6-phosphate synthase/phosphatase complex OS=Komagataella phaffii (strain GS115 / ATCC 20864) OX=644223 GN=PAS_chr2-1_0739 PE=4 SV=1 (C4R1L5_KOMPG)	C4R1L5_KOMPG [3]	116 kDa	TRUE		unknown	0	0	0	1	1	0	0	0	1	4	2	0
445.1	TRUE	Empty	Regulatory subunit of trehalose-6-phosphate synthase/phosphatase complex OS=Komagataella phaffii (strain GS115 / ATCC 20864) OX=644223 GN=PAS_chr2-1_0739 PE=4 SV=1	C4R1L5_KOMPG (+1)	116 kDa	TRUE		unknown	0	0	0	1	1	0	0	0	1	3	1	0
445.2	TRUE	Empty	BA75_02413T0 OS=Komagataella pastoris OX=4922 GN=TPS3 PE=4 SV=1	A0A1B2JCX3_PICPA	117 kDa	TRUE		unknown	0	0	0	1	1	0	0	0	1	4	2	0
446	TRUE	Empty	Cluster of tr|C4R0X7|C4R0X7_KOMPG-DECOY	tr|C4R0X7|C4R0X7_KOMPG-DECOY [2]	?	TRUE		unknown	0	0	1	0	2	2	0	0	0	1	0	0
446.1	TRUE	Empty	tr|C4R0X7|C4R0X7_KOMPG-DECOY	tr|C4R0X7|C4R0X7_KOMPG-DECOY (+1)	?	TRUE		unknown	0	0	1	0	2	2	0	0	0	1	0	0
446.2	TRUE	Empty	tr|A0A1B2JA75|A0A1B2JA75_PICPA-DECOY	tr|A0A1B2JA75|A0A1B2JA75_PICPA-DECOY	?	TRUE		unknown	0	0	0	0	1	2	0	0	0	1	0	0
447	TRUE	Empty	Cluster of tr|C4R324|C4R324_KOMPG-DECOY	tr|C4R324|C4R324_KOMPG-DECOY	?	TRUE		unknown	2	0	0	0	2	2	0	0	0	1	0	0
447.1	TRUE	Empty	tr|C4R324|C4R324_KOMPG-DECOY	tr|C4R324|C4R324_KOMPG-DECOY (+1)	?	TRUE		unknown	1	0	0	0	0	1	0	0	0	1	0	0
447.2	TRUE	Empty	tr|A0A1B2JAS1|A0A1B2JAS1_PICPA-DECOY	tr|A0A1B2JAS1|A0A1B2JAS1_PICPA-DECOY	?	TRUE		unknown	2	0	0	0	2	2	0	0	0	1	0	0
448	TRUE	Empty	BA75_01969T0 OS=Komagataella pastoris OX=4922 GN=BEM2 PE=4 SV=1	A0A1B2JB09_PICPA	223 kDa	TRUE		unknown	2	0	2	0	4	1	0	1	1	1	0	0
449	TRUE	Empty	BA75_02572T0 OS=Komagataella pastoris OX=4922 GN=SEN1 PE=4 SV=1	A0A1B2JCE6_PICPA	243 kDa	TRUE		unknown	0	0	2	1	0	2	0	0	1	4	0	0
450	TRUE	Empty	tr|A0A1B2J848|A0A1B2J848_PICPA-DECOY	tr|A0A1B2J848|A0A1B2J848_PICPA-DECOY	?	TRUE		unknown	1	0	0	0	1	1	0	0	2	2	0	0
451	TRUE	Empty	tr|A0A1B2JD80|A0A1B2JD80_PICPA-DECOY	tr|A0A1B2JD80|A0A1B2JD80_PICPA-DECOY	?	TRUE		unknown	3	0	0	1	2	1	0	0	2	0	1	0
452	TRUE	Empty	tr|A0A1B2JIP7|A0A1B2JIP7_PICPA-DECOY	tr|A0A1B2JIP7|A0A1B2JIP7_PICPA-DECOY	?	TRUE		unknown	8	0	1	0	0	1	0	0	1	5	3	0
453	TRUE	Empty	Cluster of Golgi matrix protein involved in the structural organization of the cis-Golgi OS=Komagataella phaffii (strain GS115 / ATCC 20864) OX=644223 GN=PAS_chr1-4_0268 PE=4 SV=1 (C4QXX9_KOMPG)	C4QXX9_KOMPG [2]	71 kDa	TRUE		unknown	1	0	1	1	0	0	0	0	0	2	0	0
453.1	TRUE	Empty	Golgi matrix protein involved in the structural organization of the cis-Golgi OS=Komagataella phaffii (strain GS115 / ATCC 20864) OX=644223 GN=PAS_chr1-4_0268 PE=4 SV=1	C4QXX9_KOMPG (+1)	71 kDa	TRUE		unknown	1	0	1	1	0	0	0	0	0	2	0	0
453.2	TRUE	Empty	BA75_00797T0 OS=Komagataella pastoris OX=4922 GN=RUD3 PE=4 SV=1	A0A1B2J846_PICPA	72 kDa	TRUE		unknown	0	0	1	1	0	0	0	0	0	1	0	0
454	TRUE	Empty	Cluster of Polyadenylate-binding protein OS=Komagataella phaffii (strain GS115 / ATCC 20864) OX=644223 GN=PAS_chr2-1_0097 PE=3 SV=1 (C4QZM5_KOMPG)	C4QZM5_KOMPG [3]	70 kDa	TRUE		unknown	2	0	2	1	5	0	0	0	0	0	0	0
454.1	TRUE	Empty	Polyadenylate-binding protein OS=Komagataella phaffii (strain GS115 / ATCC 20864) OX=644223 GN=PAS_chr2-1_0097 PE=3 SV=1	C4QZM5_KOMPG (+1)	70 kDa	TRUE		unknown	1	0	2	1	5	0	0	0	0	0	0	0
454.2	TRUE	Empty	Polyadenylate-binding protein OS=Komagataella pastoris OX=4922 GN=PAB1 PE=3 SV=1	A0A1B2JHQ1_PICPA	70 kDa	TRUE		unknown	2	0	1	1	5	0	0	0	0	0	0	0
455	TRUE	Empty	Cluster of tr|C4R417|C4R417_KOMPG-DECOY	tr|C4R417|C4R417_KOMPG-DECOY [2]	?	TRUE		unknown	0	0	0	1	5	4	0	0	0	0	1	0
455.1	TRUE	Empty	tr|C4R417|C4R417_KOMPG-DECOY	tr|C4R417|C4R417_KOMPG-DECOY	?	TRUE		unknown	0	0	0	0	4	4	0	0	0	0	1	0
455.2	TRUE	Empty	tr|A0A1B2J7T8|A0A1B2J7T8_PICPA-DECOY	tr|A0A1B2J7T8|A0A1B2J7T8_PICPA-DECOY	?	TRUE		unknown	0	0	0	1	1	2	0	0	0	0	1	0
456	TRUE	Empty	Cluster of tr|C4QXY0|C4QXY0_KOMPG-DECOY	tr|C4QXY0|C4QXY0_KOMPG-DECOY	?	TRUE		unknown	0	0	0	0	1	1	0	0	1	2	0	0
456.1	TRUE	Empty	tr|C4QXY0|C4QXY0_KOMPG-DECOY	tr|C4QXY0|C4QXY0_KOMPG-DECOY (+1)	?	TRUE		unknown	0	0	0	0	0	0	0	0	1	1	0	0
456.2	TRUE	Empty	tr|A0A1B2J667|A0A1B2J667_PICPA-DECOY	tr|A0A1B2J667|A0A1B2J667_PICPA-DECOY	?	TRUE		unknown	0	0	0	0	1	1	0	0	1	1	0	0
457	TRUE	Empty	Cluster of DNA-directed RNA polymerase subunit beta OS=Komagataella phaffii (strain GS115 / ATCC 20864) OX=644223 GN=PAS_chr2-1_0125 PE=1 SV=1 (C4QZQ7_KOMPG)	C4QZQ7_KOMPG [2]	140 kDa	TRUE		unknown	1	0	1	0	3	2	0	0	3	0	2	0
457.1	TRUE	Empty	DNA-directed RNA polymerase subunit beta OS=Komagataella phaffii (strain GS115 / ATCC 20864) OX=644223 GN=PAS_chr2-1_0125 PE=1 SV=1	C4QZQ7_KOMPG (+1)	140 kDa	TRUE		unknown	1	0	1	0	3	2	0	0	3	0	2	0
457.2	TRUE	Empty	DNA-directed RNA polymerase subunit beta (Fragment) OS=Komagataella pastoris OX=4922 PE=3 SV=1	I7B0D6_PICPA	87 kDa	TRUE		unknown	0	0	0	0	0	0	0	0	0	0	1	0
458	TRUE	Empty	Cluster of tr|C4QWK1|C4QWK1_KOMPG-DECOY	tr|C4QWK1|C4QWK1_KOMPG-DECOY [3]	?	TRUE		unknown	1	0	0	0	2	0	0	0	1	3	0	0
458.1	TRUE	Empty	tr|C4QWK1|C4QWK1_KOMPG-DECOY	tr|C4QWK1|C4QWK1_KOMPG-DECOY (+1)	?	TRUE		unknown	1	0	0	0	1	0	0	0	1	3	0	0
458.2	TRUE	Empty	tr|A0A1B2J6D9|A0A1B2J6D9_PICPA-DECOY	tr|A0A1B2J6D9|A0A1B2J6D9_PICPA-DECOY	?	TRUE		unknown	0	0	0	0	2	0	0	0	1	1	0	0
459	TRUE	Empty	Cluster of Protein required for ribosomal large subunit maturation, functionally redundant with Ssf1p OS=Komagataella phaffii (strain GS115 / ATCC 20864) OX=644223 GN=PAS_chr1-1_0291 PE=4 SV=1 (C4QWP4_KOMPG)	C4QWP4_KOMPG [2]	47 kDa	TRUE		unknown	1	0	1	0	2	1	0	0	0	1	1	0
459.1	TRUE	Empty	Protein required for ribosomal large subunit maturation, functionally redundant with Ssf1p OS=Komagataella phaffii (strain GS115 / ATCC 20864) OX=644223 GN=PAS_chr1-1_0291 PE=4 SV=1	C4QWP4_KOMPG (+1)	47 kDa	TRUE		unknown	1	0	1	0	2	0	0	0	0	1	0	0
459.2	TRUE	Empty	BA75_01245T0 OS=Komagataella pastoris OX=4922 GN=SSF2 PE=4 SV=1	A0A1B2J9F8_PICPA	46 kDa	TRUE		unknown	0	0	1	0	1	1	0	0	0	1	1	0
460	TRUE	Empty	Cluster of tr|C4QY67|C4QY67_KOMPG-DECOY	tr|C4QY67|C4QY67_KOMPG-DECOY [3]	?	TRUE		unknown	1	0	0	1	2	4	0	0	0	3	1	0
460.1	TRUE	Empty	tr|C4QY67|C4QY67_KOMPG-DECOY	tr|C4QY67|C4QY67_KOMPG-DECOY (+1)	?	TRUE		unknown	1	0	0	1	1	4	0	0	0	3	1	0
460.2	TRUE	Empty	tr|A0A1B2J8F2|A0A1B2J8F2_PICPA-DECOY	tr|A0A1B2J8F2|A0A1B2J8F2_PICPA-DECOY	?	TRUE		unknown	0	0	0	0	1	3	0	0	0	2	1	0
461	TRUE	Empty	Cluster of BA75_02565T0 OS=Komagataella pastoris OX=4922 GN=YLR422W PE=3 SV=1 (A0A1B2JB32_PICPA)	A0A1B2JB32_PICPA	210 kDa	TRUE		unknown	0	0	0	0	3	0	0	0	0	2	0	0
461.1	TRUE	Empty	BA75_02565T0 OS=Komagataella pastoris OX=4922 GN=YLR422W PE=3 SV=1	A0A1B2JB32_PICPA	210 kDa	TRUE		unknown	0	0	0	0	3	0	0	0	0	2	0	0
461.2	TRUE	Empty	DOCKER domain-containing protein OS=Komagataella phaffii (strain GS115 / ATCC 20864) OX=644223 GN=PAS_chr2-1_0599 PE=3 SV=1	C4R162_KOMPG (+1)	210 kDa	TRUE		unknown	0	0	0	0	0	0	0	0	0	0	0	0
462	TRUE	Empty	BA75_04643T0 OS=Komagataella pastoris OX=4922 GN=ACK1 PE=4 SV=1	A0A1B2JHP9_PICPA	114 kDa	TRUE		unknown	0	0	1	0	4	1	0	0	1	0	0	0
463	TRUE	Empty	RNA-dependent ATPase RNA helicase (DEIH box) OS=Komagataella phaffii (strain GS115 / ATCC 20864) OX=644223 GN=PAS_chr1-4_0051 PE=4 SV=1	C4QXA9_KOMPG (+1)	246 kDa	TRUE		unknown	0	0	2	0	5	2	0	0	3	5	1	0
464	TRUE	Empty	tr|C4QXC5|C4QXC5_KOMPG-DECOY	tr|C4QXC5|C4QXC5_KOMPG-DECOY (+1)	?	TRUE		unknown	2	0	5	0	3	2	0	0	0	1	2	0
465	TRUE	Empty	tr|A0A1B2J8Y5|A0A1B2J8Y5_PICPA-DECOY	tr|A0A1B2J8Y5|A0A1B2J8Y5_PICPA-DECOY	?	TRUE		unknown	3	0	3	0	4	2	0	0	2	2	1	0
466	TRUE	Empty	Uncharacterized protein OS=Komagataella phaffii (strain GS115 / ATCC 20864) OX=644223 GN=PAS_chr4_0631 PE=4 SV=1	C4R8G6_KOMPG (+1)	46 kDa	TRUE		unknown	7	0	0	0	1	5	0	0	0	0	4	0
467	TRUE	Empty	Cluster of Heat shock protein Hsp90 OS=Komagataella phaffii (strain GS115 / ATCC 20864) OX=644223 GN=PAS_chr1-4_0130 PE=3 SV=1 (C4QXI5_KOMPG)	C4QXI5_KOMPG [3]	81 kDa	TRUE		unknown	5	3	2	0	2	1	1	4	1	3	3	2
467.1	TRUE	Empty	Heat shock protein Hsp90 OS=Komagataella phaffii (strain GS115 / ATCC 20864) OX=644223 GN=PAS_chr1-4_0130 PE=3 SV=1	C4QXI5_KOMPG (+1)	81 kDa	TRUE		unknown	5	3	2	0	1	1	1	4	1	3	3	2
467.2	TRUE	Empty	BA75_00945T0 OS=Komagataella pastoris OX=4922 GN=HSP82 PE=3 SV=1	A0A1B2J6S7_PICPA	81 kDa	TRUE		unknown	5	3	2	0	2	1	1	3	1	3	3	2
468	TRUE	Empty	Cluster of tr|C4R7R8|C4R7R8_KOMPG-DECOY	tr|C4R7R8|C4R7R8_KOMPG-DECOY [2]	?	TRUE		unknown	0	0	0	1	1	3	0	0	0	1	0	0
468.1	TRUE	Empty	tr|C4R7R8|C4R7R8_KOMPG-DECOY	tr|C4R7R8|C4R7R8_KOMPG-DECOY (+1)	?	TRUE		unknown	0	0	0	1	1	3	0	0	0	0	0	0
468.2	TRUE	Empty	tr|A0A1B2JBY2|A0A1B2JBY2_PICPA-DECOY	tr|A0A1B2JBY2|A0A1B2JBY2_PICPA-DECOY	?	TRUE		unknown	0	0	0	1	1	3	0	0	0	1	0	0
469	TRUE	Empty	Cluster of tr|A0A1B2JFN5|A0A1B2JFN5_PICPA-DECOY	tr|A0A1B2JFN5|A0A1B2JFN5_PICPA-DECOY	?	TRUE		unknown	6	0	0	0	1	6	0	1	1	1	2	0
469.1	TRUE	Empty	tr|A0A1B2JFN5|A0A1B2JFN5_PICPA-DECOY	tr|A0A1B2JFN5|A0A1B2JFN5_PICPA-DECOY	?	TRUE		unknown	6	0	0	0	1	6	0	1	1	0	2	0
469.2	TRUE	Empty	tr|C4QZ71|C4QZ71_KOMPG-DECOY	tr|C4QZ71|C4QZ71_KOMPG-DECOY (+1)	?	TRUE		unknown	6	0	0	0	1	5	0	1	1	1	1	0
470	TRUE	Empty	Cluster of tr|A0A1B2J630|A0A1B2J630_PICPA-DECOY	tr|A0A1B2J630|A0A1B2J630_PICPA-DECOY	?	TRUE		unknown	1	1	0	0	1	1	0	1	1	2	1	0
470.1	TRUE	Empty	tr|A0A1B2J630|A0A1B2J630_PICPA-DECOY	tr|A0A1B2J630|A0A1B2J630_PICPA-DECOY	?	TRUE		unknown	1	1	0	0	1	1	0	1	1	2	1	0
470.2	TRUE	Empty	tr|C4R3X1|C4R3X1_KOMPG-DECOY	tr|C4R3X1|C4R3X1_KOMPG-DECOY (+1)	?	TRUE		unknown	0	0	0	0	1	0	0	0	0	0	0	0
471	TRUE	Empty	Cluster of BA75_04656T0 OS=Komagataella pastoris OX=4922 GN=UTP14 PE=4 SV=1 (A0A1B2JI37_PICPA)	A0A1B2JI37_PICPA [2]	99 kDa	TRUE		unknown	0	0	2	0	1	1	0	0	2	0	0	0
471.1	TRUE	Empty	BA75_04656T0 OS=Komagataella pastoris OX=4922 GN=UTP14 PE=4 SV=1	A0A1B2JI37_PICPA	99 kDa	TRUE		unknown	0	0	1	0	0	1	0	0	1	0	0	0
471.2	TRUE	Empty	Nucleolar protein, component of the small subunit (SSU) processome containing the U3 snoRNA OS=Komagataella phaffii (strain GS115 / ATCC 20864) OX=644223 GN=PAS_chr4_0667 PE=4 SV=1	C4R8K0_KOMPG (+1)	99 kDa	TRUE		unknown	0	0	2	0	1	0	0	0	2	0	0	0
472	TRUE	Empty	PH domain-containing protein OS=Komagataella phaffii (strain GS115 / ATCC 20864) OX=644223 GN=PAS_chr1-4_0435 PE=4 SV=1	C4QYG2_KOMPG (+1)	126 kDa	TRUE		unknown	1	0	0	0	3	0	0	0	0	1	0	0
473	TRUE	Empty	tr|C4QXA9|C4QXA9_KOMPG-DECOY	tr|C4QXA9|C4QXA9_KOMPG-DECOY (+1)	?	TRUE		unknown	2	0	1	0	4	3	0	1	0	3	1	0
474	TRUE	Empty	tr|C4R276|C4R276_KOMPG-DECOY	tr|C4R276|C4R276_KOMPG-DECOY (+1)	?	TRUE		unknown	3	0	3	0	0	3	0	0	0	4	0	0
475	TRUE	Empty	Uncharacterized protein OS=Komagataella phaffii (strain ATCC 76273 / CBS 7435 / CECT 11047 / NRRL Y-11430 / Wegner 21-1) OX=981350 GN=PP7435_Chr1-0896 PE=4 SV=1	F2QN76_KOMPC	93 kDa	TRUE		unknown	0	0	0	0	3	2	0	0	1	1	1	0
476	TRUE	Empty	Cluster of tr|C4R275|C4R275_KOMPG-DECOY	tr|C4R275|C4R275_KOMPG-DECOY	?	TRUE		unknown	1	0	0	0	3	4	0	1	1	2	2	0
476.1	TRUE	Empty	tr|C4R275|C4R275_KOMPG-DECOY	tr|C4R275|C4R275_KOMPG-DECOY	?	TRUE		unknown	1	0	0	0	3	4	0	1	1	2	2	0
476.2	TRUE	Empty	tr|F2QRJ3|F2QRJ3_KOMPC-DECOY	tr|F2QRJ3|F2QRJ3_KOMPC-DECOY	?	TRUE		unknown	0	0	0	0	0	0	0	0	0	0	0	0
477	TRUE	Empty	Cluster of BA75_02664T0 OS=Komagataella pastoris OX=4922 GN=MBP1 PE=4 SV=1 (A0A1B2JCF1_PICPA)	A0A1B2JCF1_PICPA	89 kDa	TRUE		unknown	1	0	5	3	7	0	0	0	0	2	0	0
477.1	TRUE	Empty	BA75_02664T0 OS=Komagataella pastoris OX=4922 GN=MBP1 PE=4 SV=1	A0A1B2JCF1_PICPA	89 kDa	TRUE		unknown	1	0	5	3	7	0	0	0	0	2	0	0
477.2	TRUE	Empty	Transcription factor involved in regulation of cell cycle progression from G1 to S phase OS=Komagataella phaffii (strain GS115 / ATCC 20864) OX=644223 GN=PAS_chr2-1_0508 PE=4 SV=1	C4R0W6_KOMPG (+1)	89 kDa	TRUE		unknown	1	0	5	3	6	0	0	0	0	2	0	0
478	TRUE	Empty	Cluster of tr|A0A1B2JA47|A0A1B2JA47_PICPA-DECOY	tr|A0A1B2JA47|A0A1B2JA47_PICPA-DECOY	?	TRUE		unknown	0	0	1	1	2	2	0	0	1	0	1	0
478.1	TRUE	Empty	tr|A0A1B2JA47|A0A1B2JA47_PICPA-DECOY	tr|A0A1B2JA47|A0A1B2JA47_PICPA-DECOY	?	TRUE		unknown	0	0	1	1	2	2	0	0	1	0	0	0
478.2	TRUE	Empty	tr|C4R7H9|C4R7H9_KOMPG-DECOY	tr|C4R7H9|C4R7H9_KOMPG-DECOY (+1)	?	TRUE		unknown	0	0	1	1	1	1	0	0	1	0	1	0
479	TRUE	Empty	Cluster of Nucleolar GTP-binding protein 1 OS=Komagataella phaffii (strain GS115 / ATCC 20864) OX=644223 GN=PAS_chr4_0105 PE=3 SV=1 (C4R6V6_KOMPG)	C4R6V6_KOMPG [2]	73 kDa	TRUE		unknown	1	0	1	0	2	1	0	0	1	4	0	0
479.1	TRUE	Empty	Nucleolar GTP-binding protein 1 OS=Komagataella phaffii (strain GS115 / ATCC 20864) OX=644223 GN=PAS_chr4_0105 PE=3 SV=1	C4R6V6_KOMPG (+1)	73 kDa	TRUE		unknown	1	0	1	0	2	1	0	0	1	4	0	0
479.2	TRUE	Empty	Nucleolar GTP-binding protein 1 OS=Komagataella pastoris OX=4922 GN=NOG1 PE=3 SV=1	A0A1B2JDP5_PICPA	73 kDa	TRUE		unknown	1	0	1	0	1	1	0	0	0	4	0	0
480	TRUE	Empty	Cluster of Pyruvate carboxylase OS=Komagataella phaffii (strain GS115 / ATCC 20864) OX=644223 GN=PAS_chr2-2_0024 PE=4 SV=1 (C4R339_KOMPG)	C4R339_KOMPG [2]	129 kDa	TRUE		unknown	1	0	0	0	1	0	0	0	0	4	0	0
480.1	TRUE	Empty	Pyruvate carboxylase OS=Komagataella phaffii (strain GS115 / ATCC 20864) OX=644223 GN=PAS_chr2-2_0024 PE=4 SV=1	C4R339_KOMPG (+1)	129 kDa	TRUE		unknown	0	0	0	0	0	0	0	0	0	4	0	0
480.2	TRUE	Empty	Pyruvate carboxylase OS=Komagataella pastoris OX=4922 GN=PYC1 PE=3 SV=1	PYC_PICPA	131 kDa	TRUE		unknown	1	0	0	0	1	0	0	0	0	3	0	0
481	TRUE	Empty	Cluster of BA75_02978T0 OS=Komagataella pastoris OX=4922 GN=SLN1 PE=4 SV=1 (A0A1B2JAP2_PICPA)	A0A1B2JAP2_PICPA [3]	135 kDa	TRUE		unknown	1	0	1	0	4	2	0	0	0	3	1	0
481.1	TRUE	Empty	BA75_02978T0 OS=Komagataella pastoris OX=4922 GN=SLN1 PE=4 SV=1	A0A1B2JAP2_PICPA	135 kDa	TRUE		unknown	1	0	1	0	4	1	0	0	0	2	0	0
481.2	TRUE	Empty	Histidine kinase osmosensor that regulates a MAP kinase cascade OS=Komagataella phaffii (strain GS115 / ATCC 20864) OX=644223 GN=PAS_chr4_0315 PE=4 SV=1	C4R7I2_KOMPG (+1)	134 kDa	TRUE		unknown	0	0	0	0	2	2	0	0	0	1	1	0
482	TRUE	Empty	Cluster of tr|C4R4J6|C4R4J6_KOMPG-DECOY	tr|C4R4J6|C4R4J6_KOMPG-DECOY [2]	?	TRUE		unknown	1	0	0	0	0	3	0	0	0	0	0	0
482.1	TRUE	Empty	tr|C4R4J6|C4R4J6_KOMPG-DECOY	tr|C4R4J6|C4R4J6_KOMPG-DECOY (+1)	?	TRUE		unknown	1	0	0	0	0	2	0	0	0	0	0	0
482.2	TRUE	Empty	tr|A0A1B2J6Q6|A0A1B2J6Q6_PICPA-DECOY	tr|A0A1B2J6Q6|A0A1B2J6Q6_PICPA-DECOY	?	TRUE		unknown	1	0	0	0	0	3	0	0	0	0	0	0
483	TRUE	Empty	Protein required for accurate chromosome segregation OS=Komagataella phaffii (strain GS115 / ATCC 20864) OX=644223 GN=PAS_chr1-1_0139 PE=4 SV=1	C4QW80_KOMPG (+1)	161 kDa	TRUE		unknown	1	0	4	2	6	3	0	0	0	0	0	0
484	TRUE	Empty	BA75_00644T0 OS=Komagataella pastoris OX=4922 GN=ATY40_BA7500644 PE=4 SV=1	A0A1B2J9W2_PICPA	247 kDa	TRUE		unknown	1	0	1	2	1	1	0	1	0	4	2	0
485	TRUE	Empty	HTH APSES-type domain-containing protein OS=Komagataella phaffii (strain GS115 / ATCC 20864) OX=644223 GN=PAS_chr2-1_0507 PE=4 SV=1	C4R0W5_KOMPG (+1)	99 kDa	TRUE		unknown	0	0	0	2	2	1	0	0	1	0	0	0
486	TRUE	Empty	tr|A0A1B2J6E5|A0A1B2J6E5_PICPA-DECOY	tr|A0A1B2J6E5|A0A1B2J6E5_PICPA-DECOY	?	TRUE		unknown	0	0	1	1	3	0	0	0	1	1	1	0
487	TRUE	Empty	Cluster of DNA-directed RNA polymerase subunit beta OS=Komagataella pastoris OX=4922 GN=RPA135 PE=3 SV=1 (A0A1B2J613_PICPA)	A0A1B2J613_PICPA [2]	131 kDa	TRUE		unknown	0	0	0	0	1	0	0	0	1	2	0	0
487.1	TRUE	Empty	DNA-directed RNA polymerase subunit beta OS=Komagataella pastoris OX=4922 GN=RPA135 PE=3 SV=1	A0A1B2J613_PICPA	131 kDa	TRUE		unknown	0	0	0	0	1	0	0	0	1	1	0	0
487.2	TRUE	Empty	DNA-directed RNA polymerase subunit beta OS=Komagataella phaffii (strain GS115 / ATCC 20864) OX=644223 GN=PAS_chr1-4_0324 PE=3 SV=1	C4QY42_KOMPG (+1)	131 kDa	TRUE		unknown	0	0	0	0	1	0	0	0	1	2	0	0
488	TRUE	Empty	Cluster of BA75_01103T0 OS=Komagataella pastoris OX=4922 GN=ATY40_BA7501103 PE=4 SV=1 (A0A1B2J7D5_PICPA)	A0A1B2J7D5_PICPA [2]	121 kDa	TRUE		unknown	1	0	3	0	2	0	0	0	0	1	1	0
488.1	TRUE	Empty	BA75_01103T0 OS=Komagataella pastoris OX=4922 GN=ATY40_BA7501103 PE=4 SV=1	A0A1B2J7D5_PICPA	121 kDa	TRUE		unknown	1	0	2	0	1	0	0	0	0	1	1	0
488.2	TRUE	Empty	P-type ATPase sodium pump, involved in Na+ and Li+ efflux to allow salt tolerance OS=Komagataella phaffii (strain GS115 / ATCC 20864) OX=644223 GN=PAS_chr1-1_0428 PE=4 SV=1	C4QX33_KOMPG (+1)	121 kDa	TRUE		unknown	1	0	3	0	2	0	0	0	0	0	1	0
489	TRUE	Empty	Cluster of Protein TOS1 OS=Komagataella phaffii (strain GS115 / ATCC 20864) OX=644223 GN=PAS_c034_0034 PE=3 SV=1 (C4R9F6_KOMPG)	C4R9F6_KOMPG [2]	45 kDa	TRUE		unknown	0	14	0	0	0	11	6	0	1	24	3	0
489.1	TRUE	Empty	Protein TOS1 OS=Komagataella phaffii (strain GS115 / ATCC 20864) OX=644223 GN=PAS_c034_0034 PE=3 SV=1	C4R9F6_KOMPG (+1)	45 kDa	TRUE		unknown	0	14	0	0	0	11	6	0	1	24	3	0
489.2	TRUE	Empty	BA75_04321T0 OS=Komagataella pastoris OX=4922 GN=ATY40_BA7504321 PE=3 SV=1	A0A1B2JG30_PICPA	46 kDa	TRUE		unknown	0	0	0	0	0	10	4	0	0	17	0	0
490	TRUE	Empty	BA75_04303T0 OS=Komagataella pastoris OX=4922 GN=ATY40_BA7504303 PE=4 SV=1	A0A1B2JFY8_PICPA	173 kDa	TRUE		unknown	0	0	0	0	4	3	0	0	2	2	0	0
491	TRUE	Empty	Aspartate aminotransferase OS=Komagataella phaffii (strain GS115 / ATCC 20864) OX=644223 GN=PAS_chr1-1_0200 PE=3 SV=1	C4QWE4_KOMPG (+1)	48 kDa			unknown	2	5	1	0	3	1	10	10	0	1	1	15
492	TRUE	Empty	GTPase activating factor OS=Komagataella phaffii (strain ATCC 76273 / CBS 7435 / CECT 11047 / NRRL Y-11430 / Wegner 21-1) OX=981350 GN=IRA1 PE=4 SV=1	F2QX88_KOMPC	300 kDa	TRUE		unknown	2	0	1	0	3	1	0	0	0	3	0	0
493	TRUE	Empty	tr|A0A1B2J608|A0A1B2J608_PICPA-DECOY	tr|A0A1B2J608|A0A1B2J608_PICPA-DECOY	?	TRUE		unknown	2	0	3	0	0	0	0	0	0	0	0	0
494	TRUE	Empty	tr|A0A1B2JBV2|A0A1B2JBV2_PICPA-DECOY	tr|A0A1B2JBV2|A0A1B2JBV2_PICPA-DECOY	?	TRUE		unknown	0	0	2	0	4	1	0	0	1	2	1	0
495	TRUE	Empty	Nuclear pore complex FG-nucleoporin component OS=Komagataella phaffii (strain ATCC 76273 / CBS 7435 / CECT 11047 / NRRL Y-11430 / Wegner 21-1) OX=981350 GN=NUP159 PE=4 SV=1	F2QV48_KOMPC (+1)	134 kDa	TRUE		unknown	0	0	0	0	2	0	0	0	0	0	1	0
496	TRUE	Empty	BA75_03230T0 OS=Komagataella pastoris OX=4922 GN=AIM44 PE=4 SV=1	A0A1B2JCD8_PICPA	89 kDa	TRUE		unknown	0	0	1	2	1	1	0	0	0	1	0	0
497	TRUE	Empty	tr|A0A1B2JFU4|A0A1B2JFU4_PICPA-DECOY	tr|A0A1B2JFU4|A0A1B2JFU4_PICPA-DECOY	?	TRUE		unknown	2	0	0	0	1	0	0	0	0	1	7	0
498	TRUE	Empty	Cluster of tr|A0A1B2J6C7|A0A1B2J6C7_PICPA-DECOY	tr|A0A1B2J6C7|A0A1B2J6C7_PICPA-DECOY [3]	?	TRUE		unknown	2	0	1	1	1	2	0	0	0	1	1	0
498.1	TRUE	Empty	tr|A0A1B2J6C7|A0A1B2J6C7_PICPA-DECOY	tr|A0A1B2J6C7|A0A1B2J6C7_PICPA-DECOY	?	TRUE		unknown	1	0	1	1	1	2	0	0	0	1	1	0
498.2	TRUE	Empty	tr|C4QV13|C4QV13_KOMPG-DECOY	tr|C4QV13|C4QV13_KOMPG-DECOY (+1)	?	TRUE		unknown	2	0	1	1	1	1	0	0	0	0	0	0
499	TRUE	Empty	Cluster of UBA domain-containing protein OS=Komagataella phaffii (strain GS115 / ATCC 20864) OX=644223 GN=PAS_chr3_0132 PE=4 SV=1 (C4R3M5_KOMPG)	C4R3M5_KOMPG [3]	75 kDa	TRUE		unknown	0	0	1	1	2	0	0	0	3	1	1	0
499.1	TRUE	Empty	UBA domain-containing protein OS=Komagataella phaffii (strain GS115 / ATCC 20864) OX=644223 GN=PAS_chr3_0132 PE=4 SV=1	C4R3M5_KOMPG (+1)	75 kDa	TRUE		unknown	0	0	0	1	1	0	0	0	2	1	0	0
499.2	TRUE	Empty	BA75_00124T0 OS=Komagataella pastoris OX=4922 GN=RUP1 PE=4 SV=1	A0A1B2J9F0_PICPA	75 kDa	TRUE		unknown	0	0	1	0	2	0	0	0	1	1	1	0
500	TRUE	Empty	Cluster of S-adenosyl-L-methionine-dependent tRNA: m5C-methyltransferase OS=Komagataella phaffii (strain GS115 / ATCC 20864) OX=644223 GN=PAS_chr4_0445 PE=3 SV=1 (C4R7X3_KOMPG)	C4R7X3_KOMPG [2]	82 kDa	TRUE		unknown	0	0	0	1	1	2	0	0	0	1	1	0
500.1	TRUE	Empty	S-adenosyl-L-methionine-dependent tRNA: m5C-methyltransferase OS=Komagataella phaffii (strain GS115 / ATCC 20864) OX=644223 GN=PAS_chr4_0445 PE=3 SV=1	C4R7X3_KOMPG (+1)	82 kDa	TRUE		unknown	0	0	0	1	1	2	0	0	0	1	1	0
500.2	TRUE	Empty	BA75_04898T0 OS=Komagataella pastoris OX=4922 GN=NCL1 PE=3 SV=1	A0A1B2JH40_PICPA	80 kDa	TRUE		unknown	0	0	0	1	1	2	0	0	0	1	1	0
501	TRUE	Empty	Cluster of DNA-directed DNA polymerase OS=Komagataella pastoris OX=4922 GN=MIP1 PE=4 SV=1 (A0A1B2JGB0_PICPA)	A0A1B2JGB0_PICPA	116 kDa	TRUE		unknown	1	0	1	0	1	3	0	0	0	1	0	0
501.1	TRUE	Empty	DNA-directed DNA polymerase OS=Komagataella pastoris OX=4922 GN=MIP1 PE=4 SV=1	A0A1B2JGB0_PICPA	116 kDa	TRUE		unknown	0	0	1	0	1	3	0	0	0	1	0	0
501.2	TRUE	Empty	DNA-directed DNA polymerase OS=Komagataella phaffii (strain GS115 / ATCC 20864) OX=644223 GN=PAS_chr3_0703 PE=4 SV=1	C4R5B8_KOMPG (+1)	116 kDa	TRUE		unknown	1	0	0	0	1	2	0	0	0	0	0	0
502	TRUE	Empty	Cluster of BA75_04071T0 OS=Komagataella pastoris OX=4922 GN=POP1 PE=4 SV=1 (A0A1B2JEA9_PICPA)	A0A1B2JEA9_PICPA	96 kDa	TRUE		unknown	0	0	1	1	2	0	0	0	0	1	0	0
502.1	TRUE	Empty	BA75_04071T0 OS=Komagataella pastoris OX=4922 GN=POP1 PE=4 SV=1	A0A1B2JEA9_PICPA	96 kDa	TRUE		unknown	0	0	1	1	2	0	0	0	0	1	0	0
502.2	TRUE	Empty	Subunit of both RNase MRP, which cleaves pre-rRNA, and nuclear RNase P OS=Komagataella phaffii (strain GS115 / ATCC 20864) OX=644223 GN=PAS_chr1-4_0517 PE=4 SV=1	C4QYP5_KOMPG (+1)	96 kDa	TRUE		unknown	0	0	0	1	2	0	0	0	0	1	0	0
503	TRUE	Empty	Cluster of BRO1 domain-containing protein OS=Komagataella phaffii (strain GS115 / ATCC 20864) OX=644223 GN=PAS_chr3_1161 PE=4 SV=1 (C4R3V2_KOMPG)	C4R3V2_KOMPG	95 kDa	TRUE		unknown	0	0	0	0	1	0	0	0	1	2	1	0
503.1	TRUE	Empty	BRO1 domain-containing protein OS=Komagataella phaffii (strain GS115 / ATCC 20864) OX=644223 GN=PAS_chr3_1161 PE=4 SV=1	C4R3V2_KOMPG	95 kDa	TRUE		unknown	0	0	0	0	0	0	0	0	1	2	1	0
503.2	TRUE	Empty	BA75_00208T0 OS=Komagataella pastoris OX=4922 GN=ATY40_BA7500208 PE=4 SV=1	A0A1B2J7I6_PICPA	89 kDa	TRUE		unknown	0	0	0	0	1	0	0	0	1	0	1	0
504	TRUE	Empty	Cluster of Mtm1-like protein OS=Komagataella pastoris OX=4922 PE=3 SV=1 (I6LAC5_PICPA)	I6LAC5_PICPA	68 kDa	TRUE		unknown	1	0	0	0	2	0	0	0	0	0	0	0
504.1	TRUE	Empty	Mtm1-like protein OS=Komagataella pastoris OX=4922 PE=3 SV=1	I6LAC5_PICPA	68 kDa	TRUE		unknown	1	0	0	0	1	0	0	0	0	0	0	0
504.2	TRUE	Empty	Phosphatidylinositol 3-phosphate [PI(3)P] phosphatase OS=Komagataella phaffii (strain GS115 / ATCC 20864) OX=644223 GN=PAS_chr3_0354 PE=3 SV=1	C4R4B0_KOMPG	62 kDa	TRUE		unknown	1	0	0	0	2	0	0	0	0	0	0	0
504.3	TRUE	Empty	BA75_00375T0 OS=Komagataella pastoris OX=4922 GN=ATY40_BA7500375 PE=3 SV=1	A0A1B2J550_PICPA	70 kDa	TRUE		unknown	0	0	0	0	1	0	0	0	0	0	0	0
505	TRUE	Empty	Cluster of Uncharacterized protein OS=Komagataella phaffii (strain GS115 / ATCC 20864) OX=644223 GN=PAS_chr1-3_0200 PE=4 SV=1 (C4QVJ0_KOMPG)	C4QVJ0_KOMPG	36 kDa	TRUE		unknown	0	0	1	0	0	6	0	0	0	1	1	0
505.1	TRUE	Empty	Uncharacterized protein OS=Komagataella phaffii (strain GS115 / ATCC 20864) OX=644223 GN=PAS_chr1-3_0200 PE=4 SV=1	C4QVJ0_KOMPG (+1)	36 kDa	TRUE		unknown	0	0	1	0	0	6	0	0	0	1	1	0
505.2	TRUE	Empty	BA75_01655T0 OS=Komagataella pastoris OX=4922 GN=ATY40_BA7501655 PE=4 SV=1	A0A1B2J6G3_PICPA	36 kDa	TRUE		unknown	0	0	1	0	0	6	0	0	0	1	1	0
506	TRUE	Empty	tr|A0A1B2JHV0|A0A1B2JHV0_PICPA-DECOY	tr|A0A1B2JHV0|A0A1B2JHV0_PICPA-DECOY	?			unknown	0	0	2	1	2	2	0	0	0	2	0	0
507	TRUE	Empty	tr|C4R5S6|C4R5S6_KOMPG-DECOY	tr|C4R5S6|C4R5S6_KOMPG-DECOY (+1)	?	TRUE		unknown	1	0	1	0	1	2	0	0	0	1	0	0
508	TRUE	Empty	Cluster of tr|A0A1B2JAP2|A0A1B2JAP2_PICPA-DECOY	tr|A0A1B2JAP2|A0A1B2JAP2_PICPA-DECOY [2]	?	TRUE		unknown	0	0	2	1	1	1	0	0	1	1	0	0
508.1	TRUE	Empty	tr|A0A1B2JAP2|A0A1B2JAP2_PICPA-DECOY	tr|A0A1B2JAP2|A0A1B2JAP2_PICPA-DECOY	?	TRUE		unknown	0	0	0	1	1	1	0	0	1	1	0	0
508.2	TRUE	Empty	tr|C4R7I2|C4R7I2_KOMPG-DECOY	tr|C4R7I2|C4R7I2_KOMPG-DECOY (+1)	?	TRUE		unknown	0	0	2	1	0	0	0	0	0	1	0	0
509	TRUE	Empty	Cluster of Replication factor C subunit 1 OS=Komagataella pastoris OX=4922 GN=RFC1 PE=3 SV=1 (A0A1B2J667_PICPA)	A0A1B2J667_PICPA	100 kDa	TRUE		unknown	0	0	1	0	1	1	0	0	1	2	1	0
509.1	TRUE	Empty	Replication factor C subunit 1 OS=Komagataella pastoris OX=4922 GN=RFC1 PE=3 SV=1	A0A1B2J667_PICPA	100 kDa	TRUE		unknown	0	0	1	0	1	1	0	0	1	1	0	0
509.2	TRUE	Empty	Replication factor C subunit 1 OS=Komagataella phaffii (strain GS115 / ATCC 20864) OX=644223 GN=PAS_chr1-4_0269 PE=3 SV=1	C4QXY0_KOMPG (+1)	100 kDa	TRUE		unknown	0	0	1	0	0	0	0	0	0	1	1	0
510	TRUE	Empty	Cluster of tr|C4QYI5|C4QYI5_KOMPG-DECOY	tr|C4QYI5|C4QYI5_KOMPG-DECOY	?	TRUE		unknown	1	0	1	0	2	0	0	0	1	2	1	0
510.1	TRUE	Empty	tr|C4QYI5|C4QYI5_KOMPG-DECOY	tr|C4QYI5|C4QYI5_KOMPG-DECOY (+1)	?	TRUE		unknown	1	0	1	0	2	0	0	0	1	1	1	0
510.2	TRUE	Empty	tr|A0A1B2JF98|A0A1B2JF98_PICPA-DECOY	tr|A0A1B2JF98|A0A1B2JF98_PICPA-DECOY	?	TRUE		unknown	1	0	0	0	2	0	0	0	0	2	1	0
511	TRUE	Empty	Cluster of tr|A0A1B2JCL3|A0A1B2JCL3_PICPA-DECOY	tr|A0A1B2JCL3|A0A1B2JCL3_PICPA-DECOY	?	TRUE		unknown	1	0	1	0	1	2	0	0	0	3	1	0
511.1	TRUE	Empty	tr|A0A1B2JCL3|A0A1B2JCL3_PICPA-DECOY	tr|A0A1B2JCL3|A0A1B2JCL3_PICPA-DECOY	?	TRUE		unknown	1	0	1	0	0	2	0	0	0	3	0	0
511.2	TRUE	Empty	tr|C4R2V0|C4R2V0_KOMPG-DECOY	tr|C4R2V0|C4R2V0_KOMPG-DECOY (+1)	?	TRUE		unknown	1	0	1	0	1	2	0	0	0	3	1	0
512	TRUE	Empty	Cluster of tr|A0A1B2JJ73|A0A1B2JJ73_PICPA-DECOY	tr|A0A1B2JJ73|A0A1B2JJ73_PICPA-DECOY	?	TRUE		unknown	1	0	1	0	3	0	0	0	0	1	0	0
512.1	TRUE	Empty	tr|A0A1B2JJ73|A0A1B2JJ73_PICPA-DECOY	tr|A0A1B2JJ73|A0A1B2JJ73_PICPA-DECOY	?	TRUE		unknown	1	0	1	0	1	0	0	0	0	1	0	0
512.2	TRUE	Empty	tr|C4R7W7|C4R7W7_KOMPG-DECOY	tr|C4R7W7|C4R7W7_KOMPG-DECOY (+1)	?	TRUE		unknown	1	0	0	0	2	0	0	0	0	1	0	0
513	TRUE	Empty	Cluster of Protein that forms heterodimers with Msh3p and Msh6p OS=Komagataella phaffii (strain GS115 / ATCC 20864) OX=644223 GN=PAS_chr1-4_0634 PE=3 SV=1 (C4QZ21_KOMPG)	C4QZ21_KOMPG [2]	104 kDa	TRUE		unknown	1	0	0	0	1	0	0	0	3	3	0	0
513.1	TRUE	Empty	Protein that forms heterodimers with Msh3p and Msh6p OS=Komagataella phaffii (strain GS115 / ATCC 20864) OX=644223 GN=PAS_chr1-4_0634 PE=3 SV=1	C4QZ21_KOMPG (+1)	104 kDa	TRUE		unknown	1	0	0	0	1	0	0	0	3	3	0	0
513.2	TRUE	Empty	BA75_04204T0 OS=Komagataella pastoris OX=4922 GN=MSH2 PE=3 SV=1	A0A1B2JES1_PICPA	104 kDa	TRUE		unknown	0	0	0	0	0	0	0	0	3	1	0	0
514	TRUE	Empty	Cluster of Phospholipid-transporting ATPase OS=Komagataella pastoris OX=4922 GN=DRS2 PE=3 SV=1 (A0A1B2JHL5_PICPA)	A0A1B2JHL5_PICPA [3]	144 kDa	TRUE		unknown	2	0	0	0	3	0	0	0	1	2	0	0
514.1	TRUE	Empty	Phospholipid-transporting ATPase OS=Komagataella pastoris OX=4922 GN=DRS2 PE=3 SV=1	A0A1B2JHL5_PICPA	144 kDa	TRUE		unknown	1	0	0	0	3	0	0	0	1	0	0	0
514.2	TRUE	Empty	Phospholipid-transporting ATPase OS=Komagataella phaffii (strain GS115 / ATCC 20864) OX=644223 GN=PAS_chr4_0662 PE=3 SV=1	C4R8J5_KOMPG (+1)	143 kDa	TRUE		unknown	2	0	0	0	0	0	0	0	1	2	0	0
515	TRUE	Empty	Cluster of ATP binding cassette family member OS=Komagataella phaffii (strain GS115 / ATCC 20864) OX=644223 GN=PAS_chr3_0728 PE=3 SV=1 (C4R5E1_KOMPG)	C4R5E1_KOMPG [2]	128 kDa	TRUE		unknown	2	0	0	0	0	1	0	0	1	4	0	0
515.1	TRUE	Empty	ATP binding cassette family member OS=Komagataella phaffii (strain GS115 / ATCC 20864) OX=644223 GN=PAS_chr3_0728 PE=3 SV=1	C4R5E1_KOMPG	128 kDa	TRUE		unknown	1	0	0	0	0	1	0	0	1	3	0	0
515.2	TRUE	Empty	BA75_03815T0 OS=Komagataella pastoris OX=4922 GN=NEW1 PE=3 SV=1	A0A1B2JFP6_PICPA	128 kDa	TRUE		unknown	2	0	0	0	0	1	0	0	1	2	0	0
515.3	TRUE	Empty	ATP binding cassette protein OS=Komagataella phaffii (strain ATCC 76273 / CBS 7435 / CECT 11047 / NRRL Y-11430 / Wegner 21-1) OX=981350 GN=NEW1 PE=3 SV=1	F2QVK1_KOMPC	83 kDa	TRUE		unknown	0	0	0	0	0	1	0	0	0	1	0	0
516	TRUE	Empty	Cluster of AdoMet-dependent rRNA methyltransferase SPB1 OS=Komagataella pastoris OX=4922 GN=SPB1 PE=3 SV=1 (A0A1B2JI21_PICPA)	A0A1B2JI21_PICPA	95 kDa	TRUE		unknown	0	0	0	0	1	2	0	1	1	1	0	0
516.1	TRUE	Empty	AdoMet-dependent rRNA methyltransferase SPB1 OS=Komagataella pastoris OX=4922 GN=SPB1 PE=3 SV=1	A0A1B2JI21_PICPA	95 kDa	TRUE		unknown	0	0	0	0	1	2	0	1	1	1	0	0
516.2	TRUE	Empty	AdoMet-dependent rRNA methyltransferase SPB1 OS=Komagataella phaffii (strain GS115 / ATCC 20864) OX=644223 GN=SPB1 PE=3 SV=1	C4R7Z2_KOMPG (+1)	95 kDa	TRUE		unknown	0	0	0	0	1	2	0	1	1	1	0	0
517	TRUE	Empty	Cluster of Serine/threonine-protein phosphatase OS=Komagataella phaffii (strain GS115 / ATCC 20864) OX=644223 GN=PAS_chr3_0414 PE=3 SV=1 (C4R4H7_KOMPG)	C4R4H7_KOMPG	66 kDa	TRUE		unknown	2	0	0	0	1	0	0	0	0	2	0	0
517.1	TRUE	Empty	Serine/threonine-protein phosphatase OS=Komagataella phaffii (strain GS115 / ATCC 20864) OX=644223 GN=PAS_chr3_0414 PE=3 SV=1	C4R4H7_KOMPG	66 kDa	TRUE		unknown	1	0	0	0	1	0	0	0	0	1	0	0
517.2	TRUE	Empty	Serine/threonine-protein phosphatase OS=Komagataella pastoris OX=4922 GN=CNA1 PE=3 SV=1	A0A1B2J8B4_PICPA	66 kDa	TRUE		unknown	1	0	0	0	1	0	0	0	0	1	0	0
518	TRUE	Empty	Cluster of BA75_04824T0 OS=Komagataella pastoris OX=4922 GN=NOP14 PE=3 SV=1 (A0A1B2JHF4_PICPA)	A0A1B2JHF4_PICPA	94 kDa	TRUE		unknown	2	0	0	0	3	1	0	0	0	2	0	0
518.1	TRUE	Empty	BA75_04824T0 OS=Komagataella pastoris OX=4922 GN=NOP14 PE=3 SV=1	A0A1B2JHF4_PICPA	94 kDa	TRUE		unknown	2	0	0	0	3	1	0	0	0	2	0	0
518.2	TRUE	Empty	Nucleolar protein, forms a complex with Noc4p OS=Komagataella phaffii (strain GS115 / ATCC 20864) OX=644223 GN=PAS_chr4_0512 PE=3 SV=1	C4R842_KOMPG (+1)	95 kDa	TRUE		unknown	0	0	0	0	3	1	0	0	0	1	0	0
519	TRUE	Empty	Cluster of BA75_02850T0 OS=Komagataella pastoris OX=4922 GN=ATY40_BA7502850 PE=3 SV=1 (A0A1B2JC44_PICPA)	A0A1B2JC44_PICPA	82 kDa	TRUE		unknown	1	0	0	0	0	1	0	0	0	2	0	0
519.1	TRUE	Empty	BA75_02850T0 OS=Komagataella pastoris OX=4922 GN=ATY40_BA7502850 PE=3 SV=1	A0A1B2JC44_PICPA	82 kDa	TRUE		unknown	0	0	0	0	0	1	0	0	0	0	0	0
519.2	TRUE	Empty	Microtubule bundling protein OS=Komagataella phaffii (strain ATCC 76273 / CBS 7435 / CECT 11047 / NRRL Y-11430 / Wegner 21-1) OX=981350 GN=ASE1 PE=3 SV=1	F2QTC0_KOMPC	82 kDa	TRUE		unknown	1	0	0	0	0	0	0	0	0	2	0	0
519.3	TRUE	Empty	Mitotic spindle midzone localized microtubule-associated protein (MAP) family member OS=Komagataella phaffii (strain GS115 / ATCC 20864) OX=644223 GN=PAS_chr2-1_0331 PE=3 SV=1	C4R0C6_KOMPG	60 kDa	TRUE		unknown	1	0	0	0	0	0	0	0	0	2	0	0
520	TRUE	Empty	Cluster of Ketopantoate reductase C-terminal domain-containing protein OS=Komagataella phaffii (strain GS115 / ATCC 20864) OX=644223 GN=PAS_chr1-3_0173 PE=4 SV=1 (C4QVG3_KOMPG)	C4QVG3_KOMPG [3]	91 kDa	TRUE		unknown	0	0	0	0	4	4	0	0	0	1	0	0
520.1	TRUE	Empty	Ketopantoate reductase C-terminal domain-containing protein OS=Komagataella phaffii (strain GS115 / ATCC 20864) OX=644223 GN=PAS_chr1-3_0173 PE=4 SV=1	C4QVG3_KOMPG (+1)	91 kDa	TRUE		unknown	0	0	0	0	3	3	0	0	0	1	0	0
520.2	TRUE	Empty	BA75_01685T0 OS=Komagataella pastoris OX=4922 GN=ATY40_BA7501685 PE=4 SV=1	A0A1B2J948_PICPA	91 kDa	TRUE		unknown	0	0	0	0	2	4	0	0	0	1	0	0
521	TRUE	Empty	tr|A0A1B2J8D3|A0A1B2J8D3_PICPA-DECOY	tr|A0A1B2J8D3|A0A1B2J8D3_PICPA-DECOY	?	TRUE		unknown	1	0	0	0	0	4	0	1	1	3	0	0
522	TRUE	Empty	tr|C4R6U0|C4R6U0_KOMPG-DECOY	tr|C4R6U0|C4R6U0_KOMPG-DECOY (+1)	?	TRUE		unknown	0	0	3	0	0	0	0	0	1	3	0	0
523	TRUE	Empty	tr|C4QY98|C4QY98_KOMPG-DECOY	tr|C4QY98|C4QY98_KOMPG-DECOY (+1)	?	TRUE		unknown	2	0	0	0	2	0	0	1	0	0	0	0
524	TRUE	Empty	Cluster of sp|Q9HFR4|ATG2_PICPA-DECOY	sp|Q9HFR4|ATG2_PICPA-DECOY	?	TRUE		unknown	0	0	1	0	5	1	0	0	2	1	1	0
524.1	TRUE	Empty	sp|Q9HFR4|ATG2_PICPA-DECOY	sp|Q9HFR4|ATG2_PICPA-DECOY	?	TRUE		unknown	0	0	1	0	5	1	0	0	2	1	1	0
524.2	TRUE	Empty	tr|C4QVF7|C4QVF7_KOMPG-DECOY	tr|C4QVF7|C4QVF7_KOMPG-DECOY (+1)	?	TRUE		unknown	0	0	1	0	5	1	0	0	2	1	1	0
525	TRUE	Empty	Cluster of sp|Q9Y7B1|ACOX_PICPA-DECOY	sp|Q9Y7B1|ACOX_PICPA-DECOY [2]	?	TRUE		unknown	1	0	1	0	3	1	0	0	1	0	2	0
525.1	TRUE	Empty	sp|Q9Y7B1|ACOX_PICPA-DECOY	sp|Q9Y7B1|ACOX_PICPA-DECOY	?	TRUE		unknown	0	0	1	0	3	1	0	0	0	0	1	0
525.2	TRUE	Empty	tr|A0A1B2JE30|A0A1B2JE30_PICPA-DECOY	tr|A0A1B2JE30|A0A1B2JE30_PICPA-DECOY	?	TRUE		unknown	1	0	0	0	1	0	0	0	1	0	1	0
525.3	TRUE	Empty	tr|C4QYR9|C4QYR9_KOMPG-DECOY	tr|C4QYR9|C4QYR9_KOMPG-DECOY (+1)	?	TRUE		unknown	0	0	1	0	3	1	0	0	0	0	2	0
526	TRUE	Empty	Cluster of tr|C4R5Q1|C4R5Q1_KOMPG-DECOY	tr|C4R5Q1|C4R5Q1_KOMPG-DECOY [2]	?	TRUE		unknown	0	0	1	0	1	1	0	0	1	2	0	0
526.1	TRUE	Empty	tr|C4R5Q1|C4R5Q1_KOMPG-DECOY	tr|C4R5Q1|C4R5Q1_KOMPG-DECOY (+1)	?	TRUE		unknown	0	0	1	0	1	1	0	0	1	2	0	0
526.2	TRUE	Empty	tr|A0A1B2JGN5|A0A1B2JGN5_PICPA-DECOY	tr|A0A1B2JGN5|A0A1B2JGN5_PICPA-DECOY	?	TRUE		unknown	0	0	0	0	1	1	0	0	0	2	0	0
527	TRUE	Empty	Cluster of Yeast longin domain-containing protein OS=Komagataella phaffii (strain GS115 / ATCC 20864) OX=644223 GN=PAS_chr1-4_0666 PE=4 SV=1 (C4QY02_KOMPG)	C4QY02_KOMPG [2]	106 kDa	TRUE		unknown	0	0	1	0	2	2	0	0	1	0	1	0
527.1	TRUE	Empty	Yeast longin domain-containing protein OS=Komagataella phaffii (strain GS115 / ATCC 20864) OX=644223 GN=PAS_chr1-4_0666 PE=4 SV=1	C4QY02_KOMPG (+1)	106 kDa	TRUE		unknown	0	0	1	0	2	2	0	0	1	0	1	0
527.2	TRUE	Empty	BA75_00775T0 OS=Komagataella pastoris OX=4922 GN=ATY40_BA7500775 PE=4 SV=1	A0A1B2J5E6_PICPA	106 kDa	TRUE		unknown	0	0	0	0	0	0	0	0	1	0	1	0
528	TRUE	Empty	Cluster of Actin-and formin-interacting protein, involved in actin cable nucleation and polarized cell growth OS=Komagataella phaffii (strain GS115 / ATCC 20864) OX=644223 GN=PAS_chr2-1_0372 PE=4 SV=1 (C4R0G9_KOMPG)	C4R0G9_KOMPG [2]	80 kDa	TRUE		unknown	0	0	1	1	0	2	0	0	2	1	0	0
528.1	TRUE	Empty	Actin-and formin-interacting protein, involved in actin cable nucleation and polarized cell growth OS=Komagataella phaffii (strain GS115 / ATCC 20864) OX=644223 GN=PAS_chr2-1_0372 PE=4 SV=1	C4R0G9_KOMPG	80 kDa	TRUE		unknown	0	0	0	1	0	1	0	0	2	1	0	0
528.2	TRUE	Empty	BA75_02812T0 OS=Komagataella pastoris OX=4922 GN=BUD6 PE=4 SV=1	A0A1B2JAM0_PICPA	78 kDa	TRUE		unknown	0	0	1	1	0	2	0	0	1	1	0	0
529	TRUE	Empty	Cluster of Putative transcription factor OS=Komagataella phaffii (strain ATCC 76273 / CBS 7435 / CECT 11047 / NRRL Y-11430 / Wegner 21-1) OX=981350 GN=NS.02029 PE=4 SV=1 (A0A1G4KQG8_KOMPC)	A0A1G4KQG8_KOMPC [3]	99 kDa	TRUE		unknown	0	0	0	1	2	1	0	0	0	2	0	0
529.1	TRUE	Empty	Putative transcription factor OS=Komagataella phaffii (strain ATCC 76273 / CBS 7435 / CECT 11047 / NRRL Y-11430 / Wegner 21-1) OX=981350 GN=NS.02029 PE=4 SV=1	A0A1G4KQG8_KOMPC (+1)	99 kDa	TRUE		unknown	0	0	0	1	1	1	0	0	0	2	0	0
529.2	TRUE	Empty	BA75_00464T0 OS=Komagataella pastoris OX=4922 GN=ATY40_BA7500464 PE=4 SV=1	A0A1B2J6P8_PICPA	99 kDa	TRUE		unknown	0	0	0	1	2	1	0	0	0	1	0	0
530	TRUE	Empty	Cluster of Phosphotransferase OS=Komagataella phaffii (strain GS115 / ATCC 20864) OX=644223 GN=PAS_chr1-4_0561 PE=3 SV=1 (C4QYU3_KOMPG)	C4QYU3_KOMPG [3]	55 kDa	TRUE		unknown	1	15	0	0	1	0	4	5	0	7	9	3
530.1	TRUE	Empty	Phosphotransferase OS=Komagataella phaffii (strain GS115 / ATCC 20864) OX=644223 GN=PAS_chr1-4_0561 PE=3 SV=1	C4QYU3_KOMPG (+1)	55 kDa	TRUE		unknown	1	15	0	0	1	0	4	5	0	6	9	3
530.2	TRUE	Empty	Phosphotransferase OS=Komagataella pastoris OX=4922 GN=ATY40_BA7504121 PE=3 SV=1	A0A1B2JFF8_PICPA	55 kDa	TRUE		unknown	1	12	0	0	1	0	4	5	0	7	9	3
531	TRUE	Empty	Cluster of Ubiquitin carboxyl-terminal hydrolase 12 OS=Komagataella phaffii (strain ATCC 76273 / CBS 7435 / CECT 11047 / NRRL Y-11430 / Wegner 21-1) OX=981350 GN=UBP12 PE=4 SV=1 (F2QVY0_KOMPC)	F2QVY0_KOMPC	138 kDa	TRUE		unknown	2	0	0	0	0	0	0	0	0	2	0	0
531.1	TRUE	Empty	Ubiquitin carboxyl-terminal hydrolase 12 OS=Komagataella phaffii (strain ATCC 76273 / CBS 7435 / CECT 11047 / NRRL Y-11430 / Wegner 21-1) OX=981350 GN=UBP12 PE=4 SV=1	F2QVY0_KOMPC	138 kDa	TRUE		unknown	2	0	0	0	0	0	0	0	0	2	0	0
531.2	TRUE	Empty	Ubiquitin carboxyl-terminal hydrolase OS=Komagataella phaffii (strain GS115 / ATCC 20864) OX=644223 GN=PAS_chr3_0605 PE=4 SV=1	C4R516_KOMPG	132 kDa	TRUE		unknown	2	0	0	0	0	0	0	0	0	2	0	0
532	TRUE	Empty	Cluster of tr|C4R7X3|C4R7X3_KOMPG-DECOY	tr|C4R7X3|C4R7X3_KOMPG-DECOY [2]	?	TRUE		unknown	0	0	0	0	2	4	0	0	0	0	0	0
532.1	TRUE	Empty	tr|C4R7X3|C4R7X3_KOMPG-DECOY	tr|C4R7X3|C4R7X3_KOMPG-DECOY (+1)	?	TRUE		unknown	0	0	0	0	2	4	0	0	0	0	0	0
532.2	TRUE	Empty	tr|A0A1B2JH40|A0A1B2JH40_PICPA-DECOY	tr|A0A1B2JH40|A0A1B2JH40_PICPA-DECOY	?	TRUE		unknown	0	0	0	0	2	3	0	0	0	0	0	0
533	TRUE	Empty	Cluster of tr|A0A1G4KQL3|A0A1G4KQL3_KOMPC-DECOY	tr|A0A1G4KQL3|A0A1G4KQL3_KOMPC-DECOY	?	TRUE		unknown	1	0	0	0	0	6	0	1	0	2	0	0
533.1	TRUE	Empty	tr|A0A1G4KQL3|A0A1G4KQL3_KOMPC-DECOY	tr|A0A1G4KQL3|A0A1G4KQL3_KOMPC-DECOY	?	TRUE		unknown	1	0	0	0	0	6	0	1	0	2	0	0
533.2	TRUE	Empty	tr|A0A1B2J5R7|A0A1B2J5R7_PICPA-DECOY	tr|A0A1B2J5R7|A0A1B2J5R7_PICPA-DECOY	?	TRUE		unknown	0	0	0	0	0	1	0	1	0	2	0	0
534	TRUE	Empty	Cluster of Translation initiation factor eIF4A OS=Komagataella phaffii (strain ATCC 76273 / CBS 7435 / CECT 11047 / NRRL Y-11430 / Wegner 21-1) OX=981350 GN=TIF2 PE=3 SV=1 (F2QVZ0_KOMPC)	F2QVZ0_KOMPC	54 kDa	TRUE		unknown	0	8	0	1	1	0	11	4	0	0	5	16
534.1	TRUE	Empty	Translation initiation factor eIF4A OS=Komagataella phaffii (strain ATCC 76273 / CBS 7435 / CECT 11047 / NRRL Y-11430 / Wegner 21-1) OX=981350 GN=TIF2 PE=3 SV=1	F2QVZ0_KOMPC	54 kDa	TRUE		unknown	0	8	0	1	1	0	11	4	0	0	5	16
534.2	TRUE	Empty	BA75_00634T0 OS=Komagataella pastoris OX=4922 GN=TIF1 PE=3 SV=1	A0A1B2J823_PICPA	45 kDa	TRUE		unknown	0	7	0	1	1	0	10	3	0	0	5	15
535	TRUE	Empty	BA75_02116T0 OS=Komagataella pastoris OX=4922 GN=AXL1 PE=4 SV=1	A0A1B2JA82_PICPA	128 kDa	TRUE		unknown	1	0	1	0	1	0	0	0	1	1	2	0
536	TRUE	Empty	tr|C4R144|C4R144_KOMPG-DECOY	tr|C4R144|C4R144_KOMPG-DECOY (+1)	?	TRUE		unknown	1	0	0	0	3	1	0	1	0	1	2	0
537	TRUE	Empty	BA75_03003T0 OS=Komagataella pastoris OX=4922 GN=ATY40_BA7503003 PE=4 SV=1	A0A1B2JAL8_PICPA	115 kDa	TRUE		unknown	0	0	1	2	1	1	0	1	1	0	0	0
538	TRUE	Empty	Cluster of BA75_04425T0 OS=Komagataella pastoris OX=4922 GN=ATY40_BA7504425 PE=3 SV=1 (A0A1B2JHF5_PICPA)	A0A1B2JHF5_PICPA [2]	118 kDa	TRUE		unknown	1	0	2	1	3	0	0	0	0	3	0	0
538.1	TRUE	Empty	BA75_04425T0 OS=Komagataella pastoris OX=4922 GN=ATY40_BA7504425 PE=3 SV=1	A0A1B2JHF5_PICPA (+1)	118 kDa	TRUE		unknown	0	0	2	1	3	0	0	0	0	3	0	0
538.2	TRUE	Empty	Transmembrane actin-binding protein involved in membrane cytoskeleton assembly and cell polarization OS=Komagataella phaffii (strain GS115 / ATCC 20864) OX=644223 GN=PAS_chr4_0879 PE=3 SV=1	C4R975_KOMPG (+2)	118 kDa	TRUE		unknown	1	0	2	0	2	0	0	0	0	3	0	0
539	TRUE	Empty	Cluster of Alanine--tRNA ligase OS=Komagataella pastoris OX=4922 GN=ALA1 PE=3 SV=1 (A0A1B2J923_PICPA)	A0A1B2J923_PICPA [2]	109 kDa	TRUE		unknown	0	0	1	1	4	1	0	0	0	0	0	0
539.1	TRUE	Empty	Alanine--tRNA ligase OS=Komagataella pastoris OX=4922 GN=ALA1 PE=3 SV=1	A0A1B2J923_PICPA	109 kDa	TRUE		unknown	0	0	1	0	3	1	0	0	0	0	0	0
539.2	TRUE	Empty	Alanine--tRNA ligase OS=Komagataella phaffii (strain ATCC 76273 / CBS 7435 / CECT 11047 / NRRL Y-11430 / Wegner 21-1) OX=981350 GN=ALA1 PE=3 SV=1	F2QWC2_KOMPC	107 kDa	TRUE		unknown	0	0	1	1	2	0	0	0	0	0	0	0
539.3	TRUE	Empty	Alanine--tRNA ligase OS=Komagataella phaffii (strain GS115 / ATCC 20864) OX=644223 GN=ALA1 PE=3 SV=1	C4R4M5_KOMPG	109 kDa	TRUE		unknown	0	0	0	0	0	0	0	0	0	0	0	0
540	TRUE	Empty	Cluster of Putative lipase OS=Komagataella phaffii (strain ATCC 76273 / CBS 7435 / CECT 11047 / NRRL Y-11430 / Wegner 21-1) OX=981350 GN=MIL1 PE=3 SV=1 (F2QXA6_KOMPC)	F2QXA6_KOMPC [2]	122 kDa	TRUE		unknown	2	0	0	1	1	0	0	0	1	3	0	0
540.1	TRUE	Empty	Putative lipase OS=Komagataella phaffii (strain ATCC 76273 / CBS 7435 / CECT 11047 / NRRL Y-11430 / Wegner 21-1) OX=981350 GN=MIL1 PE=3 SV=1	F2QXA6_KOMPC	122 kDa	TRUE		unknown	2	0	0	1	1	0	0	0	1	2	0	0
540.2	TRUE	Empty	BA75_00138T0 OS=Komagataella pastoris OX=4922 GN=YFL034W PE=3 SV=1	A0A1B2J7S9_PICPA	123 kDa	TRUE		unknown	1	0	0	1	1	0	0	0	0	2	0	0
541	TRUE	Empty	Cluster of tr|A0A1B2JCB8|A0A1B2JCB8_PICPA-DECOY	tr|A0A1B2JCB8|A0A1B2JCB8_PICPA-DECOY	?	TRUE		unknown	2	0	1	0	2	0	0	0	1	2	1	0
541.1	TRUE	Empty	tr|A0A1B2JCB8|A0A1B2JCB8_PICPA-DECOY	tr|A0A1B2JCB8|A0A1B2JCB8_PICPA-DECOY	?	TRUE		unknown	2	0	1	0	2	0	0	0	1	2	1	0
541.2	TRUE	Empty	tr|C4R284|C4R284_KOMPG-DECOY	tr|C4R284|C4R284_KOMPG-DECOY (+1)	?	TRUE		unknown	1	0	1	0	1	0	0	0	1	1	0	0
542	TRUE	Empty	Cluster of tr|A0A1B2J718|A0A1B2J718_PICPA-DECOY	tr|A0A1B2J718|A0A1B2J718_PICPA-DECOY	?	TRUE		unknown	1	0	0	1	2	1	0	0	0	1	0	0
542.1	TRUE	Empty	tr|A0A1B2J718|A0A1B2J718_PICPA-DECOY	tr|A0A1B2J718|A0A1B2J718_PICPA-DECOY	?	TRUE		unknown	1	0	0	1	2	1	0	0	0	1	0	0
542.2	TRUE	Empty	tr|C4R493|C4R493_KOMPG-DECOY	tr|C4R493|C4R493_KOMPG-DECOY (+1)	?	TRUE		unknown	1	0	0	0	2	1	0	0	0	1	0	0
543	TRUE	Empty	Cluster of leucine--tRNA ligase OS=Komagataella phaffii (strain GS115 / ATCC 20864) OX=644223 GN=PAS_chr4_0393 PE=4 SV=1 (C4R7R8_KOMPG)	C4R7R8_KOMPG [3]	125 kDa	TRUE		unknown	0	0	0	1	0	1	0	0	0	3	0	0
543.1	TRUE	Empty	leucine--tRNA ligase OS=Komagataella phaffii (strain GS115 / ATCC 20864) OX=644223 GN=PAS_chr4_0393 PE=4 SV=1	C4R7R8_KOMPG (+1)	125 kDa	TRUE		unknown	0	0	0	1	0	1	0	0	0	2	0	0
543.2	TRUE	Empty	leucine--tRNA ligase OS=Komagataella pastoris OX=4922 GN=CDC60 PE=4 SV=1	A0A1B2JBY2_PICPA	125 kDa	TRUE		unknown	0	0	0	1	0	1	0	0	0	3	0	0
544	TRUE	Empty	Cluster of tr|A0A1B2JAT3|A0A1B2JAT3_PICPA-DECOY	tr|A0A1B2JAT3|A0A1B2JAT3_PICPA-DECOY [2]	?	TRUE		unknown	0	0	0	1	0	2	0	1	2	3	1	0
544.1	TRUE	Empty	tr|A0A1B2JAT3|A0A1B2JAT3_PICPA-DECOY	tr|A0A1B2JAT3|A0A1B2JAT3_PICPA-DECOY	?	TRUE		unknown	0	0	0	1	0	2	0	1	2	2	1	0
544.2	TRUE	Empty	tr|C4R7E3|C4R7E3_KOMPG-DECOY	tr|C4R7E3|C4R7E3_KOMPG-DECOY	?	TRUE		unknown	0	0	0	0	0	2	0	0	2	3	1	0
544.3	TRUE	Empty	tr|A0A1G4KQW8|A0A1G4KQW8_KOMPC-DECOY	tr|A0A1G4KQW8|A0A1G4KQW8_KOMPC-DECOY	?	TRUE		unknown	0	0	0	0	0	2	0	0	2	2	1	0
545	TRUE	Empty	Cluster of DNA polymerase OS=Komagataella phaffii (strain GS115 / ATCC 20864) OX=644223 GN=PAS_chr3_0797 PE=3 SV=1 (C4R5L5_KOMPG)	C4R5L5_KOMPG [3]	65 kDa	TRUE		unknown	0	0	0	0	4	1	0	0	0	1	0	0
545.1	TRUE	Empty	DNA polymerase OS=Komagataella phaffii (strain GS115 / ATCC 20864) OX=644223 GN=PAS_chr3_0797 PE=3 SV=1	C4R5L5_KOMPG (+1)	65 kDa	TRUE		unknown	0	0	0	0	4	0	0	0	0	1	0	0
545.2	TRUE	Empty	DNA polymerase OS=Komagataella pastoris OX=4922 GN=POL4 PE=3 SV=1	A0A1B2JFY0_PICPA	65 kDa	TRUE		unknown	0	0	0	0	3	1	0	0	0	0	0	0
546	TRUE	Empty	Cluster of Uncharacterized protein OS=Komagataella phaffii (strain GS115 / ATCC 20864) OX=644223 GN=PAS_chr1-1_0336 PE=4 SV=1 (C4QWU0_KOMPG)	C4QWU0_KOMPG [2]	71 kDa	TRUE		unknown	1	0	1	0	0	3	0	0	0	4	0	0
546.1	TRUE	Empty	Uncharacterized protein OS=Komagataella phaffii (strain GS115 / ATCC 20864) OX=644223 GN=PAS_chr1-1_0336 PE=4 SV=1	C4QWU0_KOMPG (+1)	71 kDa	TRUE		unknown	1	0	1	0	0	3	0	0	0	4	0	0
546.2	TRUE	Empty	BA75_01200T0 OS=Komagataella pastoris OX=4922 GN=LCD1 PE=4 SV=1	A0A1B2J7W9_PICPA	71 kDa	TRUE		unknown	0	0	1	0	0	0	0	0	0	1	0	0
547	TRUE	Empty	Cluster of tr|A0A1B2JJC0|A0A1B2JJC0_PICPA-DECOY	tr|A0A1B2JJC0|A0A1B2JJC0_PICPA-DECOY	?	TRUE		unknown	0	0	0	0	2	0	0	0	0	0	0	0
547.1	TRUE	Empty	tr|A0A1B2JJC0|A0A1B2JJC0_PICPA-DECOY	tr|A0A1B2JJC0|A0A1B2JJC0_PICPA-DECOY	?	TRUE		unknown	0	0	0	0	2	0	0	0	0	0	0	0
547.2	TRUE	Empty	tr|C4R818|C4R818_KOMPG-DECOY	tr|C4R818|C4R818_KOMPG-DECOY (+2)	?	TRUE		unknown	0	0	0	0	1	0	0	0	0	0	0	0
548	TRUE	Empty	Cluster of tr|C4QZJ2|C4QZJ2_KOMPG-DECOY	tr|C4QZJ2|C4QZJ2_KOMPG-DECOY	?	TRUE		unknown	1	0	0	0	2	0	0	0	0	2	0	0
548.1	TRUE	Empty	tr|C4QZJ2|C4QZJ2_KOMPG-DECOY	tr|C4QZJ2|C4QZJ2_KOMPG-DECOY (+1)	?	TRUE		unknown	1	0	0	0	0	0	0	0	0	1	0	0
548.2	TRUE	Empty	tr|A0A1B2JJ50|A0A1B2JJ50_PICPA-DECOY	tr|A0A1B2JJ50|A0A1B2JJ50_PICPA-DECOY	?	TRUE		unknown	0	0	0	0	2	0	0	0	0	2	0	0
549	TRUE	Empty	Cluster of DNA polymerase OS=Komagataella pastoris OX=4922 GN=POL3 PE=3 SV=1 (A0A1B2JHZ7_PICPA)	A0A1B2JHZ7_PICPA	124 kDa	TRUE		unknown	0	0	1	0	3	0	0	0	0	2	0	0
549.1	TRUE	Empty	DNA polymerase OS=Komagataella pastoris OX=4922 GN=POL3 PE=3 SV=1	A0A1B2JHZ7_PICPA	124 kDa	TRUE		unknown	0	0	0	0	3	0	0	0	0	2	0	0
549.2	TRUE	Empty	DNA polymerase OS=Komagataella phaffii (strain GS115 / ATCC 20864) OX=644223 GN=PAS_chr2-1_0163 PE=3 SV=1	C4QZU5_KOMPG (+1)	124 kDa	TRUE		unknown	0	0	1	0	3	0	0	0	0	1	0	0
550	TRUE	Empty	Cluster of ATP-dependent RNA helicase DBP10 OS=Komagataella phaffii (strain GS115 / ATCC 20864) OX=644223 GN=PAS_chr1-4_0356 PE=3 SV=1 (C4QY76_KOMPG)	C4QY76_KOMPG [2]	111 kDa	TRUE		unknown	1	0	0	0	1	1	0	0	0	3	0	0
550.1	TRUE	Empty	ATP-dependent RNA helicase DBP10 OS=Komagataella phaffii (strain GS115 / ATCC 20864) OX=644223 GN=PAS_chr1-4_0356 PE=3 SV=1	C4QY76_KOMPG (+1)	111 kDa	TRUE		unknown	1	0	0	0	1	1	0	0	0	3	0	0
550.2	TRUE	Empty	ATP-dependent RNA helicase DBP10 OS=Komagataella pastoris OX=4922 GN=DBP10 PE=3 SV=1	A0A1B2J915_PICPA	111 kDa	TRUE		unknown	0	0	0	0	1	1	0	0	0	2	0	0
551	TRUE	Empty	Cluster of tr|A0A1B2JET7|A0A1B2JET7_PICPA-DECOY	tr|A0A1B2JET7|A0A1B2JET7_PICPA-DECOY	?	TRUE		unknown	1	0	0	0	3	0	0	0	0	3	0	0
551.1	TRUE	Empty	tr|A0A1B2JET7|A0A1B2JET7_PICPA-DECOY	tr|A0A1B2JET7|A0A1B2JET7_PICPA-DECOY	?	TRUE		unknown	1	0	0	0	3	0	0	0	0	3	0	0
551.2	TRUE	Empty	tr|C4R5L1|C4R5L1_KOMPG-DECOY	tr|C4R5L1|C4R5L1_KOMPG-DECOY (+1)	?	TRUE		unknown	1	0	0	0	2	0	0	0	0	1	0	0
552	TRUE	Empty	Cluster of tr|C4QW45|C4QW45_KOMPG-DECOY	tr|C4QW45|C4QW45_KOMPG-DECOY	?	TRUE		unknown	3	0	2	0	0	1	0	0	1	0	1	0
552.1	TRUE	Empty	tr|C4QW45|C4QW45_KOMPG-DECOY	tr|C4QW45|C4QW45_KOMPG-DECOY (+1)	?	TRUE		unknown	1	0	2	0	0	1	0	0	1	0	0	0
552.2	TRUE	Empty	tr|A0A1B2J6Q7|A0A1B2J6Q7_PICPA-DECOY	tr|A0A1B2J6Q7|A0A1B2J6Q7_PICPA-DECOY	?	TRUE		unknown	2	0	2	0	0	0	0	0	0	0	1	0
553	TRUE	Empty	Cluster of tr|C4R7Z2|C4R7Z2_KOMPG-DECOY	tr|C4R7Z2|C4R7Z2_KOMPG-DECOY [3]	?	TRUE		unknown	1	0	0	0	3	2	0	0	0	2	0	0
553.1	TRUE	Empty	tr|C4R7Z2|C4R7Z2_KOMPG-DECOY	tr|C4R7Z2|C4R7Z2_KOMPG-DECOY (+1)	?	TRUE		unknown	1	0	0	0	2	2	0	0	0	2	0	0
553.2	TRUE	Empty	tr|A0A1B2JI21|A0A1B2JI21_PICPA-DECOY	tr|A0A1B2JI21|A0A1B2JI21_PICPA-DECOY	?	TRUE		unknown	0	0	0	0	3	2	0	0	0	2	0	0
554	TRUE	Empty	tr|C4R2G0|C4R2G0_KOMPG-DECOY	tr|C4R2G0|C4R2G0_KOMPG-DECOY (+1)	?	TRUE		unknown	1	0	0	0	2	3	0	0	0	1	0	0
555	TRUE	Empty	Cluster of tr|Q9P4C9|Q9P4C9_PICPA-DECOY	tr|Q9P4C9|Q9P4C9_PICPA-DECOY	?	TRUE		unknown	0	0	2	1	3	2	0	0	0	2	0	0
555.1	TRUE	Empty	tr|Q9P4C9|Q9P4C9_PICPA-DECOY	tr|Q9P4C9|Q9P4C9_PICPA-DECOY	?	TRUE		unknown	0	0	2	1	3	2	0	0	0	2	0	0
555.2	TRUE	Empty	tr|A0A1B2J5E0|A0A1B2J5E0_PICPA-DECOY	tr|A0A1B2J5E0|A0A1B2J5E0_PICPA-DECOY	?	TRUE		unknown	0	0	2	1	1	2	0	0	0	2	0	0
556	TRUE	Empty	Cluster of ubiquitinyl hydrolase 1 OS=Komagataella pastoris OX=4922 GN=UBP2 PE=4 SV=1 (A0A1B2JA43_PICPA)	A0A1B2JA43_PICPA [3]	147 kDa	TRUE		unknown	2	0	1	0	1	0	0	0	1	3	3	0
556.1	TRUE	Empty	ubiquitinyl hydrolase 1 OS=Komagataella pastoris OX=4922 GN=UBP2 PE=4 SV=1	A0A1B2JA43_PICPA	147 kDa	TRUE		unknown	2	0	1	0	1	0	0	0	0	2	3	0
556.2	TRUE	Empty	ubiquitinyl hydrolase 1 OS=Komagataella phaffii (strain GS115 / ATCC 20864) OX=644223 GN=PAS_chr3_0117 PE=4 SV=1	C4R3L1_KOMPG (+1)	147 kDa	TRUE		unknown	0	0	0	0	1	0	0	0	1	2	0	0
557	TRUE	Empty	Cluster of NAD-specific glutamate dehydrogenase OS=Komagataella pastoris OX=4922 GN=ATY40_BA7502875 PE=3 SV=1 (A0A1B2JC36_PICPA)	A0A1B2JC36_PICPA [2]	118 kDa	TRUE		unknown	1	1	0	0	1	1	0	0	1	0	2	0
557.1	TRUE	Empty	NAD-specific glutamate dehydrogenase OS=Komagataella pastoris OX=4922 GN=ATY40_BA7502875 PE=3 SV=1	A0A1B2JC36_PICPA	118 kDa	TRUE		unknown	1	1	0	0	1	1	0	0	0	0	1	0
557.2	TRUE	Empty	NAD-specific glutamate dehydrogenase OS=Komagataella phaffii (strain GS115 / ATCC 20864) OX=644223 GN=PAS_chr2-1_0311 PE=3 SV=1	C4R0A2_KOMPG (+1)	118 kDa	TRUE		unknown	1	1	0	0	1	1	0	0	1	0	2	0
558	TRUE	Empty	Cluster of Plasma membrane ATP binding cassette (ABC) transporter OS=Komagataella phaffii (strain GS115 / ATCC 20864) OX=644223 GN=PAS_chr1-1_0398 PE=4 SV=1 (C4QX02_KOMPG)	C4QX02_KOMPG [2]	170 kDa	TRUE		unknown	1	0	0	0	1	1	0	0	1	4	1	0
558.1	TRUE	Empty	Plasma membrane ATP binding cassette (ABC) transporter OS=Komagataella phaffii (strain GS115 / ATCC 20864) OX=644223 GN=PAS_chr1-1_0398 PE=4 SV=1	C4QX02_KOMPG (+1)	170 kDa	TRUE		unknown	1	0	0	0	1	1	0	0	1	4	1	0
558.2	TRUE	Empty	BA75_01134T0 OS=Komagataella pastoris OX=4922 GN=PDR5 PE=4 SV=1	A0A1B2J6T4_PICPA	171 kDa	TRUE		unknown	0	0	0	0	0	0	0	0	1	2	1	0
559	TRUE	Empty	Cluster of Condensin complex subunit 1 OS=Komagataella pastoris OX=4922 GN=YCS4 PE=3 SV=1 (A0A1B2J7T8_PICPA)	A0A1B2J7T8_PICPA	130 kDa	TRUE		unknown	1	0	0	0	1	0	0	0	0	3	0	0
559.1	TRUE	Empty	Condensin complex subunit 1 OS=Komagataella pastoris OX=4922 GN=YCS4 PE=3 SV=1	A0A1B2J7T8_PICPA	130 kDa	TRUE		unknown	1	0	0	0	1	0	0	0	0	2	0	0
559.2	TRUE	Empty	Condensin complex subunit 1 OS=Komagataella phaffii (strain GS115 / ATCC 20864) OX=644223 GN=PAS_chr3_0265 PE=3 SV=1	C4R417_KOMPG	128 kDa	TRUE		unknown	1	0	0	0	1	0	0	0	0	1	0	0
560	TRUE	Empty	Cluster of tr|A0A1B2J7U2|A0A1B2J7U2_PICPA-DECOY	tr|A0A1B2J7U2|A0A1B2J7U2_PICPA-DECOY	?	TRUE		unknown	0	0	0	0	2	2	0	0	0	2	0	0
560.1	TRUE	Empty	tr|A0A1B2J7U2|A0A1B2J7U2_PICPA-DECOY	tr|A0A1B2J7U2|A0A1B2J7U2_PICPA-DECOY	?	TRUE		unknown	0	0	0	0	2	2	0	0	0	2	0	0
560.2	TRUE	Empty	tr|C4QY37|C4QY37_KOMPG-DECOY	tr|C4QY37|C4QY37_KOMPG-DECOY (+1)	?	TRUE		unknown	0	0	0	0	1	0	0	0	0	1	0	0
561	TRUE	Empty	Cluster of precorrin-2 dehydrogenase OS=Komagataella pastoris OX=4922 GN=MET1 PE=3 SV=1 (A0A1B2J7X1_PICPA)	A0A1B2J7X1_PICPA [3]	63 kDa	TRUE		unknown	0	0	1	1	1	1	0	0	0	5	1	0
561.1	TRUE	Empty	precorrin-2 dehydrogenase OS=Komagataella pastoris OX=4922 GN=MET1 PE=3 SV=1	A0A1B2J7X1_PICPA	63 kDa	TRUE		unknown	0	0	1	0	1	1	0	0	0	5	0	0
561.2	TRUE	Empty	precorrin-2 dehydrogenase OS=Komagataella phaffii (strain GS115 / ATCC 20864) OX=644223 GN=PAS_chr1-3_0078 PE=3 SV=1	C4QV61_KOMPG (+1)	60 kDa	TRUE		unknown	0	0	0	1	1	0	0	0	0	2	1	0
562	TRUE	Empty	Cluster of BA75_02445T0 OS=Komagataella pastoris OX=4922 GN=SKI2 PE=3 SV=1 (A0A1B2JBT2_PICPA)	A0A1B2JBT2_PICPA [3]	140 kDa	TRUE		unknown	1	0	0	0	1	2	0	0	0	3	0	0
562.1	TRUE	Empty	BA75_02445T0 OS=Komagataella pastoris OX=4922 GN=SKI2 PE=3 SV=1	A0A1B2JBT2_PICPA	140 kDa	TRUE		unknown	1	0	0	0	0	1	0	0	0	3	0	0
562.2	TRUE	Empty	RNA helicase OS=Komagataella phaffii (strain GS115 / ATCC 20864) OX=644223 GN=PAS_chr2-1_0709 PE=3 SV=1	C4R1I3_KOMPG (+1)	140 kDa	TRUE		unknown	0	0	0	0	1	2	0	0	0	2	0	0
563	TRUE	Empty	Cluster of tr|A0A1B2JCK1|A0A1B2JCK1_PICPA-DECOY	tr|A0A1B2JCK1|A0A1B2JCK1_PICPA-DECOY [3]	?	TRUE		unknown	1	1	2	0	4	0	0	0	0	1	0	0
563.1	TRUE	Empty	tr|A0A1B2JCK1|A0A1B2JCK1_PICPA-DECOY	tr|A0A1B2JCK1|A0A1B2JCK1_PICPA-DECOY	?	TRUE		unknown	1	1	2	0	2	0	0	0	0	1	0	0
563.2	TRUE	Empty	tr|C4R7J3|C4R7J3_KOMPG-DECOY	tr|C4R7J3|C4R7J3_KOMPG-DECOY (+1)	?	TRUE		unknown	1	1	0	0	2	0	0	0	0	0	0	0
564	TRUE	Empty	Cluster of tr|C4QXL0|C4QXL0_KOMPG-DECOY	tr|C4QXL0|C4QXL0_KOMPG-DECOY	?	TRUE		unknown	0	0	0	0	5	1	0	0	0	1	0	0
564.1	TRUE	Empty	tr|C4QXL0|C4QXL0_KOMPG-DECOY	tr|C4QXL0|C4QXL0_KOMPG-DECOY (+1)	?	TRUE		unknown	0	0	0	0	3	1	0	0	0	1	0	0
564.2	TRUE	Empty	tr|A0A1B2J7Q9|A0A1B2J7Q9_PICPA-DECOY	tr|A0A1B2J7Q9|A0A1B2J7Q9_PICPA-DECOY	?	TRUE		unknown	0	0	0	0	5	0	0	0	0	1	0	0
565	TRUE	Empty	Cluster of tr|A0A1B2J9P4|A0A1B2J9P4_PICPA-DECOY	tr|A0A1B2J9P4|A0A1B2J9P4_PICPA-DECOY	?	TRUE		unknown	1	0	1	0	2	2	0	0	0	1	0	0
565.1	TRUE	Empty	tr|A0A1B2J9P4|A0A1B2J9P4_PICPA-DECOY	tr|A0A1B2J9P4|A0A1B2J9P4_PICPA-DECOY	?	TRUE		unknown	1	0	1	0	1	2	0	0	0	1	0	0
565.2	TRUE	Empty	tr|C4QVT4|C4QVT4_KOMPG-DECOY	tr|C4QVT4|C4QVT4_KOMPG-DECOY (+1)	?	TRUE		unknown	1	0	0	0	1	2	0	0	0	1	0	0
566	TRUE	Empty	Cluster of BA75_02128T0 OS=Komagataella pastoris OX=4922 GN=CRM1 PE=3 SV=1 (A0A1B2JE24_PICPA)	A0A1B2JE24_PICPA	124 kDa	TRUE		unknown	2	0	0	0	4	0	0	0	0	2	2	0
566.1	TRUE	Empty	BA75_02128T0 OS=Komagataella pastoris OX=4922 GN=CRM1 PE=3 SV=1	A0A1B2JE24_PICPA	124 kDa	TRUE		unknown	2	0	0	0	4	0	0	0	0	2	2	0
566.2	TRUE	Empty	Major karyopherin, involved in export of proteins, RNAs, and ribosomal subunits from the nucleus OS=Komagataella phaffii (strain GS115 / ATCC 20864) OX=644223 GN=PAS_chr2-2_0243 PE=3 SV=1	C4R2E8_KOMPG (+1)	124 kDa	TRUE		unknown	2	0	0	0	4	0	0	0	0	1	2	0
567	TRUE	Empty	Cluster of BA75_03041T0 OS=Komagataella pastoris OX=4922 GN=KSP1 PE=4 SV=1 (A0A1B2JCA6_PICPA)	A0A1B2JCA6_PICPA	88 kDa	TRUE		unknown	0	0	1	0	0	3	0	0	0	2	0	0
567.1	TRUE	Empty	BA75_03041T0 OS=Komagataella pastoris OX=4922 GN=KSP1 PE=4 SV=1	A0A1B2JCA6_PICPA	88 kDa	TRUE		unknown	0	0	1	0	0	2	0	0	0	2	0	0
567.2	TRUE	Empty	Protein kinase domain-containing protein OS=Komagataella phaffii (strain GS115 / ATCC 20864) OX=644223 GN=PAS_chr4_0260 PE=4 SV=1	C4R7B9_KOMPG (+1)	88 kDa	TRUE		unknown	0	0	0	0	0	1	0	0	0	0	0	0
568	TRUE	Empty	Cluster of tr|C4R0Z6|C4R0Z6_KOMPG-DECOY	tr|C4R0Z6|C4R0Z6_KOMPG-DECOY [3]	?	TRUE		unknown	0	0	0	0	1	1	0	0	0	5	0	0
568.1	TRUE	Empty	tr|C4R0Z6|C4R0Z6_KOMPG-DECOY	tr|C4R0Z6|C4R0Z6_KOMPG-DECOY (+1)	?	TRUE		unknown	0	0	0	0	1	1	0	0	0	3	0	0
568.2	TRUE	Empty	tr|A0A1B2JBB7|A0A1B2JBB7_PICPA-DECOY	tr|A0A1B2JBB7|A0A1B2JBB7_PICPA-DECOY	?	TRUE		unknown	0	0	0	0	0	1	0	0	0	4	0	0
569	TRUE	Empty	Cluster of DNA mismatch repair protein OS=Komagataella phaffii (strain GS115 / ATCC 20864) OX=644223 GN=PAS_chr2-1_0094 PE=3 SV=1 (C4QZM1_KOMPG)	C4QZM1_KOMPG [2]	132 kDa	TRUE		unknown	0	0	0	0	1	3	0	0	0	0	0	0
569.1	TRUE	Empty	DNA mismatch repair protein OS=Komagataella phaffii (strain GS115 / ATCC 20864) OX=644223 GN=PAS_chr2-1_0094 PE=3 SV=1	C4QZM1_KOMPG (+1)	132 kDa	TRUE		unknown	0	0	0	0	1	2	0	0	0	0	0	0
569.2	TRUE	Empty	DNA mismatch repair protein OS=Komagataella pastoris OX=4922 GN=MSH6 PE=3 SV=1	A0A1B2JIT6_PICPA	132 kDa	TRUE		unknown	0	0	0	0	0	1	0	0	0	0	0	0
570	TRUE	Empty	Cluster of Rho GTPase activating protein (RhoGAP) involved in control of the cytoskeleton organization OS=Komagataella phaffii (strain GS115 / ATCC 20864) OX=644223 GN=PAS_chr1-4_0424 PE=4 SV=1 (C4QYF1_KOMPG)	C4QYF1_KOMPG [3]	109 kDa	TRUE		unknown	0	0	0	0	3	3	0	0	0	3	0	0
570.1	TRUE	Empty	Rho GTPase activating protein (RhoGAP) involved in control of the cytoskeleton organization OS=Komagataella phaffii (strain GS115 / ATCC 20864) OX=644223 GN=PAS_chr1-4_0424 PE=4 SV=1	C4QYF1_KOMPG (+1)	109 kDa	TRUE		unknown	0	0	0	0	3	3	0	0	0	1	0	0
570.2	TRUE	Empty	BA75_03968T0 OS=Komagataella pastoris OX=4922 GN=BEM3 PE=4 SV=1	A0A1B2JGK0_PICPA	110 kDa	TRUE		unknown	0	0	0	0	2	0	0	0	0	3	0	0
571	TRUE	Empty	Cluster of CCT-beta OS=Komagataella phaffii (strain GS115 / ATCC 20864) OX=644223 GN=PAS_chr4_0121 PE=3 SV=1 (C4R6X3_KOMPG)	C4R6X3_KOMPG [2]	57 kDa	TRUE		unknown	0	0	0	0	0	2	0	0	1	1	0	0
571.1	TRUE	Empty	CCT-beta OS=Komagataella phaffii (strain GS115 / ATCC 20864) OX=644223 GN=PAS_chr4_0121 PE=3 SV=1	C4R6X3_KOMPG (+1)	57 kDa	TRUE		unknown	0	0	0	0	0	2	0	0	1	1	0	0
571.2	TRUE	Empty	CCT-beta OS=Komagataella pastoris OX=4922 GN=CCT2 PE=3 SV=1	A0A1B2JA95_PICPA	57 kDa	TRUE		unknown	0	0	0	0	0	1	0	0	1	0	0	0
572	TRUE	Empty	sp|C4QZ06|BMT3_KOMPG-DECOY	sp|C4QZ06|BMT3_KOMPG-DECOY (+1)	?	TRUE		unknown	2	1	1	0	0	2	0	0	0	5	1	0
573	TRUE	Empty	tr|A0A1B2J582|A0A1B2J582_PICPA-DECOY	tr|A0A1B2J582|A0A1B2J582_PICPA-DECOY	?	TRUE		unknown	0	0	0	0	0	1	0	0	0	3	2	0
574	TRUE	Empty	tr|A0A1B2J5N5|A0A1B2J5N5_PICPA-DECOY	tr|A0A1B2J5N5|A0A1B2J5N5_PICPA-DECOY	?	TRUE		unknown	1	0	1	0	6	0	0	0	1	2	0	0
575	TRUE	Empty	BA75_04544T0 OS=Komagataella pastoris OX=4922 GN=ATY40_BA7504544 PE=4 SV=1	A0A1B2JI70_PICPA	147 kDa	TRUE		unknown	0	0	1	1	2	2	0	0	0	0	0	0
576	TRUE	Empty	tr|C4R5U1|C4R5U1_KOMPG-DECOY	tr|C4R5U1|C4R5U1_KOMPG-DECOY (+1)	?	TRUE		unknown	1	0	0	0	1	0	0	0	0	2	0	0
577	TRUE	Empty	Cluster of tr|C4R3H1|C4R3H1_KOMPG-DECOY	tr|C4R3H1|C4R3H1_KOMPG-DECOY	?	TRUE		unknown	2	0	1	5	2	1	0	0	1	0	1	0
577.1	TRUE	Empty	tr|C4R3H1|C4R3H1_KOMPG-DECOY	tr|C4R3H1|C4R3H1_KOMPG-DECOY (+1)	?	TRUE		unknown	2	0	1	4	1	1	0	0	1	0	1	0
577.2	TRUE	Empty	tr|A0A1B2J6W4|A0A1B2J6W4_PICPA-DECOY	tr|A0A1B2J6W4|A0A1B2J6W4_PICPA-DECOY	?	TRUE		unknown	2	0	1	5	2	0	0	0	1	0	1	0
578	TRUE	Empty	Cluster of tr|F2QVL8|F2QVL8_KOMPC-DECOY	tr|F2QVL8|F2QVL8_KOMPC-DECOY	?	TRUE		unknown	0	0	0	0	3	0	0	1	0	2	0	0
578.1	TRUE	Empty	tr|F2QVL8|F2QVL8_KOMPC-DECOY	tr|F2QVL8|F2QVL8_KOMPC-DECOY	?	TRUE		unknown	0	0	0	0	3	0	0	1	0	2	0	0
578.2	TRUE	Empty	tr|A0A1B2JFN8|A0A1B2JFN8_PICPA-DECOY	tr|A0A1B2JFN8|A0A1B2JFN8_PICPA-DECOY	?	TRUE		unknown	0	0	0	0	2	0	0	1	0	1	0	0
579	TRUE	Empty	Cluster of tr|A0A1B2JD24|A0A1B2JD24_PICPA-DECOY	tr|A0A1B2JD24|A0A1B2JD24_PICPA-DECOY [3]	?	TRUE		unknown	2	0	2	0	5	0	0	0	1	0	0	0
579.1	TRUE	Empty	tr|A0A1B2JD24|A0A1B2JD24_PICPA-DECOY	tr|A0A1B2JD24|A0A1B2JD24_PICPA-DECOY	?	TRUE		unknown	1	0	0	0	3	0	0	0	1	0	0	0
579.2	TRUE	Empty	tr|C4R292|C4R292_KOMPG-DECOY	tr|C4R292|C4R292_KOMPG-DECOY (+1)	?	TRUE		unknown	2	0	2	0	4	0	0	0	1	0	0	0
580	TRUE	Empty	Cluster of tr|C4R7R9|C4R7R9_KOMPG-DECOY	tr|C4R7R9|C4R7R9_KOMPG-DECOY [2]	?	TRUE		unknown	1	0	0	0	2	1	0	0	1	1	2	0
580.1	TRUE	Empty	tr|C4R7R9|C4R7R9_KOMPG-DECOY	tr|C4R7R9|C4R7R9_KOMPG-DECOY (+1)	?	TRUE		unknown	1	0	0	0	2	1	0	0	1	1	1	0
580.2	TRUE	Empty	tr|A0A1B2JA90|A0A1B2JA90_PICPA-DECOY	tr|A0A1B2JA90|A0A1B2JA90_PICPA-DECOY	?	TRUE		unknown	1	0	0	0	1	0	0	0	0	1	1	0
581	TRUE	Empty	Cluster of BA75_01383T0 OS=Komagataella pastoris OX=4922 GN=RIF1 PE=4 SV=1 (A0A1B2J5U6_PICPA)	A0A1B2J5U6_PICPA	108 kDa	TRUE		unknown	0	0	1	0	0	2	0	1	0	3	0	0
581.1	TRUE	Empty	BA75_01383T0 OS=Komagataella pastoris OX=4922 GN=RIF1 PE=4 SV=1	A0A1B2J5U6_PICPA	108 kDa	TRUE		unknown	0	0	1	0	0	2	0	0	0	3	0	0
581.2	TRUE	Empty	Telomere-associated protein Rif1 N-terminal domain-containing protein OS=Komagataella phaffii (strain GS115 / ATCC 20864) OX=644223 GN=PAS_chr1-1_0156 PE=4 SV=1	C4QW97_KOMPG (+1)	108 kDa	TRUE		unknown	0	0	0	0	0	1	0	1	0	2	0	0
582	TRUE	Empty	Cluster of Pheromone-regulated membrane protein 10 OS=Komagataella phaffii (strain GS115 / ATCC 20864) OX=644223 GN=PAS_chr1-3_0044 PE=3 SV=1 (C4QV24_KOMPG)	C4QV24_KOMPG	111 kDa	TRUE		unknown	1	0	0	0	1	2	0	0	1	0	1	0
582.1	TRUE	Empty	Pheromone-regulated membrane protein 10 OS=Komagataella phaffii (strain GS115 / ATCC 20864) OX=644223 GN=PAS_chr1-3_0044 PE=3 SV=1	C4QV24_KOMPG (+1)	111 kDa	TRUE		unknown	1	0	0	0	0	1	0	0	1	0	1	0
582.2	TRUE	Empty	Pheromone-regulated membrane protein 10 OS=Komagataella pastoris OX=4922 GN=PRM10 PE=3 SV=1	A0A1B2J8V8_PICPA	112 kDa	TRUE		unknown	0	0	0	0	1	2	0	0	0	0	1	0
583	TRUE	Empty	Cluster of tr|C4R462|C4R462_KOMPG-DECOY	tr|C4R462|C4R462_KOMPG-DECOY [2]	?	TRUE		unknown	0	0	0	2	2	0	0	0	2	1	1	0
583.1	TRUE	Empty	tr|C4R462|C4R462_KOMPG-DECOY	tr|C4R462|C4R462_KOMPG-DECOY (+1)	?	TRUE		unknown	0	0	0	2	2	0	0	0	2	1	1	0
583.2	TRUE	Empty	tr|A0A1B2J9U8|A0A1B2J9U8_PICPA-DECOY	tr|A0A1B2J9U8|A0A1B2J9U8_PICPA-DECOY	?	TRUE		unknown	0	0	0	2	2	0	0	0	0	0	0	0
584	TRUE	Empty	Cluster of tr|C4R975|C4R975_KOMPG-DECOY	tr|C4R975|C4R975_KOMPG-DECOY [2]	?	TRUE		unknown	0	0	0	0	3	1	0	0	0	0	0	0
584.1	TRUE	Empty	tr|C4R975|C4R975_KOMPG-DECOY	tr|C4R975|C4R975_KOMPG-DECOY (+1)	?	TRUE		unknown	0	0	0	0	2	1	0	0	0	0	0	0
584.2	TRUE	Empty	tr|A0A1B2JHF5|A0A1B2JHF5_PICPA-DECOY	tr|A0A1B2JHF5|A0A1B2JHF5_PICPA-DECOY	?	TRUE		unknown	0	0	0	0	1	1	0	0	0	0	0	0
585	TRUE	Empty	tr|A0A1B2JCK8|A0A1B2JCK8_PICPA-DECOY	tr|A0A1B2JCK8|A0A1B2JCK8_PICPA-DECOY	?	TRUE		unknown	1	0	0	1	1	0	0	1	1	3	1	0
586	TRUE	Empty	tr|C4R6F5|C4R6F5_KOMPG-DECOY	tr|C4R6F5|C4R6F5_KOMPG-DECOY (+1)	?	TRUE		unknown	0	0	0	0	3	0	1	1	1	3	0	0
587	TRUE	Empty	BA75_03038T0 OS=Komagataella pastoris OX=4922 GN=KAP95 PE=3 SV=1	A0A1B2JCH0_PICPA	96 kDa			unknown	2	0	1	0	1	2	0	0	2	0	2	0
588	TRUE	Empty	Peptidyl-prolyl isomerase OS=Komagataella phaffii (strain GS115 / ATCC 20864) OX=644223 GN=PAS_c034_0039 PE=3 SV=1	C4R9G1_KOMPG	86 kDa	TRUE		unknown	1	0	0	0	0	3	0	0	0	3	1	0
589	TRUE	Empty	Cluster of Protein SDA1 OS=Komagataella pastoris OX=4922 GN=SDA1 PE=3 SV=1 (A0A1B2J9L4_PICPA)	A0A1B2J9L4_PICPA	81 kDa	TRUE		unknown	0	0	0	1	2	2	0	0	2	2	1	0
589.1	TRUE	Empty	Protein SDA1 OS=Komagataella pastoris OX=4922 GN=SDA1 PE=3 SV=1	A0A1B2J9L4_PICPA	81 kDa	TRUE		unknown	0	0	0	1	1	2	0	0	2	2	1	0
589.2	TRUE	Empty	Protein SDA1 OS=Komagataella phaffii (strain GS115 / ATCC 20864) OX=644223 GN=PAS_chr1-4_0311 PE=3 SV=1	C4QY29_KOMPG (+1)	81 kDa	TRUE		unknown	0	0	0	0	1	2	0	0	1	1	0	0
590	TRUE	Empty	Cluster of ATPase of the AAA family OS=Komagataella phaffii (strain GS115 / ATCC 20864) OX=644223 GN=PAS_chr4_0241 PE=4 SV=1 (C4R795_KOMPG)	C4R795_KOMPG	80 kDa	TRUE		unknown	0	0	1	1	2	0	0	0	1	1	0	0
590.1	TRUE	Empty	ATPase of the AAA family OS=Komagataella phaffii (strain GS115 / ATCC 20864) OX=644223 GN=PAS_chr4_0241 PE=4 SV=1	C4R795_KOMPG (+1)	80 kDa	TRUE		unknown	0	0	1	1	1	0	0	0	1	1	0	0
590.2	TRUE	Empty	BA75_03064T0 OS=Komagataella pastoris OX=4922 GN=SAP1 PE=4 SV=1	A0A1B2JBS9_PICPA	83 kDa	TRUE		unknown	0	0	1	1	1	0	0	0	0	1	0	0
591	TRUE	Empty	Cluster of Protein whose overexpression affects chromosome stability, potential Cdc28p substrate OS=Komagataella phaffii (strain GS115 / ATCC 20864) OX=644223 GN=PAS_chr1-1_0238 PE=4 SV=1 (C4QWI4_KOMPG)	C4QWI4_KOMPG [2]	116 kDa	TRUE		unknown	0	0	1	0	2	0	0	0	1	1	1	0
591.1	TRUE	Empty	Protein whose overexpression affects chromosome stability, potential Cdc28p substrate OS=Komagataella phaffii (strain GS115 / ATCC 20864) OX=644223 GN=PAS_chr1-1_0238 PE=4 SV=1	C4QWI4_KOMPG (+1)	116 kDa	TRUE		unknown	0	0	1	0	2	0	0	0	1	0	1	0
591.2	TRUE	Empty	BA75_01301T0 OS=Komagataella pastoris OX=4922 GN=ATY40_BA7501301 PE=4 SV=1	A0A1B2J7Y2_PICPA	116 kDa	TRUE		unknown	0	0	1	0	0	0	0	0	0	1	1	0
592	TRUE	Empty	Cluster of tr|C4QWI4|C4QWI4_KOMPG-DECOY	tr|C4QWI4|C4QWI4_KOMPG-DECOY	?	TRUE		unknown	0	0	2	0	1	0	0	0	0	0	0	0
592.1	TRUE	Empty	tr|C4QWI4|C4QWI4_KOMPG-DECOY	tr|C4QWI4|C4QWI4_KOMPG-DECOY (+1)	?	TRUE		unknown	0	0	2	0	1	0	0	0	0	0	0	0
592.2	TRUE	Empty	tr|A0A1B2J7Y2|A0A1B2J7Y2_PICPA-DECOY	tr|A0A1B2J7Y2|A0A1B2J7Y2_PICPA-DECOY	?	TRUE		unknown	0	0	2	0	0	0	0	0	0	0	0	0
593	TRUE	Empty	Cluster of Phospholipid-transporting ATPase OS=Komagataella phaffii (strain GS115 / ATCC 20864) OX=644223 GN=PAS_chr1-4_0233 PE=3 SV=1 (C4QXU5_KOMPG)	C4QXU5_KOMPG [3]	124 kDa	TRUE		unknown	0	0	0	0	1	2	0	1	0	0	0	0
593.1	TRUE	Empty	Phospholipid-transporting ATPase OS=Komagataella phaffii (strain GS115 / ATCC 20864) OX=644223 GN=PAS_chr1-4_0233 PE=3 SV=1	C4QXU5_KOMPG (+1)	124 kDa	TRUE		unknown	0	0	0	0	1	2	0	1	0	0	0	0
593.2	TRUE	Empty	Phospholipid-transporting ATPase OS=Komagataella pastoris OX=4922 GN=NEO1 PE=3 SV=1	A0A1B2J6W8_PICPA	124 kDa	TRUE		unknown	0	0	0	0	1	2	0	0	0	0	0	0
594	TRUE	Empty	Cluster of tr|C4R382|C4R382_KOMPG-DECOY	tr|C4R382|C4R382_KOMPG-DECOY	?	TRUE		unknown	0	0	1	0	0	2	0	0	0	0	0	0
594.1	TRUE	Empty	tr|C4R382|C4R382_KOMPG-DECOY	tr|C4R382|C4R382_KOMPG-DECOY (+1)	?	TRUE		unknown	0	0	1	0	0	1	0	0	0	0	0	0
594.2	TRUE	Empty	tr|A0A1B2JFQ9|A0A1B2JFQ9_PICPA-DECOY	tr|A0A1B2JFQ9|A0A1B2JFQ9_PICPA-DECOY	?	TRUE		unknown	0	0	1	0	0	2	0	0	0	0	0	0
595	TRUE	Empty	DNA polymerase OS=Komagataella pastoris OX=4922 GN=REV3 PE=3 SV=1	A0A1B2JDJ5_PICPA	172 kDa	TRUE		unknown	1	0	1	0	5	2	0	1	0	1	0	0
596	TRUE	Empty	Catalytic subunit of the Dcp1p-Dcp2p decapping enzyme complex OS=Komagataella phaffii (strain GS115 / ATCC 20864) OX=644223 GN=PAS_chr4_0194 PE=3 SV=1	C4R744_KOMPG (+1)	101 kDa	TRUE		unknown	1	0	0	3	2	1	0	0	0	5	2	0
597	TRUE	Empty	tr|A0A1B2JGF6|A0A1B2JGF6_PICPA-DECOY	tr|A0A1B2JGF6|A0A1B2JGF6_PICPA-DECOY	?	TRUE		unknown	5	0	1	0	2	3	0	0	0	5	1	0
598	TRUE	Empty	tr|C4R5J0|C4R5J0_KOMPG-DECOY	tr|C4R5J0|C4R5J0_KOMPG-DECOY (+1)	?			unknown	0	0	0	1	2	1	0	0	1	5	0	0
599	TRUE	Empty	tr|A0A1B2JF13|A0A1B2JF13_PICPA-DECOY	tr|A0A1B2JF13|A0A1B2JF13_PICPA-DECOY	?	TRUE		unknown	1	0	1	2	5	0	0	1	0	1	1	0
600	TRUE	Empty	tr|C4QZM2|C4QZM2_KOMPG-DECOY	tr|C4QZM2|C4QZM2_KOMPG-DECOY (+1)	?	TRUE		unknown	3	1	1	0	3	8	2	0	2	6	2	0
601	TRUE	Empty	tr|A0A1B2JI13|A0A1B2JI13_PICPA-DECOY	tr|A0A1B2JI13|A0A1B2JI13_PICPA-DECOY	?	TRUE		unknown	10	0	2	0	3	1	1	3	2	5	0	0
602	TRUE	Empty	tr|C4R154|C4R154_KOMPG-DECOY	tr|C4R154|C4R154_KOMPG-DECOY (+1)	?			unknown	2	4	0	0	2	4	9	2	2	2	7	1
603	TRUE	Empty	Autophagy-related protein 11 OS=Komagataella pastoris OX=4922 GN=ATG11 PE=3 SV=1	A0A1B2JFU4_PICPA	151 kDa	TRUE		unknown	0	0	1	0	1	0	0	0	0	2	1	0
604	TRUE	Empty	tr|A0A1B2JF59|A0A1B2JF59_PICPA-DECOY	tr|A0A1B2JF59|A0A1B2JF59_PICPA-DECOY	?	TRUE		unknown	1	0	1	0	0	0	0	0	0	2	0	0
605	TRUE	Empty	tr|C4QXB5|C4QXB5_KOMPG-DECOY	tr|C4QXB5|C4QXB5_KOMPG-DECOY	?	TRUE		unknown	1	0	2	1	0	0	0	0	2	0	1	0
606	TRUE	Empty	tr|A0A1B2J9G4|A0A1B2J9G4_PICPA-DECOY	tr|A0A1B2J9G4|A0A1B2J9G4_PICPA-DECOY	?	TRUE		unknown	0	0	0	0	2	1	0	0	1	2	1	0
607	TRUE	Empty	Cluster of tr|C4QWG7|C4QWG7_KOMPG-DECOY	tr|C4QWG7|C4QWG7_KOMPG-DECOY [2]	?	TRUE		unknown	1	0	0	0	4	2	0	1	1	2	0	0
607.1	TRUE	Empty	tr|C4QWG7|C4QWG7_KOMPG-DECOY	tr|C4QWG7|C4QWG7_KOMPG-DECOY (+1)	?	TRUE		unknown	0	0	0	0	3	2	0	1	0	2	0	0
607.2	TRUE	Empty	tr|A0A1B2J5K1|A0A1B2J5K1_PICPA-DECOY	tr|A0A1B2J5K1|A0A1B2J5K1_PICPA-DECOY	?	TRUE		unknown	1	0	0	0	1	1	0	1	1	1	0	0
608	TRUE	Empty	Cluster of tr|A0A1B2JCL6|A0A1B2JCL6_PICPA-DECOY	tr|A0A1B2JCL6|A0A1B2JCL6_PICPA-DECOY	?	TRUE		unknown	1	0	0	1	0	2	0	0	2	0	1	0
608.1	TRUE	Empty	tr|A0A1B2JCL6|A0A1B2JCL6_PICPA-DECOY	tr|A0A1B2JCL6|A0A1B2JCL6_PICPA-DECOY	?	TRUE		unknown	1	0	0	1	0	2	0	0	1	0	1	0
608.2	TRUE	Empty	tr|C4R1J7|C4R1J7_KOMPG-DECOY	tr|C4R1J7|C4R1J7_KOMPG-DECOY (+1)	?	TRUE		unknown	1	0	0	0	0	0	0	0	1	0	1	0
609	TRUE	Empty	Cluster of Essential protein required for determination of budding pattern OS=Komagataella phaffii (strain GS115 / ATCC 20864) OX=644223 GN=PAS_chr1-4_0128 PE=4 SV=1 (C4QXI3_KOMPG)	C4QXI3_KOMPG	182 kDa	TRUE		unknown	3	0	0	0	4	0	0	0	0	1	0	0
609.1	TRUE	Empty	Essential protein required for determination of budding pattern OS=Komagataella phaffii (strain GS115 / ATCC 20864) OX=644223 GN=PAS_chr1-4_0128 PE=4 SV=1	C4QXI3_KOMPG	182 kDa	TRUE		unknown	3	0	0	0	3	0	0	0	0	1	0	0
609.2	TRUE	Empty	Cytokinesis protein OS=Komagataella phaffii (strain ATCC 76273 / CBS 7435 / CECT 11047 / NRRL Y-11430 / Wegner 21-1) OX=981350 GN=IQG1 PE=4 SV=1	F2QN75_KOMPC	184 kDa	TRUE		unknown	3	0	0	0	4	0	0	0	0	1	0	0
610	TRUE	Empty	Cluster of tr|A0A1B2JFM8|A0A1B2JFM8_PICPA-DECOY	tr|A0A1B2JFM8|A0A1B2JFM8_PICPA-DECOY [3]	?	TRUE		unknown	1	0	3	0	1	2	0	0	1	0	1	0
610.1	TRUE	Empty	tr|A0A1B2JFM8|A0A1B2JFM8_PICPA-DECOY	tr|A0A1B2JFM8|A0A1B2JFM8_PICPA-DECOY	?	TRUE		unknown	1	0	2	0	0	2	0	0	1	0	1	0
610.2	TRUE	Empty	tr|C4R5S5|C4R5S5_KOMPG-DECOY	tr|C4R5S5|C4R5S5_KOMPG-DECOY (+1)	?	TRUE		unknown	0	0	3	0	1	1	0	0	1	0	0	0
611	TRUE	Empty	Cluster of BA75_05047T0 OS=Komagataella pastoris OX=4922 GN=ITC1 PE=4 SV=1 (A0A1B2JHS7_PICPA)	A0A1B2JHS7_PICPA	144 kDa	TRUE		unknown	1	0	1	0	5	1	0	1	0	1	0	0
611.1	TRUE	Empty	BA75_05047T0 OS=Komagataella pastoris OX=4922 GN=ITC1 PE=4 SV=1	A0A1B2JHS7_PICPA	144 kDa	TRUE		unknown	1	0	0	0	5	1	0	1	0	1	0	0
611.2	TRUE	Empty	Mitochondrial protein required for assembly of ubiquinol cytochrome-c reductase complex (cytochrome) OS=Komagataella phaffii (strain GS115 / ATCC 20864) OX=644223 GN=PAS_chr2-1_0214 PE=4 SV=1	C4QZZ8_KOMPG (+1)	145 kDa	TRUE		unknown	0	0	1	0	4	1	0	0	0	1	0	0
612	TRUE	Empty	Cluster of tr|A0A1B2JGP7|A0A1B2JGP7_PICPA-DECOY	tr|A0A1B2JGP7|A0A1B2JGP7_PICPA-DECOY	?	TRUE		unknown	3	0	0	0	1	0	0	0	0	2	2	0
612.1	TRUE	Empty	tr|A0A1B2JGP7|A0A1B2JGP7_PICPA-DECOY	tr|A0A1B2JGP7|A0A1B2JGP7_PICPA-DECOY	?	TRUE		unknown	3	0	0	0	1	0	0	0	0	2	2	0
612.2	TRUE	Empty	tr|C4QZ99|C4QZ99_KOMPG-DECOY	tr|C4QZ99|C4QZ99_KOMPG-DECOY	?	TRUE		unknown	3	0	0	0	0	0	0	0	0	0	2	0
612.3	TRUE	Empty	tr|F2QQF8|F2QQF8_KOMPC-DECOY	tr|F2QQF8|F2QQF8_KOMPC-DECOY	?	TRUE		unknown	0	0	0	0	0	0	0	0	0	0	0	0
613	TRUE	Empty	Cluster of tr|C4QXU5|C4QXU5_KOMPG-DECOY	tr|C4QXU5|C4QXU5_KOMPG-DECOY [3]	?	TRUE		unknown	3	0	0	0	1	1	0	0	0	1	0	0
613.1	TRUE	Empty	tr|C4QXU5|C4QXU5_KOMPG-DECOY	tr|C4QXU5|C4QXU5_KOMPG-DECOY (+1)	?	TRUE		unknown	2	0	0	0	1	0	0	0	0	1	0	0
613.2	TRUE	Empty	tr|A0A1B2J6W8|A0A1B2J6W8_PICPA-DECOY	tr|A0A1B2J6W8|A0A1B2J6W8_PICPA-DECOY	?	TRUE		unknown	2	0	0	0	0	1	0	0	0	0	0	0
614	TRUE	Empty	Cluster of Ion transporter, similar to mammalian electroneutral Na(+)-(K+)-C1-cotransporter family OS=Komagataella phaffii (strain GS115 / ATCC 20864) OX=644223 GN=PAS_chr3_0643 PE=4 SV=1 (C4R556_KOMPG)	C4R556_KOMPG [3]	128 kDa	TRUE		unknown	0	0	0	0	2	1	0	0	0	3	1	0
614.1	TRUE	Empty	Ion transporter, similar to mammalian electroneutral Na(+)-(K+)-C1-cotransporter family OS=Komagataella phaffii (strain GS115 / ATCC 20864) OX=644223 GN=PAS_chr3_0643 PE=4 SV=1	C4R556_KOMPG (+1)	128 kDa	TRUE		unknown	0	0	0	0	2	1	0	0	0	2	1	0
614.2	TRUE	Empty	BA75_03906T0 OS=Komagataella pastoris OX=4922 GN=YBR235W PE=4 SV=1	A0A1B2JGS5_PICPA	128 kDa	TRUE		unknown	0	0	0	0	1	1	0	0	0	2	1	0
615	TRUE	Empty	Cluster of tr|C4R6B9|C4R6B9_KOMPG-DECOY	tr|C4R6B9|C4R6B9_KOMPG-DECOY [2]	?	TRUE		unknown	0	0	0	0	2	1	0	2	0	1	0	0
615.1	TRUE	Empty	tr|C4R6B9|C4R6B9_KOMPG-DECOY	tr|C4R6B9|C4R6B9_KOMPG-DECOY (+1)	?	TRUE		unknown	0	0	0	0	2	1	0	2	0	0	0	0
615.2	TRUE	Empty	tr|A0A1B2JG24|A0A1B2JG24_PICPA-DECOY	tr|A0A1B2JG24|A0A1B2JG24_PICPA-DECOY	?	TRUE		unknown	0	0	0	0	2	0	0	1	0	1	0	0
616	TRUE	Empty	Cluster of FACT complex subunit OS=Komagataella pastoris OX=4922 GN=SPT16 PE=3 SV=1 (A0A1B2JEW5_PICPA)	A0A1B2JEW5_PICPA [3]	115 kDa	TRUE		unknown	2	0	0	0	1	0	0	0	0	4	0	0
616.1	TRUE	Empty	FACT complex subunit OS=Komagataella pastoris OX=4922 GN=SPT16 PE=3 SV=1	A0A1B2JEW5_PICPA	115 kDa	TRUE		unknown	1	0	0	0	1	0	0	0	0	4	0	0
616.2	TRUE	Empty	FACT complex subunit OS=Komagataella phaffii (strain GS115 / ATCC 20864) OX=644223 GN=PAS_chr1-4_0529 PE=1 SV=1	C4QYQ8_KOMPG (+1)	115 kDa	TRUE		unknown	2	0	0	0	1	0	0	0	0	3	0	0
617	TRUE	Empty	tr|A0A1B2JEU6|A0A1B2JEU6_PICPA-DECOY	tr|A0A1B2JEU6|A0A1B2JEU6_PICPA-DECOY	?	TRUE		unknown	0	0	2	0	5	1	0	0	1	3	2	0
618	TRUE	Empty	tr|C4QVQ3|C4QVQ3_KOMPG-DECOY	tr|C4QVQ3|C4QVQ3_KOMPG-DECOY (+1)	?	TRUE		unknown	0	0	0	0	1	2	0	0	1	4	0	0
619	TRUE	Empty	BA75_01089T0 OS=Komagataella pastoris OX=4922 GN=UTP20 PE=4 SV=1	A0A1B2J582_PICPA	294 kDa	TRUE		unknown	2	0	1	0	2	0	0	0	2	2	0	0
620	TRUE	Empty	tr|A0A1B2JE42|A0A1B2JE42_PICPA-DECOY	tr|A0A1B2JE42|A0A1B2JE42_PICPA-DECOY	?	TRUE		unknown	0	0	0	1	0	1	0	0	0	3	1	0
621	TRUE	Empty	tr|A0A1B2JAC4|A0A1B2JAC4_PICPA-DECOY	tr|A0A1B2JAC4|A0A1B2JAC4_PICPA-DECOY	?	TRUE		unknown	1	0	1	0	2	0	0	0	0	0	0	0
622	TRUE	Empty	Cluster of tr|A0A1B2JFB5|A0A1B2JFB5_PICPA-DECOY	tr|A0A1B2JFB5|A0A1B2JFB5_PICPA-DECOY	?	TRUE		unknown	0	0	2	0	4	0	0	0	2	1	0	0
622.1	TRUE	Empty	tr|A0A1B2JFB5|A0A1B2JFB5_PICPA-DECOY	tr|A0A1B2JFB5|A0A1B2JFB5_PICPA-DECOY	?	TRUE		unknown	0	0	2	0	4	0	0	0	2	0	0	0
622.2	TRUE	Empty	tr|C4QZ77|C4QZ77_KOMPG-DECOY	tr|C4QZ77|C4QZ77_KOMPG-DECOY (+1)	?	TRUE		unknown	0	0	2	0	4	0	0	0	0	1	0	0
623	TRUE	Empty	Cluster of Nucleolar protein Dnt1-like N-terminal domain-containing protein OS=Komagataella phaffii (strain GS115 / ATCC 20864) OX=644223 GN=PAS_chr2-2_0307 PE=4 SV=1 (C4R275_KOMPG)	C4R275_KOMPG	102 kDa	TRUE		unknown	0	0	0	1	2	1	0	0	1	2	0	0
623.1	TRUE	Empty	Nucleolar protein Dnt1-like N-terminal domain-containing protein OS=Komagataella phaffii (strain GS115 / ATCC 20864) OX=644223 GN=PAS_chr2-2_0307 PE=4 SV=1	C4R275_KOMPG	102 kDa	TRUE		unknown	0	0	0	1	2	1	0	0	1	2	0	0
623.2	TRUE	Empty	Uncharacterized protein OS=Komagataella phaffii (strain ATCC 76273 / CBS 7435 / CECT 11047 / NRRL Y-11430 / Wegner 21-1) OX=981350 GN=PP7435_Chr2-0326 PE=4 SV=1	F2QRJ2_KOMPC	42 kDa	TRUE		unknown	0	0	0	0	0	0	0	0	0	0	0	0
624	TRUE	Empty	Cluster of Lon protease homolog, mitochondrial OS=Komagataella phaffii (strain GS115 / ATCC 20864) OX=644223 GN=PIM1 PE=3 SV=1 (C4R7W9_KOMPG)	C4R7W9_KOMPG	124 kDa	TRUE		unknown	0	0	0	0	2	2	0	0	1	2	1	0
624.1	TRUE	Empty	Lon protease homolog, mitochondrial OS=Komagataella phaffii (strain GS115 / ATCC 20864) OX=644223 GN=PIM1 PE=3 SV=1	C4R7W9_KOMPG (+1)	124 kDa	TRUE		unknown	0	0	0	0	2	1	0	0	0	1	0	0
624.2	TRUE	Empty	Lon protease homolog, mitochondrial OS=Komagataella pastoris OX=4922 GN=PIM1 PE=3 SV=1	A0A1B2JHL3_PICPA	124 kDa	TRUE		unknown	0	0	0	0	2	1	0	0	1	1	1	0
625	TRUE	Empty	Cluster of tr|A0A1B2JFE9|A0A1B2JFE9_PICPA-DECOY	tr|A0A1B2JFE9|A0A1B2JFE9_PICPA-DECOY	?	TRUE		unknown	1	0	0	1	2	0	0	0	0	4	1	0
625.1	TRUE	Empty	tr|A0A1B2JFE9|A0A1B2JFE9_PICPA-DECOY	tr|A0A1B2JFE9|A0A1B2JFE9_PICPA-DECOY	?	TRUE		unknown	1	0	0	0	0	0	0	0	0	4	1	0
625.2	TRUE	Empty	tr|C4R5I8|C4R5I8_KOMPG-DECOY	tr|C4R5I8|C4R5I8_KOMPG-DECOY (+1)	?	TRUE		unknown	1	0	0	1	2	0	0	0	0	2	1	0
626	TRUE	Empty	Cluster of BA75_03191T0 OS=Komagataella pastoris OX=4922 GN=ISW2 PE=3 SV=1 (A0A1B2JBA8_PICPA)	A0A1B2JBA8_PICPA	118 kDa	TRUE		unknown	0	0	1	0	0	0	0	0	1	2	0	0
626.1	TRUE	Empty	BA75_03191T0 OS=Komagataella pastoris OX=4922 GN=ISW2 PE=3 SV=1	A0A1B2JBA8_PICPA	118 kDa	TRUE		unknown	0	0	1	0	0	0	0	0	1	1	0	0
626.2	TRUE	Empty	Member of the imitation-switch (ISWI) class of ATP-dependent chromatin remodeling complexes OS=Komagataella phaffii (strain GS115 / ATCC 20864) OX=644223 GN=PAS_chr4_0128 PE=3 SV=1	C4R6Y0_KOMPG (+1)	114 kDa	TRUE		unknown	0	0	1	0	0	0	0	0	1	1	0	0
627	TRUE	Empty	Cluster of tr|C4QWR6|C4QWR6_KOMPG-DECOY	tr|C4QWR6|C4QWR6_KOMPG-DECOY [2]	?	TRUE		unknown	1	0	0	1	2	2	0	0	0	2	1	0
627.1	TRUE	Empty	tr|C4QWR6|C4QWR6_KOMPG-DECOY	tr|C4QWR6|C4QWR6_KOMPG-DECOY (+1)	?	TRUE		unknown	1	0	0	1	2	2	0	0	0	1	1	0
627.2	TRUE	Empty	tr|A0A1B2J8V5|A0A1B2J8V5_PICPA-DECOY	tr|A0A1B2J8V5|A0A1B2J8V5_PICPA-DECOY	?	TRUE		unknown	1	0	0	0	1	2	0	0	0	1	1	0
628	TRUE	Empty	Cluster of tr|O74257|O74257_PICPA-DECOY	tr|O74257|O74257_PICPA-DECOY	?	TRUE		unknown	1	0	0	0	0	1	0	1	1	2	0	0
628.1	TRUE	Empty	tr|O74257|O74257_PICPA-DECOY	tr|O74257|O74257_PICPA-DECOY	?	TRUE		unknown	1	0	0	0	0	0	0	0	1	0	0	0
628.2	TRUE	Empty	tr|A0A1B2JEB1|A0A1B2JEB1_PICPA-DECOY	tr|A0A1B2JEB1|A0A1B2JEB1_PICPA-DECOY	?	TRUE		unknown	0	0	0	0	0	1	0	1	0	2	0	0
628.3	TRUE	Empty	tr|C4R6N9|C4R6N9_KOMPG-DECOY	tr|C4R6N9|C4R6N9_KOMPG-DECOY (+1)	?	TRUE		unknown	1	0	0	0	0	0	0	1	1	2	0	0
628.4	TRUE	Empty	tr|O93813|O93813_PICPA-DECOY	tr|O93813|O93813_PICPA-DECOY	?	TRUE		unknown	0	0	0	0	0	0	0	0	0	0	0	0
629	TRUE	Empty	Cluster of valine--tRNA ligase OS=Komagataella pastoris OX=4922 GN=VAS1 PE=3 SV=1 (A0A1B2JGB7_PICPA)	A0A1B2JGB7_PICPA	122 kDa	TRUE		unknown	2	0	0	3	6	1	0	0	1	0	0	0
629.1	TRUE	Empty	valine--tRNA ligase OS=Komagataella pastoris OX=4922 GN=VAS1 PE=3 SV=1	A0A1B2JGB7_PICPA	122 kDa	TRUE		unknown	2	0	0	2	6	1	0	0	1	0	0	0
629.2	TRUE	Empty	valine--tRNA ligase OS=Komagataella phaffii (strain GS115 / ATCC 20864) OX=644223 GN=PAS_chr3_0754 PE=3 SV=1	C4R5G8_KOMPG	122 kDa	TRUE		unknown	0	0	0	3	1	0	0	0	0	0	0	0
629.3	TRUE	Empty	valine--tRNA ligase OS=Komagataella phaffii (strain ATCC 76273 / CBS 7435 / CECT 11047 / NRRL Y-11430 / Wegner 21-1) OX=981350 GN=VAS1 PE=3 SV=1	F2QVH3_KOMPC	119 kDa	TRUE		unknown	0	0	0	3	1	0	0	0	0	0	0	0
630	TRUE	Empty	Cluster of Cullin, structural protein of SCF complexes, involved in ubiquination OS=Komagataella phaffii (strain GS115 / ATCC 20864) OX=644223 GN=PAS_chr1-1_0312 PE=3 SV=1 (C4QWR6_KOMPG)	C4QWR6_KOMPG [2]	91 kDa	TRUE		unknown	2	0	0	0	1	0	0	0	0	2	0	0
630.1	TRUE	Empty	Cullin, structural protein of SCF complexes, involved in ubiquination OS=Komagataella phaffii (strain GS115 / ATCC 20864) OX=644223 GN=PAS_chr1-1_0312 PE=3 SV=1	C4QWR6_KOMPG (+1)	91 kDa	TRUE		unknown	2	0	0	0	1	0	0	0	0	2	0	0
630.2	TRUE	Empty	BA75_01222T0 OS=Komagataella pastoris OX=4922 GN=CDC53 PE=3 SV=1	A0A1B2J8V5_PICPA	91 kDa	TRUE		unknown	1	0	0	0	1	0	0	0	0	2	0	0
631	TRUE	Empty	Cluster of tr|A0A1B2J7I0|A0A1B2J7I0_PICPA-DECOY	tr|A0A1B2J7I0|A0A1B2J7I0_PICPA-DECOY	?	TRUE		unknown	3	0	0	0	2	1	0	0	0	1	0	0
631.1	TRUE	Empty	tr|A0A1B2J7I0|A0A1B2J7I0_PICPA-DECOY	tr|A0A1B2J7I0|A0A1B2J7I0_PICPA-DECOY	?	TRUE		unknown	3	0	0	0	2	1	0	0	0	1	0	0
631.2	TRUE	Empty	tr|F2QNC4|F2QNC4_KOMPC-DECOY	tr|F2QNC4|F2QNC4_KOMPC-DECOY	?	TRUE		unknown	2	0	0	0	2	1	0	0	0	1	0	0
632	TRUE	Empty	Cluster of tr|A0A1B2JDQ5|A0A1B2JDQ5_PICPA-DECOY	tr|A0A1B2JDQ5|A0A1B2JDQ5_PICPA-DECOY	?	TRUE		unknown	2	0	0	0	0	2	0	0	0	2	1	0
632.1	TRUE	Empty	tr|A0A1B2JDQ5|A0A1B2JDQ5_PICPA-DECOY	tr|A0A1B2JDQ5|A0A1B2JDQ5_PICPA-DECOY	?	TRUE		unknown	2	0	0	0	0	2	0	0	0	2	1	0
632.2	TRUE	Empty	tr|C4R793|C4R793_KOMPG-DECOY	tr|C4R793|C4R793_KOMPG-DECOY (+1)	?	TRUE		unknown	2	0	0	0	0	2	0	0	0	2	1	0
633	TRUE	Empty	Cluster of Protein-serine/threonine kinase OS=Komagataella pastoris OX=4922 GN=PKP1 PE=3 SV=1 (A0A1B2J9W9_PICPA)	A0A1B2J9W9_PICPA	50 kDa	TRUE		unknown	2	0	0	0	0	3	0	0	0	4	1	0
633.1	TRUE	Empty	Protein-serine/threonine kinase OS=Komagataella pastoris OX=4922 GN=PKP1 PE=3 SV=1	A0A1B2J9W9_PICPA	50 kDa	TRUE		unknown	2	0	0	0	0	3	0	0	0	4	1	0
633.2	TRUE	Empty	Protein-serine/threonine kinase OS=Komagataella phaffii (strain GS115 / ATCC 20864) OX=644223 GN=PAS_chr1-1_0297 PE=3 SV=1	C4QWQ0_KOMPG (+1)	50 kDa	TRUE		unknown	0	0	0	0	0	0	0	0	0	0	0	0
634	TRUE	Empty	tr|A0A1G4KPQ8|A0A1G4KPQ8_KOMPC-DECOY	tr|A0A1G4KPQ8|A0A1G4KPQ8_KOMPC-DECOY (+1)	?	TRUE		unknown	4	0	0	0	0	2	0	0	2	4	1	0
635	TRUE	Empty	tr|C4R6C5|C4R6C5_KOMPG-DECOY	tr|C4R6C5|C4R6C5_KOMPG-DECOY (+1)	?	TRUE		unknown	1	0	0	0	1	3	0	1	0	0	0	0
636	TRUE	Empty	Spindle pole body spacer protein SPC110 OS=Komagataella phaffii (strain GS115 / ATCC 20864) OX=644223 GN=PAS_chr4_0295 PE=4 SV=1	C4R7F7_KOMPG (+1)	111 kDa	TRUE		unknown	1	0	0	1	2	0	0	0	1	1	0	0
637	TRUE	Empty	tr|F2QXX7|F2QXX7_KOMPC-DECOY	tr|F2QXX7|F2QXX7_KOMPC-DECOY	?	TRUE		unknown	0	0	0	0	3	1	0	0	0	2	2	0
638	TRUE	Empty	tr|A0A1B2J8M3|A0A1B2J8M3_PICPA-DECOY	tr|A0A1B2J8M3|A0A1B2J8M3_PICPA-DECOY	?	TRUE		unknown	0	0	0	1	2	2	0	0	1	1	0	0
639	TRUE	Empty	DUF3020 domain-containing protein OS=Komagataella phaffii (strain GS115 / ATCC 20864) OX=644223 GN=PAS_chr2-1_0866 PE=4 SV=1	C4R165_KOMPG (+1)	108 kDa	TRUE		unknown	1	0	1	1	2	0	0	1	2	1	0	0
640	TRUE	Empty	Cluster of BA75_04164T0 OS=Komagataella pastoris OX=4922 GN=RMD8 PE=3 SV=1 (A0A1B2JE00_PICPA)	A0A1B2JE00_PICPA	71 kDa	TRUE		unknown	0	0	2	1	3	1	0	0	2	5	1	0
640.1	TRUE	Empty	BA75_04164T0 OS=Komagataella pastoris OX=4922 GN=RMD8 PE=3 SV=1	A0A1B2JE00_PICPA	71 kDa	TRUE		unknown	0	0	2	1	3	1	0	0	2	5	0	0
640.2	TRUE	Empty	Cytosolic protein required for sporulation OS=Komagataella phaffii (strain GS115 / ATCC 20864) OX=644223 GN=PAS_chr1-4_0597 PE=3 SV=1	C4QYY2_KOMPG (+1)	71 kDa	TRUE		unknown	0	0	0	0	0	0	0	0	0	0	1	0
641	TRUE	Empty	Cluster of tr|A0A1B2JHF4|A0A1B2JHF4_PICPA-DECOY	tr|A0A1B2JHF4|A0A1B2JHF4_PICPA-DECOY	?	TRUE		unknown	0	0	0	2	2	0	0	0	2	1	1	0
641.1	TRUE	Empty	tr|A0A1B2JHF4|A0A1B2JHF4_PICPA-DECOY	tr|A0A1B2JHF4|A0A1B2JHF4_PICPA-DECOY	?	TRUE		unknown	0	0	0	2	2	0	0	0	2	1	1	0
641.2	TRUE	Empty	tr|C4R842|C4R842_KOMPG-DECOY	tr|C4R842|C4R842_KOMPG-DECOY (+1)	?	TRUE		unknown	0	0	0	2	2	0	0	0	2	1	1	0
642	TRUE	Empty	Cluster of Catalytic component of the exosome, involved in RNA processing and degradation OS=Komagataella phaffii (strain GS115 / ATCC 20864) OX=644223 GN=PAS_chr3_1042 PE=3 SV=1 (C4R6B9_KOMPG)	C4R6B9_KOMPG [2]	109 kDa	TRUE		unknown	1	0	2	0	1	2	0	0	0	1	2	0
642.1	TRUE	Empty	Catalytic component of the exosome, involved in RNA processing and degradation OS=Komagataella phaffii (strain GS115 / ATCC 20864) OX=644223 GN=PAS_chr3_1042 PE=3 SV=1	C4R6B9_KOMPG (+1)	109 kDa	TRUE		unknown	1	0	2	0	1	2	0	0	0	1	2	0
642.2	TRUE	Empty	BA75_03460T0 OS=Komagataella pastoris OX=4922 GN=DIS3 PE=3 SV=1	A0A1B2JG24_PICPA	109 kDa	TRUE		unknown	1	0	2	0	0	2	0	0	0	1	2	0
643	TRUE	Empty	Cluster of tr|C4R6Z1|C4R6Z1_KOMPG-DECOY	tr|C4R6Z1|C4R6Z1_KOMPG-DECOY [2]	?	TRUE		unknown	2	0	1	0	1	0	0	1	1	1	1	0
643.1	TRUE	Empty	tr|C4R6Z1|C4R6Z1_KOMPG-DECOY	tr|C4R6Z1|C4R6Z1_KOMPG-DECOY (+1)	?	TRUE		unknown	2	0	1	0	1	0	0	1	1	1	0	0
643.2	TRUE	Empty	tr|A0A1B2JD34|A0A1B2JD34_PICPA-DECOY	tr|A0A1B2JD34|A0A1B2JD34_PICPA-DECOY	?	TRUE		unknown	1	0	1	0	1	0	0	0	1	1	1	0
644	TRUE	Empty	Cluster of tr|C4R5E7|C4R5E7_KOMPG-DECOY	tr|C4R5E7|C4R5E7_KOMPG-DECOY [2]	?	TRUE		unknown	0	0	0	1	2	2	0	0	0	1	0	0
644.1	TRUE	Empty	tr|C4R5E7|C4R5E7_KOMPG-DECOY	tr|C4R5E7|C4R5E7_KOMPG-DECOY (+1)	?	TRUE		unknown	0	0	0	1	2	2	0	0	0	1	0	0
644.2	TRUE	Empty	tr|A0A1B2JFZ4|A0A1B2JFZ4_PICPA-DECOY	tr|A0A1B2JFZ4|A0A1B2JFZ4_PICPA-DECOY	?	TRUE		unknown	0	0	0	0	1	2	0	0	0	1	0	0
645	TRUE	Empty	Cluster of tr|A0A1B2JIK6|A0A1B2JIK6_PICPA-DECOY	tr|A0A1B2JIK6|A0A1B2JIK6_PICPA-DECOY [3]	?	TRUE		unknown	0	0	1	1	4	0	0	0	0	1	0	0
645.1	TRUE	Empty	tr|A0A1B2JIK6|A0A1B2JIK6_PICPA-DECOY	tr|A0A1B2JIK6|A0A1B2JIK6_PICPA-DECOY	?	TRUE		unknown	0	0	0	1	3	0	0	0	0	1	0	0
645.2	TRUE	Empty	tr|C4R8P7|C4R8P7_KOMPG-DECOY	tr|C4R8P7|C4R8P7_KOMPG-DECOY (+1)	?	TRUE		unknown	0	0	1	1	2	0	0	0	0	1	0	0
646	TRUE	Empty	Cluster of tr|C4QXR4|C4QXR4_KOMPG-DECOY	tr|C4QXR4|C4QXR4_KOMPG-DECOY [3]	?	TRUE		unknown	3	0	0	0	0	3	0	0	1	3	1	0
646.1	TRUE	Empty	tr|C4QXR4|C4QXR4_KOMPG-DECOY	tr|C4QXR4|C4QXR4_KOMPG-DECOY (+1)	?	TRUE		unknown	3	0	0	0	0	3	0	0	1	3	1	0
646.2	TRUE	Empty	tr|A0A1B2J971|A0A1B2J971_PICPA-DECOY	tr|A0A1B2J971|A0A1B2J971_PICPA-DECOY	?	TRUE		unknown	3	0	0	0	0	3	0	0	1	3	1	0
647	TRUE	Empty	Cluster of tr|F2QN76|F2QN76_KOMPC-DECOY	tr|F2QN76|F2QN76_KOMPC-DECOY	?	TRUE		unknown	0	0	0	0	1	3	0	0	0	5	0	0
647.1	TRUE	Empty	tr|F2QN76|F2QN76_KOMPC-DECOY	tr|F2QN76|F2QN76_KOMPC-DECOY	?	TRUE		unknown	0	0	0	0	1	3	0	0	0	5	0	0
647.2	TRUE	Empty	tr|C4QXI4|C4QXI4_KOMPG-DECOY	tr|C4QXI4|C4QXI4_KOMPG-DECOY	?	TRUE		unknown	0	0	0	0	0	0	0	0	0	0	0	0
648	TRUE	Empty	Cluster of BA75_04847T0 OS=Komagataella pastoris OX=4922 GN=CCR4 PE=4 SV=1 (A0A1B2JIQ5_PICPA)	A0A1B2JIQ5_PICPA	85 kDa	TRUE		unknown	2	0	1	0	1	1	0	0	1	2	1	0
648.1	TRUE	Empty	BA75_04847T0 OS=Komagataella pastoris OX=4922 GN=CCR4 PE=4 SV=1	A0A1B2JIQ5_PICPA	85 kDa	TRUE		unknown	1	0	0	0	0	1	0	0	1	1	1	0
648.2	TRUE	Empty	Component of the CCR4-NOT transcriptional complex OS=Komagataella phaffii (strain GS115 / ATCC 20864) OX=644223 GN=PAS_chr4_0490 PE=4 SV=1	C4R821_KOMPG	88 kDa	TRUE		unknown	1	0	1	0	1	0	0	0	1	1	1	0
649	TRUE	Empty	Cluster of BA75_03803T0 OS=Komagataella pastoris OX=4922 GN=DRS1 PE=3 SV=1 (A0A1B2JG99_PICPA)	A0A1B2JG99_PICPA	85 kDa	TRUE		unknown	0	0	0	0	3	0	0	1	0	1	0	0
649.1	TRUE	Empty	BA75_03803T0 OS=Komagataella pastoris OX=4922 GN=DRS1 PE=3 SV=1	A0A1B2JG99_PICPA	85 kDa	TRUE		unknown	0	0	0	0	3	0	0	1	0	1	0	0
649.2	TRUE	Empty	Nucleolar DEAD-box protein required for ribosome assembly and function OS=Komagataella phaffii (strain GS115 / ATCC 20864) OX=644223 GN=PAS_chr3_0738 PE=3 SV=1	C4R5F2_KOMPG (+1)	86 kDa	TRUE		unknown	0	0	0	0	3	0	0	1	0	1	0	0
650	TRUE	Empty	Cluster of tr|C4R756|C4R756_KOMPG-DECOY	tr|C4R756|C4R756_KOMPG-DECOY [3]	?	TRUE		unknown	0	0	2	0	0	0	0	0	1	2	0	0
650.1	TRUE	Empty	tr|C4R756|C4R756_KOMPG-DECOY	tr|C4R756|C4R756_KOMPG-DECOY (+1)	?	TRUE		unknown	0	0	0	0	0	0	0	0	1	2	0	0
650.2	TRUE	Empty	tr|A0A1B2JC98|A0A1B2JC98_PICPA-DECOY	tr|A0A1B2JC98|A0A1B2JC98_PICPA-DECOY	?	TRUE		unknown	0	0	2	0	0	0	0	0	0	1	0	0
651	TRUE	Empty	Cluster of BA75_04091T0 OS=Komagataella pastoris OX=4922 GN=CDC24 PE=4 SV=1 (A0A1B2JEE1_PICPA)	A0A1B2JEE1_PICPA	94 kDa	TRUE		unknown	1	0	0	0	0	1	0	0	1	2	0	0
651.1	TRUE	Empty	BA75_04091T0 OS=Komagataella pastoris OX=4922 GN=CDC24 PE=4 SV=1	A0A1B2JEE1_PICPA	94 kDa	TRUE		unknown	0	0	0	0	0	1	0	0	1	2	0	0
651.2	TRUE	Empty	Guanine nucleotide exchange factor (GEF or GDP-release factor) for Cdc42p OS=Komagataella phaffii (strain GS115 / ATCC 20864) OX=644223 GN=PAS_chr1-4_0533 PE=4 SV=1	C4QYR2_KOMPG (+1)	94 kDa	TRUE		unknown	1	0	0	0	0	0	0	0	0	1	0	0
652	TRUE	Empty	Cluster of tr|A0A1B2JCG1|A0A1B2JCG1_PICPA-DECOY	tr|A0A1B2JCG1|A0A1B2JCG1_PICPA-DECOY	?	TRUE		unknown	3	0	0	0	0	3	0	0	0	1	0	0
652.1	TRUE	Empty	tr|A0A1B2JCG1|A0A1B2JCG1_PICPA-DECOY	tr|A0A1B2JCG1|A0A1B2JCG1_PICPA-DECOY	?	TRUE		unknown	3	0	0	0	0	3	0	0	0	1	0	0
652.2	TRUE	Empty	tr|C4R2B4|C4R2B4_KOMPG-DECOY	tr|C4R2B4|C4R2B4_KOMPG-DECOY (+1)	?	TRUE		unknown	2	0	0	0	0	0	0	0	0	1	0	0
653	TRUE	Empty	Cluster of WD40 repeat-containing subunit of the Set3C histone deacetylase complex OS=Komagataella phaffii (strain GS115 / ATCC 20864) OX=644223 GN=PAS_chr1-4_0201 PE=4 SV=1 (C4QXR1_KOMPG)	C4QXR1_KOMPG [2]	59 kDa	TRUE		unknown	0	0	0	1	0	1	0	0	0	2	2	0
653.1	TRUE	Empty	WD40 repeat-containing subunit of the Set3C histone deacetylase complex OS=Komagataella phaffii (strain GS115 / ATCC 20864) OX=644223 GN=PAS_chr1-4_0201 PE=4 SV=1	C4QXR1_KOMPG (+1)	59 kDa	TRUE		unknown	0	0	0	1	0	1	0	0	0	2	2	0
653.2	TRUE	Empty	BA75_00866T0 OS=Komagataella pastoris OX=4922 GN=SIF2 PE=4 SV=1	A0A1B2J537_PICPA	59 kDa	TRUE		unknown	0	0	0	1	0	0	0	0	0	0	1	0
654	TRUE	Empty	BA75_03781T0 OS=Komagataella pastoris OX=4922 GN=ATY40_BA7503781 PE=4 SV=1	A0A1B2JF65_PICPA	149 kDa	TRUE		unknown	2	0	2	3	1	1	0	0	0	0	0	0
655	TRUE	Empty	Involved in exosome mediated 3' to 5' mRNA degradation & translation inhibition of non-poly(A) mRNAs OS=Komagataella phaffii (strain GS115 / ATCC 20864) OX=644223 GN=PAS_chr2-2_0436 PE=4 SV=1	C4R1U9_KOMPG (+1)	159 kDa	TRUE		unknown	0	0	1	0	4	0	0	0	0	1	0	0
656	TRUE	Empty	Protein involved in bud-site selection and required for axial budding pattern OS=Komagataella phaffii (strain GS115 / ATCC 20864) OX=644223 GN=PAS_chr3_0331 PE=4 SV=1	C4R483_KOMPG (+1)	163 kDa	TRUE		unknown	0	0	2	0	0	1	0	0	1	2	0	0
657	TRUE	Empty	tr|A0A1B2JDC7|A0A1B2JDC7_PICPA-DECOY	tr|A0A1B2JDC7|A0A1B2JDC7_PICPA-DECOY	?	TRUE		unknown	1	0	1	1	3	1	0	0	0	0	1	0
658	TRUE	Empty	BA75_02318T0 OS=Komagataella pastoris OX=4922 GN=OXP1 PE=3 SV=1	A0A1B2JAB0_PICPA	147 kDa	TRUE		unknown	0	0	0	0	2	3	0	0	0	2	1	0
659	TRUE	Empty	Cluster of Uncharacterized protein OS=Komagataella phaffii (strain GS115 / ATCC 20864) OX=644223 GN=PAS_chr3_0412 PE=4 SV=1 (C4R4H5_KOMPG)	C4R4H5_KOMPG [3]	111 kDa	TRUE		unknown	2	0	1	0	3	2	0	0	1	2	0	0
659.1	TRUE	Empty	Uncharacterized protein OS=Komagataella phaffii (strain GS115 / ATCC 20864) OX=644223 GN=PAS_chr3_0412 PE=4 SV=1	C4R4H5_KOMPG (+1)	111 kDa	TRUE		unknown	2	0	1	0	3	0	0	0	1	2	0	0
659.2	TRUE	Empty	BA75_00439T0 OS=Komagataella pastoris OX=4922 GN=ECM30 PE=4 SV=1	A0A1B2J9S8_PICPA	111 kDa	TRUE		unknown	2	0	1	0	2	2	0	0	0	2	0	0
660	TRUE	Empty	Cluster of tr|C4QZZ8|C4QZZ8_KOMPG-DECOY	tr|C4QZZ8|C4QZZ8_KOMPG-DECOY [2]	?	TRUE		unknown	0	0	0	0	1	2	0	0	1	1	1	0
660.1	TRUE	Empty	tr|C4QZZ8|C4QZZ8_KOMPG-DECOY	tr|C4QZZ8|C4QZZ8_KOMPG-DECOY (+1)	?	TRUE		unknown	0	0	0	0	0	2	0	0	0	1	1	0
660.2	TRUE	Empty	tr|A0A1B2JHS7|A0A1B2JHS7_PICPA-DECOY	tr|A0A1B2JHS7|A0A1B2JHS7_PICPA-DECOY	?	TRUE		unknown	0	0	0	0	1	0	0	0	1	0	1	0
661	TRUE	Empty	Cluster of tr|A0A1G4KQD9|A0A1G4KQD9_KOMPC-DECOY	tr|A0A1G4KQD9|A0A1G4KQD9_KOMPC-DECOY [2]	?	TRUE		unknown	0	0	0	0	1	0	0	0	0	2	0	0
661.1	TRUE	Empty	tr|A0A1G4KQD9|A0A1G4KQD9_KOMPC-DECOY	tr|A0A1G4KQD9|A0A1G4KQD9_KOMPC-DECOY (+1)	?	TRUE		unknown	0	0	0	0	1	0	0	0	0	2	0	0
661.2	TRUE	Empty	tr|A0A1B2JEQ5|A0A1B2JEQ5_PICPA-DECOY	tr|A0A1B2JEQ5|A0A1B2JEQ5_PICPA-DECOY	?	TRUE		unknown	0	0	0	0	1	0	0	0	0	0	0	0
662	TRUE	Empty	Cluster of tr|A0A1B2J956|A0A1B2J956_PICPA-DECOY	tr|A0A1B2J956|A0A1B2J956_PICPA-DECOY [3]	?	TRUE		unknown	3	0	1	0	1	1	0	0	1	4	0	0
662.1	TRUE	Empty	tr|A0A1B2J956|A0A1B2J956_PICPA-DECOY	tr|A0A1B2J956|A0A1B2J956_PICPA-DECOY	?	TRUE		unknown	1	0	1	0	0	0	0	0	0	3	0	0
662.2	TRUE	Empty	tr|C4QWJ7|C4QWJ7_KOMPG-DECOY	tr|C4QWJ7|C4QWJ7_KOMPG-DECOY (+1)	?	TRUE		unknown	3	0	1	0	1	1	0	0	1	3	0	0
663	TRUE	Empty	Cluster of BA75_04064T0 OS=Komagataella pastoris OX=4922 GN=STE23 PE=3 SV=1 (A0A1B2JGJ8_PICPA)	A0A1B2JGJ8_PICPA [3]	127 kDa	TRUE		unknown	0	0	0	0	2	4	0	0	1	1	1	0
663.1	TRUE	Empty	BA75_04064T0 OS=Komagataella pastoris OX=4922 GN=STE23 PE=3 SV=1	A0A1B2JGJ8_PICPA	127 kDa	TRUE		unknown	0	0	0	0	1	4	0	0	1	1	1	0
663.2	TRUE	Empty	Pro-a-factor processing enzyme OS=Komagataella phaffii (strain ATCC 76273 / CBS 7435 / CECT 11047 / NRRL Y-11430 / Wegner 21-1) OX=981350 GN=STE23 PE=3 SV=1	A0A1G4KPJ5_KOMPC (+1)	122 kDa	TRUE		unknown	0	0	0	0	2	0	0	0	1	0	1	0
664	TRUE	Empty	Cluster of tr|C4R586|C4R586_KOMPG-DECOY	tr|C4R586|C4R586_KOMPG-DECOY [3]	?	TRUE		unknown	0	0	0	0	2	2	0	0	2	5	0	0
664.1	TRUE	Empty	tr|C4R586|C4R586_KOMPG-DECOY	tr|C4R586|C4R586_KOMPG-DECOY	?	TRUE		unknown	0	0	0	0	1	2	0	0	1	4	0	0
664.2	TRUE	Empty	tr|A0A1B2JG47|A0A1B2JG47_PICPA-DECOY	tr|A0A1B2JG47|A0A1B2JG47_PICPA-DECOY	?	TRUE		unknown	0	0	0	0	2	1	0	0	1	2	0	0
664.3	TRUE	Empty	tr|F2QVQ6|F2QVQ6_KOMPC-DECOY	tr|F2QVQ6|F2QVQ6_KOMPC-DECOY	?	TRUE		unknown	0	0	0	0	2	2	0	0	1	1	0	0
665	TRUE	Empty	Cluster of tr|A0A1B2JGW2|A0A1B2JGW2_PICPA-DECOY	tr|A0A1B2JGW2|A0A1B2JGW2_PICPA-DECOY [2]	?	TRUE		unknown	1	0	0	0	1	1	0	0	1	0	2	0
665.1	TRUE	Empty	tr|A0A1B2JGW2|A0A1B2JGW2_PICPA-DECOY	tr|A0A1B2JGW2|A0A1B2JGW2_PICPA-DECOY	?	TRUE		unknown	0	0	0	0	0	0	0	0	1	0	1	0
665.2	TRUE	Empty	tr|C4R8G1|C4R8G1_KOMPG-DECOY	tr|C4R8G1|C4R8G1_KOMPG-DECOY (+1)	?	TRUE		unknown	1	0	0	0	1	1	0	0	1	0	2	0
666	TRUE	Empty	Cluster of BA75_03152T0 OS=Komagataella pastoris OX=4922 GN=NUP170 PE=3 SV=1 (A0A1B2JBC6_PICPA)	A0A1B2JBC6_PICPA [3]	162 kDa	TRUE		unknown	0	0	0	1	3	3	0	0	0	2	1	0
666.1	TRUE	Empty	BA75_03152T0 OS=Komagataella pastoris OX=4922 GN=NUP170 PE=3 SV=1	A0A1B2JBC6_PICPA	162 kDa	TRUE		unknown	0	0	0	1	2	2	0	0	0	2	1	0
666.2	TRUE	Empty	Abundant subunit of the nuclear pore complex (NPC) OS=Komagataella phaffii (strain GS115 / ATCC 20864) OX=644223 GN=PAS_chr4_0163 PE=3 SV=1	C4R714_KOMPG (+1)	162 kDa	TRUE		unknown	0	0	0	1	2	1	0	0	0	2	1	0
667	TRUE	Empty	Cluster of tr|A0A1B2JD85|A0A1B2JD85_PICPA-DECOY	tr|A0A1B2JD85|A0A1B2JD85_PICPA-DECOY [2]	?	TRUE		unknown	2	0	0	0	1	0	0	0	1	0	0	0
667.1	TRUE	Empty	tr|A0A1B2JD85|A0A1B2JD85_PICPA-DECOY	tr|A0A1B2JD85|A0A1B2JD85_PICPA-DECOY	?	TRUE		unknown	1	0	0	0	1	0	0	0	1	0	0	0
667.2	TRUE	Empty	tr|C4R169|C4R169_KOMPG-DECOY	tr|C4R169|C4R169_KOMPG-DECOY (+1)	?	TRUE		unknown	2	0	0	0	1	0	0	0	0	0	0	0
668	TRUE	Empty	Cluster of tr|C4R5L8|C4R5L8_KOMPG-DECOY	tr|C4R5L8|C4R5L8_KOMPG-DECOY [2]	?	TRUE		unknown	0	0	1	0	0	2	0	0	0	2	0	0
668.1	TRUE	Empty	tr|C4R5L8|C4R5L8_KOMPG-DECOY	tr|C4R5L8|C4R5L8_KOMPG-DECOY (+1)	?	TRUE		unknown	0	0	1	0	0	2	0	0	0	2	0	0
668.2	TRUE	Empty	tr|A0A1B2JED4|A0A1B2JED4_PICPA-DECOY	tr|A0A1B2JED4|A0A1B2JED4_PICPA-DECOY	?	TRUE		unknown	0	0	1	0	0	2	0	0	0	2	0	0
669	TRUE	Empty	Cluster of DNA-directed RNA polymerase subunit OS=Komagataella pastoris OX=4922 GN=RPO31 PE=3 SV=1 (A0A1B2JCY8_PICPA)	A0A1B2JCY8_PICPA	162 kDa	TRUE		unknown	0	0	0	0	1	3	0	0	0	3	1	0
669.1	TRUE	Empty	DNA-directed RNA polymerase subunit OS=Komagataella pastoris OX=4922 GN=RPO31 PE=3 SV=1	A0A1B2JCY8_PICPA	162 kDa	TRUE		unknown	0	0	0	0	1	2	0	0	0	3	1	0
669.2	TRUE	Empty	DNA-directed RNA polymerase subunit OS=Komagataella phaffii (strain GS115 / ATCC 20864) OX=644223 GN=PAS_chr4_0302 PE=3 SV=1	C4R7G6_KOMPG (+1)	162 kDa	TRUE		unknown	0	0	0	0	1	1	0	0	0	3	1	0
670	TRUE	Empty	Cluster of BA75_01580T0 OS=Komagataella pastoris OX=4922 GN=DEG1 PE=3 SV=1 (A0A1B2J7Z3_PICPA)	A0A1B2J7Z3_PICPA [3]	50 kDa	TRUE		unknown	2	0	0	0	0	2	0	0	2	1	0	0
670.1	TRUE	Empty	BA75_01580T0 OS=Komagataella pastoris OX=4922 GN=DEG1 PE=3 SV=1	A0A1B2J7Z3_PICPA	50 kDa	TRUE		unknown	0	0	0	0	0	1	0	0	2	1	0	0
670.2	TRUE	Empty	tRNA pseudouridine synthase OS=Komagataella phaffii (strain ATCC 76273 / CBS 7435 / CECT 11047 / NRRL Y-11430 / Wegner 21-1) OX=981350 GN=DEG1 PE=3 SV=1	A0A1G4KP40_KOMPC (+1)	50 kDa	TRUE		unknown	2	0	0	0	0	1	0	0	1	1	0	0
671	TRUE	Empty	Cluster of Plasma membrane ATP binding cassette (ABC) transporter OS=Komagataella phaffii (strain GS115 / ATCC 20864) OX=644223 GN=PAS_chr2-2_0299 PE=4 SV=1 (C4R284_KOMPG)	C4R284_KOMPG	168 kDa	TRUE		unknown	0	0	1	0	1	1	0	0	0	2	0	0
671.1	TRUE	Empty	Plasma membrane ATP binding cassette (ABC) transporter OS=Komagataella phaffii (strain GS115 / ATCC 20864) OX=644223 GN=PAS_chr2-2_0299 PE=4 SV=1	C4R284_KOMPG (+1)	168 kDa	TRUE		unknown	0	0	1	0	0	1	0	0	0	2	0	0
671.2	TRUE	Empty	BA75_02192T0 OS=Komagataella pastoris OX=4922 GN=ATY40_BA7502192 PE=4 SV=1	A0A1B2JCB8_PICPA	168 kDa	TRUE		unknown	0	0	1	0	1	1	0	0	0	2	0	0
672	TRUE	Empty	Cluster of DNA primase large subunit OS=Komagataella phaffii (strain GS115 / ATCC 20864) OX=644223 GN=PAS_chr2-1_0512 PE=3 SV=1 (C4R0X0_KOMPG)	C4R0X0_KOMPG [2]	60 kDa	TRUE		unknown	0	0	0	1	2	1	0	0	0	1	0	0
672.1	TRUE	Empty	DNA primase large subunit OS=Komagataella phaffii (strain GS115 / ATCC 20864) OX=644223 GN=PAS_chr2-1_0512 PE=3 SV=1	C4R0X0_KOMPG (+1)	60 kDa	TRUE		unknown	0	0	0	1	2	0	0	0	0	1	0	0
672.2	TRUE	Empty	DNA primase large subunit OS=Komagataella pastoris OX=4922 GN=PRI2 PE=3 SV=1	A0A1B2JD44_PICPA	60 kDa	TRUE		unknown	0	0	0	0	0	1	0	0	0	0	0	0
673	TRUE	Empty	Cluster of tr|C4R4L4|C4R4L4_KOMPG-DECOY	tr|C4R4L4|C4R4L4_KOMPG-DECOY [3]	?	TRUE		unknown	4	0	0	0	1	0	0	0	0	1	0	0
673.1	TRUE	Empty	tr|C4R4L4|C4R4L4_KOMPG-DECOY	tr|C4R4L4|C4R4L4_KOMPG-DECOY (+1)	?	TRUE		unknown	3	0	0	0	1	0	0	0	0	1	0	0
673.2	TRUE	Empty	tr|A0A1B2J5D2|A0A1B2J5D2_PICPA-DECOY	tr|A0A1B2J5D2|A0A1B2J5D2_PICPA-DECOY	?	TRUE		unknown	4	0	0	0	0	0	0	0	0	1	0	0
674	TRUE	Empty	Cluster of tr|C4R422|C4R422_KOMPG-DECOY	tr|C4R422|C4R422_KOMPG-DECOY	?	TRUE		unknown	1	0	0	0	0	4	0	0	0	5	3	0
674.1	TRUE	Empty	tr|C4R422|C4R422_KOMPG-DECOY	tr|C4R422|C4R422_KOMPG-DECOY	?	TRUE		unknown	1	0	0	0	0	3	0	0	0	4	3	0
674.2	TRUE	Empty	tr|A0A1B2J8Z8|A0A1B2J8Z8_PICPA-DECOY	tr|A0A1B2J8Z8|A0A1B2J8Z8_PICPA-DECOY	?	TRUE		unknown	0	0	0	0	0	1	0	0	0	1	0	0
674.3	TRUE	Empty	tr|F2QWX0|F2QWX0_KOMPC-DECOY	tr|F2QWX0|F2QWX0_KOMPC-DECOY	?	TRUE		unknown	0	0	0	0	0	1	0	0	0	3	0	0
675	TRUE	Empty	tr|A0A1B2JH60|A0A1B2JH60_PICPA-DECOY	tr|A0A1B2JH60|A0A1B2JH60_PICPA-DECOY	?	TRUE		unknown	1	0	0	0	2	1	0	0	0	3	0	0
676	TRUE	Empty	tr|C4R3W0|C4R3W0_KOMPG-DECOY	tr|C4R3W0|C4R3W0_KOMPG-DECOY (+1)	?	TRUE		unknown	1	0	0	0	1	4	0	0	1	1	0	0
677	TRUE	Empty	BA75_03231T0 OS=Komagataella pastoris OX=4922 GN=ATY40_BA7503231 PE=4 SV=1	A0A1B2JE31_PICPA	161 kDa	TRUE		unknown	2	0	1	0	2	1	0	0	0	0	0	0
678	TRUE	Empty	tr|A0A1B2JFS6|A0A1B2JFS6_PICPA-DECOY	tr|A0A1B2JFS6|A0A1B2JFS6_PICPA-DECOY	?	TRUE		unknown	2	0	0	1	0	3	0	0	0	2	0	0
679	TRUE	Empty	tr|C4R6U1|C4R6U1_KOMPG-DECOY	tr|C4R6U1|C4R6U1_KOMPG-DECOY (+1)	?	TRUE		unknown	1	0	0	0	2	2	0	0	2	1	0	0
680	TRUE	Empty	tr|A0A1B2JC20|A0A1B2JC20_PICPA-DECOY	tr|A0A1B2JC20|A0A1B2JC20_PICPA-DECOY	?	TRUE		unknown	1	0	5	0	3	1	0	0	0	1	0	0
681	TRUE	Empty	Cluster of tr|A0A1B2J995|A0A1B2J995_PICPA-DECOY	tr|A0A1B2J995|A0A1B2J995_PICPA-DECOY [3]	?	TRUE		unknown	1	0	1	0	2	1	0	0	1	2	1	0
681.1	TRUE	Empty	tr|A0A1B2J995|A0A1B2J995_PICPA-DECOY	tr|A0A1B2J995|A0A1B2J995_PICPA-DECOY	?	TRUE		unknown	1	0	1	0	1	1	0	0	1	2	1	0
681.2	TRUE	Empty	tr|C4QXJ7|C4QXJ7_KOMPG-DECOY	tr|C4QXJ7|C4QXJ7_KOMPG-DECOY (+1)	?	TRUE		unknown	1	0	1	0	2	1	0	0	0	1	0	0
682	TRUE	Empty	Cluster of tr|A0A1B2J7D7|A0A1B2J7D7_PICPA-DECOY	tr|A0A1B2J7D7|A0A1B2J7D7_PICPA-DECOY [3]	?	TRUE		unknown	0	0	0	1	4	1	0	0	0	2	0	0
682.1	TRUE	Empty	tr|A0A1B2J7D7|A0A1B2J7D7_PICPA-DECOY	tr|A0A1B2J7D7|A0A1B2J7D7_PICPA-DECOY (+2)	?	TRUE		unknown	0	0	0	1	4	1	0	0	0	2	0	0
682.2	TRUE	Empty	sp|Q9C124|ACEA_PICPA-DECOY	sp|Q9C124|ACEA_PICPA-DECOY	?	TRUE		unknown	0	0	0	0	3	1	0	0	0	2	0	0
683	TRUE	Empty	Cluster of tr|C4QVY8|C4QVY8_KOMPG-DECOY	tr|C4QVY8|C4QVY8_KOMPG-DECOY [2]	?	TRUE		unknown	3	0	1	0	1	1	0	0	1	1	2	0
683.1	TRUE	Empty	tr|C4QVY8|C4QVY8_KOMPG-DECOY	tr|C4QVY8|C4QVY8_KOMPG-DECOY (+1)	?	TRUE		unknown	3	0	1	0	1	1	0	0	1	1	2	0
683.2	TRUE	Empty	tr|A0A1B2J5Y1|A0A1B2J5Y1_PICPA-DECOY	tr|A0A1B2J5Y1|A0A1B2J5Y1_PICPA-DECOY	?	TRUE		unknown	3	0	1	0	0	1	0	0	0	1	2	0
684	TRUE	Empty	Cluster of BA75_02154T0 OS=Komagataella pastoris OX=4922 GN=NUP192 PE=3 SV=1 (A0A1B2JAW0_PICPA)	A0A1B2JAW0_PICPA [3]	187 kDa	TRUE		unknown	2	0	2	0	0	1	0	0	1	4	1	0
684.1	TRUE	Empty	BA75_02154T0 OS=Komagataella pastoris OX=4922 GN=NUP192 PE=3 SV=1	A0A1B2JAW0_PICPA	187 kDa	TRUE		unknown	2	0	1	0	0	0	0	0	0	2	1	0
684.2	TRUE	Empty	Essential structural subunit of the nuclear pore complex (NPC) OS=Komagataella phaffii (strain GS115 / ATCC 20864) OX=644223 GN=PAS_chr2-2_0270 PE=3 SV=1	C4R2C0_KOMPG (+1)	187 kDa	TRUE		unknown	1	0	1	0	0	1	0	0	1	3	0	0
685	TRUE	Empty	Cluster of tr|A0A1B2JC47|A0A1B2JC47_PICPA-DECOY	tr|A0A1B2JC47|A0A1B2JC47_PICPA-DECOY	?	TRUE		unknown	0	0	0	1	2	0	0	0	0	1	1	0
685.1	TRUE	Empty	tr|A0A1B2JC47|A0A1B2JC47_PICPA-DECOY	tr|A0A1B2JC47|A0A1B2JC47_PICPA-DECOY	?	TRUE		unknown	0	0	0	1	2	0	0	0	0	1	1	0
685.2	TRUE	Empty	tr|C4R6Z2|C4R6Z2_KOMPG-DECOY	tr|C4R6Z2|C4R6Z2_KOMPG-DECOY (+1)	?	TRUE		unknown	0	0	0	1	0	0	0	0	0	0	0	0
686	TRUE	Empty	Cluster of tr|C4R4M2|C4R4M2_KOMPG-DECOY	tr|C4R4M2|C4R4M2_KOMPG-DECOY	?	TRUE		unknown	1	0	2	1	2	0	0	0	0	1	0	0
686.1	TRUE	Empty	tr|C4R4M2|C4R4M2_KOMPG-DECOY	tr|C4R4M2|C4R4M2_KOMPG-DECOY (+1)	?	TRUE		unknown	1	0	2	1	1	0	0	0	0	0	0	0
686.2	TRUE	Empty	tr|A0A1B2J8W0|A0A1B2J8W0_PICPA-DECOY	tr|A0A1B2J8W0|A0A1B2J8W0_PICPA-DECOY	?	TRUE		unknown	1	0	0	1	2	0	0	0	0	1	0	0
687	TRUE	Empty	Cluster of tr|A0A1B2J8N7|A0A1B2J8N7_PICPA-DECOY	tr|A0A1B2J8N7|A0A1B2J8N7_PICPA-DECOY	?	TRUE		unknown	3	0	0	0	3	0	0	1	1	1	0	0
687.1	TRUE	Empty	tr|A0A1B2J8N7|A0A1B2J8N7_PICPA-DECOY	tr|A0A1B2J8N7|A0A1B2J8N7_PICPA-DECOY	?	TRUE		unknown	3	0	0	0	3	0	0	1	0	1	0	0
687.2	TRUE	Empty	tr|C4QWC1|C4QWC1_KOMPG-DECOY	tr|C4QWC1|C4QWC1_KOMPG-DECOY (+1)	?	TRUE		unknown	1	0	0	0	0	0	0	0	1	0	0	0
688	TRUE	Empty	Cluster of tr|C4R3Q6|C4R3Q6_KOMPG-DECOY	tr|C4R3Q6|C4R3Q6_KOMPG-DECOY	?	TRUE		unknown	0	0	0	0	2	0	0	0	1	2	1	0
688.1	TRUE	Empty	tr|C4R3Q6|C4R3Q6_KOMPG-DECOY	tr|C4R3Q6|C4R3Q6_KOMPG-DECOY	?	TRUE		unknown	0	0	0	0	0	0	0	0	0	1	1	0
688.2	TRUE	Empty	tr|A0A1B2J5C8|A0A1B2J5C8_PICPA-DECOY	tr|A0A1B2J5C8|A0A1B2J5C8_PICPA-DECOY	?	TRUE		unknown	0	0	0	0	2	0	0	0	1	1	0	0
689	TRUE	Empty	Cluster of BA75_00038T0 OS=Komagataella pastoris OX=4922 GN=ELG1 PE=4 SV=1 (A0A1B2J5Z7_PICPA)	A0A1B2J5Z7_PICPA	83 kDa	TRUE		unknown	0	0	2	0	0	0	0	0	0	0	1	0
689.1	TRUE	Empty	BA75_00038T0 OS=Komagataella pastoris OX=4922 GN=ELG1 PE=4 SV=1	A0A1B2J5Z7_PICPA	83 kDa	TRUE		unknown	0	0	2	0	0	0	0	0	0	0	0	0
689.2	TRUE	Empty	Protein required for S phase progression and telomere homeostasis, forms an alternative replication OS=Komagataella phaffii (strain GS115 / ATCC 20864) OX=644223 GN=PAS_chr3_0046 PE=3 SV=1	C4R3D9_KOMPG (+1)	83 kDa	TRUE		unknown	0	0	2	0	0	0	0	0	0	0	1	0
690	TRUE	Empty	Cluster of tr|C4QX33|C4QX33_KOMPG-DECOY	tr|C4QX33|C4QX33_KOMPG-DECOY [3]	?	TRUE		unknown	1	0	0	0	4	0	0	0	0	0	0	0
690.1	TRUE	Empty	tr|C4QX33|C4QX33_KOMPG-DECOY	tr|C4QX33|C4QX33_KOMPG-DECOY (+1)	?	TRUE		unknown	1	0	0	0	3	0	0	0	0	0	0	0
690.2	TRUE	Empty	tr|A0A1B2J7D5|A0A1B2J7D5_PICPA-DECOY	tr|A0A1B2J7D5|A0A1B2J7D5_PICPA-DECOY	?	TRUE		unknown	1	0	0	0	3	0	0	0	0	0	0	0
691	TRUE	Empty	Cluster of Kinesin-like protein OS=Komagataella phaffii (strain GS115 / ATCC 20864) OX=644223 GN=PAS_chr2-1_0247 PE=3 SV=1 (C4R035_KOMPG)	C4R035_KOMPG	66 kDa	TRUE		unknown	1	0	0	0	1	1	0	0	0	2	0	0
691.1	TRUE	Empty	Kinesin-like protein OS=Komagataella phaffii (strain GS115 / ATCC 20864) OX=644223 GN=PAS_chr2-1_0247 PE=3 SV=1	C4R035_KOMPG (+1)	66 kDa	TRUE		unknown	0	0	0	0	0	0	0	0	0	1	0	0
691.2	TRUE	Empty	Kinesin-like protein OS=Komagataella pastoris OX=4922 GN=ATY40_BA7505014 PE=3 SV=1	A0A1B2JI74_PICPA	66 kDa	TRUE		unknown	1	0	0	0	1	1	0	0	0	1	0	0
692	TRUE	Empty	Cluster of tr|A0A1B2J5D5|A0A1B2J5D5_PICPA-DECOY	tr|A0A1B2J5D5|A0A1B2J5D5_PICPA-DECOY	?	TRUE		unknown	1	0	0	0	0	0	0	0	2	1	1	0
692.1	TRUE	Empty	tr|A0A1B2J5D5|A0A1B2J5D5_PICPA-DECOY	tr|A0A1B2J5D5|A0A1B2J5D5_PICPA-DECOY	?	TRUE		unknown	1	0	0	0	0	0	0	0	2	1	0	0
692.2	TRUE	Empty	tr|C4QVR0|C4QVR0_KOMPG-DECOY	tr|C4QVR0|C4QVR0_KOMPG-DECOY (+1)	?	TRUE		unknown	0	0	0	0	0	0	0	0	1	0	1	0
693	TRUE	Empty	tr|A0A1B2JHP9|A0A1B2JHP9_PICPA-DECOY	tr|A0A1B2JHP9|A0A1B2JHP9_PICPA-DECOY	?	TRUE		unknown	1	0	0	0	1	2	0	0	1	4	0	0
694	TRUE	Empty	Inner capsid protein VP2 OS=Human rotavirus A OX=10941 GN=VP2 PE=3 SV=1	A0A0S2MTJ4_9VIRU	104 kDa			unknown	1	0	1	0	1	2	0	0	0	1	1	0
695	TRUE	Empty	tr|C4R5N3|C4R5N3_KOMPG-DECOY	tr|C4R5N3|C4R5N3_KOMPG-DECOY (+1)	?	TRUE		unknown	3	0	0	0	0	1	0	0	0	2	1	0
696	TRUE	Empty	BA75_03448T0 OS=Komagataella pastoris OX=4922 GN=FMP27 PE=4 SV=1	A0A1B2JFJ5_PICPA	295 kDa	TRUE		unknown	0	0	0	0	1	1	0	1	0	2	0	0
697	TRUE	Empty	HIR complex subunit OS=Komagataella phaffii (strain ATCC 76273 / CBS 7435 / CECT 11047 / NRRL Y-11430 / Wegner 21-1) OX=981350 GN=HIR3 PE=3 SV=1	F2QRY1_KOMPC	198 kDa	TRUE		unknown	0	0	0	0	0	1	0	0	0	0	3	0
698	TRUE	Empty	tr|C4QYH0|C4QYH0_KOMPG-DECOY	tr|C4QYH0|C4QYH0_KOMPG-DECOY	?	TRUE		unknown	0	0	0	0	3	2	0	0	0	1	0	0
699	TRUE	Empty	Cluster of tr|C4QV36|C4QV36_KOMPG-DECOY	tr|C4QV36|C4QV36_KOMPG-DECOY	?	TRUE		unknown	1	0	1	0	2	0	0	0	1	2	0	0
699.1	TRUE	Empty	tr|C4QV36|C4QV36_KOMPG-DECOY	tr|C4QV36|C4QV36_KOMPG-DECOY (+1)	?	TRUE		unknown	1	0	1	0	2	0	0	0	0	2	0	0
699.2	TRUE	Empty	tr|A0A1B2J9T3|A0A1B2J9T3_PICPA-DECOY	tr|A0A1B2J9T3|A0A1B2J9T3_PICPA-DECOY	?	TRUE		unknown	1	0	1	0	2	0	0	0	1	2	0	0
700	TRUE	Empty	Cluster of Uncharacterized protein OS=Komagataella phaffii (strain GS115 / ATCC 20864) OX=644223 GN=PAS_FragB_0074 PE=4 SV=1 (C4QZ95_KOMPG)	C4QZ95_KOMPG [3]	45 kDa	TRUE		unknown	1	0	0	1	2	1	0	0	1	3	0	0
700.1	TRUE	Empty	Uncharacterized protein OS=Komagataella phaffii (strain GS115 / ATCC 20864) OX=644223 GN=PAS_FragB_0074 PE=4 SV=1	C4QZ95_KOMPG (+1)	45 kDa	TRUE		unknown	1	0	0	1	2	1	0	0	1	2	0	0
700.2	TRUE	Empty	BA75_04281T0 OS=Komagataella pastoris OX=4922 GN=SPG5 PE=4 SV=1	A0A1B2JGA5_PICPA	45 kDa	TRUE		unknown	0	0	0	1	2	1	0	0	1	2	0	0
701	TRUE	Empty	Cluster of tr|C4QV48|C4QV48_KOMPG-DECOY	tr|C4QV48|C4QV48_KOMPG-DECOY [2]	?	TRUE		unknown	4	0	2	0	0	2	0	1	2	1	2	1
701.1	TRUE	Empty	tr|C4QV48|C4QV48_KOMPG-DECOY	tr|C4QV48|C4QV48_KOMPG-DECOY (+1)	?	TRUE		unknown	4	0	2	0	0	2	0	1	2	1	2	1
701.2	TRUE	Empty	tr|A0A1B2J8D9|A0A1B2J8D9_PICPA-DECOY	tr|A0A1B2J8D9|A0A1B2J8D9_PICPA-DECOY	?	TRUE		unknown	3	0	1	0	0	2	0	1	2	1	2	1
702	TRUE	Empty	Cluster of tr|A0A1B2J9H5|A0A1B2J9H5_PICPA-DECOY	tr|A0A1B2J9H5|A0A1B2J9H5_PICPA-DECOY	?	TRUE		unknown	1	0	1	0	1	1	0	1	0	2	1	0
702.1	TRUE	Empty	tr|A0A1B2J9H5|A0A1B2J9H5_PICPA-DECOY	tr|A0A1B2J9H5|A0A1B2J9H5_PICPA-DECOY	?	TRUE		unknown	1	0	1	0	1	0	0	0	0	2	0	0
702.2	TRUE	Empty	tr|I6LAD0|I6LAD0_PICPA-DECOY	tr|I6LAD0|I6LAD0_PICPA-DECOY	?	TRUE		unknown	1	0	1	0	0	1	0	1	0	1	1	0
702.3	TRUE	Empty	tr|C4QV78|C4QV78_KOMPG-DECOY	tr|C4QV78|C4QV78_KOMPG-DECOY (+1)	?	TRUE		unknown	0	0	0	0	0	0	0	0	0	0	0	0
703	TRUE	Empty	Cluster of BA75_03874T0 OS=Komagataella pastoris OX=4922 GN=DHR2 PE=4 SV=1 (A0A1B2JH48_PICPA)	A0A1B2JH48_PICPA [2]	94 kDa	TRUE		unknown	0	0	1	1	3	0	0	0	0	0	0	0
703.1	TRUE	Empty	BA75_03874T0 OS=Komagataella pastoris OX=4922 GN=DHR2 PE=4 SV=1	A0A1B2JH48_PICPA	94 kDa	TRUE		unknown	0	0	1	1	2	0	0	0	0	0	0	0
703.2	TRUE	Empty	Predominantly nucleolar DEAH-box ATP-dependent RNA helicase, required for 18S rRNA synthesis OS=Komagataella phaffii (strain GS115 / ATCC 20864) OX=644223 GN=PAS_chr3_0672 PE=4 SV=1	C4R584_KOMPG (+1)	93 kDa	TRUE		unknown	0	0	0	0	3	0	0	0	0	0	0	0
704	TRUE	Empty	Cluster of Nuclear pore subcomplexes subunit OS=Komagataella phaffii (strain ATCC 76273 / CBS 7435 / CECT 11047 / NRRL Y-11430 / Wegner 21-1) OX=981350 GN=NUP145 PE=4 SV=1 (F2QRS0_KOMPC)	F2QRS0_KOMPC	136 kDa	TRUE		unknown	1	0	0	0	3	1	0	0	0	3	0	0
704.1	TRUE	Empty	Nuclear pore subcomplexes subunit OS=Komagataella phaffii (strain ATCC 76273 / CBS 7435 / CECT 11047 / NRRL Y-11430 / Wegner 21-1) OX=981350 GN=NUP145 PE=4 SV=1	F2QRS0_KOMPC	136 kDa	TRUE		unknown	1	0	0	0	3	1	0	0	0	3	0	0
704.2	TRUE	Empty	Essential nucleoporin OS=Komagataella phaffii (strain GS115 / ATCC 20864) OX=644223 GN=PAS_chr2-2_0385 PE=4 SV=1	C4R1Z6_KOMPG	138 kDa	TRUE		unknown	0	0	0	0	3	1	0	0	0	3	0	0
705	TRUE	Empty	Cluster of tr|C4R325|C4R325_KOMPG-DECOY	tr|C4R325|C4R325_KOMPG-DECOY	?	TRUE		unknown	1	0	0	0	7	1	0	1	0	1	0	0
705.1	TRUE	Empty	tr|C4R325|C4R325_KOMPG-DECOY	tr|C4R325|C4R325_KOMPG-DECOY	?	TRUE		unknown	1	0	0	0	7	1	0	1	0	1	0	0
705.2	TRUE	Empty	tr|F2QQQ5|F2QQQ5_KOMPC-DECOY	tr|F2QQQ5|F2QQQ5_KOMPC-DECOY	?	TRUE		unknown	1	0	0	0	7	1	0	1	0	1	0	0
706	TRUE	Empty	Cluster of tr|A0A1B2J536|A0A1B2J536_PICPA-DECOY	tr|A0A1B2J536|A0A1B2J536_PICPA-DECOY	?	TRUE		unknown	1	0	1	0	1	0	0	0	0	2	0	0
706.1	TRUE	Empty	tr|A0A1B2J536|A0A1B2J536_PICPA-DECOY	tr|A0A1B2J536|A0A1B2J536_PICPA-DECOY	?	TRUE		unknown	0	0	1	0	1	0	0	0	0	1	0	0
706.2	TRUE	Empty	tr|C4QWF2|C4QWF2_KOMPG-DECOY	tr|C4QWF2|C4QWF2_KOMPG-DECOY (+1)	?	TRUE		unknown	1	0	0	0	1	0	0	0	0	1	0	0
707	TRUE	Empty	Cluster of BA75_03961T0 OS=Komagataella pastoris OX=4922 GN=SLM1 PE=4 SV=1 (A0A1B2JGP9_PICPA)	A0A1B2JGP9_PICPA [3]	77 kDa	TRUE		unknown	0	0	2	2	3	0	0	0	0	2	2	0
707.1	TRUE	Empty	BA75_03961T0 OS=Komagataella pastoris OX=4922 GN=SLM1 PE=4 SV=1	A0A1B2JGP9_PICPA	77 kDa	TRUE		unknown	0	0	1	1	3	0	0	0	0	1	2	0
707.2	TRUE	Empty	Phosphoinositide PI4,5P(2) binding protein OS=Komagataella phaffii (strain ATCC 76273 / CBS 7435 / CECT 11047 / NRRL Y-11430 / Wegner 21-1) OX=981350 GN=SLM1 PE=4 SV=1	A0A1G4KPJ2_KOMPC (+1)	77 kDa	TRUE		unknown	0	0	1	1	2	0	0	0	0	2	0	0
708	TRUE	Empty	Cluster of tr|C4R926|C4R926_KOMPG-DECOY	tr|C4R926|C4R926_KOMPG-DECOY [3]	?	TRUE		unknown	1	0	1	0	0	3	0	0	1	3	0	0
708.1	TRUE	Empty	tr|C4R926|C4R926_KOMPG-DECOY	tr|C4R926|C4R926_KOMPG-DECOY (+1)	?	TRUE		unknown	1	0	1	0	0	3	0	0	1	2	0	0
708.2	TRUE	Empty	tr|A0A1B2JH71|A0A1B2JH71_PICPA-DECOY	tr|A0A1B2JH71|A0A1B2JH71_PICPA-DECOY	?	TRUE		unknown	1	0	1	0	0	2	0	0	1	3	0	0
709	TRUE	Empty	Cluster of Kinetochore protein NDC80 OS=Komagataella pastoris OX=4922 GN=TID3 PE=3 SV=1 (A0A1B2J9P8_PICPA)	A0A1B2J9P8_PICPA [2]	79 kDa	TRUE		unknown	0	0	0	2	3	2	0	0	1	1	0	0
709.1	TRUE	Empty	Kinetochore protein NDC80 OS=Komagataella pastoris OX=4922 GN=TID3 PE=3 SV=1	A0A1B2J9P8_PICPA	79 kDa	TRUE		unknown	0	0	0	2	1	1	0	0	1	0	0	0
709.2	TRUE	Empty	Kinetochore protein NDC80 OS=Komagataella phaffii (strain ATCC 76273 / CBS 7435 / CECT 11047 / NRRL Y-11430 / Wegner 21-1) OX=981350 GN=NDC80 PE=3 SV=1	F2QLM0_KOMPC	79 kDa	TRUE		unknown	0	0	0	1	3	1	0	0	1	1	0	0
710	TRUE	Empty	Cluster of ATP-dependent RNA helicase OS=Komagataella phaffii (strain GS115 / ATCC 20864) OX=644223 GN=PAS_chr4_0231 PE=3 SV=1 (C4R787_KOMPG)	C4R787_KOMPG [3]	87 kDa	TRUE		unknown	2	0	0	0	2	2	0	0	0	0	2	0
710.1	TRUE	Empty	ATP-dependent RNA helicase OS=Komagataella phaffii (strain GS115 / ATCC 20864) OX=644223 GN=PAS_chr4_0231 PE=3 SV=1	C4R787_KOMPG (+1)	87 kDa	TRUE		unknown	1	0	0	0	2	2	0	0	0	0	2	0
710.2	TRUE	Empty	ATP-dependent RNA helicase OS=Komagataella pastoris OX=4922 GN=HCA4 PE=3 SV=1	A0A1B2JBY4_PICPA	87 kDa	TRUE		unknown	2	0	0	0	2	1	0	0	0	0	2	0
711	TRUE	Empty	Cluster of tr|A0A1B2J5X6|A0A1B2J5X6_PICPA-DECOY	tr|A0A1B2J5X6|A0A1B2J5X6_PICPA-DECOY [2]	?	TRUE		unknown	0	0	0	0	0	1	0	0	1	2	4	0
711.1	TRUE	Empty	tr|A0A1B2J5X6|A0A1B2J5X6_PICPA-DECOY	tr|A0A1B2J5X6|A0A1B2J5X6_PICPA-DECOY	?	TRUE		unknown	0	0	0	0	0	0	0	0	1	2	3	0
711.2	TRUE	Empty	tr|C4R3Z3|C4R3Z3_KOMPG-DECOY	tr|C4R3Z3|C4R3Z3_KOMPG-DECOY	?	TRUE		unknown	0	0	0	0	0	1	0	0	1	2	1	0
711.3	TRUE	Empty	tr|F2QWZ8|F2QWZ8_KOMPC-DECOY	tr|F2QWZ8|F2QWZ8_KOMPC-DECOY	?	TRUE		unknown	0	0	0	0	0	0	0	0	1	2	2	0
712	TRUE	Empty	Cluster of tr|F2QW98|F2QW98_KOMPC-DECOY	tr|F2QW98|F2QW98_KOMPC-DECOY	?	TRUE		unknown	2	0	1	0	0	1	0	0	0	1	2	0
712.1	TRUE	Empty	tr|F2QW98|F2QW98_KOMPC-DECOY	tr|F2QW98|F2QW98_KOMPC-DECOY	?	TRUE		unknown	2	0	1	0	0	1	0	0	0	0	1	0
712.2	TRUE	Empty	tr|A0A1B2J9M0|A0A1B2J9M0_PICPA-DECOY	tr|A0A1B2J9M0|A0A1B2J9M0_PICPA-DECOY	?	TRUE		unknown	2	0	1	0	0	1	0	0	0	1	1	0
713	TRUE	Empty	Cluster of tr|A0A1B2JDZ0|A0A1B2JDZ0_PICPA-DECOY	tr|A0A1B2JDZ0|A0A1B2JDZ0_PICPA-DECOY	?	TRUE		unknown	0	0	0	1	1	2	0	0	0	1	0	0
713.1	TRUE	Empty	tr|A0A1B2JDZ0|A0A1B2JDZ0_PICPA-DECOY	tr|A0A1B2JDZ0|A0A1B2JDZ0_PICPA-DECOY	?	TRUE		unknown	0	0	0	1	1	2	0	0	0	0	0	0
713.2	TRUE	Empty	tr|C4R5A7|C4R5A7_KOMPG-DECOY	tr|C4R5A7|C4R5A7_KOMPG-DECOY (+1)	?	TRUE		unknown	0	0	0	1	1	1	0	0	0	1	0	0
714	TRUE	Empty	Cluster of CTD kinase subunit beta OS=Komagataella phaffii (strain ATCC 76273 / CBS 7435 / CECT 11047 / NRRL Y-11430 / Wegner 21-1) OX=981350 GN=CTK2 PE=3 SV=2 (F2QYB7_KOMPC)	F2QYB7_KOMPC [2]	40 kDa	TRUE		unknown	0	0	0	2	2	0	0	0	1	0	0	0
714.1	TRUE	Empty	CTD kinase subunit beta OS=Komagataella phaffii (strain ATCC 76273 / CBS 7435 / CECT 11047 / NRRL Y-11430 / Wegner 21-1) OX=981350 GN=CTK2 PE=3 SV=2	F2QYB7_KOMPC	40 kDa	TRUE		unknown	0	0	0	1	2	0	0	0	0	0	0	0
714.2	TRUE	Empty	BA75_04574T0 OS=Komagataella pastoris OX=4922 GN=CTK2 PE=3 SV=1	A0A1B2JIL7_PICPA	44 kDa	TRUE		unknown	0	0	0	2	1	0	0	0	1	0	0	0
715	TRUE	Empty	Cluster of tr|A0A1G4KQX6|A0A1G4KQX6_KOMPC-DECOY	tr|A0A1G4KQX6|A0A1G4KQX6_KOMPC-DECOY	?	TRUE		unknown	0	0	2	0	4	0	0	0	1	1	0	0
715.1	TRUE	Empty	tr|A0A1G4KQX6|A0A1G4KQX6_KOMPC-DECOY	tr|A0A1G4KQX6|A0A1G4KQX6_KOMPC-DECOY (+1)	?	TRUE		unknown	0	0	1	0	2	0	0	0	0	0	0	0
715.2	TRUE	Empty	tr|A0A1B2JC23|A0A1B2JC23_PICPA-DECOY	tr|A0A1B2JC23|A0A1B2JC23_PICPA-DECOY	?	TRUE		unknown	0	0	2	0	4	0	0	0	1	1	0	0
716	TRUE	Empty	separase OS=Komagataella pastoris OX=4922 GN=ESP1 PE=4 SV=1	A0A1B2JF13_PICPA	192 kDa	TRUE		unknown	1	0	0	0	1	1	0	0	1	4	0	0
717	TRUE	Empty	tr|A0A1B2J9F1|A0A1B2J9F1_PICPA-DECOY	tr|A0A1B2J9F1|A0A1B2J9F1_PICPA-DECOY	?	TRUE		unknown	2	0	1	0	3	0	0	1	0	0	0	0
718	TRUE	Empty	tRNA wybutosine-synthesizing protein 4 OS=Komagataella pastoris OX=4922 GN=PPM2 PE=4 SV=1	A0A1B2JGQ0_PICPA	75 kDa	TRUE		unknown	2	0	1	0	1	0	0	0	0	2	0	0
719	TRUE	Empty	BA75_02201T0 OS=Komagataella pastoris OX=4922 GN=ATY40_BA7502201 PE=4 SV=1	A0A1B2JBV2_PICPA	103 kDa	TRUE		unknown	0	0	2	0	2	0	0	0	1	2	0	0
720	TRUE	Empty	tr|C4R198|C4R198_KOMPG-DECOY	tr|C4R198|C4R198_KOMPG-DECOY (+1)	?			unknown	0	0	0	1	2	0	0	0	0	1	0	0
721	TRUE	Empty	Cluster of Uncharacterized protein OS=Komagataella phaffii (strain GS115 / ATCC 20864) OX=644223 GN=PAS_chr2-2_0156 PE=4 SV=1 (C4R2P7_KOMPG)	C4R2P7_KOMPG	40 kDa	TRUE		unknown	0	0	2	0	0	2	0	0	0	0	0	0
721.1	TRUE	Empty	Uncharacterized protein OS=Komagataella phaffii (strain GS115 / ATCC 20864) OX=644223 GN=PAS_chr2-2_0156 PE=4 SV=1	C4R2P7_KOMPG (+1)	40 kDa	TRUE		unknown	0	0	1	0	0	1	0	0	0	0	0	0
721.2	TRUE	Empty	BA75_02029T0 OS=Komagataella pastoris OX=4922 GN=STB1 PE=4 SV=1	A0A1B2JBB6_PICPA	40 kDa	TRUE		unknown	0	0	1	0	0	2	0	0	0	0	0	0
722	TRUE	Empty	Cluster of cysteine--tRNA ligase OS=Komagataella pastoris OX=4922 GN=YNL247W PE=3 SV=1 (A0A1B2JGH1_PICPA)	A0A1B2JGH1_PICPA	92 kDa	TRUE		unknown	1	0	2	0	1	1	0	0	0	0	0	0
722.1	TRUE	Empty	cysteine--tRNA ligase OS=Komagataella pastoris OX=4922 GN=YNL247W PE=3 SV=1	A0A1B2JGH1_PICPA	92 kDa	TRUE		unknown	0	0	1	0	1	0	0	0	0	0	0	0
722.2	TRUE	Empty	cysteine--tRNA ligase OS=Komagataella phaffii (strain GS115 / ATCC 20864) OX=644223 GN=PAS_chr1-4_0514 PE=3 SV=1	C4QYP2_KOMPG	88 kDa	TRUE		unknown	1	0	2	0	0	1	0	0	0	0	0	0
722.3	TRUE	Empty	cysteine--tRNA ligase OS=Komagataella phaffii (strain ATCC 76273 / CBS 7435 / CECT 11047 / NRRL Y-11430 / Wegner 21-1) OX=981350 GN=PP7435_Chr1-1314 PE=3 SV=1	F2QPV5_KOMPC	85 kDa	TRUE		unknown	1	0	1	0	0	1	0	0	0	0	0	0
723	TRUE	Empty	Cluster of Translational elongation factor 3, stimulates the binding of aminoacyl-tRNA (AA-tRNA) to ribosomes OS=Komagataella phaffii (strain GS115 / ATCC 20864) OX=644223 GN=PAS_chr4_0038 PE=3 SV=1 (C4R6N9_KOMPG)	C4R6N9_KOMPG [2]	117 kDa	TRUE		unknown	5	0	0	0	3	0	0	0	1	4	2	0
723.1	TRUE	Empty	Translational elongation factor 3, stimulates the binding of aminoacyl-tRNA (AA-tRNA) to ribosomes OS=Komagataella phaffii (strain GS115 / ATCC 20864) OX=644223 GN=PAS_chr4_0038 PE=3 SV=1	C4R6N9_KOMPG (+1)	117 kDa	TRUE		unknown	5	0	0	0	3	0	0	0	1	4	2	0
723.2	TRUE	Empty	BA75_03282T0 OS=Komagataella pastoris OX=4922 GN=YEF3 PE=3 SV=1	A0A1B2JEB1_PICPA	117 kDa	TRUE		unknown	5	0	0	0	2	0	0	0	1	4	2	0
723.3	TRUE	Empty	Elongation factor 3 (Fragment) OS=Komagataella pastoris OX=4922 GN=EF-3 PE=4 SV=1	O93813_PICPA	57 kDa	TRUE		unknown	3	0	0	0	0	0	0	0	0	3	1	0
724	TRUE	Empty	Cluster of tr|F2QPT8|F2QPT8_KOMPC-DECOY	tr|F2QPT8|F2QPT8_KOMPC-DECOY	?	TRUE		unknown	2	0	0	0	0	6	0	0	0	2	2	0
724.1	TRUE	Empty	tr|F2QPT8|F2QPT8_KOMPC-DECOY	tr|F2QPT8|F2QPT8_KOMPC-DECOY	?	TRUE		unknown	2	0	0	0	0	6	0	0	0	2	2	0
724.2	TRUE	Empty	tr|A0A1B2JHB4|A0A1B2JHB4_PICPA-DECOY	tr|A0A1B2JHB4|A0A1B2JHB4_PICPA-DECOY	?	TRUE		unknown	1	0	0	0	0	1	0	0	0	2	0	0
725	TRUE	Empty	Cluster of tr|A0A1B2J5W7|A0A1B2J5W7_PICPA-DECOY	tr|A0A1B2J5W7|A0A1B2J5W7_PICPA-DECOY [3]	?	TRUE		unknown	0	0	2	0	0	4	0	0	1	2	0	0
725.1	TRUE	Empty	tr|A0A1B2J5W7|A0A1B2J5W7_PICPA-DECOY	tr|A0A1B2J5W7|A0A1B2J5W7_PICPA-DECOY	?	TRUE		unknown	0	0	2	0	0	4	0	0	1	1	0	0
725.2	TRUE	Empty	tr|C4QWN3|C4QWN3_KOMPG-DECOY	tr|C4QWN3|C4QWN3_KOMPG-DECOY (+1)	?	TRUE		unknown	0	0	2	0	0	4	0	0	1	2	0	0
726	TRUE	Empty	Cluster of Major of three pyruvate decarboxylase isozymes OS=Komagataella phaffii (strain GS115 / ATCC 20864) OX=644223 GN=PAS_chr3_0188 PE=3 SV=1 (C4R3T2_KOMPG)	C4R3T2_KOMPG [3]	61 kDa	TRUE		unknown	0	2	0	0	2	1	0	2	4	4	0	1
726.1	TRUE	Empty	Major of three pyruvate decarboxylase isozymes OS=Komagataella phaffii (strain GS115 / ATCC 20864) OX=644223 GN=PAS_chr3_0188 PE=3 SV=1	C4R3T2_KOMPG (+1)	61 kDa	TRUE		unknown	0	2	0	0	1	1	0	2	4	4	0	1
726.2	TRUE	Empty	BA75_00188T0 OS=Komagataella pastoris OX=4922 GN=PDC1 PE=3 SV=1	A0A1B2J9P5_PICPA	61 kDa	TRUE		unknown	0	2	0	0	1	0	0	1	3	3	0	1
727	TRUE	Empty	Cluster of tr|A0A1B2J694|A0A1B2J694_PICPA-DECOY	tr|A0A1B2J694|A0A1B2J694_PICPA-DECOY [3]	?	TRUE		unknown	0	0	0	0	2	1	1	0	0	3	0	0
727.1	TRUE	Empty	tr|A0A1B2J694|A0A1B2J694_PICPA-DECOY	tr|A0A1B2J694|A0A1B2J694_PICPA-DECOY	?	TRUE		unknown	0	0	0	0	2	1	1	0	0	2	0	0
727.2	TRUE	Empty	tr|C4QWT6|C4QWT6_KOMPG-DECOY	tr|C4QWT6|C4QWT6_KOMPG-DECOY (+1)	?	TRUE		unknown	0	0	0	0	0	1	0	0	0	3	0	0
728	TRUE	Empty	Cluster of tr|A0A1B2JFG0|A0A1B2JFG0_PICPA-DECOY	tr|A0A1B2JFG0|A0A1B2JFG0_PICPA-DECOY	?	TRUE		unknown	2	0	1	0	0	2	0	1	0	1	3	0
728.1	TRUE	Empty	tr|A0A1B2JFG0|A0A1B2JFG0_PICPA-DECOY	tr|A0A1B2JFG0|A0A1B2JFG0_PICPA-DECOY	?	TRUE		unknown	2	0	1	0	0	2	0	1	0	1	3	0
728.2	TRUE	Empty	tr|C4R6H5|C4R6H5_KOMPG-DECOY	tr|C4R6H5|C4R6H5_KOMPG-DECOY	?	TRUE		unknown	0	0	1	0	0	0	0	0	0	0	0	0
729	TRUE	Empty	Cluster of tr|A0A1B2J7V0|A0A1B2J7V0_PICPA-DECOY	tr|A0A1B2J7V0|A0A1B2J7V0_PICPA-DECOY	?	TRUE		unknown	3	0	0	0	0	1	0	0	0	0	0	0
729.1	TRUE	Empty	tr|A0A1B2J7V0|A0A1B2J7V0_PICPA-DECOY	tr|A0A1B2J7V0|A0A1B2J7V0_PICPA-DECOY	?	TRUE		unknown	3	0	0	0	0	1	0	0	0	0	0	0
729.2	TRUE	Empty	tr|C4R453|C4R453_KOMPG-DECOY	tr|C4R453|C4R453_KOMPG-DECOY (+1)	?	TRUE		unknown	3	0	0	0	0	1	0	0	0	0	0	0
730	TRUE	Empty	Cluster of RNA helicase OS=Komagataella phaffii (strain GS115 / ATCC 20864) OX=644223 GN=PAS_chr3_0818 PE=3 SV=1 (C4R5N5_KOMPG)	C4R5N5_KOMPG [2]	61 kDa	TRUE		unknown	0	0	2	0	0	1	0	0	0	0	1	0
730.1	TRUE	Empty	RNA helicase OS=Komagataella phaffii (strain GS115 / ATCC 20864) OX=644223 GN=PAS_chr3_0818 PE=3 SV=1	C4R5N5_KOMPG (+1)	61 kDa	TRUE		unknown	0	0	2	0	0	0	0	0	0	0	0	0
730.2	TRUE	Empty	RNA helicase OS=Komagataella pastoris OX=4922 GN=ROK1 PE=3 SV=1	A0A1B2JF16_PICPA	61 kDa	TRUE		unknown	0	0	1	0	0	1	0	0	0	0	1	0
731	TRUE	Empty	tr|A0A1B2JJ24|A0A1B2JJ24_PICPA-DECOY	tr|A0A1B2JJ24|A0A1B2JJ24_PICPA-DECOY	?	TRUE		unknown	0	0	1	0	5	1	0	0	1	4	0	0
732	TRUE	Empty	tr|C4R2U0|C4R2U0_KOMPG-DECOY	tr|C4R2U0|C4R2U0_KOMPG-DECOY (+1)	?	TRUE		unknown	3	0	1	1	4	2	0	1	2	7	3	0
733	TRUE	Empty	tr|A0A1B2JHC4|A0A1B2JHC4_PICPA-DECOY	tr|A0A1B2JHC4|A0A1B2JHC4_PICPA-DECOY	?	TRUE		unknown	2	0	1	0	2	3	0	0	2	1	0	0
734	TRUE	Empty	BA75_02200T0 OS=Komagataella pastoris OX=4922 GN=SMC3 PE=4 SV=1	A0A1B2JCK8_PICPA	132 kDa	TRUE		unknown	1	0	0	1	0	2	0	0	2	0	1	0
735	TRUE	Empty	COX1 mRNA translational activator OS=Komagataella phaffii (strain ATCC 76273 / CBS 7435 / CECT 11047 / NRRL Y-11430 / Wegner 21-1) OX=981350 GN=PET309 PE=4 SV=1	F2QXX7_KOMPC	122 kDa	TRUE		unknown	1	0	0	1	2	2	0	0	1	0	0	0
736	TRUE	Empty	tr|A0A1G4KPT3|A0A1G4KPT3_KOMPC-DECOY	tr|A0A1G4KPT3|A0A1G4KPT3_KOMPC-DECOY (+1)	?	TRUE		unknown	0	0	0	0	0	1	0	0	0	2	0	0
737	TRUE	Empty	Cluster of BA75_01634T0 OS=Komagataella pastoris OX=4922 GN=GYP1 PE=4 SV=1 (A0A1B2J9J6_PICPA)	A0A1B2J9J6_PICPA	58 kDa	TRUE		unknown	0	0	0	1	2	2	0	0	0	2	1	0
737.1	TRUE	Empty	BA75_01634T0 OS=Komagataella pastoris OX=4922 GN=GYP1 PE=4 SV=1	A0A1B2J9J6_PICPA	58 kDa	TRUE		unknown	0	0	0	1	2	2	0	0	0	2	1	0
737.2	TRUE	Empty	Cis-golgi GTPase-activating protein OS=Komagataella phaffii (strain ATCC 76273 / CBS 7435 / CECT 11047 / NRRL Y-11430 / Wegner 21-1) OX=981350 GN=GYP1 PE=4 SV=1	F2QNF2_KOMPC	57 kDa	TRUE		unknown	0	0	0	0	2	1	0	0	0	1	1	0
738	TRUE	Empty	Cluster of tr|C4R7S8|C4R7S8_KOMPG-DECOY	tr|C4R7S8|C4R7S8_KOMPG-DECOY [3]	?	TRUE		unknown	2	0	0	1	2	0	0	0	2	2	0	0
738.1	TRUE	Empty	tr|C4R7S8|C4R7S8_KOMPG-DECOY	tr|C4R7S8|C4R7S8_KOMPG-DECOY (+1)	?	TRUE		unknown	1	0	0	0	2	0	0	0	1	2	0	0
738.2	TRUE	Empty	tr|A0A1B2JIG5|A0A1B2JIG5_PICPA-DECOY	tr|A0A1B2JIG5|A0A1B2JIG5_PICPA-DECOY	?	TRUE		unknown	1	0	0	1	1	0	0	0	2	0	0	0
739	TRUE	Empty	Cluster of tr|C4R8J5|C4R8J5_KOMPG-DECOY	tr|C4R8J5|C4R8J5_KOMPG-DECOY [3]	?	TRUE		unknown	2	0	2	2	0	2	0	0	0	4	2	0
739.1	TRUE	Empty	tr|C4R8J5|C4R8J5_KOMPG-DECOY	tr|C4R8J5|C4R8J5_KOMPG-DECOY (+1)	?	TRUE		unknown	1	0	2	2	0	2	0	0	0	2	1	0
739.2	TRUE	Empty	tr|A0A1B2JHL5|A0A1B2JHL5_PICPA-DECOY	tr|A0A1B2JHL5|A0A1B2JHL5_PICPA-DECOY	?	TRUE		unknown	1	0	1	1	0	1	0	0	0	4	2	0
740	TRUE	Empty	Cluster of tr|A0A1B2JGI6|A0A1B2JGI6_PICPA-DECOY	tr|A0A1B2JGI6|A0A1B2JGI6_PICPA-DECOY	?	TRUE		unknown	0	0	0	0	1	2	0	0	1	1	0	0
740.1	TRUE	Empty	tr|A0A1B2JGI6|A0A1B2JGI6_PICPA-DECOY	tr|A0A1B2JGI6|A0A1B2JGI6_PICPA-DECOY	?	TRUE		unknown	0	0	0	0	1	2	0	0	1	1	0	0
740.2	TRUE	Empty	tr|C4R603|C4R603_KOMPG-DECOY	tr|C4R603|C4R603_KOMPG-DECOY (+1)	?	TRUE		unknown	0	0	0	0	0	1	0	0	0	0	0	0
741	TRUE	Empty	Cluster of tr|A0A1B2J9L4|A0A1B2J9L4_PICPA-DECOY	tr|A0A1B2J9L4|A0A1B2J9L4_PICPA-DECOY [3]	?	TRUE		unknown	0	0	0	1	3	2	0	0	1	0	0	0
741.1	TRUE	Empty	tr|A0A1B2J9L4|A0A1B2J9L4_PICPA-DECOY	tr|A0A1B2J9L4|A0A1B2J9L4_PICPA-DECOY	?	TRUE		unknown	0	0	0	1	3	1	0	0	1	0	0	0
741.2	TRUE	Empty	tr|C4QY29|C4QY29_KOMPG-DECOY	tr|C4QY29|C4QY29_KOMPG-DECOY (+1)	?	TRUE		unknown	0	0	0	1	2	2	0	0	1	0	0	0
742	TRUE	Empty	Cluster of tr|C4R3E0|C4R3E0_KOMPG-DECOY	tr|C4R3E0|C4R3E0_KOMPG-DECOY [3]	?	TRUE		unknown	2	0	0	0	4	1	0	0	0	3	0	0
742.1	TRUE	Empty	tr|C4R3E0|C4R3E0_KOMPG-DECOY	tr|C4R3E0|C4R3E0_KOMPG-DECOY (+1)	?	TRUE		unknown	2	0	0	0	4	1	0	0	0	2	0	0
742.2	TRUE	Empty	tr|A0A1B2J8F6|A0A1B2J8F6_PICPA-DECOY	tr|A0A1B2J8F6|A0A1B2J8F6_PICPA-DECOY	?	TRUE		unknown	1	0	0	0	4	1	0	0	0	3	0	0
743	TRUE	Empty	Cluster of BA75_00783T0 OS=Komagataella pastoris OX=4922 GN=TBF1 PE=4 SV=1 (A0A1B2J9I1_PICPA)	A0A1B2J9I1_PICPA	88 kDa	TRUE		unknown	0	0	1	0	2	0	0	0	0	1	0	0
743.1	TRUE	Empty	BA75_00783T0 OS=Komagataella pastoris OX=4922 GN=TBF1 PE=4 SV=1	A0A1B2J9I1_PICPA	88 kDa	TRUE		unknown	0	0	1	0	1	0	0	0	0	0	0	0
743.2	TRUE	Empty	Telobox-containing general regulatory factor OS=Komagataella phaffii (strain GS115 / ATCC 20864) OX=644223 GN=PAS_chr1-4_0281 PE=4 SV=1	C4QXZ4_KOMPG (+1)	88 kDa	TRUE		unknown	0	0	1	0	1	0	0	0	0	1	0	0
744	TRUE	Empty	Cluster of Forkhead family transcription factor with a major role in the expression of G2/M phase genes OS=Komagataella phaffii (strain GS115 / ATCC 20864) OX=644223 GN=PAS_chr4_0205 PE=4 SV=1 (C4R756_KOMPG)	C4R756_KOMPG	67 kDa	TRUE		unknown	1	0	0	0	0	1	0	0	0	3	1	0
744.1	TRUE	Empty	Forkhead family transcription factor with a major role in the expression of G2/M phase genes OS=Komagataella phaffii (strain GS115 / ATCC 20864) OX=644223 GN=PAS_chr4_0205 PE=4 SV=1	C4R756_KOMPG (+1)	67 kDa	TRUE		unknown	0	0	0	0	0	1	0	0	0	1	1	0
744.2	TRUE	Empty	BA75_03105T0 OS=Komagataella pastoris OX=4922 GN=ATY40_BA7503105 PE=4 SV=1	A0A1B2JC98_PICPA	67 kDa	TRUE		unknown	1	0	0	0	0	1	0	0	0	3	0	0
745	TRUE	Empty	UTP--glucose-1-phosphate uridylyltransferase OS=Komagataella pastoris OX=4922 GN=UGP1 PE=3 SV=1	A0A1B2J564_PICPA (+2)	56 kDa			unknown	0	14	0	0	2	0	2	0	1	9	15	2
746	TRUE	Empty	tr|C4QWK2|C4QWK2_KOMPG-DECOY	tr|C4QWK2|C4QWK2_KOMPG-DECOY (+1)	?	TRUE		unknown	0	0	0	1	2	0	0	0	3	1	1	0
747	TRUE	Empty	tr|C4QX73|C4QX73_KOMPG-DECOY	tr|C4QX73|C4QX73_KOMPG-DECOY (+1)	?	TRUE		unknown	1	0	1	0	4	2	0	0	1	1	0	0
748	TRUE	Empty	pullulanase (Fragment) OS=Lederbergia lenta OX=1467 GN=iam1 PE=3 SV=1	A0A075BIV0_LEDLE	101 kDa			unknown	1	0	1	0	2	2	0	0	0	0	0	0
749	TRUE	Empty	Protein transport protein sec16 OS=Komagataella phaffii (strain ATCC 76273 / CBS 7435 / CECT 11047 / NRRL Y-11430 / Wegner 21-1) OX=981350 GN=SEC16 PE=3 SV=1	F2R092_KOMPC (+1)	281 kDa	TRUE		unknown	0	0	1	0	1	0	0	0	1	3	0	0
750	TRUE	Empty	DNA-directed RNA polymerase OS=Komagataella phaffii (strain ATCC 76273 / CBS 7435 / CECT 11047 / NRRL Y-11430 / Wegner 21-1) OX=981350 GN=RPO41 PE=3 SV=1	F2QMY2_KOMPC	152 kDa	TRUE		unknown	1	0	0	3	2	0	0	0	0	1	1	0
751	TRUE	Empty	Single-stranded DNA endonuclease (With Rad10p) OS=Komagataella phaffii (strain GS115 / ATCC 20864) OX=644223 GN=PAS_chr2-2_0184 PE=3 SV=1	C4R2L3_KOMPG (+1)	110 kDa	TRUE		unknown	0	0	1	0	2	0	0	0	0	0	0	0
752	TRUE	Empty	tr|A0A1B2J8V1|A0A1B2J8V1_PICPA-DECOY	tr|A0A1B2J8V1|A0A1B2J8V1_PICPA-DECOY	?	TRUE		unknown	1	0	2	0	2	1	0	0	3	1	0	0
753	TRUE	Empty	Elongator complex protein 3 OS=Komagataella pastoris OX=4922 GN=ELP3 PE=3 SV=1	A0A1B2JDU5_PICPA (+2)	63 kDa			unknown	1	0	1	0	2	1	0	0	2	1	0	0
754	TRUE	Empty	tr|F2QVC6|F2QVC6_KOMPC-DECOY	tr|F2QVC6|F2QVC6_KOMPC-DECOY	?	TRUE		unknown	0	0	1	2	1	0	0	0	0	2	0	0
755	TRUE	Empty	tr|C4QVC9|C4QVC9_KOMPG-DECOY	tr|C4QVC9|C4QVC9_KOMPG-DECOY (+1)	?	TRUE		unknown	1	0	4	0	1	1	0	0	0	2	1	0
756	TRUE	Empty	Cluster of tr|A0A1B2J8B4|A0A1B2J8B4_PICPA-DECOY	tr|A0A1B2J8B4|A0A1B2J8B4_PICPA-DECOY	?	TRUE		unknown	1	0	0	1	1	0	0	1	0	2	0	0
756.1	TRUE	Empty	tr|A0A1B2J8B4|A0A1B2J8B4_PICPA-DECOY	tr|A0A1B2J8B4|A0A1B2J8B4_PICPA-DECOY	?	TRUE		unknown	0	0	0	1	1	0	0	1	0	1	0	0
756.2	TRUE	Empty	tr|F2QWH4|F2QWH4_KOMPC-DECOY	tr|F2QWH4|F2QWH4_KOMPC-DECOY	?	TRUE		unknown	1	0	0	0	0	0	0	1	0	2	0	0
757	TRUE	Empty	Cluster of tr|C4QY56|C4QY56_KOMPG-DECOY	tr|C4QY56|C4QY56_KOMPG-DECOY	?	TRUE		unknown	0	0	0	1	2	2	0	1	0	2	0	0
757.1	TRUE	Empty	tr|C4QY56|C4QY56_KOMPG-DECOY	tr|C4QY56|C4QY56_KOMPG-DECOY (+1)	?	TRUE		unknown	0	0	0	0	2	2	0	1	0	2	0	0
757.2	TRUE	Empty	tr|A0A1B2J6V4|A0A1B2J6V4_PICPA-DECOY	tr|A0A1B2J6V4|A0A1B2J6V4_PICPA-DECOY	?	TRUE		unknown	0	0	0	1	2	2	0	1	0	2	0	0
758	TRUE	Empty	Cluster of tr|A0A1B2J839|A0A1B2J839_PICPA-DECOY	tr|A0A1B2J839|A0A1B2J839_PICPA-DECOY [2]	?	TRUE		unknown	0	0	1	1	3	1	0	0	0	0	0	0
758.1	TRUE	Empty	tr|A0A1B2J839|A0A1B2J839_PICPA-DECOY	tr|A0A1B2J839|A0A1B2J839_PICPA-DECOY	?	TRUE		unknown	0	0	0	1	2	1	0	0	0	0	0	0
758.2	TRUE	Empty	tr|C4QVT8|C4QVT8_KOMPG-DECOY	tr|C4QVT8|C4QVT8_KOMPG-DECOY (+1)	?	TRUE		unknown	0	0	1	1	3	1	0	0	0	0	0	0
759	TRUE	Empty	Cluster of tr|A0A1B2JFJ2|A0A1B2JFJ2_PICPA-DECOY	tr|A0A1B2JFJ2|A0A1B2JFJ2_PICPA-DECOY	?	TRUE		unknown	0	0	1	0	2	1	0	0	3	3	0	0
759.1	TRUE	Empty	tr|A0A1B2JFJ2|A0A1B2JFJ2_PICPA-DECOY	tr|A0A1B2JFJ2|A0A1B2JFJ2_PICPA-DECOY	?	TRUE		unknown	0	0	1	0	2	1	0	0	3	3	0	0
759.2	TRUE	Empty	tr|C4QYN5|C4QYN5_KOMPG-DECOY	tr|C4QYN5|C4QYN5_KOMPG-DECOY (+1)	?	TRUE		unknown	0	0	1	0	2	0	0	0	1	0	0	0
760	TRUE	Empty	Cluster of tr|A0A1B2JEZ1|A0A1B2JEZ1_PICPA-DECOY	tr|A0A1B2JEZ1|A0A1B2JEZ1_PICPA-DECOY [3]	?	TRUE		unknown	2	0	1	2	0	0	0	0	0	1	1	0
760.1	TRUE	Empty	tr|A0A1B2JEZ1|A0A1B2JEZ1_PICPA-DECOY	tr|A0A1B2JEZ1|A0A1B2JEZ1_PICPA-DECOY	?	TRUE		unknown	1	0	1	2	0	0	0	0	0	1	1	0
760.2	TRUE	Empty	tr|C4R5Z0|C4R5Z0_KOMPG-DECOY	tr|C4R5Z0|C4R5Z0_KOMPG-DECOY (+1)	?	TRUE		unknown	2	0	0	0	0	0	0	0	0	1	1	0
761	TRUE	Empty	Cluster of tr|A0A1B2JA64|A0A1B2JA64_PICPA-DECOY	tr|A0A1B2JA64|A0A1B2JA64_PICPA-DECOY [2]	?	TRUE		unknown	1	0	0	0	1	0	0	0	2	2	0	0
761.1	TRUE	Empty	tr|A0A1B2JA64|A0A1B2JA64_PICPA-DECOY	tr|A0A1B2JA64|A0A1B2JA64_PICPA-DECOY	?	TRUE		unknown	1	0	0	0	1	0	0	0	1	1	0	0
761.2	TRUE	Empty	tr|C4R0N9|C4R0N9_KOMPG-DECOY	tr|C4R0N9|C4R0N9_KOMPG-DECOY (+1)	?	TRUE		unknown	0	0	0	0	1	0	0	0	1	2	0	0
762	TRUE	Empty	Cluster of tr|A0A1B2J5P7|A0A1B2J5P7_PICPA-DECOY	tr|A0A1B2J5P7|A0A1B2J5P7_PICPA-DECOY [2]	?	TRUE		unknown	0	0	0	0	0	0	0	0	0	3	0	0
762.1	TRUE	Empty	tr|A0A1B2J5P7|A0A1B2J5P7_PICPA-DECOY	tr|A0A1B2J5P7|A0A1B2J5P7_PICPA-DECOY	?	TRUE		unknown	0	0	0	0	0	0	0	0	0	2	0	0
762.2	TRUE	Empty	tr|C4QW84|C4QW84_KOMPG-DECOY	tr|C4QW84|C4QW84_KOMPG-DECOY (+1)	?	TRUE		unknown	0	0	0	0	0	0	0	0	0	3	0	0
763	TRUE	Empty	Cluster of BA75_03063T0 OS=Komagataella pastoris OX=4922 GN=CAJ1 PE=4 SV=1 (A0A1B2JDT1_PICPA)	A0A1B2JDT1_PICPA [3]	48 kDa	TRUE		unknown	1	0	0	0	4	1	0	0	0	1	0	0
763.1	TRUE	Empty	BA75_03063T0 OS=Komagataella pastoris OX=4922 GN=CAJ1 PE=4 SV=1	A0A1B2JDT1_PICPA	48 kDa	TRUE		unknown	1	0	0	0	3	1	0	0	0	1	0	0
[truncated: 5,383 more rows]
